# Supplementary material for: HS-5 and HS-27A Stromal Cell Lines to Study Bone Marrow Mesenchymal Stromal Cell-Mediated Support to Cancer Development
Source: Front Cell Dev Biol. 2020 Nov 5;8:584232. doi: 10.3389/fcell.2020.584232 (PMC7674674; doi:10.3389/fcell.2020.584232)
Supplement: Supplementary file 6 [file Table_1.XLSX]

## Sheet: HS5vsMSC
C2	logFC	AveExpr	t	P.Value	adj.P.Val	B
GRAHAM_CML_DIVIDING_VS_NORMAL_DIVIDING_UP	-0.495613	-0.0261871	-6.28335	2.44127e-06	0.00991552	4.59964
REACTOME_ANCHORING_FIBRIL_FORMATION	-0.543467	0.0320915	-6.11525	3.60564e-06	0.00991552	4.26631
BIOCARTA_FBW7_PATHWAY	-0.569639	0.0449856	-5.50939	1.50854e-05	0.0178711	3.03123
SCHMAHL_PDGF_SIGNALING	-0.629325	-0.0126918	-5.46016	1.69726e-05	0.0178711	2.92877
KORKOLA_TERATOMA_UP	-0.446253	0.0297868	-5.35631	2.17799e-05	0.0178711	2.71165
BIOCARTA_NKT_PATHWAY	-0.380427	-0.0124223	-5.34182	2.25528e-05	0.0178711	2.68126
KANG_AR_TARGETS_UP	-0.4758	-0.0236731	-5.33262	2.30578e-05	0.0178711	2.66195
DASU_IL6_SIGNALING_DN	-0.696493	0.0145054	-5.28287	2.59944e-05	0.0178711	2.55739
MORI_PRE_BI_LYMPHOCYTE_DN	-0.283663	-0.0152873	-4.86333	7.194e-05	0.0439633	1.66589
RHEIN_ALL_GLUCOCORTICOID_THERAPY_UP	-0.31594	-0.00227277	-4.65976	0.000118299	0.0630734	1.22832
HE_PTEN_TARGETS_UP	-0.362602	0.0242324	-4.63225	0.000126541	0.0630734	1.16899
REACTOME_MOLYBDENUM_COFACTOR_BIOSYNTHESIS	0.709018	-0.0028394	4.58308	0.000142732	0.0630734	1.06288
WESTON_VEGFA_TARGETS_12HR	-0.355354	-0.0289346	-4.56531	0.000149082	0.0630734	1.0245
DUNNE_TARGETS_OF_AML1_MTG8_FUSION_UP	-0.292478	-0.00719657	-4.48918	0.000179661	0.0633164	0.859952
LIN_MELANOMA_COPY_NUMBER_DN	-0.470386	0.0283959	-4.48202	0.000182839	0.0633164	0.844484
CORRE_MULTIPLE_MYELOMA_UP	-0.368184	0.00174683	-4.47901	0.000184193	0.0633164	0.837973
LIU_TARGETS_OF_VMYB_VS_CMYB_DN	-0.265275	0.0128037	-4.34015	0.000258918	0.0820194	0.537355
ROYLANCE_BREAST_CANCER_16Q_COPY_NUMBER_DN	-0.389214	-0.00991578	-4.30577	0.000281695	0.0820194	0.462879
REACTOME_RUNX1_REGULATES_TRANSCRIPTION_OF_GENES_INVOLVED_IN_INTERLEUKIN_SIGNALING	-0.745592	0.0043004	-4.29464	0.00028949	0.0820194	0.438766
GARGALOVIC_RESPONSE_TO_OXIDIZED_PHOSPHOLIPIDS_BROWN_UP	-0.520745	-0.00912731	-4.28248	0.000298252	0.0820194	0.412421
REACTOME_SIGNALING_BY_MET	-0.264484	0.0056199	-4.25676	0.000317668	0.0831988	0.356696
HONRADO_BREAST_CANCER_BRCA1_VS_BRCA2	0.381691	-0.0240643	4.21139	0.000355045	0.0849043	0.258394
REACTOME_RUNX1_REGULATES_TRANSCRIPTION_OF_GENES_INVOLVED_IN_BCR_SIGNALING	-0.62224	0.0355777	-4.19639	0.000368344	0.0849043	0.225894
TARTE_PLASMA_CELL_VS_B_LYMPHOCYTE_DN	-0.267127	0.0166104	-4.18155	0.000381986	0.0849043	0.19375
STAMBOLSKY_TARGETS_OF_MUTATED_TP53_UP	-0.221038	0.00115679	-4.15942	0.000403274	0.0849043	0.145813
CAFFAREL_RESPONSE_TO_THC_8HR_3_DN	0.377186	-0.020115	4.14688	0.000415861	0.0849043	0.118644
MARKEY_RB1_CHRONIC_LOF_DN	-0.328551	0.0108178	-4.12359	0.000440279	0.0849043	0.0682043
BOYLAN_MULTIPLE_MYELOMA_PCA1_DN	-0.363918	-0.0142567	-4.10762	0.000457842	0.0849043	0.0336255
CHIBA_RESPONSE_TO_TSA_UP	-0.360492	0.00524854	-4.08659	0.000482038	0.0849043	-0.0119043
MYLLYKANGAS_AMPLIFICATION_HOT_SPOT_2	-0.656553	0.0349682	-4.07537	0.00049546	0.0849043	-0.0361858
NIKOLSKY_BREAST_CANCER_20Q12_Q13_AMPLICON	0.282111	0.00227405	4.06611	0.000506821	0.0849043	-0.0562289
GARGALOVIC_RESPONSE_TO_OXIDIZED_PHOSPHOLIPIDS_LIGHTYELLOW_UP	-0.358192	-0.00390364	-4.06111	0.000513069	0.0849043	-0.0670614
ZHAN_V1_LATE_DIFFERENTIATION_GENES_UP	-0.321558	-0.00585929	-4.05651	0.000518872	0.0849043	-0.0770058
HOWLIN_CITED1_TARGETS_2_DN	-0.413722	0.00860999	-4.03723	0.000543952	0.0849043	-0.118741
FOSTER_KDM1A_TARGETS_DN	0.21844	-0.00299496	4.02686	0.000557925	0.0849043	-0.141167
FAELT_B_CLL_WITH_VH_REARRANGEMENTS_DN	-0.236312	-0.00132384	-4.01319	0.00057689	0.0849043	-0.170721
PID_P38_GAMMA_DELTA_PATHWAY	0.403659	0.0174524	4.01124	0.000579653	0.0849043	-0.174945
LIAN_NEUTROPHIL_GRANULE_CONSTITUENTS	-0.362188	-0.000308472	-3.95492	0.000665226	0.0849043	-0.29669
WALLACE_JAK2_TARGETS_UP	0.351016	-0.0379067	3.95456	0.000665799	0.0849043	-0.297452
ZWANG_CLASS_3_TRANSIENTLY_INDUCED_BY_EGF	-0.255559	0.0152785	-3.9527	0.000668837	0.0849043	-0.301476
BIOCARTA_VDR_PATHWAY	0.397002	0.00334952	3.95221	0.000669646	0.0849043	-0.302546
BIOCARTA_CPSF_PATHWAY	0.556149	0.00494993	3.94253	0.000685667	0.0849043	-0.323449
RUTELLA_RESPONSE_TO_CSF2RB_AND_IL4_DN	-0.201202	0.0125777	-3.93894	0.000691696	0.0849043	-0.331188
BRUECKNER_TARGETS_OF_MIRLET7A3_UP	-0.26568	-0.00337746	-3.93877	0.00069199	0.0849043	-0.331564
CHEN_LVAD_SUPPORT_OF_FAILING_HEART_UP	-0.297236	0.00380736	-3.93719	0.000694671	0.0849043	-0.334983
REACTOME_COLLAGEN_FORMATION	-0.352576	-0.00782025	-3.88105	0.0007967	0.0873488	-0.456135
BIOCARTA_SUMO_PATHWAY	0.576039	0.0199292	3.87848	0.000801707	0.0873488	-0.461673
RASHI_RESPONSE_TO_IONIZING_RADIATION_2	-0.238613	0.0064392	-3.87735	0.000803912	0.0873488	-0.464102
GYORFFY_MITOXANTRONE_RESISTANCE	-0.343848	-0.0111106	-3.87731	0.000803992	0.0873488	-0.46419
PID_INTEGRIN_CS_PATHWAY	-0.28346	-0.000592857	-3.875	0.000808539	0.0873488	-0.469176
WANG_IMMORTALIZED_BY_HOXA9_AND_MEIS1_DN	-0.380555	0.00739154	-3.87428	0.000809961	0.0873488	-0.470729
RODRIGUES_THYROID_CARCINOMA_DN	-0.242046	-0.000693278	-3.84287	0.00087443	0.0881881	-0.538427
PODAR_RESPONSE_TO_ADAPHOSTIN_UP	-0.292548	-0.0135178	-3.834	0.000893522	0.0881881	-0.557518
LEIN_ASTROCYTE_MARKERS	-0.270817	-0.00928366	-3.83399	0.000893557	0.0881881	-0.557552
REACTOME_SYNDECAN_INTERACTIONS	-0.42318	-0.0253369	-3.82113	0.000921982	0.0881881	-0.585232
HOSHIDA_LIVER_CANCER_SUBCLASS_S1	-0.232274	0.00450544	-3.81381	0.000938562	0.0881881	-0.600984
REACTOME_SUMO_IS_TRANSFERRED_FROM_E1_TO_E2_UBE2I_UBC9	0.554047	0.0359587	3.81085	0.000945348	0.0881881	-0.607351
REACTOME_CROSSLINKING_OF_COLLAGEN_FIBRILS	-0.45479	0.00488702	-3.80881	0.000950073	0.0881881	-0.611757
BOYLAN_MULTIPLE_MYELOMA_C_DN	-0.221269	0.00759909	-3.80198	0.000966003	0.0881881	-0.626453
KUMAMOTO_RESPONSE_TO_NUTLIN_3A_DN	0.763762	0.060465	3.79473	0.000983196	0.0881881	-0.642044
TIEN_INTESTINE_PROBIOTICS_24HR_DN	-0.272664	-0.00207658	-3.79453	0.000983673	0.0881881	-0.642472
REACTOME_ASSEMBLY_OF_COLLAGEN_FIBRILS_AND_OTHER_MULTIMERIC_STRUCTURES	-0.346686	-0.00685623	-3.78571	0.00100501	0.0881881	-0.661438
BOQUEST_STEM_CELL_DN	-0.242606	0.0164815	-3.78361	0.00101015	0.0881881	-0.665948
BEGUM_TARGETS_OF_PAX3_FOXO1_FUSION_DN	-0.22838	0.00813659	-3.76506	0.00105679	0.0908179	-0.70583
TAKEDA_TARGETS_OF_NUP98_HOXA9_FUSION_8D_DN	-0.252226	0.00330824	-3.7449	0.00110985	0.092671	-0.749118
FREDERICK_PRKCI_TARGETS	-0.412643	-0.00697263	-3.73729	0.00113056	0.092671	-0.76545
REACTOME_RMTS_METHYLATE_HISTONE_ARGININES	0.328015	0.0192607	3.71848	0.00118342	0.092671	-0.805817
PASQUALUCCI_LYMPHOMA_BY_GC_STAGE_UP	-0.229291	0.00665358	-3.71845	0.00118351	0.092671	-0.805886
BIOCARTA_MPR_PATHWAY	0.370509	-0.0206435	3.71769	0.00118568	0.092671	-0.807502
REACTOME_SUMO_IS_CONJUGATED_TO_E1_UBA2:SAE1	0.620738	0.0232402	3.71703	0.0011876	0.092671	-0.808931
PID_TGFBR_PATHWAY	-0.226369	0.0062036	-3.71402	0.0011963	0.092671	-0.815376
HAHTOLA_CTCL_PATHOGENESIS	-0.384103	-0.0017698	-3.70275	0.00122946	0.0939175	-0.839532
REACTOME_MET_ACTIVATES_PTK2_SIGNALING	-0.352704	0.0022064	-3.68619	0.00127989	0.0959076	-0.875031
TARTE_PLASMA_CELL_VS_B_LYMPHOCYTE_UP	-0.320069	0.00392887	-3.68275	0.00129059	0.0959076	-0.882388
SHIPP_DLBCL_VS_FOLLICULAR_LYMPHOMA_DN	-0.254417	0.000759746	-3.67728	0.00130783	0.0959076	-0.894105
WANG_ESOPHAGUS_CANCER_VS_NORMAL_UP	-0.250741	-0.000281514	-3.67074	0.00132872	0.0961572	-0.908097
REACTOME_RUNX1_REGULATES_ESTROGEN_RECEPTOR_MEDIATED_TRANSCRIPTION	-0.541534	0.0443509	-3.64747	0.00140578	0.100413	-0.957876
GROSS_HYPOXIA_VIA_ELK3_DN	-0.193593	0.00932462	-3.64073	0.0014289	0.100756	-0.972283
SEMBA_FHIT_TARGETS_DN	0.678379	0.03117	3.62442	0.00148643	0.102507	-1.00713
SWEET_KRAS_TARGETS_UP	-0.369533	-0.0092301	-3.62052	0.00150052	0.102507	-1.01546
KEGG_AMINOACYL_TRNA_BIOSYNTHESIS	0.438374	0.00891206	3.61482	0.00152135	0.102507	-1.02762
RAFFEL_VEGFA_TARGETS_DN	-0.456819	0.0571218	-3.60779	0.00154744	0.102507	-1.04263
SCHOEN_NFKB_SIGNALING	-0.321267	0.00587907	-3.5944	0.00159835	0.102507	-1.0712
FLOTHO_PEDIATRIC_ALL_THERAPY_RESPONSE_DN	0.322484	0.00631302	3.5936	0.00160142	0.102507	-1.07289
LINDGREN_BLADDER_CANCER_CLUSTER_2A_DN	-0.229311	-0.0029897	-3.59155	0.00160937	0.102507	-1.07726
LANDIS_ERBB2_BREAST_TUMORS_65_UP	-0.338889	0.0183255	-3.59134	0.00161019	0.102507	-1.07771
SMIRNOV_CIRCULATING_ENDOTHELIOCYTES_IN_CANCER_UP	-0.230034	-0.00269673	-3.58495	0.00163526	0.102507	-1.09134
REACTOME_TRNA_AMINOACYLATION	0.43504	0.0120172	3.58372	0.00164011	0.102507	-1.09396
NIKOLSKY_BREAST_CANCER_12Q13_Q21_AMPLICON	-0.217562	0.00434217	-3.57111	0.00169082	0.104489	-1.12082
NAKAMURA_ADIPOGENESIS_LATE_DN	-0.273642	0.0167819	-3.5617	0.00172967	0.105702	-1.14087
CROMER_TUMORIGENESIS_UP	-0.233795	0.0121151	-3.55611	0.00175315	0.10596	-1.15276
REACTOME_UNWINDING_OF_DNA	0.718172	0.0272193	3.54298	0.00180952	0.10786	-1.18068
OHASHI_AURKB_TARGETS	0.472183	0.00404773	3.53864	0.00182854	0.10786	-1.1899
KHETCHOUMIAN_TRIM24_TARGETS_UP	-0.292363	0.000464308	-3.52532	0.00188818	0.10786	-1.2182
REACTOME_PURINE_RIBONUCLEOSIDE_MONOPHOSPHATE_BIOSYNTHESIS	0.488107	0.0528585	3.52507	0.00188932	0.10786	-1.21873
GARGALOVIC_RESPONSE_TO_OXIDIZED_PHOSPHOLIPIDS_BLUE_UP	-0.303656	0.0116431	-3.52196	0.00190355	0.10786	-1.22535
PID_PLK1_PATHWAY	0.45926	0.00726166	3.51883	0.00191797	0.10786	-1.23201
SASAKI_TARGETS_OF_TP73_AND_TP63	-0.476474	0.0143269	-3.51498	0.00193579	0.10786	-1.24016
KYNG_ENVIRONMENTAL_STRESS_RESPONSE_NOT_BY_GAMMA_IN_WS	-0.294632	0.0301659	-3.51376	0.00194148	0.10786	-1.24275
FERRANDO_HOX11_NEIGHBORS	0.45386	0.00530787	3.50336	0.00199071	0.108915	-1.26483
REACTOME_SIGNALING_BY_TGF_BETA_RECEPTOR_COMPLEX_IN_CANCER	-0.375362	0.00674051	-3.49755	0.00201876	0.108915	-1.27716
REACTOME_COLLAGEN_BIOSYNTHESIS_AND_MODIFYING_ENZYMES	-0.369284	-0.0124547	-3.49731	0.00201988	0.108915	-1.27765
REACTOME_ANTIGEN_ACTIVATES_B_CELL_RECEPTOR_BCR_LEADING_TO_GENERATION_OF_SECOND_MESSENGERS	-0.274052	-0.00305596	-3.48375	0.00208687	0.111435	-1.30641
EHRLICH_ICF_SYNDROM_UP	-0.40266	0.0310521	-3.46756	0.00216965	0.112489	-1.34069
BIOCARTA_RANMS_PATHWAY	0.639033	0.0314517	3.45977	0.00221058	0.112489	-1.35716
GESERICK_TERT_TARGETS_DN	-0.410975	0.0314176	-3.45732	0.00222365	0.112489	-1.36236
LAIHO_COLORECTAL_CANCER_SERRATED_UP	-0.208488	0.00345432	-3.44984	0.00226392	0.112489	-1.37817
TAKEDA_TARGETS_OF_NUP98_HOXA9_FUSION_6HR_UP	-0.271371	0.0176116	-3.44488	0.00229101	0.112489	-1.38865
MITSIADES_RESPONSE_TO_APLIDIN_UP	-0.213849	0.00656548	-3.44339	0.00229921	0.112489	-1.3918
AMUNDSON_RESPONSE_TO_ARSENITE	-0.201905	0.00305223	-3.44073	0.00231394	0.112489	-1.39742
NAKAMURA_LUNG_CANCER	0.468056	0.0013703	3.44055	0.00231493	0.112489	-1.3978
GROSS_HYPOXIA_VIA_ELK3_AND_HIF1A_UP	-0.230713	0.016766	-3.43482	0.00234694	0.112489	-1.40989
ZHENG_BOUND_BY_FOXP3	-0.166529	0.0054848	-3.43393	0.00235196	0.112489	-1.41177
KUROKAWA_LIVER_CANCER_EARLY_RECURRENCE_DN	-0.515615	-0.0255949	-3.43291	0.00235772	0.112489	-1.41393
REACTOME_BETA_OXIDATION_OF_HEXANOYL_COA_TO_BUTANOYL_COA	0.554178	0.0313917	3.42503	0.00240267	0.112489	-1.43056
CHEBOTAEV_GR_TARGETS_DN	-0.252052	-0.00938516	-3.42357	0.00241109	0.112489	-1.43364
TONKS_TARGETS_OF_RUNX1_RUNX1T1_FUSION_SUSTAINED_IN_MONOCYTE_DN	-0.469618	0.0341889	-3.42232	0.00241831	0.112489	-1.43628
REACTOME_MET_ACTIVATES_RAS_SIGNALING	-0.343806	0.0010369	-3.42115	0.00242513	0.112489	-1.43875
REACTOME_IRE1ALPHA_ACTIVATES_CHAPERONES	-0.310077	0.00446489	-3.41965	0.00243386	0.112489	-1.44192
FERRANDO_T_ALL_WITH_MLL_ENL_FUSION_UP	-0.221806	0.00342114	-3.41369	0.00246884	0.113155	-1.45449
HOLLEMAN_DAUNORUBICIN_B_ALL_DN	0.333032	0.0252483	3.39992	0.00255161	0.113899	-1.48352
RAGHAVACHARI_PLATELET_SPECIFIC_GENES	-0.215557	-0.00405582	-3.39984	0.00255208	0.113899	-1.48368
IIZUKA_LIVER_CANCER_PROGRESSION_L1_G1_UP	-0.324588	-0.0196294	-3.3989	0.0025578	0.113899	-1.48565
WAKABAYASHI_ADIPOGENESIS_PPARG_BOUND_36HR	-0.229459	0.0121405	-3.39726	0.00256792	0.113899	-1.48913
THUM_SYSTOLIC_HEART_FAILURE_DN	-0.217114	-0.00241225	-3.38887	0.00261996	0.114549	-1.50679
ODONNELL_TARGETS_OF_MYC_AND_TFRC_UP	-0.27047	-0.0263209	-3.38603	0.00263776	0.114549	-1.51275
SHI_SPARC_TARGETS_DN	-0.355029	-0.00571244	-3.38231	0.00266137	0.114549	-1.52059
REACTOME_RESPONSE_TO_ELEVATED_PLATELET_CYTOSOLIC_CA2PLUS	-0.215515	-0.0119492	-3.3816	0.00266587	0.114549	-1.52208
MYLLYKANGAS_AMPLIFICATION_HOT_SPOT_25	0.40528	-0.0235094	3.36571	0.002769	0.117694	-1.55548
MCDOWELL_ACUTE_LUNG_INJURY_UP	-0.244986	0.0204731	-3.35786	0.00282143	0.117694	-1.57198
WEST_ADRENOCORTICAL_CARCINOMA_VS_ADENOMA_DN	-0.283472	-0.0204268	-3.35744	0.00282425	0.117694	-1.57286
REACTOME_MITOCHONDRIAL_TRNA_AMINOACYLATION	0.403633	0.0214595	3.35522	0.00283924	0.117694	-1.57752
CAFFAREL_RESPONSE_TO_THC_UP	-0.272349	0.0160749	-3.35422	0.00284606	0.117694	-1.57963
CASTELLANO_HRAS_AND_NRAS_TARGETS_DN	-0.408333	0.00568815	-3.35015	0.00287382	0.117955	-1.58817
CUI_TCF21_TARGETS_2_DN	-0.212074	-0.00149067	-3.3424	0.00292741	0.119265	-1.60442
REACTOME_PROCESSING_AND_ACTIVATION_OF_SUMO	0.396989	0.0156394	3.3378	0.00295972	0.119695	-1.61407
ZHAN_V1_LATE_DIFFERENTIATION_GENES_DN	0.39534	-0.00609826	3.33012	0.00301442	0.120718	-1.63017
WIERENGA_STAT5A_TARGETS_GROUP2	-0.225752	0.000687748	-3.3281	0.00302892	0.120718	-1.63439
CUI_GLUCOSE_DEPRIVATION	-0.222107	0.00640621	-3.31865	0.00309787	0.1225	-1.65418
KAN_RESPONSE_TO_ARSENIC_TRIOXIDE	-0.212754	0.00597878	-3.31591	0.00311818	0.1225	-1.65993
ZHENG_FOXP3_TARGETS_IN_THYMUS_UP	-0.209983	0.00413297	-3.30055	0.00323425	0.126159	-1.69205
XU_HGF_SIGNALING_NOT_VIA_AKT1_48HR_DN	0.379515	0.00727386	3.2926	0.00329593	0.127659	-1.70865
TIEN_INTESTINE_PROBIOTICS_2HR_DN	-0.183363	0.00822559	-3.28914	0.00332319	0.127702	-1.71589
MEINHOLD_OVARIAN_CANCER_LOW_GRADE_UP	-0.412133	-0.023518	-3.28658	0.00334348	0.127702	-1.72124
REACTOME_EXTRACELLULAR_MATRIX_ORGANIZATION	-0.241482	-0.00326426	-3.27867	0.00340684	0.129225	-1.73773
CLASPER_LYMPHATIC_VESSELS_DURING_METASTASIS_DN	-0.286839	-0.00844658	-3.27434	0.00344211	0.1295	-1.74678
PID_AURORA_B_PATHWAY	0.42043	0.00781195	3.27201	0.00346117	0.1295	-1.75163
REACTOME_ACTIVATED_NTRK3_SIGNALS_THROUGH_RAS	-0.340426	-0.0177987	-3.26635	0.003508	0.130365	-1.76343
MARKS_HDAC_TARGETS_DN	0.327926	-0.00267818	3.26179	0.00354615	0.130898	-1.77293
KEGG_CYTOSOLIC_DNA_SENSING_PATHWAY	0.246901	-0.0190016	3.25597	0.0035954	0.131831	-1.78505
GRASEMANN_RETINOBLASTOMA_WITH_6P_AMPLIFICATION	0.380509	0.00820436	3.24975	0.00364881	0.131887	-1.79799
GRATIAS_RETINOBLASTOMA_16Q24	-0.464452	0.00584056	-3.24334	0.0037047	0.131887	-1.81134
MORI_PLASMA_CELL_UP	-0.332408	0.0230356	-3.24113	0.00372417	0.131887	-1.81594
CHEN_HOXA5_TARGETS_6HR_DN	0.549133	0.0417599	3.2391	0.00374212	0.131887	-1.82016
ENGELMANN_CANCER_PROGENITORS_UP	-0.232513	-0.0175175	-3.23908	0.0037423	0.131887	-1.8202
STAMBOLSKY_TARGETS_OF_MUTATED_TP53_DN	0.2986	-0.00717843	3.23273	0.00379901	0.131887	-1.8334
ACOSTA_PROLIFERATION_INDEPENDENT_MYC_TARGETS_DN	-0.180558	0.00757912	-3.23232	0.00380263	0.131887	-1.83424
REACTOME_MASTL_FACILITATES_MITOTIC_PROGRESSION	0.525957	-0.0177161	3.22999	0.00382366	0.131887	-1.83908
TURJANSKI_MAPK11_TARGETS	-0.39091	0.0416179	-3.22977	0.00382564	0.131887	-1.83954
KREPPEL_CD99_TARGETS_DN	-0.460527	0.00641776	-3.22794	0.00384228	0.131887	-1.84334
CROONQUIST_STROMAL_STIMULATION_UP	-0.317306	-0.0181128	-3.22341	0.0038837	0.131887	-1.85275
PLASARI_TGFB1_TARGETS_1HR_DN	-0.493909	0.0215239	-3.2233	0.00388469	0.131887	-1.85298
REACTOME_BETA_OXIDATION_OF_LAUROYL_COA_TO_DECANOYL_COA_COA	0.620453	0.0391273	3.21176	0.00399216	0.133308	-1.87692
REACTOME_RNA_POLYMERASE_II_TRANSCRIPTION_TERMINATION	0.39347	0.014369	3.21074	0.00400185	0.133308	-1.87905
MATZUK_EARLY_ANTRAL_FOLLICLE	-0.34498	-0.0116327	-3.20886	0.00401966	0.133308	-1.88294
REACTOME_LYSINE_CATABOLISM	0.434211	-0.0226518	3.20581	0.00404869	0.133308	-1.88925
YAMASHITA_METHYLATED_IN_PROSTATE_CANCER	-0.217536	-0.0046012	-3.20181	0.00408713	0.133308	-1.89754
REACTOME_TRNA_PROCESSING_IN_THE_NUCLEUS	0.361267	0.00793115	3.19939	0.00411056	0.133308	-1.90256
REACTOME_GLYCOGEN_BREAKDOWN_GLYCOGENOLYSIS	-0.254592	0.0084364	-3.19492	0.00415422	0.133308	-1.91182
REACTOME_NON_INTEGRIN_MEMBRANE_ECM_INTERACTIONS	-0.350271	-0.0132641	-3.19412	0.00416201	0.133308	-1.91346
REN_ALVEOLAR_RHABDOMYOSARCOMA_DN	-0.245471	-0.00198409	-3.19398	0.00416339	0.133308	-1.91376
GALINDO_IMMUNE_RESPONSE_TO_ENTEROTOXIN	-0.193819	0.017678	-3.19305	0.00417258	0.133308	-1.91569
CASORELLI_ACUTE_PROMYELOCYTIC_LEUKEMIA_UP	-0.245429	-0.00251031	-3.18977	0.00420498	0.133308	-1.92247
GAVIN_PDE3B_TARGETS	-0.272141	-0.000456586	-3.18653	0.00423726	0.133308	-1.92918
MATZUK_PREOVULATORY_FOLLICLE	-0.391983	0.00705566	-3.18427	0.00425995	0.133308	-1.93386
YORDY_RECIPROCAL_REGULATION_BY_ETS1_AND_SP100_UP	0.320199	-0.00648446	3.18209	0.00428192	0.133308	-1.93837
KAAB_FAILED_HEART_VENTRICLE_DN	-0.222572	-0.00112702	-3.18012	0.00430179	0.133308	-1.94243
INAMURA_LUNG_CANCER_SCC_SUBTYPES_UP	0.368979	0.0012158	3.17889	0.00431433	0.133308	-1.94498
BIOCARTA_AMAN_PATHWAY	-0.299595	0.00832248	-3.17337	0.00437084	0.134181	-1.95639
THUM_SYSTOLIC_HEART_FAILURE_UP	-0.188013	0.00215625	-3.16852	0.00442108	0.134181	-1.9664
KEGG_N_GLYCAN_BIOSYNTHESIS	-0.283151	0.00242999	-3.16685	0.00443848	0.134181	-1.96985
AMIT_DELAYED_EARLY_GENES	-0.28054	0.00637582	-3.16669	0.00444019	0.134181	-1.97018
KYNG_ENVIRONMENTAL_STRESS_RESPONSE_NOT_BY_GAMMA_IN_OLD	-0.256381	0.0163636	-3.15838	0.00452793	0.136085	-1.98733
REACTOME_COPII_MEDIATED_VESICLE_TRANSPORT	-0.261247	0.0220544	-3.15051	0.00461261	0.13739	-2.00356
REACTOME_ECM_PROTEOGLYCANS	-0.303045	0.00286703	-3.14971	0.00462131	0.13739	-2.00522
REACTOME_CASPASE_ACTIVATION_VIA_DEPENDENCE_RECEPTORS_IN_THE_ABSENCE_OF_LIGAND	-0.410099	0.00627511	-3.14511	0.00467155	0.138001	-2.01469
LU_TUMOR_ANGIOGENESIS_UP	-0.232301	0.0124089	-3.14325	0.00469203	0.138001	-2.01852
BIOCARTA_INTRINSIC_PATHWAY	-0.322188	-0.00324038	-3.13892	0.00474001	0.138111	-2.02743
BOYLAN_MULTIPLE_MYELOMA_PCA1_UP	-0.20554	-0.000689301	-3.13838	0.00474601	0.138111	-2.02854
REACTOME_DEGRADATION_OF_THE_EXTRACELLULAR_MATRIX	-0.256589	-0.00913065	-3.1302	0.00483815	0.138599	-2.04537
PALOMERO_GSI_SENSITIVITY_UP	-0.328624	0.0211578	-3.12498	0.00489784	0.138599	-2.05611
COLLIS_PRKDC_SUBSTRATES	0.353788	-0.0111532	3.12175	0.00493512	0.138599	-2.06275
BOYLAN_MULTIPLE_MYELOMA_C_CLUSTER_UP	0.305562	0.014919	3.12119	0.00494159	0.138599	-2.0639
ZHENG_GLIOBLASTOMA_PLASTICITY_UP	0.257849	0.00924893	3.11324	0.00503462	0.138599	-2.08022
COATES_MACROPHAGE_M1_VS_M2_DN	-0.178396	0.00521186	-3.11301	0.00503736	0.138599	-2.0807
HUANG_GATA2_TARGETS_UP	-0.18638	-0.009933	-3.1101	0.00507193	0.138599	-2.08668
REACTOME_PTEN_REGULATION	0.217131	0.011203	3.10895	0.00508553	0.138599	-2.08903
REACTOME_SUMOYLATION_OF_DNA_REPLICATION_PROTEINS	0.423976	0.0191679	3.10823	0.00509422	0.138599	-2.09052
PID_AR_TF_PATHWAY	0.211018	0.0137037	3.10676	0.0051118	0.138599	-2.09354
ABDULRAHMAN_KIDNEY_CANCER_VHL_DN	-0.322503	-0.00842929	-3.10674	0.00511199	0.138599	-2.09357
BURTON_ADIPOGENESIS_PEAK_AT_24HR	0.467566	0.034862	3.10434	0.00514091	0.138599	-2.0985
HORIUCHI_WTAP_TARGETS_UP	-0.218995	-0.0161905	-3.10227	0.00516585	0.138599	-2.10274
BIOCARTA_TERT_PATHWAY	0.294193	0.0401696	3.09951	0.00519939	0.138599	-2.1084
REACTOME_ANTIVIRAL_MECHANISM_BY_IFN_STIMULATED_GENES	0.30053	-0.00265747	3.09889	0.00520688	0.138599	-2.10966
BONOME_OVARIAN_CANCER_POOR_SURVIVAL_DN	0.336905	-0.0108509	3.09678	0.00523274	0.138599	-2.11399
MORI_MATURE_B_LYMPHOCYTE_UP	-0.219331	-0.0046515	-3.09596	0.00524281	0.138599	-2.11568
TCGA_GLIOBLASTOMA_COPY_NUMBER_DN	-0.307572	0.0036655	-3.09435	0.00526263	0.138599	-2.11898
SCIAN_INVERSED_TARGETS_OF_TP53_AND_TP73_DN	-0.210983	0.00780382	-3.0918	0.00529407	0.138599	-2.12419
NABA_ECM_REGULATORS	-0.166742	-4.42815e-05	-3.08675	0.00535712	0.138599	-2.13454
REACTOME_MET_PROMOTES_CELL_MOTILITY	-0.24885	0.00967911	-3.08533	0.00537493	0.138599	-2.13745
GARGALOVIC_RESPONSE_TO_OXIDIZED_PHOSPHOLIPIDS_TURQUOISE_DN	0.407843	0.0155309	3.08532	0.00537501	0.138599	-2.13746
VARELA_ZMPSTE24_TARGETS_DN	-0.2292	-0.0199049	-3.08457	0.00538452	0.138599	-2.13901
REACTOME_LAMININ_INTERACTIONS	-0.354397	0.00622551	-3.08408	0.00539071	0.138599	-2.14001
REACTOME_GRB7_EVENTS_IN_ERBB2_SIGNALING	0.564663	-0.0147225	3.08143	0.00542426	0.138599	-2.14544
PUIFFE_INVASION_INHIBITED_BY_ASCITES_UP	0.272037	0.0141872	3.08096	0.00543022	0.138599	-2.1464
DAZARD_UV_RESPONSE_CLUSTER_G24	-0.221895	-0.00484452	-3.07994	0.00544317	0.138599	-2.14848
REACTOME_VITAMIN_B1_THIAMIN_METABOLISM	-0.388743	0.00824131	-3.07604	0.00549305	0.138823	-2.15645
JAATINEN_HEMATOPOIETIC_STEM_CELL_DN	-0.204508	-0.0107562	-3.07531	0.00550246	0.138823	-2.15795
ZHAN_MULTIPLE_MYELOMA_CD1_VS_CD2_UP	-0.287381	0.00568212	-3.07195	0.00554582	0.139278	-2.16481
BLUM_RESPONSE_TO_SALIRASIB_UP	-0.220829	0.00930256	-3.06111	0.00568807	0.142202	-2.18695
REACTOME_VLDLR_INTERNALISATION_AND_DEGRADATION	-0.306264	-0.00438471	-3.05734	0.00573837	0.14281	-2.19465
PID_INTEGRIN1_PATHWAY	-0.329985	-0.00135554	-3.05142	0.00581827	0.143308	-2.20673
NIKOLSKY_BREAST_CANCER_7Q21_Q22_AMPLICON	-0.287513	0.00565045	-3.05098	0.0058242	0.143308	-2.20762
MOOTHA_TCA	0.429096	0.0416938	3.05007	0.00583654	0.143308	-2.20947
YANG_BCL3_TARGETS_UP	0.183483	-0.00278501	3.04351	0.00592653	0.143652	-2.22284
SANA_TNF_SIGNALING_DN	-0.2195	0.00195018	-3.04329	0.00592962	0.143652	-2.22329
FUNG_IL2_SIGNALING_1	0.421824	-0.0188865	3.04286	0.0059355	0.143652	-2.22416
LAMB_CCND1_TARGETS	-0.410136	-0.0346145	-3.04047	0.00596873	0.143652	-2.22904
BIOCARTA_TUBBY_PATHWAY	-0.483634	-0.00309089	-3.03958	0.00598115	0.143652	-2.23085
KEGG_ECM_RECEPTOR_INTERACTION	-0.264883	-0.0128235	-3.03191	0.00608894	0.144507	-2.24645
GAVIN_FOXP3_TARGETS_CLUSTER_P6	0.37894	0.00938362	3.02964	0.00612125	0.144507	-2.25107
AKL_HTLV1_INFECTION_DN	-0.184175	-0.00234416	-3.02559	0.00617924	0.144507	-2.2593
WEINMANN_ADAPTATION_TO_HYPOXIA_DN	-0.299059	-0.026887	-3.02306	0.00621582	0.144507	-2.26446
NIKOLSKY_BREAST_CANCER_19Q13.1_AMPLICON	-0.335172	0.00500507	-3.01909	0.00627346	0.144507	-2.27252
ZHENG_FOXP3_TARGETS_IN_T_LYMPHOCYTE_DN	-0.262918	0.00437593	-3.01779	0.00629254	0.144507	-2.27517
REACTOME_PTK6_REGULATES_PROTEINS_INVOLVED_IN_RNA_PROCESSING	0.49711	-0.0341629	3.01467	0.00633839	0.144507	-2.2815
REACTOME_MITOCHONDRIAL_TRANSLATION	0.422865	0.0423392	3.0143	0.00634375	0.144507	-2.28224
MYLLYKANGAS_AMPLIFICATION_HOT_SPOT_7	-0.437563	0.0211769	-3.01238	0.00637214	0.144507	-2.28614
REACTOME_TGF_BETA_RECEPTOR_SIGNALING_ACTIVATES_SMADS	-0.245657	0.00612905	-3.01168	0.00638248	0.144507	-2.28755
CROMER_METASTASIS_UP	-0.243728	-0.0076184	-3.01099	0.00639283	0.144507	-2.28897
REACTOME_SIGNALING_BY_CYTOSOLIC_FGFR1_FUSION_MUTANTS	-0.26001	-0.0266614	-3.01028	0.00640337	0.144507	-2.29041
HEIDENBLAD_AMPLIFIED_IN_PANCREATIC_CANCER	-0.272985	-0.00359395	-3.01	0.00640759	0.144507	-2.29098
ROVERSI_GLIOMA_LOH_REGIONS	-0.212423	0.00885909	-3.00597	0.00646781	0.144507	-2.29914
WALLACE_PROSTATE_CANCER_DN	-0.436513	0.0147816	-3.00518	0.00647968	0.144507	-2.30074
SCHUETZ_BREAST_CANCER_DUCTAL_INVASIVE_UP	-0.258435	-0.00999427	-3.00435	0.00649219	0.144507	-2.30243
ITO_PTTG1_TARGETS_UP	-0.346484	-0.0252054	-3.00313	0.00651069	0.144507	-2.30491
BUYTAERT_PHOTODYNAMIC_THERAPY_STRESS_UP	-0.217002	0.00416913	-3.00178	0.00653109	0.144507	-2.30764
REACTOME_TRAIL_SIGNALING	0.356572	0.0219136	3.00058	0.00654929	0.144507	-2.31007
VALK_AML_CLUSTER_1	-0.233725	-0.0238274	-3.00035	0.00655288	0.144507	-2.31054
REACTOME_NF_KB_ACTIVATION_THROUGH_FADD_RIP_1_PATHWAY_MEDIATED_BY_CASPASE_8_AND_10	0.354518	-0.00595024	2.99932	0.00656848	0.144507	-2.31262
KEGG_CITRATE_CYCLE_TCA_CYCLE	0.399204	0.0172294	2.99735	0.0065986	0.144591	-2.31661
CREIGHTON_ENDOCRINE_THERAPY_RESISTANCE_5	-0.201617	-0.00851189	-2.99544	0.00662806	0.144598	-2.3205
ONDER_CDH1_SIGNALING_VIA_CTNNB1	-0.250674	-0.00244036	-2.99391	0.0066515	0.144598	-2.32358
REACTOME_RUNX1_REGULATES_EXPRESSION_OF_COMPONENTS_OF_TIGHT_JUNCTIONS	-0.678242	-0.0139615	-2.99074	0.00670066	0.145093	-2.33
CHEN_PDGF_TARGETS	-0.314322	-0.00182292	-2.98634	0.0067694	0.145533	-2.3389
REACTOME_POLB_DEPENDENT_LONG_PATCH_BASE_EXCISION_REPAIR	0.546132	0.0286791	2.98606	0.00677391	0.145533	-2.33948
ZWANG_CLASS_2_TRANSIENTLY_INDUCED_BY_EGF	-0.213332	-0.0217644	-2.97878	0.0068892	0.146863	-2.3542
PARK_APL_PATHOGENESIS_DN	-0.211589	-0.00851417	-2.97627	0.00692941	0.146863	-2.35927
REACTOME_COENZYME_A_BIOSYNTHESIS	0.467583	-0.015995	2.97467	0.00695514	0.146863	-2.3625
LY_AGING_PREMATURE_DN	0.503845	0.0159523	2.97413	0.00696386	0.146863	-2.36359
RODRIGUES_NTN1_AND_DCC_TARGETS	-0.286465	0.041704	-2.97335	0.00697644	0.146863	-2.36517
HALMOS_CEBPA_TARGETS_DN	-0.247714	0.00250539	-2.96876	0.00705101	0.146863	-2.37444
PID_RANBP2_PATHWAY	0.304822	-0.0081717	2.96817	0.00706061	0.146863	-2.37562
MIKKELSEN_MCV6_ICP_WITH_H3K4ME3_AND_H3K27ME3	-0.275436	0.000385143	-2.96762	0.00706969	0.146863	-2.37674
REACTOME_CARGO_CONCENTRATION_IN_THE_ER	-0.257547	0.0114519	-2.96722	0.00707611	0.146863	-2.37753
YAMAZAKI_TCEB3_TARGETS_UP	-0.254286	-0.0080407	-2.96419	0.00712596	0.147341	-2.38365
OHASHI_AURKA_TARGETS	0.422268	0.0211531	2.95863	0.00721827	0.148691	-2.39487
CHIARETTI_T_ALL_REFRACTORY_TO_THERAPY	-0.212556	0.00861229	-2.95402	0.00729561	0.149685	-2.40415
RAY_TARGETS_OF_P210_BCR_ABL_FUSION_DN	-0.29224	-0.0124854	-2.95196	0.00733049	0.149685	-2.40831
REACTOME_HDL_ASSEMBLY	-0.363701	-0.0248793	-2.95052	0.00735502	0.149685	-2.41122
MIKKELSEN_NPC_ICP_WITH_H3K27ME3	0.222644	-0.000753235	2.94932	0.00737538	0.149685	-2.41362
ALONSO_METASTASIS_DN	-0.213637	0.00422343	-2.94521	0.00744572	0.150263	-2.42189
YAGI_AML_FAB_MARKERS	-0.151186	5.02643e-05	-2.94447	0.00745851	0.150263	-2.42339
BAE_BRCA1_TARGETS_UP	-0.213229	-0.00493812	-2.94069	0.0075239	0.150468	-2.43099
OUYANG_PROSTATE_CANCER_MARKERS	-0.246227	0.010099	-2.93934	0.00754738	0.150468	-2.4337
REACTOME_INACTIVATION_OF_CDC42_AND_RAC1	0.445121	0.0174956	2.93796	0.00757159	0.150468	-2.43649
BIOCARTA_ETC_PATHWAY	0.356686	0.00269767	2.93758	0.00757811	0.150468	-2.43724
REACTOME_REGULATION_OF_PTEN_GENE_TRANSCRIPTION	0.240637	-0.00372307	2.93075	0.00769851	0.151911	-2.45096
ANASTASSIOU_MULTICANCER_INVASIVENESS_SIGNATURE	-0.331489	-0.0317819	-2.93033	0.00770601	0.151911	-2.45181
MYLLYKANGAS_AMPLIFICATION_HOT_SPOT_17	0.277388	0.00358884	2.92468	0.00780721	0.153356	-2.46317
REACTOME_DISEASES_OF_MISMATCH_REPAIR_MMR	0.624027	0.0158558	2.92198	0.0078558	0.153398	-2.46857
NABA_BASEMENT_MEMBRANES	-0.276107	0.0198918	-2.92147	0.00786516	0.153398	-2.4696
REACTOME_CLATHRIN_MEDIATED_ENDOCYTOSIS	-0.184349	0.00984826	-2.91497	0.00798375	0.154261	-2.48262
BIOCARTA_SARS_PATHWAY	0.462623	0.0201144	2.91338	0.00801308	0.154261	-2.48581
REACTOME_MITOTIC_SPINDLE_CHECKPOINT	0.355366	0.00560383	2.91323	0.00801584	0.154261	-2.48611
MCLACHLAN_DENTAL_CARIES_UP	-0.241345	0.00793307	-2.91292	0.00802157	0.154261	-2.48674
WEST_ADRENOCORTICAL_TUMOR_MARKERS_UP	0.375343	0.00518669	2.91112	0.00805493	0.154363	-2.49035
KASLER_HDAC7_TARGETS_1_DN	-0.295608	-0.0105137	-2.90453	0.008178	0.155913	-2.50354
LY_AGING_MIDDLE_DN	0.581444	0.0693005	2.90376	0.0081925	0.155913	-2.50508
KEGG_LYSINE_DEGRADATION	0.271093	-0.0128431	2.89999	0.00826402	0.156731	-2.51263
KIM_PTEN_TARGETS_UP	-0.295546	-0.00959795	-2.89616	0.00833698	0.156861	-2.52028
RICKMAN_TUMOR_DIFFERENTIATED_MODERATELY_VS_POORLY_DN	0.480144	0.000556509	2.89481	0.00836293	0.156861	-2.52298
SCHLOSSER_MYC_AND_SERUM_RESPONSE_SYNERGY	0.318005	0.0151063	2.89452	0.00836844	0.156861	-2.52355
MOREIRA_RESPONSE_TO_TSA_DN	0.256457	0.00173641	2.89263	0.00840502	0.156861	-2.52734
MELLMAN_TUT1_TARGETS_UP	0.289746	0.0122135	2.89138	0.00842924	0.156861	-2.52985
IVANOVA_HEMATOPOIESIS_STEM_CELL_LONG_TERM	-0.196433	0.000802867	-2.88772	0.00850035	0.156861	-2.53715
DONATO_CELL_CYCLE_TRETINOIN	-0.478373	-0.0127154	-2.88771	0.00850057	0.156861	-2.53717
LANDIS_BREAST_CANCER_PROGRESSION_UP	-0.21073	0.0163189	-2.88755	0.00850371	0.156861	-2.53749
ZHAN_MULTIPLE_MYELOMA_PR_DN	-0.226873	-0.0159191	-2.8861	0.00853205	0.156861	-2.54038
CREIGHTON_ENDOCRINE_THERAPY_RESISTANCE_3	-0.160132	-0.00055327	-2.883	0.00859298	0.156861	-2.54657
FARMER_BREAST_CANCER_CLUSTER_4	-0.441284	-0.0284835	-2.88278	0.00859723	0.156861	-2.547
REACTOME_CARGO_RECOGNITION_FOR_CLATHRIN_MEDIATED_ENDOCYTOSIS	-0.194538	0.00963072	-2.88055	0.00864148	0.156861	-2.55146
REACTOME_AMINO_ACID_TRANSPORT_ACROSS_THE_PLASMA_MEMBRANE	-0.294446	-0.0173459	-2.8803	0.00864642	0.156861	-2.55196
DOUGLAS_BMI1_TARGETS_DN	-0.164327	0.00963085	-2.87911	0.00867012	0.156861	-2.55433
GROSS_ELK3_TARGETS_UP	-0.200112	-0.0166613	-2.87638	0.00872451	0.157119	-2.55977
LENAOUR_DENDRITIC_CELL_MATURATION_DN	-0.177555	-0.00145159	-2.87553	0.00874155	0.157119	-2.56146
REACTOME_MISSPLICED_LRP5_MUTANTS_HAVE_ENHANCED_BETA_CATENIN_DEPENDENT_SIGNALING	0.439532	-0.0460445	2.87171	0.00881861	0.157988	-2.56909
REACTOME_CYTOSOLIC_IRON_SULFUR_CLUSTER_ASSEMBLY	0.42632	0.0242009	2.86775	0.00889897	0.158445	-2.57697
HOLLEMAN_PREDNISOLONE_RESISTANCE_B_ALL_DN	-0.314074	-0.0259646	-2.86761	0.00890175	0.158445	-2.57724
MAHAJAN_RESPONSE_TO_IL1A_DN	-0.190141	-0.0105141	-2.86303	0.00899584	0.159445	-2.58637
CROONQUIST_IL6_DEPRIVATION_DN	0.525469	0.0283514	2.85922	0.00907467	0.159445	-2.59395
REACTOME_HEME_BIOSYNTHESIS	0.357234	0.0168394	2.85627	0.00913609	0.159445	-2.5998
PID_TCR_PATHWAY	-0.195404	0.00891366	-2.85571	0.00914775	0.159445	-2.60091
ROSTY_CERVICAL_CANCER_PROLIFERATION_CLUSTER	0.521544	0.0369201	2.8547	0.00916903	0.159445	-2.60293
REACTOME_INTERACTIONS_OF_REV_WITH_HOST_CELLULAR_PROTEINS	0.410037	0.0213973	2.85441	0.00917511	0.159445	-2.6035
PID_ANTHRAX_PATHWAY	0.26363	-0.0206671	2.85283	0.00920828	0.159445	-2.60664
PACHER_TARGETS_OF_IGF1_AND_IGF2_UP	-0.278457	-0.0118322	-2.85225	0.00922058	0.159445	-2.60779
REACTOME_MTORC1_MEDIATED_SIGNALLING	0.306786	-0.024867	2.85033	0.00926119	0.159445	-2.61161
BHAT_ESR1_TARGETS_VIA_AKT1_DN	-0.260608	-0.00930454	-2.84877	0.00929419	0.159445	-2.6147
MISSIAGLIA_REGULATED_BY_METHYLATION_DN	0.473205	0.0196235	2.84739	0.00932369	0.159445	-2.61745
WANG_NEOPLASTIC_TRANSFORMATION_BY_CCND1_MYC	-0.281089	-0.00333044	-2.84718	0.00932806	0.159445	-2.61785
REACTOME_HOST_INTERACTIONS_WITH_INFLUENZA_FACTORS	0.352258	0.00563489	2.84687	0.00933481	0.159445	-2.61848
REACTOME_TRANSPORT_OF_MATURE_TRANSCRIPT_TO_CYTOPLASM	0.346282	0.0103401	2.84188	0.00944192	0.16057	-2.62838
KORKOLA_SEMINOMA_DN	-0.269264	0.0236477	-2.84013	0.00947968	0.16057	-2.63185
REACTOME_ASPARAGINE_N_LINKED_GLYCOSYLATION	-0.216797	0.0106575	-2.83974	0.00948822	0.16057	-2.63263
LIAN_LIPA_TARGETS_6M	-0.236108	0.0115991	-2.8379	0.00952819	0.160752	-2.63627
BIOCARTA_AMI_PATHWAY	-0.284645	0.00539	-2.83524	0.0095863	0.160875	-2.64155
PID_HEDGEHOG_GLI_PATHWAY	0.214409	0.0146873	2.83489	0.00959399	0.160875	-2.64224
PICCALUGA_ANGIOIMMUNOBLASTIC_LYMPHOMA_DN	-0.240154	-0.00496704	-2.83221	0.00965294	0.160967	-2.64756
REACTOME_HEDGEHOG_OFF_STATE	0.229167	0.00213318	2.82999	0.00970189	0.160967	-2.65195
REACTOME_BETA_OXIDATION_OF_BUTANOYL_COA_TO_ACETYL_COA	0.452427	-0.0355221	2.82924	0.00971857	0.160967	-2.65344
REACTOME_PROCESSING_OF_CAPPED_INTRONLESS_PRE_MRNA	0.359068	0.00655752	2.82815	0.00974276	0.160967	-2.65559
NABA_COLLAGENS	-0.313275	-0.0203027	-2.82577	0.00979574	0.160967	-2.66029
REACTOME_COLLAGEN_CHAIN_TRIMERIZATION	-0.313275	-0.0203027	-2.82577	0.00979574	0.160967	-2.66029
MATTIOLI_MULTIPLE_MYELOMA_WITH_14Q32_TRANSLOCATIONS	-0.29389	-0.0151586	-2.82405	0.00983423	0.160967	-2.6637
ZHAN_MULTIPLE_MYELOMA_CD2_UP	-0.1975	-0.0138505	-2.82202	0.00987996	0.160967	-2.66772
LINDGREN_BLADDER_CANCER_WITH_LOH_IN_CHR9Q	-0.183433	0.0033911	-2.82163	0.00988866	0.160967	-2.66848
REACTOME_UNFOLDED_PROTEIN_RESPONSE_UPR	-0.224847	0.018832	-2.82148	0.00989215	0.160967	-2.66879
REACTOME_DSCAM_INTERACTIONS	0.275938	0.0368096	2.81903	0.00994753	0.161391	-2.67363
KEGG_DILATED_CARDIOMYOPATHY	-0.200317	0.00397594	-2.81692	0.00999555	0.161646	-2.6778
RUTELLA_RESPONSE_TO_HGF_VS_CSF2RB_AND_IL4_UP	-0.170329	0.0016246	-2.81576	0.0100221	0.161646	-2.6801
KYNG_ENVIRONMENTAL_STRESS_RESPONSE_NOT_BY_4NQO_IN_WS	-0.243375	0.0120596	-2.81275	0.0100911	0.162117	-2.68605
NAKAYAMA_FRA2_TARGETS	-0.249499	0.0115505	-2.81174	0.0101142	0.162117	-2.68803
CROONQUIST_IL6_DEPRIVATION_UP	-0.322287	-0.0237233	-2.81064	0.0101397	0.162117	-2.69021
REACTOME_COLLAGEN_DEGRADATION	-0.293983	-0.00901337	-2.80781	0.0102052	0.162692	-2.6958
PLASARI_TGFB1_TARGETS_10HR_UP	-0.181658	0.00254399	-2.80232	0.0103337	0.164056	-2.70663
REACTOME_TELOMERE_EXTENSION_BY_TELOMERASE	0.611367	0.0282213	2.8016	0.0103505	0.164056	-2.70804
WEIGEL_OXIDATIVE_STRESS_BY_TBH_AND_H2O2	-0.205335	0.0033417	-2.79722	0.0104543	0.164234	-2.71669
REACTOME_NUCLEAR_IMPORT_OF_REV_PROTEIN	0.39644	0.0179301	2.79681	0.010464	0.164234	-2.71749
REACTOME_PROCESSING_OF_INTRONLESS_PRE_MRNAS	0.36392	0.0166774	2.79415	0.0105273	0.164234	-2.72272
REACTOME_GLYCOGEN_METABOLISM	-0.248756	0.0104115	-2.79176	0.0105847	0.164234	-2.72743
REACTOME_RESOLUTION_OF_SISTER_CHROMATID_COHESION	0.374371	0.00544564	2.79159	0.0105888	0.164234	-2.72776
PID_INSULIN_GLUCOSE_PATHWAY	0.283634	0.0153041	2.79111	0.0106005	0.164234	-2.72871
BEGUM_TARGETS_OF_PAX3_FOXO1_FUSION_UP	-0.206963	0.0148284	-2.79107	0.0106013	0.164234	-2.72878
XU_HGF_TARGETS_INDUCED_BY_AKT1_48HR_DN	0.371088	0.00927204	2.79056	0.0106137	0.164234	-2.72979
DORSEY_GAB2_TARGETS	-0.240765	-0.00194579	-2.78964	0.0106359	0.164234	-2.7316
ASTON_MAJOR_DEPRESSIVE_DISORDER_DN	-0.167092	0.00284309	-2.78862	0.0106605	0.164234	-2.7336
KORKOLA_SEMINOMA_UP	-0.30034	-0.0096972	-2.78689	0.0107026	0.164234	-2.73701
EINAV_INTERFERON_SIGNATURE_IN_CANCER	0.301724	-0.00356215	2.78617	0.01072	0.164234	-2.73842
SWEET_KRAS_ONCOGENIC_SIGNATURE	-0.153217	0.00147538	-2.78212	0.0108192	0.164567	-2.7464
TESAR_JAK_TARGETS_MOUSE_ES_D3_UP	0.325323	0.0146703	2.78066	0.0108552	0.164567	-2.74927
JOHANSSON_GLIOMAGENESIS_BY_PDGFB_DN	0.278367	0.00224708	2.77965	0.0108801	0.164567	-2.75125
REACTOME_RHO_GTPASES_ACTIVATE_FORMINS	0.316723	0.0043577	2.77881	0.0109008	0.164567	-2.7529
REACTOME_CD209_DC_SIGN_SIGNALING	-0.214805	0.00972135	-2.77738	0.0109363	0.164567	-2.75571
NGO_MALIGNANT_GLIOMA_1P_LOH	0.344349	-0.000160747	2.77345	0.0110343	0.164567	-2.76343
BIOCARTA_MYOSIN_PATHWAY	-0.319454	-0.00364781	-2.77267	0.0110538	0.164567	-2.76496
REACTOME_REGULATION_OF_INSULIN_LIKE_GROWTH_FACTOR_IGF_TRANSPORT_AND_UPTAKE_BY_INSULIN_LIKE_GROWTH_FACTOR_BINDING_PROTEINS_IGFBPS	-0.234775	-0.000722262	-2.77256	0.0110564	0.164567	-2.76517
BOYLAN_MULTIPLE_MYELOMA_C_CLUSTER_DN	-0.218917	0.00902615	-2.77141	0.0110854	0.164567	-2.76743
BIOCARTA_BARD1_PATHWAY	0.47577	0.0292921	2.77137	0.0110863	0.164567	-2.7675
EGUCHI_CELL_CYCLE_RB1_TARGETS	0.557221	0.0445139	2.7711	0.0110931	0.164567	-2.76803
REICHERT_MITOSIS_LIN9_TARGETS	0.478293	0.0246126	2.77077	0.0111015	0.164567	-2.76869
REACTOME_ACTIVATED_NTRK2_SIGNALS_THROUGH_RAS	-0.344797	-0.0149017	-2.76961	0.0111307	0.164567	-2.77096
BIOCARTA_ACE2_PATHWAY	-0.391738	-0.000931735	-2.76656	0.0112078	0.164898	-2.77693
THUM_MIR21_TARGETS_HEART_DISEASE_UP	-0.441419	-0.0128663	-2.76636	0.0112131	0.164898	-2.77734
MYLLYKANGAS_AMPLIFICATION_HOT_SPOT_18	-0.534017	-0.0133935	-2.76179	0.0113297	0.166169	-2.78629
KRIGE_RESPONSE_TO_TOSEDOSTAT_24HR_UP	-0.195252	-0.00426019	-2.7599	0.0113783	0.166438	-2.78999
MYLLYKANGAS_AMPLIFICATION_HOT_SPOT_12	0.365862	-0.000408196	2.75623	0.0114732	0.166943	-2.79718
REACTOME_SUMO_IS_PROTEOLYTICALLY_PROCESSED	0.264404	-0.0020062	2.75561	0.0114894	0.166943	-2.79839
REACTOME_EPIGENETIC_REGULATION_OF_GENE_EXPRESSION	0.247133	-0.0081947	2.75505	0.0115039	0.166943	-2.79948
DAVICIONI_TARGETS_OF_PAX_FOXO1_FUSIONS_DN	-0.20066	-0.00358174	-2.7535	0.0115443	0.167089	-2.80252
KEGG_GLYCOSAMINOGLYCAN_BIOSYNTHESIS_CHONDROITIN_SULFATE	-0.336753	-0.0132977	-2.74954	0.0116484	0.168152	-2.81028
REACTOME_PROCESSING_OF_CAPPED_INTRON_CONTAINING_PRE_MRNA	0.318923	0.00792243	2.74813	0.0116856	0.168186	-2.81304
CHNG_MULTIPLE_MYELOMA_HYPERPLOID_DN	-0.28429	0.026148	-2.74714	0.0117118	0.168186	-2.81497
HOLLEMAN_DAUNORUBICIN_ALL_DN	0.379177	0.00312295	2.74355	0.0118071	0.168779	-2.82197
REACTOME_PHOSPHORYLATION_OF_EMI1	0.615635	0.0193344	2.74327	0.0118145	0.168779	-2.82252
KYNG_DNA_DAMAGE_UP	-0.158916	-0.00897123	-2.73921	0.0119236	0.169407	-2.83046
DASU_IL6_SIGNALING_SCAR_DN	-0.324036	-0.00576656	-2.73728	0.0119756	0.169407	-2.83422
REACTOME_EXPORT_OF_VIRAL_RIBONUCLEOPROTEINS_FROM_NUCLEUS	0.378216	0.0177129	2.73716	0.0119789	0.169407	-2.83446
KORKOLA_EMBRYONAL_CARCINOMA_UP	-0.336393	0.00727924	-2.73706	0.0119817	0.169407	-2.83466
REACTOME_ER_QUALITY_CONTROL_COMPARTMENT_ERQC	-0.334249	-0.00434419	-2.7341	0.012062	0.169892	-2.84043
ODONNELL_METASTASIS_DN	0.252614	0.0100814	2.73335	0.0120824	0.169892	-2.84189
ULE_SPLICING_VIA_NOVA2	0.163157	-0.00218785	2.73239	0.0121086	0.169892	-2.84376
BAFNA_MUC4_TARGETS_UP	-0.392222	-0.0204176	-2.73013	0.0121707	0.170327	-2.84818
PID_RETINOIC_ACID_PATHWAY	0.233812	0.0203477	2.72379	0.0123458	0.17151	-2.86051
GARCIA_TARGETS_OF_FLI1_AND_DAX1_DN	0.322092	0.00638563	2.72297	0.0123688	0.17151	-2.86212
REACTOME_IMMUNOREGULATORY_INTERACTIONS_BETWEEN_A_LYMPHOID_AND_A_NON_LYMPHOID_CELL	-0.181249	-0.0112987	-2.72204	0.0123947	0.17151	-2.86393
REACTOME_DDX58_IFIH1_MEDIATED_INDUCTION_OF_INTERFERON_ALPHA_BETA	0.191475	0.00887219	2.72145	0.012411	0.17151	-2.86507
GALIE_TUMOR_STEMNESS_GENES	-0.440319	0.0149199	-2.72141	0.0124123	0.17151	-2.86516
REACTOME_ORGANELLE_BIOGENESIS_AND_MAINTENANCE	0.169118	-0.00485472	2.71983	0.0124565	0.17151	-2.86822
HOLLEMAN_PREDNISOLONE_RESISTANCE_ALL_UP	0.294963	-0.00365721	2.71868	0.012489	0.17151	-2.87047
NIKOLSKY_BREAST_CANCER_8Q12_Q22_AMPLICON	-0.183213	-0.00731209	-2.71675	0.0125432	0.17151	-2.87421
BIOCARTA_TH1TH2_PATHWAY	-0.235981	0.00614756	-2.71554	0.0125777	0.17151	-2.87658
REACTOME_MISMATCH_REPAIR	0.548129	0.0147567	2.71486	0.0125967	0.17151	-2.87789
VERHAAK_AML_WITH_NPM1_MUTATED_UP	-0.151288	0.00509737	-2.71481	0.0125982	0.17151	-2.87799
REACTOME_SUMOYLATION_OF_SUMOYLATION_PROTEINS	0.358384	0.0120538	2.71357	0.0126335	0.171566	-2.8804
REACTOME_SUMOYLATION_OF_UBIQUITINYLATION_PROTEINS	0.280492	0.0151281	2.71129	0.0126987	0.172026	-2.88484
JOHANSSON_BRAIN_CANCER_EARLY_VS_LATE_UP	0.400604	0.0402218	2.70792	0.0127952	0.172383	-2.89138
GU_PDEF_TARGETS_DN	-0.20657	0.00326384	-2.70771	0.0128014	0.172383	-2.8918
PID_CD8_TCR_PATHWAY	-0.181676	0.00321615	-2.7071	0.012819	0.172383	-2.89298
BIOCARTA_SAM68_PATHWAY	0.491111	-0.0191413	2.7037	0.0129174	0.173283	-2.89958
ENGELMANN_CANCER_PROGENITORS_DN	0.1405	-0.00779494	2.69968	0.0130346	0.174332	-2.90737
NAKAYAMA_SOFT_TISSUE_TUMORS_PCA2_UP	0.353429	0.005399	2.69885	0.0130591	0.174332	-2.90899
MCCABE_HOXC6_TARGETS_CANCER_DN	-0.224585	0.00538842	-2.69266	0.0132419	0.175939	-2.92098
CUI_TCF21_TARGETS_DN	-0.234063	-0.000460314	-2.69261	0.0132434	0.175939	-2.92108
REACTOME_NUCLEOBASE_BIOSYNTHESIS	0.427821	0.0327146	2.68739	0.0133995	0.17643	-2.93118
KIM_GLIS2_TARGETS_UP	-0.21013	-0.000849541	-2.68634	0.0134313	0.17643	-2.93322
WU_HBX_TARGETS_2_UP	0.198044	0.00474698	2.68519	0.0134658	0.17643	-2.93543
PEART_HDAC_PROLIFERATION_CLUSTER_DN	0.268452	-0.00165101	2.68495	0.0134732	0.17643	-2.93591
KIM_RESPONSE_TO_TSA_AND_DECITABINE_UP	-0.168699	-0.0122093	-2.68488	0.0134754	0.17643	-2.93605
PETRETTO_CARDIAC_HYPERTROPHY	-0.234829	-0.00363808	-2.68468	0.0134812	0.17643	-2.93642
MORI_LARGE_PRE_BII_LYMPHOCYTE_DN	-0.240235	0.00372686	-2.67967	0.0136336	0.17643	-2.94611
LI_WILMS_TUMOR_VS_FETAL_KIDNEY_1_DN	0.339538	0.00928504	2.67881	0.0136601	0.17643	-2.94778
BIOCARTA_DICER_PATHWAY	-0.620942	-0.00461964	-2.67767	0.0136951	0.17643	-2.94998
WONG_ENDOMETRIAL_CANCER_LATE	-0.471009	-0.0111769	-2.67726	0.0137074	0.17643	-2.95076
MAGRANGEAS_MULTIPLE_MYELOMA_IGLL_VS_IGLK_UP	-0.181671	0.0144494	-2.67687	0.0137196	0.17643	-2.95152
FRASOR_RESPONSE_TO_SERM_OR_FULVESTRANT_DN	0.401632	0.0092472	2.67674	0.0137236	0.17643	-2.95178
DEURIG_T_CELL_PROLYMPHOCYTIC_LEUKEMIA_DN	-0.154585	0.00600882	-2.67501	0.0137768	0.17643	-2.95511
OUILLETTE_CLL_13Q14_DELETION_DN	-0.204286	-0.0090219	-2.67468	0.0137869	0.17643	-2.95574
REACTOME_INTERLEUKIN_36_PATHWAY	-0.351379	-0.00436779	-2.67392	0.0138105	0.17643	-2.95721
ZHAN_MULTIPLE_MYELOMA_SUBGROUPS	0.38665	0.0268174	2.67219	0.0138644	0.17643	-2.96057
KEGG_RIG_I_LIKE_RECEPTOR_SIGNALING_PATHWAY	0.20453	0.0212453	2.67218	0.0138646	0.17643	-2.96058
WESTON_VEGFA_TARGETS_6HR	-0.222896	-0.00973212	-2.67207	0.013868	0.17643	-2.96079
BIOCARTA_RAN_PATHWAY	0.533698	0.0089751	2.67111	0.0138979	0.17643	-2.96265
WHITFIELD_CELL_CYCLE_M_G1	0.202152	0.00772285	2.67019	0.0139266	0.17643	-2.96442
NIKOLSKY_BREAST_CANCER_10Q22_AMPLICON	0.391744	-0.00741688	2.66865	0.0139745	0.17643	-2.96738
FARMER_BREAST_CANCER_CLUSTER_2	0.500313	0.0227399	2.66828	0.0139861	0.17643	-2.9681
SCHAEFFER_PROSTATE_DEVELOPMENT_AND_CANCER_BOX6_DN	-0.453484	0.00194965	-2.66585	0.0140625	0.176987	-2.97279
BROCKE_APOPTOSIS_REVERSED_BY_IL6	-0.162228	0.00929503	-2.66348	0.0141372	0.177001	-2.97735
VALK_AML_CLUSTER_11	-0.231133	-0.00446538	-2.66288	0.0141562	0.177001	-2.97851
NOJIMA_SFRP2_TARGETS_DN	0.223454	0.00634437	2.66276	0.0141601	0.177001	-2.97874
KANG_DOXORUBICIN_RESISTANCE_UP	0.530372	0.0411396	2.65557	0.0143896	0.178732	-2.99258
LIANG_SILENCED_BY_METHYLATION_DN	0.489669	0.0193083	2.65548	0.0143926	0.178732	-2.99276
HOLLEMAN_VINCRISTINE_RESISTANCE_ALL_UP	-0.257614	-0.0200796	-2.65537	0.014396	0.178732	-2.99297
MAHADEVAN_IMATINIB_RESISTANCE_DN	-0.304521	-0.000386903	-2.65201	0.0145045	0.17893	-2.99943
BIOCARTA_CTCF_PATHWAY	-0.188698	0.0176057	-2.65132	0.014527	0.17893	-3.00076
TURASHVILI_BREAST_LOBULAR_CARCINOMA_VS_DUCTAL_NORMAL_UP	-0.24065	-0.0115339	-2.65129	0.014528	0.17893	-3.00082
REACTOME_GENE_AND_PROTEIN_EXPRESSION_BY_JAK_STAT_SIGNALING_AFTER_INTERLEUKIN_12_STIMULATION	0.24294	-0.0287305	2.65035	0.0145585	0.17893	-3.00263
CHEMNITZ_RESPONSE_TO_PROSTAGLANDIN_E2_UP	0.326212	0.0162137	2.64985	0.0145747	0.17893	-3.00358
HOFFMANN_LARGE_TO_SMALL_PRE_BII_LYMPHOCYTE_UP	0.399527	0.019725	2.6436	0.0147797	0.181043	-3.0156
KORKOLA_EMBRYONAL_CARCINOMA_DN	-0.25221	0.0110295	-2.64234	0.0148214	0.18115	-3.01803
REACTOME_ATTACHMENT_OF_GPI_ANCHOR_TO_UPAR	-0.379716	0.0162319	-2.63931	0.0149217	0.181695	-3.02382
LIU_CDX2_TARGETS_DN	-0.331181	0.00993758	-2.63848	0.0149496	0.181695	-3.02543
REACTOME_NICOTINAMIDE_SALVAGING	0.269415	0.00268443	2.63801	0.014965	0.181695	-3.02632
REACTOME_COMPLEX_I_BIOGENESIS	0.271381	0.00221746	2.63477	0.0150736	0.181903	-3.03254
GAUSSMANN_MLL_AF4_FUSION_TARGETS_A_DN	-0.207181	0.0147818	-2.63361	0.0151126	0.181903	-3.03476
GU_PDEF_TARGETS_UP	-0.223767	0.00904518	-2.63318	0.0151272	0.181903	-3.03559
DACOSTA_UV_RESPONSE_VIA_ERCC3_TTD_DN	-0.236904	0.00183144	-2.63309	0.0151304	0.181903	-3.03577
LIAN_LIPA_TARGETS_3M	-0.253065	0.00604053	-2.63223	0.0151593	0.181903	-3.03741
MORI_LARGE_PRE_BII_LYMPHOCYTE_UP	0.459438	0.0322041	2.63082	0.015207	0.181903	-3.04011
POMEROY_MEDULLOBLASTOMA_PROGNOSIS_DN	0.300076	-0.00834914	2.63004	0.0152335	0.181903	-3.04161
REACTOME_SIGNALING_BY_ACTIVIN	-0.266147	-0.00557101	-2.62965	0.0152468	0.181903	-3.04236
GOBERT_OLIGODENDROCYTE_DIFFERENTIATION_UP	0.330962	0.0151934	2.62615	0.015366	0.182928	-3.04905
KEGG_THYROID_CANCER	0.209599	0.0124665	2.62442	0.0154253	0.183238	-3.05236
REACTOME_NOTCH2_INTRACELLULAR_DOMAIN_REGULATES_TRANSCRIPTION	-0.293811	0.0122268	-2.62001	0.0155776	0.184648	-3.0608
LIU_IL13_MEMORY_MODEL_DN	-0.370686	-0.0304892	-2.616	0.0157171	0.185902	-3.06847
FURUKAWA_DUSP6_TARGETS_PCI35_DN	0.379362	0.0254431	2.61155	0.0158734	0.187226	-3.07696
ZWANG_EGF_PERSISTENTLY_DN	0.224643	-0.000978418	2.61003	0.015927	0.187226	-3.07986
REACTOME_TRNA_PROCESSING	0.289516	0.00652158	2.60991	0.0159312	0.187226	-3.08008
IRITANI_MAD1_TARGETS_DN	0.366137	0.011896	2.60477	0.0161143	0.188857	-3.0899
MATTIOLI_MGUS_VS_PCL	0.271068	-0.0079946	2.60409	0.0161387	0.188857	-3.0912
REACTOME_CREATION_OF_C4_AND_C2_ACTIVATORS	-0.296334	-0.0173715	-2.60313	0.016173	0.188857	-3.09302
BAKKER_FOXO3_TARGETS_UP	-0.236301	-0.00814667	-2.60094	0.016252	0.189218	-3.0972
DING_LUNG_CANCER_EXPRESSION_BY_COPY_NUMBER	-0.206849	-0.00706285	-2.59949	0.0163044	0.189218	-3.09996
KYNG_ENVIRONMENTAL_STRESS_RESPONSE_DN	-0.292954	0.00353784	-2.59912	0.0163177	0.189218	-3.10066
REACTOME_MITOTIC_METAPHASE_AND_ANAPHASE	0.319407	0.00924833	2.59734	0.0163823	0.189218	-3.10406
REACTOME_INTEGRIN_CELL_SURFACE_INTERACTIONS	-0.234497	-0.00358711	-2.59672	0.0164047	0.189218	-3.10523
ROY_WOUND_BLOOD_VESSEL_UP	-0.225521	-0.0125798	-2.59542	0.0164523	0.189218	-3.10771
IKEDA_MIR30_TARGETS_UP	-0.201044	0.00461033	-2.59351	0.016522	0.189218	-3.11134
NADLER_OBESITY_DN	0.221669	0.00646358	2.59345	0.0165242	0.189218	-3.11145
CALVET_IRINOTECAN_SENSITIVE_VS_REVERTED_UP	0.420951	-0.013596	2.59306	0.0165385	0.189218	-3.1122
MEINHOLD_OVARIAN_CANCER_LOW_GRADE_DN	0.297608	0.0102727	2.59235	0.0165646	0.189218	-3.11355
KEGG_HYPERTROPHIC_CARDIOMYOPATHY_HCM	-0.197756	0.0105238	-2.59159	0.0165925	0.189218	-3.11499
REACTOME_N_GLYCAN_TRIMMING_IN_THE_ER_AND_CALNEXIN_CALRETICULIN_CYCLE	-0.278932	0.00343044	-2.59054	0.0166311	0.189218	-3.11699
KIM_RESPONSE_TO_TSA_AND_DECITABINE_DN	0.332511	-0.024673	2.58969	0.0166623	0.189218	-3.1186
KAUFFMANN_MELANOMA_RELAPSE_UP	0.454233	0.0313683	2.58775	0.0167341	0.189218	-3.12228
KEGG_GALACTOSE_METABOLISM	0.254888	0.0157491	2.58725	0.0167527	0.189218	-3.12324
MORI_IMMATURE_B_LYMPHOCYTE_DN	0.44476	0.0296025	2.58717	0.0167558	0.189218	-3.1234
BRUNO_HEMATOPOIESIS	-0.203725	0.00873633	-2.58587	0.0168042	0.189218	-3.12587
REACTOME_MITOTIC_PROPHASE	0.261802	0.00500647	2.58536	0.0168232	0.189218	-3.12684
DUTERTRE_ESTRADIOL_RESPONSE_24HR_DN	-0.172493	-0.00361969	-2.58428	0.0168634	0.189283	-3.12889
BURTON_ADIPOGENESIS_3	0.439276	0.0190603	2.58224	0.0169399	0.189348	-3.13277
MCBRYAN_PUBERTAL_BREAST_3_4WK_UP	-0.147434	0.0050727	-2.58153	0.0169664	0.189348	-3.13411
NIKOLSKY_BREAST_CANCER_20P13_AMPLICON	0.304276	0.00519227	2.58059	0.0170017	0.189348	-3.13589
REACTOME_CELL_CELL_COMMUNICATION	-0.149739	-0.00221039	-2.58045	0.0170069	0.189348	-3.13615
CHIARADONNA_NEOPLASTIC_TRANSFORMATION_KRAS_CDC25_DN	-0.290184	-0.0153425	-2.57888	0.0170663	0.189374	-3.13914
REACTOME_E2F_ENABLED_INHIBITION_OF_PRE_REPLICATION_COMPLEX_FORMATION	0.459675	0.0265364	2.5784	0.0170841	0.189374	-3.14003
DEMAGALHAES_AGING_UP	-0.220065	0.00115417	-2.57763	0.0171134	0.189374	-3.1415
RODRIGUES_DCC_TARGETS_DN	-0.191201	-0.00557771	-2.57674	0.017147	0.189374	-3.14318
ZIRN_TRETINOIN_RESPONSE_UP	-0.32478	-0.00252827	-2.57389	0.0172556	0.189779	-3.1486
REACTOME_G1_S_SPECIFIC_TRANSCRIPTION	0.379871	-0.00713808	2.57355	0.0172685	0.189779	-3.14923
REACTOME_DEFECTIVE_TPR_MAY_CONFER_SUSCEPTIBILITY_TOWARDS_THYROID_PAPILLARY_CARCINOMA_TPC	0.339448	0.0168442	2.57306	0.0172871	0.189779	-3.15016
WU_ALZHEIMER_DISEASE_UP	-0.309407	0.0295709	-2.56946	0.0174255	0.190917	-3.157
REACTOME_NEPHRIN_FAMILY_INTERACTIONS	-0.230092	0.00408763	-2.56627	0.0175484	0.191786	-3.16302
REACTOME_NEUTROPHIL_DEGRANULATION	-0.136531	-0.00231547	-2.5656	0.0175746	0.191786	-3.16429
BROWNE_HCMV_INFECTION_4HR_UP	0.182333	0.0100045	2.5627	0.0176876	0.192542	-3.16978
TCGA_GLIOBLASTOMA_COPY_NUMBER_UP	-0.165369	0.00592767	-2.56203	0.0177138	0.192542	-3.17105
LE_EGR2_TARGETS_UP	0.337024	0.0172417	2.55824	0.0178625	0.192891	-3.17821
EPPERT_HSC_R	-0.15966	0.00981623	-2.5578	0.0178798	0.192891	-3.17904
REACTOME_MUCOPOLYSACCHARIDOSES	-0.450006	0.0169004	-2.55695	0.0179134	0.192891	-3.18065
ONDER_CDH1_TARGETS_1_UP	-0.235574	-0.0110676	-2.55573	0.0179618	0.192891	-3.18296
FIGUEROA_AML_METHYLATION_CLUSTER_1_DN	0.197301	-0.00972449	2.55507	0.0179877	0.192891	-3.18419
BIOCARTA_ERYTH_PATHWAY	-0.309022	-0.0100188	-2.55498	0.0179913	0.192891	-3.18436
LIANG_HEMATOPOIESIS_STEM_CELL_NUMBER_SMALL_VS_HUGE_DN	0.166297	0.014334	2.55474	0.018001	0.192891	-3.18483
HASLINGER_B_CLL_WITH_MUTATED_VH_GENES	-0.249003	0.00302304	-2.55357	0.0180474	0.192891	-3.18703
ZHAN_MULTIPLE_MYELOMA_CD1_UP	-0.265165	-0.0143126	-2.55321	0.0180616	0.192891	-3.1877
REACTOME_CARBOXYTERMINAL_POST_TRANSLATIONAL_MODIFICATIONS_OF_TUBULIN	0.20686	0.0146622	2.55209	0.0181065	0.192996	-3.18983
BOYLAN_MULTIPLE_MYELOMA_PCA3_UP	-0.182274	0.010259	-2.54983	0.0181967	0.193582	-3.19408
GABRIELY_MIR21_TARGETS	-0.210917	-0.00387962	-2.54537	0.0183764	0.194808	-3.20249
DANG_REGULATED_BY_MYC_DN	-0.138323	-0.00450184	-2.54521	0.0183828	0.194808	-3.20279
FARMER_BREAST_CANCER_CLUSTER_6	-0.288645	0.0071787	-2.54035	0.0185806	0.196267	-3.21195
BIOCARTA_PKC_PATHWAY	-0.338243	0.0224367	-2.53964	0.0186098	0.196267	-3.21329
REACTOME_TRAF6_MEDIATED_IRF7_ACTIVATION	0.180167	0.0110599	2.53921	0.0186276	0.196267	-3.21411
LY_AGING_OLD_DN	0.403581	0.0222867	2.53795	0.018679	0.196434	-3.21647
KONDO_PROSTATE_CANCER_HCP_WITH_H3K27ME3	-0.136294	0.0172427	-2.52984	0.0190152	0.198921	-3.23172
MANALO_HYPOXIA_DN	0.352384	0.0104353	2.52909	0.0190464	0.198921	-3.23312
MASSARWEH_TAMOXIFEN_RESISTANCE_UP	-0.150269	-0.00540047	-2.52756	0.0191108	0.198921	-3.23601
PHESSE_TARGETS_OF_APC_AND_MBD2_DN	-0.34941	-0.0114595	-2.52621	0.0191674	0.198921	-3.23854
MORI_IMMATURE_B_LYMPHOCYTE_UP	-0.233073	-0.0124496	-2.52619	0.0191681	0.198921	-3.23857
BOYAULT_LIVER_CANCER_SUBCLASS_G1_DN	-0.194197	-0.0101865	-2.52606	0.0191737	0.198921	-3.23882
BRACHAT_RESPONSE_TO_METHOTREXATE_UP	-0.268317	0.00551621	-2.52491	0.0192221	0.198921	-3.24097
REACTOME_HDACS_DEACETYLATE_HISTONES	0.283061	-0.00508774	2.52383	0.019268	0.198921	-3.24301
ZHANG_INTERFERON_RESPONSE	0.327007	-0.018819	2.52357	0.0192786	0.198921	-3.24348
BRUECKNER_TARGETS_OF_MIRLET7A3_DN	-0.168993	0.00315303	-2.52286	0.0193087	0.198921	-3.24482
KEGG_COMPLEMENT_AND_COAGULATION_CASCADES	-0.21325	-0.0276286	-2.52275	0.0193134	0.198921	-3.24502
IGARASHI_ATF4_TARGETS_DN	-0.235516	0.0016235	-2.52073	0.0193995	0.199434	-3.24882
WONG_ADULT_TISSUE_STEM_MODULE	-0.171094	-0.00387592	-2.51851	0.0194939	0.200031	-3.25297
REACTOME_PRE_NOTCH_PROCESSING_IN_GOLGI	-0.249109	-0.000909431	-2.51729	0.0195464	0.200196	-3.25527
NAKAYAMA_SOFT_TISSUE_TUMORS_PCA1_UP	-0.289296	0.0125484	-2.51099	0.0198183	0.201958	-3.26707
WHITFIELD_CELL_CYCLE_G2	0.267171	0.0064485	2.51027	0.0198495	0.201958	-3.26841
YU_MYC_TARGETS_UP	0.435968	0.0215196	2.50997	0.0198626	0.201958	-3.26898
DURCHDEWALD_SKIN_CARCINOGENESIS_DN	-0.153353	0.00164043	-2.50991	0.0198653	0.201958	-3.26909
ZWANG_CLASS_1_TRANSIENTLY_INDUCED_BY_EGF	-0.153816	0.00129295	-2.50894	0.0199072	0.20201	-3.27089
KEGG_OTHER_GLYCAN_DEGRADATION	-0.366036	-0.013538	-2.50805	0.019946	0.202031	-3.27256
BIOCARTA_NPC_PATHWAY	0.45437	0.00122582	2.50547	0.0200591	0.202601	-3.27738
ONKEN_UVEAL_MELANOMA_DN	-0.156025	-0.00311028	-2.50458	0.0200984	0.202601	-3.27906
WONG_EMBRYONIC_STEM_CELL_CORE	0.330222	0.0239054	2.50425	0.0201128	0.202601	-3.27966
ZHU_SKIL_TARGETS_DN	0.459536	-0.0325165	2.49967	0.0203156	0.203654	-3.28823
MOSERLE_IFNA_RESPONSE	0.338343	-0.0241211	2.49944	0.0203256	0.203654	-3.28865
REACTOME_CLEC7A_DECTIN_1_INDUCES_NFAT_ACTIVATION	-0.229735	0.031793	-2.49938	0.0203284	0.203654	-3.28877
HESS_TARGETS_OF_HOXA9_AND_MEIS1_DN	-0.198594	0.00775897	-2.49704	0.0204326	0.204326	-3.29313
GAVIN_FOXP3_TARGETS_CLUSTER_T4	-0.139561	0.00526721	-2.49238	0.0206421	0.205579	-3.30183
FRIDMAN_IMMORTALIZATION_DN	-0.215173	-0.000261667	-2.49133	0.0206891	0.205579	-3.30377
TOMIDA_METASTASIS_DN	-0.280736	-0.0191165	-2.49097	0.0207056	0.205579	-3.30445
ZHOU_CELL_CYCLE_GENES_IN_IR_RESPONSE_6HR	0.460335	0.0176924	2.49093	0.0207074	0.205579	-3.30453
ZHANG_TARGETS_OF_EWSR1_FLI1_FUSION	-0.154045	0.0010348	-2.48866	0.0208105	0.206216	-3.30876
STEARMAN_LUNG_CANCER_EARLY_VS_LATE_UP	-0.167485	-0.00498614	-2.48624	0.0209207	0.206216	-3.31327
SANSOM_APC_MYC_TARGETS	0.14947	0.00676452	2.48589	0.0209366	0.206216	-3.31391
BROWNE_HCMV_INFECTION_10HR_UP	-0.196251	0.00996953	-2.48495	0.0209795	0.206216	-3.31566
SENESE_HDAC2_TARGETS_DN	-0.228557	-0.0105214	-2.48416	0.0210158	0.206216	-3.31714
PICCALUGA_ANGIOIMMUNOBLASTIC_LYMPHOMA_UP	-0.225119	-0.0205371	-2.48405	0.021021	0.206216	-3.31735
SCIAN_CELL_CYCLE_TARGETS_OF_TP53_AND_TP73_DN	0.44886	0.0255617	2.48323	0.0210585	0.206216	-3.31887
LEE_EARLY_T_LYMPHOCYTE_DN	-0.209131	-0.00517434	-2.48258	0.0210884	0.206216	-3.32008
REACTOME_CELL_CYCLE_CHECKPOINTS	0.309805	0.0136808	2.48082	0.0211694	0.206216	-3.32335
SCHAEFFER_PROSTATE_DEVELOPMENT_12HR_UP	-0.168713	-0.00667604	-2.48016	0.0212	0.206216	-3.32457
BLUM_RESPONSE_TO_SALIRASIB_DN	0.327734	0.00751265	2.47975	0.0212191	0.206216	-3.32534
EBAUER_TARGETS_OF_PAX3_FOXO1_FUSION_DN	-0.176344	0.00441342	-2.47969	0.0212216	0.206216	-3.32544
BIOCARTA_PLATELETAPP_PATHWAY	-0.303935	0.00163197	-2.47708	0.0213427	0.206574	-3.3303
BURTON_ADIPOGENESIS_8	-0.203965	0.00780507	-2.47573	0.0214058	0.206574	-3.33281
REACTOME_POST_CHAPERONIN_TUBULIN_FOLDING_PATHWAY	0.320605	0.0320763	2.47479	0.0214495	0.206574	-3.33455
CAMPS_COLON_CANCER_COPY_NUMBER_DN	-0.194428	-0.00867466	-2.47342	0.0215136	0.206574	-3.33709
REACTOME_SIGNALING_BY_EGFR	-0.177788	0.00541495	-2.47312	0.0215277	0.206574	-3.33765
REACTOME_ERCC6_CSB_AND_EHMT2_G9A_POSITIVELY_REGULATE_RRNA_EXPRESSION	0.328883	0.0100985	2.47293	0.0215369	0.206574	-3.33801
HUANG_DASATINIB_RESISTANCE_UP	-0.1877	0.00121852	-2.47227	0.0215679	0.206574	-3.33924
SMITH_LIVER_CANCER	0.231305	0.00400404	2.47195	0.0215828	0.206574	-3.33983
KONG_E2F3_TARGETS	0.441486	0.0190347	2.47166	0.0215963	0.206574	-3.34036
PASINI_SUZ12_TARGETS_DN	-0.153038	-0.00143037	-2.46806	0.0217666	0.207556	-3.34705
REACTOME_BASE_EXCISION_REPAIR_AP_SITE_FORMATION	0.248325	-0.0131796	2.46789	0.0217745	0.207556	-3.34736
DAUER_STAT3_TARGETS_DN	0.274933	0.000575713	2.46626	0.021852	0.207646	-3.35039
WOOD_EBV_EBNA1_TARGETS_UP	0.154373	0.00051328	2.46567	0.02188	0.207646	-3.35148
REACTOME_BASIGIN_INTERACTIONS	-0.236802	-0.0249333	-2.46531	0.0218973	0.207646	-3.35215
REACTOME_INTERLEUKIN_RECEPTOR_SHC_SIGNALING	-0.209681	0.0123912	-2.464	0.0219595	0.207878	-3.35457
SOTIRIOU_BREAST_CANCER_GRADE_1_VS_3_UP	0.440341	0.0355041	2.45631	0.02233	0.209895	-3.36881
POS_RESPONSE_TO_HISTAMINE_UP	0.247453	-0.010859	2.45555	0.0223667	0.209895	-3.37021
DELPUECH_FOXO3_TARGETS_UP	-0.209866	0.00578227	-2.45303	0.0224898	0.209895	-3.37488
LUCAS_HNF4A_TARGETS_DN	-0.305533	-0.00175694	-2.45185	0.0225472	0.209895	-3.37705
REACTOME_EGFR_DOWNREGULATION	-0.18434	0.00228867	-2.45173	0.022553	0.209895	-3.37727
CERVERA_SDHB_TARGETS_2	-0.154378	-0.00531943	-2.45136	0.0225715	0.209895	-3.37797
WHITESIDE_CISPLATIN_RESISTANCE_UP	0.265834	-0.0126854	2.45102	0.0225881	0.209895	-3.37859
PID_INTEGRIN3_PATHWAY	-0.27688	0.000454905	-2.45054	0.0226116	0.209895	-3.37948
SIMBULAN_PARP1_TARGETS_DN	0.399505	0.0319687	2.45008	0.0226341	0.209895	-3.38032
REACTOME_SUMOYLATION_OF_IMMUNE_RESPONSE_PROTEINS	0.28473	0.0192806	2.45001	0.0226376	0.209895	-3.38045
GAUSSMANN_MLL_AF4_FUSION_TARGETS_D_DN	-0.327103	-0.0558428	-2.44941	0.0226671	0.209895	-3.38156
MCBRYAN_PUBERTAL_TGFB1_TARGETS_UP	-0.195664	-0.0112836	-2.44802	0.0227356	0.209895	-3.38413
DIAZ_CHRONIC_MEYLOGENOUS_LEUKEMIA_DN	-0.179341	0.00301536	-2.44722	0.0227751	0.209895	-3.38561
REACTOME_ROS_AND_RNS_PRODUCTION_IN_PHAGOCYTES	-0.297373	-0.018497	-2.44663	0.0228043	0.209895	-3.3867
MAHADEVAN_IMATINIB_RESISTANCE_UP	-0.219406	0.0130986	-2.44646	0.0228129	0.209895	-3.38702
KATSANOU_ELAVL1_TARGETS_UP	-0.181125	-0.00478151	-2.44585	0.022843	0.209895	-3.38814
AMIT_SERUM_RESPONSE_120_MCF10A	-0.189684	-0.00468575	-2.44525	0.0228727	0.209895	-3.38924
MISHRA_CARCINOMA_ASSOCIATED_FIBROBLAST_UP	-0.240184	-0.0104895	-2.44503	0.0228834	0.209895	-3.38964
CAFFAREL_RESPONSE_TO_THC_24HR_3_DN	0.301555	0.00224167	2.44445	0.0229123	0.209895	-3.39072
CHYLA_CBFA2T3_TARGETS_UP	-0.131969	-0.00313494	-2.44398	0.0229358	0.209895	-3.39159
REACTOME_MRNA_SPLICING	0.288131	0.00820547	2.44294	0.0229876	0.21002	-3.39351
LEE_AGING_NEOCORTEX_DN	0.148749	-0.00437619	2.44203	0.0230328	0.210084	-3.39518
LIANG_HEMATOPOIESIS_STEM_CELL_NUMBER_SMALL_VS_HUGE_UP	-0.203937	0.00379692	-2.43779	0.0232458	0.21093	-3.403
KEGG_VIBRIO_CHOLERAE_INFECTION	-0.240193	-0.0115739	-2.43638	0.0233166	0.21093	-3.40559
PETROVA_ENDOTHELIUM_LYMPHATIC_VS_BLOOD_DN	-0.153718	0.0167176	-2.43624	0.0233238	0.21093	-3.40585
BIOCARTA_ACETAMINOPHEN_PATHWAY	0.402313	0.0457917	2.4362	0.0233259	0.21093	-3.40593
TAKEDA_TARGETS_OF_NUP98_HOXA9_FUSION_3D_DN	-0.2933	0.00173354	-2.436	0.023336	0.21093	-3.4063
ODONNELL_TFRC_TARGETS_UP	-0.139868	0.00143715	-2.43504	0.0233843	0.21093	-3.40805
FERRARI_RESPONSE_TO_FENRETINIDE_UP	-0.249135	0.0269761	-2.43485	0.0233941	0.21093	-3.40841
TORCHIA_TARGETS_OF_EWSR1_FLI1_FUSION_DN	-0.129306	2.33678e-05	-2.43379	0.023448	0.21107	-3.41037
CLASPER_LYMPHATIC_VESSELS_DURING_METASTASIS_UP	-0.362614	0.00596996	-2.43158	0.0235604	0.211723	-3.41443
REACTOME_PASSIVE_TRANSPORT_BY_AQUAPORINS	-0.24275	-0.000465816	-2.43085	0.0235974	0.211723	-3.41577
GRAHAM_CML_QUIESCENT_VS_NORMAL_QUIESCENT_UP	0.270156	0.00246577	2.42933	0.0236753	0.211947	-3.41856
DUTERTRE_ESTRADIOL_RESPONSE_24HR_UP	0.359245	0.0113208	2.42886	0.0236996	0.211947	-3.41944
REACTOME_NUCLEOSOME_ASSEMBLY	0.415356	0.00252223	2.42764	0.0237619	0.211971	-3.42167
TING_SILENCED_BY_DICER	-0.230382	-0.00417624	-2.42719	0.0237852	0.211971	-3.4225
LI_WILMS_TUMOR_ANAPLASTIC_UP	0.443626	0.0149464	2.42656	0.0238179	0.211971	-3.42367
OISHI_CHOLANGIOMA_STEM_CELL_LIKE_DN	-0.137856	-0.000343469	-2.42546	0.0238745	0.212132	-3.42568
REACTOME_NUCLEAR_ENVELOPE_BREAKDOWN	0.275276	0.00610722	2.42042	0.0241358	0.214108	-3.43493
WEST_ADRENOCORTICAL_CARCINOMA_VS_ADENOMA_UP	0.273594	0.0149424	2.41889	0.0242158	0.214141	-3.43774
REACTOME_SYNTHESIS_OF_PC	-0.228532	-0.00017653	-2.41886	0.0242174	0.214141	-3.43779
PEDERSEN_TARGETS_OF_611CTF_ISOFORM_OF_ERBB2	-0.214635	0.00520495	-2.41429	0.0244575	0.215634	-3.44617
REACTOME_PKMTS_METHYLATE_HISTONE_LYSINES	0.203689	-0.00854722	2.41416	0.0244646	0.215634	-3.44642
FORTSCHEGGER_PHF8_TARGETS_UP	-0.128287	-0.00381382	-2.41258	0.0245482	0.215809	-3.44931
VISALA_AGING_LYMPHOCYTE_UP	-0.27175	0.00477947	-2.41193	0.0245826	0.215809	-3.4505
SCHLESINGER_METHYLATED_DE_NOVO_IN_CANCER	0.152518	0.00734665	2.41156	0.0246022	0.215809	-3.45118
GRANDVAUX_IRF3_TARGETS_UP	0.32679	0.012323	2.41006	0.0246821	0.216108	-3.45393
REACTOME_NEGATIVE_REGULATION_OF_NMDA_RECEPTOR_MEDIATED_NEURONAL_TRANSMISSION	0.210462	-0.00508407	2.40944	0.0247149	0.216108	-3.45506
BIOCARTA_WNT_LRP6_PATHWAY	0.360796	0.0134987	2.40841	0.0247698	0.216245	-3.45694
DAVICIONI_RHABDOMYOSARCOMA_PAX_FOXO1_FUSION_DN	-0.230363	-0.0249211	-2.40629	0.0248837	0.216611	-3.46083
REACTOME_TP53_REGULATES_TRANSCRIPTION_OF_GENES_INVOLVED_IN_G2_CELL_CYCLE_ARREST	0.308831	-0.0105243	2.40537	0.0249329	0.216611	-3.46251
REACTOME_TRANSPORT_OF_MATURE_MRNAS_DERIVED_FROM_INTRONLESS_TRANSCRIPTS	0.303459	0.00948817	2.40411	0.0250006	0.216611	-3.46481
VECCHI_GASTRIC_CANCER_EARLY_UP	0.273768	0.0102691	2.40241	0.0250923	0.216611	-3.46791
CHARAFE_BREAST_CANCER_LUMINAL_VS_BASAL_DN	-0.141337	0.00260413	-2.40203	0.0251131	0.216611	-3.46862
BHAT_ESR1_TARGETS_NOT_VIA_AKT1_DN	-0.222683	-0.0094421	-2.4014	0.0251472	0.216611	-3.46977
PID_INTEGRIN4_PATHWAY	-0.286461	0.0305276	-2.40122	0.0251569	0.216611	-3.47009
CROONQUIST_NRAS_SIGNALING_DN	0.451151	0.0263158	2.40107	0.0251651	0.216611	-3.47037
REACTOME_DNA_STRAND_ELONGATION	0.483395	0.010416	2.40105	0.0251662	0.216611	-3.47041
VETTER_TARGETS_OF_PRKCA_AND_ETS1_UP	-0.234317	-0.000821436	-2.3983	0.0253155	0.217251	-3.47542
CHOI_ATL_ACUTE_STAGE	-0.334833	0.012194	-2.39771	0.0253477	0.217251	-3.4765
YAMASHITA_LIVER_CANCER_WITH_EPCAM_DN	0.265522	-0.0571932	2.39597	0.0254429	0.217251	-3.47968
SASAKI_ADULT_T_CELL_LEUKEMIA	0.175072	-0.0063154	2.39553	0.025467	0.217251	-3.48048
REACTOME_VITAMIN_B5_PANTOTHENATE_METABOLISM	0.309232	0.000579254	2.39497	0.0254974	0.217251	-3.4815
ZHOU_CELL_CYCLE_GENES_IN_IR_RESPONSE_24HR	0.405096	0.0293773	2.39444	0.0255266	0.217251	-3.48247
REACTOME_METABOLISM_OF_NON_CODING_RNA	0.319757	0.0176874	2.39392	0.0255551	0.217251	-3.48341
LU_EZH2_TARGETS_UP	0.179763	-0.00366127	2.3939	0.0255566	0.217251	-3.48346
REACTOME_MITOTIC_PROMETAPHASE	0.298804	0.00271208	2.39302	0.0256047	0.217323	-3.48505
GUTIERREZ_MULTIPLE_MYELOMA_UP	0.278895	0.00291964	2.39121	0.0257048	0.217438	-3.48836
WHITFIELD_CELL_CYCLE_LITERATURE	0.461148	0.0174846	2.39121	0.0257049	0.217438	-3.48837
REACTOME_SIGNALING_BY_RECEPTOR_TYROSINE_KINASES	-0.124699	0.00491402	-2.3906	0.0257383	0.217438	-3.48947
WHITEFORD_PEDIATRIC_CANCER_MARKERS	0.408624	0.0275758	2.38992	0.0257763	0.217438	-3.49072
PRAMOONJAGO_SOX4_TARGETS_DN	0.232573	0.0118634	2.38809	0.0258779	0.217711	-3.49405
BIOCARTA_VITCB_PATHWAY	-0.381043	-0.00410733	-2.38677	0.0259515	0.217711	-3.49646
CLAUS_PGR_POSITIVE_MENINGIOMA_DN	-0.243072	-0.0175454	-2.38667	0.0259568	0.217711	-3.49663
KEGG_SMALL_CELL_LUNG_CANCER	-0.162598	0.0178469	-2.38498	0.0260516	0.217711	-3.49972
REACTOME_NUCLEAR_PORE_COMPLEX_NPC_DISASSEMBLY	0.308556	0.0156679	2.38413	0.0260991	0.217711	-3.50126
NAKAMURA_ADIPOGENESIS_EARLY_DN	-0.233116	0.0193494	-2.384	0.0261065	0.217711	-3.5015
VERHAAK_GLIOBLASTOMA_MESENCHYMAL	-0.196797	0.00485243	-2.38334	0.0261434	0.217711	-3.5027
MARSON_BOUND_BY_E2F4_UNSTIMULATED	0.281847	0.0101603	2.38266	0.0261816	0.217711	-3.50393
GAUSSMANN_MLL_AF4_FUSION_TARGETS_C_UP	-0.141363	-0.00111002	-2.38132	0.0262569	0.217711	-3.50637
KANG_IMMORTALIZED_BY_TERT_UP	-0.120122	0.00105907	-2.38115	0.0262668	0.217711	-3.50669
REACTOME_METAL_ION_SLC_TRANSPORTERS	-0.221217	0.00415487	-2.38107	0.0262711	0.217711	-3.50683
WOOD_EBV_EBNA1_TARGETS_DN	-0.159964	0.00547796	-2.38019	0.0263206	0.217711	-3.50842
PUJANA_BREAST_CANCER_WITH_BRCA1_MUTATED_UP	0.396693	0.0149886	2.38014	0.0263232	0.217711	-3.50851
PARK_OSTEOBLAST_DIFFERENTIATION_BY_PHENYLAMIL_DN	-0.321698	-0.0243303	-2.378	0.0264445	0.217856	-3.5124
TAKEDA_TARGETS_OF_NUP98_HOXA9_FUSION_6HR_DN	-0.161555	-0.000599309	-2.37772	0.0264605	0.217856	-3.51291
FUNG_IL2_TARGETS_WITH_STAT5_BINDING_SITES	0.337428	-0.0428278	2.37692	0.0265058	0.217856	-3.51436
REACTOME_INTERACTIONS_OF_VPR_WITH_HOST_CELLULAR_PROTEINS	0.309096	0.0103811	2.37582	0.0265689	0.217856	-3.51637
BOSCO_ALLERGEN_INDUCED_TH2_ASSOCIATED_MODULE	-0.1365	0.0188201	-2.37539	0.0265932	0.217856	-3.51715
LI_WILMS_TUMOR_VS_FETAL_KIDNEY_1_UP	-0.177598	-0.00675462	-2.37512	0.0266085	0.217856	-3.51763
REACTOME_SUMOYLATION_OF_DNA_DAMAGE_RESPONSE_AND_REPAIR_PROTEINS	0.235469	0.00922081	2.37485	0.0266242	0.217856	-3.51813
JEON_SMAD6_TARGETS_DN	0.301041	0.0140182	2.37289	0.026736	0.217856	-3.52168
SCIBETTA_KDM5B_TARGETS_DN	0.237303	-0.00704415	2.37283	0.0267394	0.217856	-3.52179
CHEBOTAEV_GR_TARGETS_UP	-0.171823	-0.00722793	-2.37281	0.0267408	0.217856	-3.52183
LI_DCP2_BOUND_MRNA	0.264049	0.0177918	2.37078	0.0268575	0.217856	-3.52552
CADWELL_ATG16L1_TARGETS_DN	0.155947	0.00231029	2.36876	0.0269741	0.217856	-3.52918
MOOTHA_MITOCHONDRIA	0.19202	0.00885073	2.36833	0.0269989	0.217856	-3.52996
REACTOME_CELL_JUNCTION_ORGANIZATION	-0.151668	-0.0021803	-2.36782	0.0270281	0.217856	-3.53087
KYNG_NORMAL_AGING_DN	-0.263613	0.01311	-2.36724	0.0270619	0.217856	-3.53193
REACTOME_VLDL_CLEARANCE	0.415862	0.0084744	2.36718	0.0270652	0.217856	-3.53204
REACTOME_TRANSPORT_TO_THE_GOLGI_AND_SUBSEQUENT_MODIFICATION	-0.217706	0.0168864	-2.36655	0.0271019	0.217856	-3.53318
NIKOLSKY_BREAST_CANCER_14Q22_AMPLICON	-0.292095	0.00405184	-2.36644	0.0271085	0.217856	-3.53339
YOSHIMURA_MAPK8_TARGETS_DN	-0.121421	-0.00130066	-2.36589	0.0271403	0.217856	-3.53438
TAKAYAMA_BOUND_BY_AR	-0.277531	0.0289363	-2.36548	0.0271643	0.217856	-3.53513
PID_SHP2_PATHWAY	-0.191679	0.00115371	-2.36494	0.0271953	0.217856	-3.53609
REACTOME_SIGNALING_BY_HEDGEHOG	0.142931	-0.00096156	2.36465	0.0272122	0.217856	-3.53662
CHUANG_OXIDATIVE_STRESS_RESPONSE_DN	0.329584	0.00749352	2.36385	0.0272593	0.217857	-3.53808
REACTOME_TRANSPORT_OF_NUCLEOTIDE_SUGARS	-0.329073	0.000323494	-2.36224	0.0273533	0.217857	-3.54099
BOYLAN_MULTIPLE_MYELOMA_C_D_DN	-0.118446	0.000345623	-2.36192	0.0273719	0.217857	-3.54157
ABRAMSON_INTERACT_WITH_AIRE	0.385723	-0.015164	2.36125	0.0274112	0.217857	-3.54278
TONKS_TARGETS_OF_RUNX1_RUNX1T1_FUSION_MONOCYTE_DN	-0.18568	-0.00125511	-2.36121	0.0274136	0.217857	-3.54286
ENK_UV_RESPONSE_EPIDERMIS_UP	0.148512	0.00363893	2.36059	0.02745	0.217857	-3.54398
REACTOME_M_PHASE	0.270021	0.00635231	2.35863	0.0275651	0.218455	-3.54752
WANG_METASTASIS_OF_BREAST_CANCER_ESR1_UP	0.404966	0.021655	2.35397	0.0278416	0.22005	-3.55596
KAYO_CALORIE_RESTRICTION_MUSCLE_UP	-0.203704	-0.00195821	-2.35373	0.0278559	0.22005	-3.55639
REACTOME_E2F_MEDIATED_REGULATION_OF_DNA_REPLICATION	0.332373	0.00621051	2.35281	0.0279107	0.22005	-3.55805
ZHENG_FOXP3_TARGETS_UP	-0.195994	0.0196016	-2.35196	0.0279611	0.22005	-3.55958
KEGG_ONE_CARBON_POOL_BY_FOLATE	0.31399	0.0146346	2.35187	0.0279663	0.22005	-3.55973
REACTOME_VESICLE_MEDIATED_TRANSPORT	-0.139481	0.00816309	-2.34906	0.0281351	0.220343	-3.56482
COULOUARN_TEMPORAL_TGFB1_SIGNATURE_DN	-0.157208	-0.0189982	-2.34856	0.0281649	0.220343	-3.56572
RUTELLA_RESPONSE_TO_HGF_DN	-0.138173	0.00878657	-2.34826	0.0281829	0.220343	-3.56625
KEGG_GLYCOSPHINGOLIPID_BIOSYNTHESIS_LACTO_AND_NEOLACTO_SERIES	-0.242059	0.0113269	-2.34759	0.0282234	0.220343	-3.56747
SHEDDEN_LUNG_CANCER_GOOD_SURVIVAL_A4	-0.130035	-0.00355125	-2.34722	0.0282454	0.220343	-3.56813
MANALO_HYPOXIA_UP	-0.211452	-0.0016799	-2.34666	0.0282798	0.220343	-3.56915
IVANOVA_HEMATOPOIESIS_MATURE_CELL	-0.126	-0.00190069	-2.34612	0.0283118	0.220343	-3.57011
TIEN_INTESTINE_PROBIOTICS_24HR_UP	0.232147	0.00790069	2.3451	0.0283739	0.220343	-3.57196
REACTOME_GAMMA_CARBOXYLATION_HYPUSINE_FORMATION_AND_ARYLSULFATASE_ACTIVATION	-0.217517	0.00570994	-2.3443	0.0284224	0.220343	-3.5734
REACTOME_NONHOMOLOGOUS_END_JOINING_NHEJ	0.236989	0.0146744	2.34396	0.028443	0.220343	-3.57402
HELLER_SILENCED_BY_METHYLATION_DN	-0.161497	0.00140163	-2.34336	0.0284793	0.220343	-3.57509
WU_APOPTOSIS_BY_CDKN1A_VIA_TP53	0.418047	0.0238707	2.34282	0.0285122	0.220343	-3.57607
LI_CISPLATIN_RESISTANCE_DN	-0.210481	-0.0142938	-2.34262	0.0285245	0.220343	-3.57643
REACTOME_ORC1_REMOVAL_FROM_CHROMATIN	0.322915	0.0306945	2.33945	0.0287177	0.221299	-3.58213
CAIRO_HEPATOBLASTOMA_CLASSES_DN	-0.192765	-0.00801598	-2.33864	0.0287676	0.221299	-3.5836
REACTOME_ACTIVATION_OF_THE_AP_1_FAMILY_OF_TRANSCRIPTION_FACTORS	0.325612	-0.0156717	2.33862	0.0287689	0.221299	-3.58364
MARIADASON_RESPONSE_TO_BUTYRATE_CURCUMIN_SULINDAC_TSA_2	-0.514447	-0.0498881	-2.33498	0.0289927	0.222368	-3.59018
REACTOME_SMAD2_SMAD3:SMAD4_HETEROTRIMER_REGULATES_TRANSCRIPTION	-0.22027	0.00668534	-2.33485	0.0290011	0.222368	-3.59042
GENTLES_LEUKEMIC_STEM_CELL_UP	-0.217443	0.00407911	-2.33439	0.0290291	0.222368	-3.59124
PID_ILK_PATHWAY	0.18045	0.00253701	2.33335	0.0290936	0.222405	-3.59311
TIEN_INTESTINE_PROBIOTICS_2HR_UP	-0.19842	-0.00825444	-2.3327	0.0291336	0.222405	-3.59427
REACTOME_RUNX1_REGULATES_TRANSCRIPTION_OF_GENES_INVOLVED_IN_WNT_SIGNALING	-0.454071	0.0242275	-2.33236	0.0291553	0.222405	-3.5949
YEMELYANOV_GR_TARGETS_DN	0.23939	0.0336347	2.32998	0.0293031	0.222504	-3.59917
REACTOME_METABOLISM_OF_RNA	0.244859	0.0119208	2.32938	0.0293405	0.222504	-3.60024
KEGG_LYSOSOME	-0.277553	-0.0314472	-2.32924	0.0293493	0.222504	-3.6005
PHONG_TNF_RESPONSE_VIA_P38_PARTIAL	-0.14687	-0.00395894	-2.32877	0.0293786	0.222504	-3.60134
TAVOR_CEBPA_TARGETS_UP	-0.169513	-0.00608532	-2.32867	0.029385	0.222504	-3.60152
GAUSSMANN_MLL_AF4_FUSION_TARGETS_F_DN	-0.154973	0.00730484	-2.32825	0.029411	0.222504	-3.60227
SWEET_LUNG_CANCER_KRAS_DN	-0.153637	-0.00599307	-2.32655	0.029518	0.223007	-3.60533
SANSOM_APC_TARGETS_UP	0.135315	0.000575125	2.32518	0.0296039	0.223349	-3.60779
MOLENAAR_TARGETS_OF_CCND1_AND_CDK4_DN	0.387899	0.019199	2.32319	0.0297296	0.22399	-3.61136
PAL_PRMT5_TARGETS_UP	0.247733	0.0114695	2.32159	0.0298305	0.224443	-3.61422
REACTOME_CELL_CYCLE_MITOTIC	0.270446	0.00635578	2.3179	0.0300659	0.224825	-3.62084
REACTOME_PTK6_EXPRESSION	0.429632	0.00419776	2.31765	0.0300813	0.224825	-3.62128
FOSTER_TOLERANT_MACROPHAGE_UP	-0.146412	0.00357758	-2.31741	0.0300967	0.224825	-3.62171
REACTOME_TETRAHYDROBIOPTERIN_BH4_SYNTHESIS_RECYCLING_SALVAGE_AND_REGULATION	0.226911	-0.00268281	2.31737	0.0300997	0.224825	-3.62179
KORKOLA_CHORIOCARCINOMA	-0.369653	0.00618256	-2.31733	0.0301017	0.224825	-3.62185
REACTOME_REGULATION_OF_FZD_BY_UBIQUITINATION	-0.306767	-0.00553799	-2.31683	0.030134	0.224825	-3.62275
REACTOME_HDL_REMODELING	-0.311538	0.0205641	-2.31586	0.0301959	0.224825	-3.62448
MOREAUX_B_LYMPHOCYTE_MATURATION_BY_TACI_DN	0.328115	0.0251063	2.31567	0.0302082	0.224825	-3.62483
REACTOME_CELL_CYCLE	0.268241	0.00700021	2.31499	0.0302519	0.224845	-3.62604
MORI_PRE_BI_LYMPHOCYTE_UP	0.341789	0.014127	2.31354	0.0303452	0.225151	-3.62864
REACTOME_TCF_DEPENDENT_SIGNALING_IN_RESPONSE_TO_WNT	0.132816	0.00604597	2.31162	0.030469	0.225151	-3.63207
TANG_SENESCENCE_TP53_TARGETS_UP	-0.244929	-0.0154925	-2.31156	0.0304731	0.225151	-3.63218
MORI_PLASMA_CELL_DN	-0.208441	0.00271194	-2.31075	0.0305252	0.225151	-3.63362
ONDER_CDH1_TARGETS_3_UP	-0.313581	0.0133914	-2.31023	0.0305589	0.225151	-3.63455
REACTOME_PHOSPHORYLATION_SITE_MUTANTS_OF_CTNNB1_ARE_NOT_TARGETED_TO_THE_PROTEASOME_BY_THE_DESTRUCTION_COMPLEX	0.271057	-0.0109996	2.30998	0.0305753	0.225151	-3.63501
BEGUM_TARGETS_OF_PAX3_FOXO1_FUSION_AND_PAX3	-0.373763	-0.00126439	-2.30991	0.0305796	0.225151	-3.63512
REACTOME_RUNX3_REGULATES_CDKN1A_TRANSCRIPTION	-0.282858	-0.00544811	-2.30799	0.0307047	0.225648	-3.63857
REACTOME_GALACTOSE_CATABOLISM	0.340098	0.0284657	2.30746	0.0307391	0.225648	-3.63951
REACTOME_CHONDROITIN_SULFATE_DERMATAN_SULFATE_METABOLISM	-0.257115	-0.0177369	-2.30699	0.0307701	0.225648	-3.64036
REACTOME_THE_ACTIVATION_OF_ARYLSULFATASES	-0.313247	0.00393495	-2.30417	0.030954	0.226487	-3.64538
FERRANDO_T_ALL_WITH_MLL_ENL_FUSION_DN	0.260628	0.00779795	2.30095	0.0311663	0.226487	-3.65113
WELCSH_BRCA1_TARGETS_DN	0.230064	-0.0013979	2.30058	0.0311909	0.226487	-3.6518
REACTOME_PTK6_REGULATES_RHO_GTPASES_RAS_GTPASE_AND_MAP_KINASES	0.208242	0.00349158	2.29938	0.0312701	0.226487	-3.65393
FISCHER_G2_M_CELL_CYCLE	0.322132	0.016943	2.29916	0.0312843	0.226487	-3.65431
KEGG_NON_HOMOLOGOUS_END_JOINING	0.306988	0.0112514	2.29907	0.0312902	0.226487	-3.65447
TANG_SENESCENCE_TP53_TARGETS_DN	0.387361	0.0166353	2.29904	0.0312922	0.226487	-3.65453
IIZUKA_LIVER_CANCER_EARLY_RECURRENCE	-0.212657	-0.00082325	-2.29874	0.0313122	0.226487	-3.65507
WANG_SMARCE1_TARGETS_UP	-0.199572	-0.0121801	-2.29866	0.0313179	0.226487	-3.65522
REACTOME_TRANSPORT_OF_THE_SLBP_DEPENDANT_MATURE_MRNA	0.311085	0.00538602	2.2981	0.0313545	0.226487	-3.6562
PID_SYNDECAN_1_PATHWAY	-0.218748	-0.0124451	-2.29733	0.0314058	0.226487	-3.65758
BRACHAT_RESPONSE_TO_METHOTREXATE_DN	0.186378	-0.0124159	2.29686	0.0314372	0.226487	-3.65842
BIOCARTA_IL3_PATHWAY	-0.255482	-0.00202575	-2.2965	0.0314612	0.226487	-3.65906
NIKOLSKY_BREAST_CANCER_22Q13_AMPLICON	0.277607	0.0282348	2.29598	0.0314959	0.226487	-3.65999
LEE_EARLY_T_LYMPHOCYTE_UP	0.360812	0.01716	2.29526	0.0315439	0.226487	-3.66127
RUTELLA_RESPONSE_TO_HGF_UP	-0.149814	0.0023573	-2.29506	0.0315569	0.226487	-3.66162
YAO_TEMPORAL_RESPONSE_TO_PROGESTERONE_CLUSTER_16	-0.208641	-0.0143263	-2.29465	0.0315846	0.226487	-3.66236
REACTOME_GLUTAMATE_NEUROTRANSMITTER_RELEASE_CYCLE	-0.220851	0.0071413	-2.29339	0.0316691	0.226741	-3.66461
REACTOME_POSITIVE_EPIGENETIC_REGULATION_OF_RRNA_EXPRESSION	0.251498	-0.000800622	2.29281	0.0317076	0.226741	-3.66563
MCCLUNG_CREB1_TARGETS_DN	-0.128349	0.0166421	-2.29227	0.0317437	0.226741	-3.66658
PID_TRAIL_PATHWAY	0.199821	0.00882648	2.29061	0.0318554	0.227243	-3.66954
HOSHIDA_LIVER_CANCER_LATE_RECURRENCE_UP	-0.128608	0.00543006	-2.28957	0.0319257	0.22745	-3.67139
REACTOME_O_GLYCOSYLATION_OF_TSR_DOMAIN_CONTAINING_PROTEINS	-0.224321	0.00478725	-2.28785	0.0320421	0.227984	-3.67446
FRASOR_TAMOXIFEN_RESPONSE_DN	-0.205179	0.00743414	-2.28466	0.0322583	0.229226	-3.68011
REACTOME_PECAM1_INTERACTIONS	-0.213574	0.00281688	-2.28309	0.0323659	0.229694	-3.68291
LIU_CDX2_TARGETS_UP	-0.145309	-0.0256496	-2.28208	0.0324347	0.229752	-3.6847
BERENJENO_TRANSFORMED_BY_RHOA_FOREVER_DN	-0.208575	0.000553625	-2.28174	0.0324577	0.229752	-3.68529
KOINUMA_COLON_CANCER_MSI_UP	0.349596	0.0149553	2.28084	0.0325198	0.229753	-3.6869
GRAHAM_NORMAL_QUIESCENT_VS_NORMAL_DIVIDING_DN	0.412983	0.0116772	2.27817	0.0327032	0.229753	-3.69163
PEDERSEN_METASTASIS_BY_ERBB2_ISOFORM_4	-0.141718	0.00583321	-2.27683	0.0327957	0.229753	-3.694
HO_LIVER_CANCER_VASCULAR_INVASION	0.243491	-0.0207245	2.27663	0.03281	0.229753	-3.69437
VERRECCHIA_RESPONSE_TO_TGFB1_C6	-0.375269	-0.0387139	-2.27574	0.0328712	0.229753	-3.69593
KEGG_SNARE_INTERACTIONS_IN_VESICULAR_TRANSPORT	-0.262188	0.0120258	-2.2755	0.032888	0.229753	-3.69636
REACTOME_MITOTIC_G1_G1_S_PHASES	0.268888	0.015301	2.27542	0.0328934	0.229753	-3.6965
REACTOME_SIALIC_ACID_METABOLISM	-0.213642	0.00837171	-2.27532	0.0329005	0.229753	-3.69668
RAMJAUN_APOPTOSIS_BY_TGFB1_VIA_MAPK1_UP	-0.385328	0.00698644	-2.27393	0.0329972	0.229753	-3.69915
REACTOME_CALNEXIN_CALRETICULIN_CYCLE	-0.267302	-0.0205941	-2.27357	0.0330221	0.229753	-3.69978
BIOCARTA_MITR_PATHWAY	0.346313	0.00635296	2.2732	0.0330477	0.229753	-3.70043
BIOCARTA_ERAD_PATHWAY	-0.14029	0.0124769	-2.27302	0.0330604	0.229753	-3.70076
JACKSON_DNMT1_TARGETS_DN	0.26095	0.0441274	2.27225	0.0331144	0.229753	-3.70213
KYNG_ENVIRONMENTAL_STRESS_RESPONSE_UP	-0.150634	0.0251102	-2.27183	0.0331434	0.229753	-3.70286
WAMUNYOKOLI_OVARIAN_CANCER_LMP_DN	-0.178164	-0.0202794	-2.2717	0.0331524	0.229753	-3.70309
REACTOME_TFAP2A_ACTS_AS_A_TRANSCRIPTIONAL_REPRESSOR_DURING_RETINOIC_ACID_INDUCED_CELL_DIFFERENTIATION	0.401579	0.0144955	2.27046	0.0332394	0.229753	-3.70529
REACTOME_PI5P_REGULATES_TP53_ACETYLATION	0.261375	0.00996497	2.27033	0.0332481	0.229753	-3.70551
KRIGE_RESPONSE_TO_TOSEDOSTAT_6HR_UP	-0.117598	0.00410125	-2.27024	0.0332549	0.229753	-3.70569
REACTOME_APEX1_INDEPENDENT_RESOLUTION_OF_AP_SITES_VIA_THE_SINGLE_NUCLEOTIDE_REPLACEMENT_PATHWAY	0.417184	-0.0208143	2.26923	0.0333257	0.229753	-3.70747
REACTOME_DNA_DAMAGE_RECOGNITION_IN_GG_NER	0.220016	0.00699615	2.26917	0.0333299	0.229753	-3.70758
VECCHI_GASTRIC_CANCER_ADVANCED_VS_EARLY_UP	-0.213476	-0.0103299	-2.26829	0.0333917	0.229753	-3.70913
CHEOK_RESPONSE_TO_HD_MTX_UP	-0.252728	0.00126743	-2.26709	0.0334762	0.229753	-3.71126
ODONNELL_TARGETS_OF_MYC_AND_TFRC_DN	0.380105	0.00895279	2.26707	0.0334772	0.229753	-3.71128
BAELDE_DIABETIC_NEPHROPATHY_DN	-0.140999	-0.0124663	-2.26647	0.0335196	0.229753	-3.71234
WANG_METHYLATED_IN_BREAST_CANCER	-0.242828	0.0138078	-2.26574	0.033571	0.229753	-3.71363
AMIT_EGF_RESPONSE_20_MCF10A	-0.271041	-0.0124342	-2.26502	0.0336219	0.229753	-3.7149
LEE_LIVER_CANCER_MYC_UP	0.172601	-0.0109832	2.26498	0.0336251	0.229753	-3.71498
TRAYNOR_RETT_SYNDROM_UP	0.172389	0.00286133	2.26495	0.0336275	0.229753	-3.71504
LANDIS_ERBB2_BREAST_TUMORS_324_DN	-0.165052	-0.0152762	-2.26396	0.0336972	0.229789	-3.71678
FLORIO_NEOCORTEX_BASAL_RADIAL_GLIA_DN	0.351794	0.0266431	2.26364	0.0337196	0.229789	-3.71734
REACTOME_GOLGI_ASSOCIATED_VESICLE_BIOGENESIS	-0.190547	-0.000335956	-2.2631	0.0337581	0.229789	-3.7183
PID_NFAT_3PATHWAY	0.158256	0.0338329	2.26082	0.0339209	0.230611	-3.72233
CHO_NR4A1_TARGETS	-0.201015	-0.00500716	-2.25943	0.0340199	0.230873	-3.72478
DELASERNA_TARGETS_OF_MYOD_AND_SMARCA4	-0.270192	0.0276215	-2.25869	0.0340725	0.230873	-3.72608
REACTOME_POLO_LIKE_KINASE_MEDIATED_EVENTS	0.388053	0.00396945	2.2582	0.034108	0.230873	-3.72695
HEIDENBLAD_AMPLICON_8Q24_DN	-0.177264	-0.0147608	-2.25775	0.0341401	0.230873	-3.72774
WANG_RESPONSE_TO_ANDROGEN_UP	-0.169961	-0.0141301	-2.25708	0.0341879	0.230873	-3.72892
REACTOME_RNA_POLYMERASE_I_TRANSCRIPTION	0.22205	-0.00208256	2.2565	0.0342297	0.230873	-3.72994
STEIN_ESRRA_TARGETS	0.129319	0.00144643	2.2551	0.0343308	0.230873	-3.73242
DANG_MYC_TARGETS_DN	-0.133214	-0.0011485	-2.25502	0.0343368	0.230873	-3.73256
REACTOME_ACTIVATION_OF_THE_PRE_REPLICATIVE_COMPLEX	0.41478	0.0114662	2.25501	0.0343371	0.230873	-3.73257
PAPASPYRIDONOS_UNSTABLE_ATEROSCLEROTIC_PLAQUE_UP	-0.207519	0.028148	-2.25322	0.0344666	0.231321	-3.73573
REACTOME_MET_ACTIVATES_PI3K_AKT_SIGNALING	-0.28191	0.00767665	-2.25286	0.0344928	0.231321	-3.73637
BIOCARTA_HSWI_SNF_PATHWAY	0.310073	0.00617083	2.25167	0.0345789	0.231321	-3.73846
BIOCARTA_RANBP2_PATHWAY	0.234004	-0.0121679	2.25147	0.0345934	0.231321	-3.73881
JOSEPH_RESPONSE_TO_SODIUM_BUTYRATE_UP	-0.220693	-0.0157353	-2.25119	0.034614	0.231321	-3.73931
FAELT_B_CLL_WITH_VH_REARRANGEMENTS_UP	-0.150296	0.00415171	-2.24873	0.0347932	0.231957	-3.74364
PID_WNT_CANONICAL_PATHWAY	0.165637	-0.002378	2.24872	0.0347936	0.231957	-3.74365
WU_CELL_MIGRATION	-0.137839	0.0059695	-2.24576	0.0350107	0.232496	-3.74886
CHEOK_RESPONSE_TO_HD_MTX_DN	-0.171437	0.000179484	-2.24567	0.0350167	0.232496	-3.74901
WINZEN_DEGRADED_VIA_KHSRP	-0.167127	0.0157744	-2.2449	0.0350734	0.232496	-3.75036
LINDGREN_BLADDER_CANCER_CLUSTER_2B	-0.150728	-0.00546779	-2.24457	0.0350982	0.232496	-3.75095
CONCANNON_APOPTOSIS_BY_EPOXOMICIN_UP	-0.144008	0.00473331	-2.2441	0.0351326	0.232496	-3.75178
REACTOME_INTERFERON_SIGNALING	0.160319	-0.00405426	2.24355	0.0351729	0.232496	-3.75274
XU_GH1_AUTOCRINE_TARGETS_DN	-0.147324	-0.00916759	-2.24308	0.0352075	0.232496	-3.75356
REACTOME_MYOCLONIC_EPILEPSY_OF_LAFORA	-0.406773	0.00160026	-2.24298	0.035215	0.232496	-3.75374
RODWELL_AGING_KIDNEY_NO_BLOOD_UP	-0.180133	-0.00961339	-2.24244	0.0352548	0.232496	-3.75469
RUTELLA_RESPONSE_TO_HGF_VS_CSF2RB_AND_IL4_DN	-0.118351	0.0162518	-2.24129	0.0353399	0.232778	-3.75671
WANG_RESPONSE_TO_GSK3_INHIBITOR_SB216763_UP	-0.184558	-0.0168191	-2.23968	0.0354592	0.233284	-3.75953
OZANNE_AP1_TARGETS_UP	0.275567	0.0427528	2.23844	0.0355516	0.233613	-3.76171
GARGALOVIC_RESPONSE_TO_OXIDIZED_PHOSPHOLIPIDS_TURQUOISE_UP	-0.202705	-0.00101459	-2.23572	0.0357543	0.234664	-3.76647
BONOME_OVARIAN_CANCER_SURVIVAL_OPTIMAL_DEBULKING	-0.125791	0.00250187	-2.23413	0.0358738	0.235046	-3.76927
CASTELLANO_HRAS_AND_NRAS_TARGETS_UP	0.330491	0.0303469	2.23381	0.0358979	0.235046	-3.76983
GAUSSMANN_MLL_AF4_FUSION_TARGETS_A_UP	-0.136839	-0.00625338	-2.2317	0.0360566	0.235532	-3.77353
TONKS_TARGETS_OF_RUNX1_RUNX1T1_FUSION_HSC_DN	-0.1588	-0.00406785	-2.23121	0.0360933	0.235532	-3.77438
REACTOME_PLASMA_LIPOPROTEIN_ASSEMBLY_REMODELING_AND_CLEARANCE	-0.183145	-0.0116343	-2.23112	0.0361007	0.235532	-3.77455
FU_INTERACT_WITH_ALKBH8	0.386816	0.0128004	2.23047	0.0361493	0.23557	-3.77568
HADDAD_B_LYMPHOCYTE_PROGENITOR	-0.129265	-0.00350975	-2.22926	0.0362409	0.235888	-3.7778
RODRIGUES_NTN1_TARGETS_DN	-0.132191	-0.00850192	-2.22673	0.0364334	0.236468	-3.78223
XU_AKT1_TARGETS_48HR	0.328041	-0.0155906	2.22651	0.03645	0.236468	-3.78261
REACTOME_SIGNALING_BY_MST1	-0.341524	-0.0326385	-2.22639	0.036459	0.236468	-3.78282
SPIELMAN_LYMPHOBLAST_EUROPEAN_VS_ASIAN_DN	-0.135947	-0.003821	-2.22528	0.036544	0.236598	-3.78477
ROETH_TERT_TARGETS_UP	0.20999	0.00998936	2.22448	0.0366051	0.236598	-3.78616
KIM_ALL_DISORDERS_DURATION_CORR_DN	0.165252	0.0060436	2.22444	0.0366081	0.236598	-3.78623
KORKOLA_YOLK_SAC_TUMOR_UP	-0.305266	-0.0114585	-2.22347	0.0366821	0.236731	-3.78792
REACTOME_DISPLACEMENT_OF_DNA_GLYCOSYLASE_BY_APEX1	0.281701	-0.00959873	2.22251	0.036756	0.236731	-3.78961
REACTOME_SYNTHESIS_OF_LIPOXINS_LX	-0.389881	0.0100876	-2.22248	0.0367579	0.236731	-3.78965
REACTOME_ACTIVATION_OF_APC_C_AND_APC_C:CDC20_MEDIATED_DEGRADATION_OF_MITOTIC_PROTEINS	0.296326	0.027497	2.22168	0.0368196	0.236817	-3.79105
REACTOME_SULFIDE_OXIDATION_TO_SULFATE	0.41759	-0.0139511	2.22119	0.0368573	0.236817	-3.79191
BROWNE_HCMV_INFECTION_14HR_UP	-0.153257	-0.00256782	-2.21988	0.0369582	0.237188	-3.7942
MOOTHA_VOXPHOS	0.228646	0.00777462	2.21845	0.0370687	0.237244	-3.79669
PARK_TRETINOIN_RESPONSE_AND_PML_RARA_FUSION	-0.195115	-0.00911386	-2.21806	0.0370985	0.237244	-3.79737
UDAYAKUMAR_MED1_TARGETS_DN	-0.158522	0.000640554	-2.21804	0.0371004	0.237244	-3.79741
XU_GH1_AUTOCRINE_TARGETS_UP	-0.110062	-0.00228694	-2.21684	0.037193	0.237244	-3.79949
NABA_MATRISOME	-0.122321	-0.00352318	-2.21655	0.0372154	0.237244	-3.8
REACTOME_ACTIVATED_NTRK2_SIGNALS_THROUGH_FRS2_AND_FRS3	-0.261388	0.0183671	-2.21642	0.0372257	0.237244	-3.80023
STEARMAN_TUMOR_FIELD_EFFECT_UP	-0.209653	-0.0154314	-2.21561	0.0372889	0.237372	-3.80165
ANDERSEN_LIVER_CANCER_KRT19_DN	-0.169352	-0.00681354	-2.21434	0.0373871	0.237665	-3.80385
LE_NEURONAL_DIFFERENTIATION_DN	0.305277	0.0248568	2.2139	0.0374214	0.237665	-3.80461
DEMAGALHAES_AGING_DN	-0.252075	-0.0144135	-2.2127	0.0375152	0.237986	-3.80671
REACTOME_SUMOYLATION	0.19177	0.00856788	2.21164	0.0375982	0.238238	-3.80855
ISHIDA_E2F_TARGETS	0.435091	0.021375	2.20955	0.0377621	0.238927	-3.81219
MUELLER_COMMON_TARGETS_OF_AML_FUSIONS_UP	0.329685	0.00166827	2.20888	0.0378152	0.238927	-3.81337
MARIADASON_RESPONSE_TO_BUTYRATE_CURCUMIN_SULINDAC_TSA_8	-0.296704	0.0306757	-2.20826	0.0378639	0.238927	-3.81444
REACTOME_DNA_REPAIR	0.222808	0.0073171	2.20805	0.0378808	0.238927	-3.81481
GARGALOVIC_RESPONSE_TO_OXIDIZED_PHOSPHOLIPIDS_BLACK_UP	-0.241091	0.000689159	-2.20663	0.0379927	0.239358	-3.81728
WINNEPENNINCKX_MELANOMA_METASTASIS_UP	0.348802	0.0242633	2.20427	0.0381797	0.240118	-3.82138
MARTENS_TRETINOIN_RESPONSE_DN	0.154559	0.0031687	2.20385	0.0382132	0.240118	-3.82211
PID_UPA_UPAR_PATHWAY	-0.197353	-0.0163398	-2.20346	0.0382442	0.240118	-3.82279
REACTOME_SYNTHESIS_OF_16_20_HYDROXYEICOSATETRAENOIC_ACIDS_HETE	-0.289216	0.00243581	-2.20257	0.0383151	0.240289	-3.82434
DING_LUNG_CANCER_BY_MUTATION_RATE	0.201341	-0.00702677	2.19933	0.0385739	0.2414	-3.82996
REACTOME_CILIUM_ASSEMBLY	0.16701	-0.00382938	2.19925	0.0385801	0.2414	-3.83009
REACTOME_SUMOYLATION_OF_CHROMATIN_ORGANIZATION_PROTEINS	0.211378	0.0030564	2.19868	0.0386259	0.241412	-3.83108
MCDOWELL_ACUTE_LUNG_INJURY_DN	-0.134532	-0.00718689	-2.19665	0.0387899	0.241766	-3.83462
REACTOME_WAX_AND_PLASMALOGEN_BIOSYNTHESIS	-0.283136	0.00823448	-2.19664	0.0387901	0.241766	-3.83463
WIEDERSCHAIN_TARGETS_OF_BMI1_AND_PCGF2	-0.149998	-0.0015609	-2.19634	0.0388144	0.241766	-3.83515
BRUINS_UVC_RESPONSE_EARLY_LATE	0.118873	0.00354984	2.19543	0.0388877	0.241948	-3.83672
REACTOME_TRANSCRIPTIONAL_ACTIVITY_OF_SMAD2_SMAD3:SMAD4_HETEROTRIMER	-0.194517	0.012009	-2.19156	0.0392014	0.243505	-3.84343
REACTOME_SULFUR_AMINO_ACID_METABOLISM	0.225528	0.00281729	2.19126	0.0392264	0.243505	-3.84396
BENPORATH_CYCLING_GENES	0.206875	0.0054107	2.18963	0.0393589	0.244029	-3.84678
REACTOME_INSULIN_RECEPTOR_RECYCLING	-0.316042	-0.0111606	-2.18913	0.0393996	0.244029	-3.84764
CERIBELLI_PROMOTERS_INACTIVE_AND_BOUND_BY_NFY	0.221999	0.0130814	2.18806	0.0394871	0.244296	-3.84949
SHAFFER_IRF4_TARGETS_IN_PLASMA_CELL_VS_MATURE_B_LYMPHOCYTE	-0.167139	-0.00227126	-2.18654	0.0396122	0.244452	-3.85213
CHIANG_LIVER_CANCER_SUBCLASS_CTNNB1_DN	-0.134828	-0.00739781	-2.18646	0.0396185	0.244452	-3.85226
REACTOME_TRANS_GOLGI_NETWORK_VESICLE_BUDDING	-0.169625	0.000641053	-2.18613	0.0396456	0.244452	-3.85283
HOLLEMAN_VINCRISTINE_RESISTANCE_B_ALL_UP	-0.175312	-0.0192037	-2.18483	0.0397526	0.244837	-3.85508
HOWLIN_CITED1_TARGETS_2_UP	0.213041	-0.00324845	2.18372	0.0398439	0.245125	-3.85699
REACTOME_SIGNALING_BY_PDGF	-0.193277	0.00299824	-2.18312	0.039894	0.245159	-3.85804
CAVARD_LIVER_CANCER_MALIGNANT_VS_BENIGN	-0.211212	-0.00417647	-2.18214	0.0399752	0.245383	-3.85973
SHEPARD_BMYB_TARGETS	0.230941	0.00157733	2.18145	0.0400323	0.24546	-3.86092
REACTOME_SIGNALING_BY_EGFR_IN_CANCER	-0.207614	0.00674777	-2.18047	0.0401138	0.245686	-3.86262
FUJII_YBX1_TARGETS_DN	0.285362	0.0099637	2.17843	0.0402837	0.246217	-3.86614
CHEN_LVAD_SUPPORT_OF_FAILING_HEART_DN	-0.199556	-0.0149098	-2.17762	0.0403512	0.246217	-3.86754
BASSO_HAIRY_CELL_LEUKEMIA_UP	-0.194295	-0.00787471	-2.17759	0.040353	0.246217	-3.86758
LEE_INTRATHYMIC_T_PROGENITOR	-0.185876	-0.00642401	-2.17721	0.040385	0.246217	-3.86824
REACTOME_GLUCOSE_METABOLISM	0.224291	0.0122245	2.17674	0.0404244	0.246217	-3.86905
HEIDENBLAD_AMPLIFIED_IN_BONE_CANCER	-0.248239	-0.00218299	-2.17414	0.0406429	0.247274	-3.87354
REACTOME_RUNX2_REGULATES_OSTEOBLAST_DIFFERENTIATION	-0.187264	-0.00759966	-2.17309	0.0407311	0.247298	-3.87535
REACTOME_INTERLEUKIN_2_FAMILY_SIGNALING	-0.18415	-0.00555383	-2.1725	0.0407802	0.247298	-3.87635
SCHLINGEMANN_SKIN_CARCINOGENESIS_TPA_DN	-0.224582	-0.00384679	-2.17236	0.0407924	0.247298	-3.8766
STEIN_ESRRA_TARGETS_UP	0.146414	0.000457503	2.17152	0.0408634	0.247298	-3.87805
LEE_TARGETS_OF_PTCH1_AND_SUFU_DN	-0.138248	-0.0036388	-2.17142	0.0408716	0.247298	-3.87822
AMIT_SERUM_RESPONSE_20_MCF10A	0.211584	-0.0259127	2.16953	0.0410318	0.247995	-3.88148
VARELA_ZMPSTE24_TARGETS_UP	-0.181121	0.0124253	-2.1682	0.0411446	0.248238	-3.88376
OKUMURA_INFLAMMATORY_RESPONSE_LPS	-0.111597	-0.00670446	-2.16796	0.0411652	0.248238	-3.88418
REACTOME_THE_ROLE_OF_GTSE1_IN_G2_M_PROGRESSION_AFTER_G2_CHECKPOINT	0.288878	0.022978	2.16739	0.0412139	0.248238	-3.88516
REACTOME_SYNTHESIS_OF_LEUKOTRIENES_LT_AND_EOXINS_EX	-0.26635	-0.0195595	-2.16685	0.0412594	0.248238	-3.88608
REACTOME_NEGATIVE_REGULATORS_OF_DDX58_IFIH1_SIGNALING	0.209087	-0.00373145	2.1664	0.0412977	0.248238	-3.88685
REACTOME_INTERFERON_ALPHA_BETA_SIGNALING	0.193675	-0.00791715	2.16498	0.041419	0.248695	-3.8893
CHAUHAN_RESPONSE_TO_METHOXYESTRADIOL_DN	-0.134024	-0.001916	-2.16367	0.0415318	0.2491	-3.89156
IGLESIAS_E2F_TARGETS_UP	-0.140618	-0.0109864	-2.16057	0.0417983	0.249984	-3.89688
REACTOME_SYNTHESIS_OF_GDP_MANNOSE	0.341408	0.0436501	2.16051	0.0418027	0.249984	-3.89697
ADDYA_ERYTHROID_DIFFERENTIATION_BY_HEMIN	-0.135908	0.000654312	-2.16037	0.0418154	0.249984	-3.89722
REACTOME_CONDENSATION_OF_PROMETAPHASE_CHROMOSOMES	0.364018	0.0164908	2.15978	0.0418661	0.250002	-3.89823
NIKOLSKY_BREAST_CANCER_7P22_AMPLICON	0.16542	0.00456186	2.15883	0.041948	0.250002	-3.89986
BACOLOD_RESISTANCE_TO_ALKYLATING_AGENTS_UP	-0.187977	-0.00976606	-2.15875	0.0419548	0.250002	-3.89999
REACTOME_FOXO_MEDIATED_TRANSCRIPTION_OF_CELL_CYCLE_GENES	-0.26077	0.0149018	-2.158	0.0420203	0.250004	-3.90129
BURTON_ADIPOGENESIS_PEAK_AT_16HR	0.343598	0.00284605	2.15635	0.0421637	0.250004	-3.90413
REACTOME_BETA_OXIDATION_OF_OCTANOYL_COA_TO_HEXANOYL_COA	0.382867	0.0480523	2.15616	0.0421796	0.250004	-3.90444
BIOCARTA_RAB_PATHWAY	-0.26112	0.0121327	-2.15593	0.0422	0.250004	-3.90484
REACTOME_NEGATIVE_REGULATION_OF_MET_ACTIVITY	-0.177364	-0.00531525	-2.15572	0.0422178	0.250004	-3.90519
GOZGIT_ESR1_TARGETS_DN	-0.12652	0.00134549	-2.1556	0.0422287	0.250004	-3.90541
BIOCARTA_G1_PATHWAY	-0.202937	0.0053064	-2.15406	0.0423627	0.250004	-3.90804
PID_RHOA_PATHWAY	0.157729	-0.00534768	2.15386	0.0423802	0.250004	-3.90839
REACTOME_SYNTHESIS_OF_PIPS_AT_THE_LATE_ENDOSOME_MEMBRANE	-0.216097	-0.00562423	-2.15352	0.0424098	0.250004	-3.90897
REACTOME_G2_PHASE	0.386186	-0.0184886	2.15287	0.0424664	0.250004	-3.91007
HOELZEL_NF1_TARGETS_UP	-0.159087	0.000378332	-2.15286	0.0424675	0.250004	-3.9101
SARRIO_EPITHELIAL_MESENCHYMAL_TRANSITION_UP	0.330872	0.0105109	2.15248	0.0425007	0.250004	-3.91075
ODONNELL_TFRC_TARGETS_DN	0.286863	0.00743457	2.15191	0.0425505	0.25003	-3.91172
SENESE_HDAC1_AND_HDAC2_TARGETS_DN	-0.181498	-0.00706313	-2.14981	0.0427352	0.250604	-3.91532
NAKAMURA_METASTASIS_MODEL_DN	0.140095	0.00408527	2.14912	0.0427961	0.250604	-3.9165
LIANG_SILENCED_BY_METHYLATION_UP	-0.226519	-0.0130931	-2.14874	0.0428296	0.250604	-3.91716
REACTOME_CHROMOSOME_MAINTENANCE	0.355003	-0.000804901	2.14873	0.0428305	0.250604	-3.91717
KOBAYASHI_EGFR_SIGNALING_24HR_DN	0.365328	0.0145464	2.14796	0.0428981	0.250682	-3.91848
REACTOME_BUDDING_AND_MATURATION_OF_HIV_VIRION	-0.225476	-0.0185962	-2.14754	0.0429351	0.250682	-3.9192
REACTOME_SURFACTANT_METABOLISM	-0.217244	-0.00544419	-2.14546	0.043119	0.251107	-3.92275
REACTOME_VIRAL_MESSENGER_RNA_SYNTHESIS	0.272194	0.00762915	2.14509	0.0431522	0.251107	-3.92339
KESHELAVA_MULTIPLE_DRUG_RESISTANCE	-0.196136	0.00825511	-2.14485	0.0431735	0.251107	-3.9238
FISCHER_DREAM_TARGETS	0.300584	0.00792736	2.14466	0.0431904	0.251107	-3.92413
VALK_AML_CLUSTER_10	-0.163784	-0.00892975	-2.14304	0.0433342	0.251677	-3.92689
REACTOME_SUMOYLATION_OF_RNA_BINDING_PROTEINS	0.254469	0.00965751	2.14047	0.043564	0.252745	-3.93128
HORIUCHI_WTAP_TARGETS_DN	0.252989	0.00714962	2.13823	0.0437647	0.253641	-3.9351
HAHTOLA_MYCOSIS_FUNGOIDES_CD4_UP	-0.153784	0.02007	-2.13746	0.0438344	0.253778	-3.93642
DELYS_THYROID_CANCER_UP	-0.135468	0.00120607	-2.13658	0.043913	0.253966	-3.93791
KAUFFMANN_DNA_REPAIR_GENES	0.2382	0.00311217	2.1357	0.0439924	0.254158	-3.93941
BROWNE_HCMV_INFECTION_2HR_DN	0.210844	0.00355975	2.13335	0.0442053	0.254983	-3.94342
REACTOME_ASSEMBLY_OF_THE_ORC_COMPLEX_AT_THE_ORIGIN_OF_REPLICATION	0.370322	0.0201527	2.1331	0.0442279	0.254983	-3.94384
TONKS_TARGETS_OF_RUNX1_RUNX1T1_FUSION_GRANULOCYTE_DN	-0.267925	-0.0110088	-2.132	0.0443284	0.255295	-3.94573
ONDER_CDH1_TARGETS_2_UP	-0.151516	-0.00531236	-2.13146	0.0443773	0.255309	-3.94664
MARKEY_RB1_ACUTE_LOF_UP	0.26676	0.01458	2.12627	0.0448519	0.25777	-3.95547
SCHRAETS_MLL_TARGETS_DN	-0.203884	0.00751431	-2.12285	0.0451676	0.25924	-3.96129
GREGORY_SYNTHETIC_LETHAL_WITH_IMATINIB	-0.122047	-0.00396663	-2.12246	0.0452035	0.25924	-3.96194
PID_HEDGEHOG_2PATHWAY	-0.209095	-0.000525599	-2.12172	0.0452718	0.25924	-3.9632
DIRMEIER_LMP1_RESPONSE_EARLY	-0.160633	0.0145279	-2.12146	0.0452962	0.25924	-3.96364
RUIZ_TNC_TARGETS_UP	-0.229842	-0.0257647	-2.1205	0.0453851	0.259478	-3.96527
KEGG_PYRIMIDINE_METABOLISM	0.207955	0.00613028	2.11896	0.0455287	0.260029	-3.96789
PHONG_TNF_TARGETS_UP	-0.219356	0.0174479	-2.11829	0.0455911	0.260038	-3.96902
ZHANG_RESPONSE_TO_CANTHARIDIN_DN	0.253581	0.0114073	2.11759	0.0456558	0.260038	-3.9702
REN_BOUND_BY_E2F	0.388538	0.00891701	2.11742	0.0456722	0.260038	-3.9705
SCHAEFFER_PROSTATE_DEVELOPMENT_AND_CANCER_BOX1_UP	0.232106	-0.0184592	2.11673	0.0457367	0.260136	-3.97167
STEARMAN_LUNG_CANCER_EARLY_VS_LATE_DN	-0.161069	-0.0198156	-2.11607	0.0457986	0.260194	-3.97279
KYNG_DNA_DAMAGE_BY_4NQO_OR_GAMMA_RADIATION	0.215846	0.00446622	2.11561	0.0458414	0.260194	-3.97356
REACTOME_DISEASES_OF_CARBOHYDRATE_METABOLISM	-0.239889	0.0158054	-2.11469	0.0459273	0.260413	-3.97511
REACTOME_DNA_REPLICATION_PRE_INITIATION	0.301813	0.0276572	2.11356	0.0460337	0.260495	-3.97703
DARWICHE_SKIN_TUMOR_PROMOTER_UP	0.109413	-0.0137817	2.11353	0.0460365	0.260495	-3.97708
BIOCARTA_PARKIN_PATHWAY	0.183199	0.00991679	2.11259	0.046125	0.260555	-3.97867
PID_AURORA_A_PATHWAY	0.240956	-0.0157579	2.11197	0.0461833	0.260555	-3.97972
VALK_AML_WITH_FLT3_ITD	-0.176488	-0.00220026	-2.11191	0.0461892	0.260555	-3.97982
WANG_BARRETTS_ESOPHAGUS_AND_ESOPHAGUS_CANCER_UP	-0.182908	-0.00830791	-2.10963	0.046405	0.261399	-3.98368
BIOCARTA_MALATEX_PATHWAY	0.396054	0.011984	2.10881	0.0464826	0.261399	-3.98507
YANAGIHARA_ESX1_TARGETS	-0.216888	-0.00440808	-2.10854	0.0465085	0.261399	-3.98553
CHIBA_RESPONSE_TO_TSA_DN	-0.188912	0.0145879	-2.10827	0.0465337	0.261399	-3.98598
BASSO_CD40_SIGNALING_DN	-0.133241	-0.00749294	-2.10782	0.0465765	0.261399	-3.98674
PID_LYMPH_ANGIOGENESIS_PATHWAY	-0.1888	0.00467977	-2.1066	0.046693	0.261785	-3.98881
REACTOME_DOWNREGULATION_OF_TGF_BETA_RECEPTOR_SIGNALING	-0.181087	0.00511046	-2.10392	0.0469491	0.262842	-3.99334
REACTOME_RRNA_MODIFICATION_IN_THE_NUCLEUS_AND_CYTOSOL	0.313458	0.0141638	2.10306	0.0470312	0.262842	-3.99478
SASSON_FSH_RESPONSE	-0.186339	-0.00452353	-2.10292	0.0470444	0.262842	-3.99501
KANG_FLUOROURACIL_RESISTANCE_DN	0.25035	-0.0102246	2.10263	0.0470726	0.262842	-3.99551
BIOCARTA_ERBB3_PATHWAY	0.349701	0.0142287	2.0999	0.0473354	0.26387	-4.00012
REACTOME_PROCESSIVE_SYNTHESIS_ON_THE_LAGGING_STRAND	0.46564	-0.0048713	2.09972	0.0473527	0.26387	-4.00042
REACTOME_ER_TO_GOLGI_ANTEROGRADE_TRANSPORT	-0.209066	0.0252152	-2.09749	0.0475678	0.264699	-4.00417
REACTOME_S_PHASE	0.260322	0.0177157	2.09673	0.0476413	0.264699	-4.00545
REACTOME_KERATAN_SULFATE_KERATIN_METABOLISM	-0.208288	-0.0015775	-2.09626	0.0476876	0.264699	-4.00625
MONTERO_THYROID_CANCER_POOR_SURVIVAL_UP	0.421131	0.0628622	2.09438	0.0478705	0.264699	-4.00941
BERENJENO_TRANSFORMED_BY_RHOA_REVERSIBLY_DN	-0.210853	0.00782272	-2.09399	0.0479078	0.264699	-4.01006
CLAUS_PGR_POSITIVE_MENINGIOMA_UP	0.262066	0.00965322	2.09387	0.0479194	0.264699	-4.01026
REACTOME_ELASTIC_FIBRE_FORMATION	-0.220597	-0.021023	-2.09205	0.0480978	0.264699	-4.01333
BIOCARTA_CTBP1_PATHWAY	0.267477	0.0234396	2.09202	0.0481008	0.264699	-4.01338
REACTOME_BETA_OXIDATION_OF_DECANOYL_COA_TO_OCTANOYL_COA_COA	0.350964	0.0306536	2.0918	0.0481217	0.264699	-4.01374
ZHAN_MULTIPLE_MYELOMA_PR_UP	0.41511	0.0407318	2.09164	0.0481379	0.264699	-4.01402
VILLANUEVA_LIVER_CANCER_KRT19_UP	0.255529	0.00338154	2.09123	0.0481778	0.264699	-4.0147
DASU_IL6_SIGNALING_UP	0.20216	-0.00282282	2.09123	0.0481784	0.264699	-4.01472
REACTOME_REGULATION_OF_MITOTIC_CELL_CYCLE	0.268197	0.0173942	2.09106	0.0481947	0.264699	-4.015
KAMMINGA_EZH2_TARGETS	0.392185	0.0280571	2.09095	0.0482055	0.264699	-4.01518
REACTOME_RUNX1_AND_FOXP3_CONTROL_THE_DEVELOPMENT_OF_REGULATORY_T_LYMPHOCYTES_TREGS	-0.27985	0.0242276	-2.09077	0.0482234	0.264699	-4.01549
MEISSNER_BRAIN_HCP_WITH_H3K4ME2	-0.22191	-0.00598082	-2.08938	0.0483593	0.265181	-4.01781
REACTOME_CYTOSOLIC_TRNA_AMINOACYLATION	0.399482	0.0214547	2.08879	0.0484179	0.265237	-4.01881
BIOCARTA_VOBESITY_PATHWAY	0.320766	-0.0210908	2.08742	0.0485523	0.265463	-4.02111
KEGG_BETA_ALANINE_METABOLISM	0.214735	-0.0194046	2.08702	0.0485918	0.265463	-4.02178
GUTIERREZ_WALDENSTROEMS_MACROGLOBULINEMIA_2	-0.286086	-0.0150624	-2.0869	0.0486038	0.265463	-4.02198
FEVR_CTNNB1_TARGETS_DN	0.228938	0.0101294	2.08565	0.0487277	0.265696	-4.02409
REACTOME_RNA_POLYMERASE_I_TRANSCRIPTION_INITIATION	0.216315	-0.00133308	2.08549	0.0487432	0.265696	-4.02435
FONTAINE_PAPILLARY_THYROID_CARCINOMA_UP	0.165063	0.00429014	2.08347	0.0489439	0.266526	-4.02774
MCMURRAY_TP53_HRAS_COOPERATION_RESPONSE_DN	-0.158332	0.000669839	-2.08146	0.0491441	0.267352	-4.03112
MONTERO_THYROID_CANCER_POOR_SURVIVAL_DN	-0.318093	0.00720642	-2.08024	0.049266	0.26775	-4.03316
REACTOME_O2_CO2_EXCHANGE_IN_ERYTHROCYTES	0.240872	0.0178604	2.07905	0.0493853	0.268021	-4.03516
PID_ARF6_PATHWAY	-0.167463	0.0202584	-2.07877	0.0494133	0.268021	-4.03563
BENPORATH_PROLIFERATION	0.305049	0.010534	2.07683	0.049608	0.268199	-4.03887
SHIN_B_CELL_LYMPHOMA_CLUSTER_8	-0.158043	-0.00911206	-2.07657	0.0496343	0.268199	-4.03931
HOEGERKORP_CD44_TARGETS_DIRECT_DN	-0.23529	-0.00588513	-2.07655	0.0496365	0.268199	-4.03935
REACTOME_DOWNREGULATION_OF_SMAD2_3:SMAD4_TRANSCRIPTIONAL_ACTIVITY	-0.229562	0.00255876	-2.0765	0.0496412	0.268199	-4.03943
SANSOM_APC_TARGETS_REQUIRE_MYC	0.175935	-0.00638195	2.07464	0.0498291	0.268945	-4.04254
BILBAN_B_CLL_LPL_UP	-0.153786	-0.00135157	-2.07416	0.049877	0.268945	-4.04334
PUJANA_BRCA2_PCC_NETWORK	0.260508	0.00789657	2.07361	0.0499326	0.268981	-4.04426
KYNG_ENVIRONMENTAL_STRESS_RESPONSE_NOT_BY_UV_IN_OLD	-0.190628	0.0234894	-2.07067	0.0502309	0.270323	-4.04917
REACTOME_HOST_INTERACTIONS_OF_HIV_FACTORS	0.217831	0.0170724	2.0674	0.0505652	0.271856	-4.05464
GUILLAUMOND_KLF10_TARGETS_UP	0.144806	-0.0184795	2.06666	0.0506406	0.27194	-4.05587
BILBAN_B_CLL_LPL_DN	-0.175182	-0.00498468	-2.06572	0.0507367	0.27194	-4.05743
REACTOME_EPH_EPHRIN_MEDIATED_REPULSION_OF_CELLS	-0.12635	0.00493893	-2.06496	0.0508146	0.27194	-4.0587
KEGG_SPLICEOSOME	0.261858	0.00582527	2.06454	0.0508584	0.27194	-4.05941
GRAHAM_CML_DIVIDING_VS_NORMAL_QUIESCENT_UP	0.309839	0.00895336	2.06444	0.0508683	0.27194	-4.05957
HUANG_FOXA2_TARGETS_DN	-0.165005	-0.0142725	-2.06435	0.0508775	0.27194	-4.05972
COLLER_MYC_TARGETS_UP	0.309524	0.0134226	2.06353	0.0509626	0.27213	-4.0611
REACTOME_DNA_METHYLATION	0.387048	-0.0277311	2.06284	0.0510337	0.272142	-4.06225
REACTOME_REGULATION_OF_TP53_ACTIVITY_THROUGH_ACETYLATION	0.20883	0.00783557	2.06255	0.0510637	0.272142	-4.06273
SCHAEFFER_PROSTATE_DEVELOPMENT_6HR_UP	-0.113264	-0.00120798	-2.06073	0.0512512	0.272675	-4.06575
GARGALOVIC_RESPONSE_TO_OXIDIZED_PHOSPHOLIPIDS_GREY_UP	-0.250511	0.00464212	-2.06058	0.0512674	0.272675	-4.06601
PID_PDGFRA_PATHWAY	-0.210744	0.0126459	-2.06014	0.0513125	0.272675	-4.06674
HUI_MAPK14_TARGETS_UP	0.222454	0.000978125	2.0556	0.0517855	0.274481	-4.0743
BIOCARTA_SRCRPTP_PATHWAY	0.312555	-0.0217421	2.05545	0.0518011	0.274481	-4.07454
BILANGES_SERUM_SENSITIVE_GENES	0.144279	0.00103677	2.05518	0.0518296	0.274481	-4.075
GOLUB_ALL_VS_AML_UP	0.280891	0.0128351	2.05496	0.051852	0.274481	-4.07535
VALK_AML_CLUSTER_12	-0.231792	-0.000344581	-2.05376	0.0519777	0.274626	-4.07735
BIOCARTA_SPPA_PATHWAY	-0.187974	0.0221939	-2.05366	0.0519881	0.274626	-4.07751
FINETTI_BREAST_CANCER_KINOME_RED	0.42104	0.0291975	2.05272	0.0520867	0.274626	-4.07907
GARGALOVIC_RESPONSE_TO_OXIDIZED_PHOSPHOLIPIDS_RED_UP	-0.318459	-0.00392538	-2.05269	0.05209	0.274626	-4.07912
DEN_INTERACT_WITH_LCA5	0.224978	0.00569918	2.05232	0.0521291	0.274626	-4.07974
YAMAZAKI_TCEB3_TARGETS_DN	0.148842	0.00107019	2.04998	0.0523756	0.275661	-4.08363
BURTON_ADIPOGENESIS_PEAK_AT_2HR	-0.220374	0.0426605	-2.04943	0.0524338	0.275704	-4.08454
WILLIAMS_ESR1_TARGETS_DN	-0.325141	-0.0279015	-2.04607	0.0527898	0.277296	-4.09011
EHLERS_ANEUPLOIDY_UP	-0.132881	0.00238152	-2.04563	0.0528375	0.277296	-4.09085
KEGG_FOCAL_ADHESION	-0.134439	-0.0063599	-2.04378	0.0530341	0.278063	-4.09391
LI_CISPLATIN_RESISTANCE_UP	-0.22657	0.0197345	-2.04284	0.0531352	0.278327	-4.09548
REACTOME_DNA_REPLICATION	0.285378	0.0210013	2.04232	0.053191	0.278355	-4.09634
PARK_HSC_MARKERS	-0.137483	0.00590592	-2.04098	0.0533343	0.278839	-4.09855
REACTOME_TRANSPORT_OF_ORGANIC_ANIONS	-0.224051	0.01145	-2.03874	0.0535746	0.279205	-4.10225
SENESE_HDAC3_TARGETS_UP	-0.136639	0.00664917	-2.03866	0.0535833	0.279205	-4.10238
REACTOME_TRANSFERRIN_ENDOCYTOSIS_AND_RECYCLING	-0.284494	-0.0116834	-2.03854	0.0535963	0.279205	-4.10258
BIOCARTA_CIRCADIAN_PATHWAY	-0.429896	-0.0567249	-2.03844	0.0536074	0.279205	-4.10275
DANG_MYC_TARGETS_UP	0.232247	0.0108692	2.03664	0.053802	0.279815	-4.10573
DAUER_STAT3_TARGETS_UP	-0.162593	0.0211216	-2.03614	0.0538558	0.279815	-4.10655
MILI_PSEUDOPODIA_HAPTOTAXIS_DN	-0.154809	0.000757981	-2.03545	0.0539312	0.279815	-4.1077
AMIT_SERUM_RESPONSE_60_MCF10A	-0.175529	-0.000907742	-2.0351	0.0539688	0.279815	-4.10828
TOMLINS_PROSTATE_CANCER_UP	-0.135252	0.0110552	-2.03501	0.0539788	0.279815	-4.10843
TONKS_TARGETS_OF_RUNX1_RUNX1T1_FUSION_SUSTAINED_IN_GRANULOCYTE_DN	-0.287279	-0.0146998	-2.03342	0.0541509	0.279902	-4.11104
NIKOLSKY_BREAST_CANCER_15Q26_AMPLICON	-0.245285	-0.0430978	-2.03311	0.0541847	0.279902	-4.11156
REACTOME_RUNX1_REGULATES_TRANSCRIPTION_OF_GENES_INVOLVED_IN_DIFFERENTIATION_OF_MYELOID_CELLS	-0.271638	-0.00323019	-2.03304	0.0541924	0.279902	-4.11167
MOTAMED_RESPONSE_TO_ANDROGEN_UP	-0.4102	-0.0165245	-2.03218	0.0542858	0.279902	-4.11309
ROSS_AML_WITH_CBFB_MYH11_FUSION	-0.194443	-0.00243671	-2.03214	0.0542903	0.279902	-4.11316
REACTOME_INITIAL_TRIGGERING_OF_COMPLEMENT	-0.227268	0.000155386	-2.03204	0.054301	0.279902	-4.11332
GARGALOVIC_RESPONSE_TO_OXIDIZED_PHOSPHOLIPIDS_GREEN_DN	0.201123	-0.022302	2.03139	0.054372	0.280005	-4.11439
PID_NFAT_TFPATHWAY	-0.171528	0.0319724	-2.0301	0.0545134	0.280312	-4.11653
REACTOME_PYRIMIDINE_SALVAGE	0.257933	0.0266597	2.02975	0.0545519	0.280312	-4.1171
REACTOME_SWITCHING_OF_ORIGINS_TO_A_POST_REPLICATIVE_STATE	0.263834	0.0227545	2.02945	0.0545845	0.280312	-4.1176
TERAO_AOX4_TARGETS_HG_DN	0.332082	0.0373332	2.02859	0.0546793	0.280332	-4.11902
REACTOME_AURKA_ACTIVATION_BY_TPX2	0.251251	-0.00355789	2.02849	0.0546902	0.280332	-4.11919
REACTOME_CDC6_ASSOCIATION_WITH_THE_ORC:ORIGIN_COMPLEX	0.350124	0.0241309	2.02552	0.0550172	0.281475	-4.12408
BENPORATH_ES_1	0.219944	0.00206135	2.02529	0.0550419	0.281475	-4.12445
DAVICIONI_TARGETS_OF_PAX_FOXO1_FUSIONS_UP	-0.13017	0.0122816	-2.02424	0.0551577	0.281475	-4.12617
REACTOME_NICOTINATE_METABOLISM	0.194975	-0.00665865	2.02382	0.0552045	0.281475	-4.12687
ZHAN_LATE_DIFFERENTIATION_GENES_DN	-0.268462	0.0152305	-2.02372	0.0552158	0.281475	-4.12704
ZHU_CMV_24_HR_DN	-0.215814	-0.0165444	-2.02363	0.055226	0.281475	-4.12719
MUELLER_PLURINET	0.246703	0.0115509	2.02322	0.0552715	0.281475	-4.12787
BIOCARTA_SKP2E2F_PATHWAY	-0.232399	0.0181667	-2.02244	0.0553574	0.281652	-4.12914
REACTOME_COMPLEMENT_CASCADE	-0.210709	-0.0267202	-2.02179	0.0554294	0.281757	-4.13021
VERRECCHIA_EARLY_RESPONSE_TO_TGFB1	-0.182496	-0.00453696	-2.02089	0.0555301	0.281762	-4.1317
WANG_RESPONSE_TO_FORSKOLIN_UP	-0.153495	-0.0193806	-2.02086	0.0555326	0.281762	-4.13174
ELLWOOD_MYC_TARGETS_UP	-0.231707	-0.0080489	-2.01957	0.0556768	0.282233	-4.13386
TSUNODA_CISPLATIN_RESISTANCE_UP	-0.294173	0.0204818	-2.01901	0.0557392	0.282289	-4.13478
SCHAEFFER_SOX9_TARGETS_IN_PROSTATE_DEVELOPMENT_DN	0.186353	-0.0126392	2.01784	0.0558697	0.282549	-4.1367
REACTOME_CELLULAR_RESPONSE_TO_HYPOXIA	0.213447	0.0161275	2.01756	0.055902	0.282549	-4.13717
LY_AGING_MIDDLE_UP	-0.274035	-0.00644351	-2.0165	0.0560203	0.282549	-4.13891
DARWICHE_PAPILLOMA_RISK_LOW_UP	0.106026	0.000281276	2.01556	0.0561252	0.282549	-4.14044
WHITFIELD_CELL_CYCLE_G2_M	0.220006	0.00996366	2.01551	0.0561318	0.282549	-4.14054
REACTOME_DISEASES_ASSOCIATED_WITH_O_GLYCOSYLATION_OF_PROTEINS	-0.171112	-0.00134444	-2.01509	0.0561789	0.282549	-4.14123
REACTOME_CHREBP_ACTIVATES_METABOLIC_GENE_EXPRESSION	0.333324	-0.0024608	2.01503	0.0561852	0.282549	-4.14132
GRAHAM_CML_QUIESCENT_VS_NORMAL_QUIESCENT_DN	-0.1768	-0.00534477	-2.01454	0.0562409	0.282549	-4.14213
IWANAGA_CARCINOGENESIS_BY_KRAS_UP	-0.101279	-0.00339475	-2.01443	0.0562528	0.282549	-4.14231
KEGG_DRUG_METABOLISM_OTHER_ENZYMES	0.196244	0.00457412	2.0131	0.056403	0.282722	-4.14449
HOLLERN_EMT_BREAST_TUMOR_DN	0.112927	0.00315992	2.0129	0.0564256	0.282722	-4.14482
BROWN_MYELOID_CELL_DEVELOPMENT_UP	-0.151746	-0.0048463	-2.01275	0.0564417	0.282722	-4.14505
GAZDA_DIAMOND_BLACKFAN_ANEMIA_PROGENITOR_UP	-0.188774	-0.003699	-2.01222	0.0565016	0.282765	-4.14593
REACTOME_BINDING_AND_UPTAKE_OF_LIGANDS_BY_SCAVENGER_RECEPTORS	-0.236155	-0.01604	-2.01146	0.0565877	0.282891	-4.14717
BOYAULT_LIVER_CANCER_SUBCLASS_G56_DN	-0.195996	0.0128104	-2.01109	0.0566297	0.282891	-4.14778
REACTOME_SIGNALING_BY_NOTCH2	-0.193684	0.0120048	-2.01036	0.0567128	0.28305	-4.14898
HASLINGER_B_CLL_WITH_17P13_DELETION	0.173947	0.0191334	2.00863	0.0569094	0.283773	-4.15182
REACTOME_ASSEMBLY_OF_THE_PRE_REPLICATIVE_COMPLEX	0.288435	0.0298968	2.0076	0.0570263	0.284098	-4.1535
BIOCARTA_MAL_PATHWAY	0.197553	0.0071965	2.00646	0.0571564	0.284398	-4.15537
LEE_NEURAL_CREST_STEM_CELL_UP	-0.144223	-0.00624772	-2.00566	0.0572478	0.284398	-4.15668
LINDSTEDT_DENDRITIC_CELL_MATURATION_C	-0.159266	-0.00935606	-2.00555	0.0572599	0.284398	-4.15685
REACTOME_MOLECULES_ASSOCIATED_WITH_ELASTIC_FIBRES	-0.192647	-0.0180646	-2.00526	0.0572932	0.284398	-4.15733
FERREIRA_EWINGS_SARCOMA_UNSTABLE_VS_STABLE_UP	0.257742	0.00984149	2.00329	0.057519	0.285168	-4.16055
ALTEMEIER_RESPONSE_TO_LPS_WITH_MECHANICAL_VENTILATION	-0.138547	0.0250326	-2.003	0.057552	0.285168	-4.16102
KYNG_ENVIRONMENTAL_STRESS_RESPONSE_NOT_BY_UV_IN_WS	-0.239059	0.0190736	-2.0011	0.0577706	0.285818	-4.16412
PATIL_LIVER_CANCER	0.13655	0.000548163	2.00055	0.0578343	0.285818	-4.16503
NAKAMURA_CANCER_MICROENVIRONMENT_UP	-0.173048	0.0132617	-1.99959	0.0579451	0.285818	-4.16659
RIGGINS_TAMOXIFEN_RESISTANCE_DN	-0.120513	-0.00961238	-1.99908	0.0580048	0.285818	-4.16744
KEGG_OOCYTE_MEIOSIS	0.176656	-0.00227992	1.99804	0.0581245	0.285818	-4.16912
BOHN_PRIMARY_IMMUNODEFICIENCY_SYNDROM_DN	-0.186767	-0.0236571	-1.99799	0.0581303	0.285818	-4.16921
ELVIDGE_HYPOXIA_BY_DMOG_DN	0.188708	-0.0170734	1.99779	0.0581538	0.285818	-4.16954
MANN_RESPONSE_TO_AMIFOSTINE_UP	0.23534	0.00926634	1.99767	0.0581675	0.285818	-4.16973
REACTOME_LOSS_OF_FUNCTION_OF_TGFBR1_IN_CANCER	-0.25345	0.00845952	-1.99766	0.0581681	0.285818	-4.16974
MARCHINI_TRABECTEDIN_RESISTANCE_DN	-0.218016	-0.00542926	-1.99736	0.0582029	0.285818	-4.17023
GUTIERREZ_WALDENSTROEMS_MACROGLOBULINEMIA_1_UP	-0.310706	-0.0119392	-1.9951	0.0584657	0.286365	-4.17392
REACTOME_INTEGRIN_SIGNALING	-0.165236	-0.00507601	-1.99479	0.0585027	0.286365	-4.17443
REACTOME_TRANSCRIPTIONAL_REGULATION_BY_SMALL_RNAS	0.247962	0.0101613	1.99452	0.0585335	0.286365	-4.17486
HANN_RESISTANCE_TO_BCL2_INHIBITOR_UP	0.155032	-0.00663181	1.99449	0.0585377	0.286365	-4.17492
REACTOME_SYNTHESIS_OF_WYBUTOSINE_AT_G37_OF_TRNA_PHE	0.299913	0.000422276	1.99417	0.0585746	0.286365	-4.17544
AZARE_NEOPLASTIC_TRANSFORMATION_BY_STAT3_UP	-0.116195	0.0189359	-1.99365	0.0586351	0.286406	-4.17628
DAZARD_UV_RESPONSE_CLUSTER_G5	0.253562	-0.00879714	1.993	0.0587118	0.286526	-4.17735
MCCLUNG_DELTA_FOSB_TARGETS_2WK	-0.174751	0.00723652	-1.99168	0.0588662	0.286942	-4.1795
REACTOME_CS_DS_DEGRADATION	-0.267597	-0.0188917	-1.99138	0.0589013	0.286942	-4.17999
CROONQUIST_STROMAL_STIMULATION_DN	0.261611	0.000995389	1.99067	0.0589847	0.287073	-4.18115
THILLAINADESAN_ZNF217_TARGETS_UP	0.238531	-0.00288686	1.99014	0.0590465	0.287073	-4.182
COLDREN_GEFITINIB_RESISTANCE_DN	-0.114161	0.00313421	-1.98968	0.0591009	0.287073	-4.18276
CASORELLI_ACUTE_PROMYELOCYTIC_LEUKEMIA_DN	0.185329	0.0056705	1.98923	0.0591535	0.287073	-4.18348
REACTOME_FORMATION_OF_XYLULOSE_5_PHOSPHATE	0.26871	0.00277169	1.98893	0.0591893	0.287073	-4.18398
MYLLYKANGAS_AMPLIFICATION_HOT_SPOT_24	0.199182	-0.00819833	1.98706	0.0594088	0.287663	-4.187
TURJANSKI_MAPK7_TARGETS	-0.271589	0.0391002	-1.98676	0.0594443	0.287663	-4.18749
REACTOME_MITOTIC_G2_G2_M_PHASES	0.218119	0.0141049	1.98657	0.0594677	0.287663	-4.18781
BIOCARTA_CHEMICAL_PATHWAY	0.218653	-0.00256608	1.98552	0.059591	0.288006	-4.18951
IWANAGA_CARCINOGENESIS_BY_KRAS_PTEN_UP	-0.11118	0.00186458	-1.98485	0.0596706	0.288137	-4.1906
VALK_AML_WITH_EVI1	-0.191121	-0.0229276	-1.98431	0.0597354	0.288197	-4.19149
REACTOME_TRANSPORT_OF_INORGANIC_CATIONS_ANIONS_AND_AMINO_ACIDS_OLIGOPEPTIDES	-0.137562	-0.00135648	-1.98364	0.0598151	0.288328	-4.19258
REACTOME_NEGATIVE_EPIGENETIC_REGULATION_OF_RRNA_EXPRESSION	0.197085	-0.00170771	1.98279	0.059916	0.288562	-4.19395
CAIRO_HEPATOBLASTOMA_CLASSES_UP	0.257285	0.0170237	1.98037	0.0602048	0.289699	-4.19788
DUTERTRE_ESTRADIOL_RESPONSE_6HR_DN	-0.127892	-0.00619857	-1.97852	0.0604261	0.29003	-4.20088
HERNANDEZ_ABERRANT_MITOSIS_BY_DOCETACEL_2NM_DN	-0.246328	-0.00656031	-1.97837	0.0604443	0.29003	-4.20112
HADDAD_T_LYMPHOCYTE_AND_NK_PROGENITOR_DN	-0.191616	-0.00767636	-1.9777	0.0605248	0.29003	-4.20221
REACTOME_DISEASES_ASSOCIATED_WITH_N_GLYCOSYLATION_OF_PROTEINS	-0.265853	-0.018747	-1.97764	0.0605316	0.29003	-4.2023
ROZANOV_MMP14_TARGETS_SUBSET	-0.281848	-0.0494945	-1.97759	0.0605372	0.29003	-4.20238
SONG_TARGETS_OF_IE86_CMV_PROTEIN	0.359984	-0.00648157	1.97549	0.0607902	0.29052	-4.20578
SHEDDEN_LUNG_CANCER_POOR_SURVIVAL_A6	0.270062	0.010047	1.97544	0.0607959	0.29052	-4.20586
MILI_PSEUDOPODIA_CHEMOTAXIS_DN	-0.156304	-0.00625158	-1.97487	0.0608655	0.29052	-4.2068
WANG_LSD1_TARGETS_UP	-0.203918	-0.00919366	-1.97346	0.0610356	0.29052	-4.20907
REACTOME_TELOMERE_MAINTENANCE	0.326352	0.00350735	1.97343	0.0610393	0.29052	-4.20912
ENK_UV_RESPONSE_EPIDERMIS_DN	-0.122783	0.000399207	-1.9728	0.0611149	0.29052	-4.21013
LEE_NEURAL_CREST_STEM_CELL_DN	-0.131511	-0.00016579	-1.97253	0.0611478	0.29052	-4.21057
LU_TUMOR_ENDOTHELIAL_MARKERS_UP	-0.203161	-0.00388261	-1.97253	0.061148	0.29052	-4.21058
REACTOME_DEPOLYMERISATION_OF_THE_NUCLEAR_LAMINA	0.211021	-0.0134015	1.9723	0.0611757	0.29052	-4.21095
REACTOME_MITOCHONDRIAL_BIOGENESIS	0.149907	-0.00774933	1.9721	0.0612005	0.29052	-4.21128
REACTOME_FORMYL_PEPTIDE_RECEPTORS_BIND_FORMYL_PEPTIDES_AND_MANY_OTHER_LIGANDS	-0.326606	0.00550065	-1.97193	0.0612206	0.29052	-4.21154
LINDGREN_BLADDER_CANCER_HIGH_RECURRENCE	-0.189535	-0.00369276	-1.96934	0.0615361	0.291621	-4.21574
REACTOME_CREB3_FACTORS_ACTIVATE_GENES	-0.313988	-0.000444268	-1.96848	0.0616407	0.291621	-4.21713
LEE_LIVER_CANCER_CIPROFIBRATE_UP	-0.12638	-0.00962741	-1.96815	0.0616807	0.291621	-4.21765
GRAHAM_CML_DIVIDING_VS_NORMAL_QUIESCENT_DN	-0.129026	-0.00905969	-1.96811	0.0616861	0.291621	-4.21773
REACTOME_PRE_NOTCH_PROCESSING_IN_THE_ENDOPLASMIC_RETICULUM	-0.284535	-0.0141295	-1.96785	0.0617176	0.291621	-4.21814
MOOTHA_HUMAN_MITODB_6_2002	0.169199	0.0125449	1.96696	0.0618269	0.291887	-4.21959
FRASOR_RESPONSE_TO_ESTRADIOL_DN	-0.131162	0.0161039	-1.96628	0.0619101	0.29199	-4.22068
WILSON_PROTEASES_AT_TUMOR_BONE_INTERFACE_DN	-0.379874	0.00173819	-1.96591	0.061955	0.29199	-4.22127
SILIGAN_TARGETS_OF_EWS_FLI1_FUSION_DN	-0.190707	0.0207498	-1.96504	0.0620624	0.292142	-4.22269
KONDO_EZH2_TARGETS	-0.137806	0.00197689	-1.96457	0.0621198	0.292142	-4.22344
REACTOME_RHO_GTPASES_ACTIVATE_WASPS_AND_WAVES	-0.191951	0.0223875	-1.96435	0.0621465	0.292142	-4.22379
KEGG_CYTOKINE_CYTOKINE_RECEPTOR_INTERACTION	-0.115373	-0.0118741	-1.96372	0.0622242	0.292257	-4.22481
KRIGE_RESPONSE_TO_TOSEDOSTAT_24HR_DN	0.185815	0.0103354	1.96166	0.0624781	0.293199	-4.22813
REACTOME_G2_M_CHECKPOINTS	0.269071	0.0222064	1.96064	0.0626044	0.293481	-4.22978
REACTOME_E3_UBIQUITIN_LIGASES_UBIQUITINATE_TARGET_PROTEINS	0.127408	0.00269727	1.96031	0.0626449	0.293481	-4.2303
KEGG_O_GLYCAN_BIOSYNTHESIS	-0.195462	-0.000250477	-1.95944	0.062753	0.293508	-4.23171
GROSS_ELK3_TARGETS_DN	0.177311	0.0254166	1.95919	0.0627844	0.293508	-4.23212
REACTOME_KINESINS	0.210657	0.00120893	1.9588	0.0628324	0.293508	-4.23274
SHEDDEN_LUNG_CANCER_GOOD_SURVIVAL_A12	-0.117654	0.00109839	-1.95855	0.062864	0.293508	-4.23315
BIOCARTA_TID_PATHWAY	-0.225188	0.0245702	-1.9578	0.0629562	0.293689	-4.23434
KONDO_HYPOXIA	0.284513	-0.000100517	1.95602	0.0631785	0.294476	-4.23721
REACTOME_TYROSINE_CATABOLISM	0.287752	0.0511387	1.95484	0.0633259	0.294913	-4.23911
LANDIS_BREAST_CANCER_PROGRESSION_DN	-0.168319	-0.0170682	-1.95386	0.0634483	0.295233	-4.24069
YAO_TEMPORAL_RESPONSE_TO_PROGESTERONE_CLUSTER_0	-0.190295	-0.0132164	-1.95317	0.0635346	0.295385	-4.24179
NIKOLSKY_BREAST_CANCER_17P11_AMPLICON	-0.291073	-0.00377858	-1.95168	0.0637212	0.295557	-4.24418
YAO_TEMPORAL_RESPONSE_TO_PROGESTERONE_CLUSTER_1	-0.182348	-0.00966062	-1.95155	0.0637376	0.295557	-4.24439
WESTON_VEGFA_TARGETS	-0.139939	-0.0175995	-1.95117	0.0637858	0.295557	-4.24501
REACTOME_PROTEIN_FOLDING	0.15037	-0.00264474	1.95116	0.0637866	0.295557	-4.24502
MIYAGAWA_TARGETS_OF_EWSR1_ETS_FUSIONS_DN	-0.139583	0.00170143	-1.95057	0.0638616	0.295656	-4.24597
ZERBINI_RESPONSE_TO_SULINDAC_UP	-0.302275	0.00144629	-1.94868	0.0641001	0.296109	-4.24901
REACTOME_GLYCOLYSIS	0.200041	0.0058743	1.94858	0.0641122	0.296109	-4.24916
NUYTTEN_NIPP1_TARGETS_UP	-0.0986346	-0.000535737	-1.9484	0.0641347	0.296109	-4.24945
NAGASHIMA_NRG1_SIGNALING_UP	-0.154674	0.00234474	-1.94809	0.0641748	0.296109	-4.24996
DAIRKEE_CANCER_PRONE_RESPONSE_E2	0.172177	-0.0153205	1.94617	0.0644176	0.29698	-4.25303
REACTOME_DOPAMINE_NEUROTRANSMITTER_RELEASE_CYCLE	-0.200423	0.00225019	-1.94555	0.0644962	0.29709	-4.25402
NUYTTEN_EZH2_TARGETS_UP	-0.124716	0.00136888	-1.94513	0.0645496	0.29709	-4.25469
SWEET_LUNG_CANCER_KRAS_UP	-0.101956	0.00163844	-1.94268	0.0648624	0.298124	-4.25863
PID_CMYB_PATHWAY	-0.131301	0.00407598	-1.94175	0.0649804	0.298124	-4.2601
IVANOVSKA_MIR106B_TARGETS	-0.175186	0.0023176	-1.9415	0.0650133	0.298124	-4.26052
REACTOME_SIGNALING_BY_FGFR1_IN_DISEASE	-0.16683	-0.00200547	-1.94136	0.0650313	0.298124	-4.26074
GOUYER_TATI_TARGETS_UP	0.243541	0.0103302	1.94125	0.0650452	0.298124	-4.26092
REACTOME_CHROMATIN_ORGANIZATION	0.14917	0.00105713	1.94048	0.0651436	0.298311	-4.26214
REACTOME_MITOCHONDRIAL_PROTEIN_IMPORT	0.21578	0.0309176	1.94008	0.0651946	0.298311	-4.26278
BAFNA_MUC4_TARGETS_DN	-0.2516	0.0137377	-1.939	0.0653333	0.298698	-4.26451
REACTOME_APOBEC3G_MEDIATED_RESISTANCE_TO_HIV_1_INFECTION	0.265031	-0.0159386	1.93685	0.0656096	0.299711	-4.26794
REACTOME_CYP2E1_REACTIONS	0.235784	-0.00919431	1.9351	0.0658356	0.300284	-4.27073
KIM_GERMINAL_CENTER_T_HELPER_UP	-0.131845	-0.000656271	-1.93454	0.0659086	0.300284	-4.27163
KAUFFMANN_DNA_REPLICATION_GENES	0.233992	-0.00111768	1.93424	0.0659477	0.300284	-4.27212
VALK_AML_CLUSTER_7	-0.181434	0.00778088	-1.93413	0.0659614	0.300284	-4.27229
GOTZMANN_EPITHELIAL_TO_MESENCHYMAL_TRANSITION_UP	-0.136996	0.0151727	-1.93377	0.0660079	0.300284	-4.27286
KALMA_E2F1_TARGETS	0.436065	-0.00562843	1.93298	0.0661105	0.300303	-4.27412
REACTOME_MEIOTIC_SYNAPSIS	0.220845	0.0133109	1.93269	0.0661486	0.300303	-4.27459
REACTOME_DEGRADATION_OF_BETA_CATENIN_BY_THE_DESTRUCTION_COMPLEX	0.178853	0.0140746	1.93202	0.0662357	0.300303	-4.27566
KEGG_BASE_EXCISION_REPAIR	0.250167	-0.0197712	1.93178	0.0662667	0.300303	-4.27604
PID_INTEGRIN5_PATHWAY	-0.23492	-0.00883936	-1.93127	0.0663339	0.300303	-4.27686
PYEON_HPV_POSITIVE_TUMORS_UP	0.269114	0.00713026	1.93091	0.06638	0.300303	-4.27742
REACTOME_RHO_GTPASE_EFFECTORS	0.16009	0.00254534	1.9308	0.0663944	0.300303	-4.2776
LIANG_HEMATOPOIESIS_STEM_CELL_NUMBER_LARGE_VS_TINY_DN	-0.160069	0.0185516	-1.93034	0.0664541	0.300327	-4.27833
REACTOME_HUR_ELAVL1_BINDS_AND_STABILIZES_MRNA	0.33338	0.0242526	1.92974	0.0665326	0.300434	-4.27929
TUOMISTO_TUMOR_SUPPRESSION_BY_COL13A1_UP	-0.235309	-0.0255201	-1.92927	0.0665941	0.300466	-4.28004
REACTOME_PLATELET_AGGREGATION_PLUG_FORMATION	-0.164579	-0.0144638	-1.92684	0.0669118	0.301651	-4.2839
REACTOME_CHK1_CHK2_CDS1_MEDIATED_INACTIVATION_OF_CYCLIN_B:CDK1_COMPLEX	0.332517	-0.0117645	1.92638	0.0669727	0.301679	-4.28464
BROWNE_HCMV_INFECTION_6HR_UP	0.114945	0.00845968	1.92511	0.06714	0.302072	-4.28667
REACTOME_PLATELET_ACTIVATION_SIGNALING_AND_AGGREGATION	-0.117395	-0.00535682	-1.92387	0.067303	0.302072	-4.28864
REACTOME_TRAF3_DEPENDENT_IRF_ACTIVATION_PATHWAY	0.245141	0.0027592	1.92377	0.0673161	0.302072	-4.28879
LU_AGING_BRAIN_UP	-0.138521	-0.0135337	-1.92365	0.0673323	0.302072	-4.28899
MEDINA_SMARCA4_TARGETS	0.118993	0.00995896	1.92363	0.0673346	0.302072	-4.28902
BIOCARTA_STATHMIN_PATHWAY	0.211003	-0.0129858	1.92275	0.0674515	0.30235	-4.29042
SMIRNOV_RESPONSE_TO_IR_2HR_UP	-0.167401	0.0197109	-1.91984	0.0678366	0.303828	-4.29504
REACTOME_CYTOSOLIC_SULFONATION_OF_SMALL_MOLECULES	-0.150961	0.000965592	-1.91864	0.0679962	0.304281	-4.29695
REACTOME_TRANSCRIPTIONAL_REGULATION_OF_GRANULOPOIESIS	-0.194852	0.00166252	-1.91825	0.0680483	0.304281	-4.29757
OZEN_MIR125B1_TARGETS	-0.1968	0.0169505	-1.91676	0.0682462	0.304472	-4.29993
MMS_MOUSE_LYMPH_HIGH_4HRS_UP	-0.221493	-0.00151637	-1.91656	0.0682735	0.304472	-4.30025
REACTOME_REGULATION_OF_KIT_SIGNALING	-0.200186	-0.00313152	-1.91596	0.068354	0.304472	-4.3012
KOKKINAKIS_METHIONINE_DEPRIVATION_48HR_DN	0.153873	0.000166963	1.91567	0.0683921	0.304472	-4.30166
NABA_ECM_AFFILIATED	-0.131055	-0.000405977	-1.91522	0.0684527	0.304472	-4.30237
REACTOME_REGULATION_BY_C_FLIP	0.21187	-0.00024128	1.91512	0.0684666	0.304472	-4.30254
PARK_HSC_VS_MULTIPOTENT_PROGENITORS_UP	0.237128	0.00655798	1.91503	0.0684785	0.304472	-4.30268
PUJANA_CHEK2_PCC_NETWORK	0.235984	0.00970249	1.91404	0.068611	0.304815	-4.30425
REACTOME_UCH_PROTEINASES	0.209376	0.0196441	1.91328	0.0687127	0.304993	-4.30545
NGUYEN_NOTCH1_TARGETS_DN	-0.123611	0.00956551	-1.91287	0.0687674	0.304993	-4.30609
KEGG_LEISHMANIA_INFECTION	-0.163564	0.0115256	-1.9125	0.0688176	0.304993	-4.30668
MURAKAMI_UV_RESPONSE_1HR_UP	-0.238177	0.0234591	-1.91132	0.0689771	0.305454	-4.30856
KONDO_COLON_CANCER_HCP_WITH_H3K27ME1	0.158295	0.0101774	1.91048	0.0690904	0.305558	-4.30989
FAELT_B_CLL_WITH_VH3_21_DN	-0.149182	0.00237447	-1.91032	0.0691118	0.305558	-4.31014
REACTOME_ERKS_ARE_INACTIVATED	0.28926	0.0272249	1.90918	0.0692653	0.305932	-4.31194
SHIPP_DLBCL_VS_FOLLICULAR_LYMPHOMA_UP	0.249622	0.013788	1.90778	0.0694547	0.305932	-4.31415
REACTOME_CHONDROITIN_SULFATE_BIOSYNTHESIS	-0.239295	-0.0149292	-1.90732	0.0695169	0.305932	-4.31487
VANTVEER_BREAST_CANCER_METASTASIS_UP	-0.146153	0.0149698	-1.90726	0.0695256	0.305932	-4.31498
NIKOLSKY_BREAST_CANCER_16Q24_AMPLICON	-0.160729	0.00298404	-1.90708	0.0695507	0.305932	-4.31527
REACTOME_PROCESSIVE_SYNTHESIS_ON_THE_C_STRAND_OF_THE_TELOMERE	0.433666	0.000510306	1.90614	0.0696784	0.305932	-4.31675
REACTOME_METABOLISM_OF_PORPHYRINS	0.235389	0.0113564	1.90575	0.0697314	0.305932	-4.31737
KORKOLA_EMBRYONIC_CARCINOMA_VS_SEMINOMA_DN	0.171564	0.00750495	1.90566	0.0697431	0.305932	-4.3175
REACTOME_MITOTIC_TELOPHASE_CYTOKINESIS	0.313221	-0.0131775	1.90524	0.0698001	0.305932	-4.31817
CEBALLOS_TARGETS_OF_TP53_AND_MYC_DN	-0.156102	-0.00965015	-1.90523	0.0698015	0.305932	-4.31818
KEGG_FOLATE_BIOSYNTHESIS	0.246214	0.01185	1.90518	0.0698082	0.305932	-4.31826
BIOCARTA_EIF2_PATHWAY	0.28038	-0.0411377	1.90398	0.0699716	0.306404	-4.32015
WAKASUGI_HAVE_ZNF143_BINDING_SITES	0.230759	0.00682387	1.9033	0.0700649	0.306488	-4.32123
GOLDRATH_ANTIGEN_RESPONSE	0.170177	0.00689894	1.90303	0.0701022	0.306488	-4.32166
HENDRICKS_SMARCA4_TARGETS_DN	-0.145713	-0.00609007	-1.90223	0.0702116	0.306666	-4.32292
LIU_NASOPHARYNGEAL_CARCINOMA	0.122487	-0.00580079	1.90191	0.0702544	0.306666	-4.32342
REACTOME_NOTCH4_INTRACELLULAR_DOMAIN_REGULATES_TRANSCRIPTION	-0.220401	0.0138992	-1.90128	0.070341	0.306708	-4.32441
NABA_CORE_MATRISOME	-0.162962	-0.00860018	-1.90102	0.0703769	0.306708	-4.32483
WILCOX_RESPONSE_TO_PROGESTERONE_UP	0.170665	-0.00831426	1.90062	0.0704313	0.306708	-4.32545
MARTINEZ_RESPONSE_TO_TRABECTEDIN	-0.159777	-0.00666544	-1.89943	0.0705951	0.307178	-4.32733
ZHAN_LATE_DIFFERENTIATION_GENES_UP	-0.172545	-0.00346436	-1.89899	0.0706559	0.3072	-4.32803
REACTOME_INTERLEUKIN_3_INTERLEUKIN_5_AND_GM_CSF_SIGNALING	-0.150472	0.0120385	-1.89818	0.0707678	0.307443	-4.32931
HOWLIN_CITED1_TARGETS_1_DN	-0.126877	0.0111753	-1.89769	0.0708345	0.30749	-4.33007
MORI_EMU_MYC_LYMPHOMA_BY_ONSET_TIME_UP	0.215031	0.0108779	1.89674	0.0709668	0.307822	-4.33158
BIOCARTA_PRION_PATHWAY	-0.227337	0.0209106	-1.8949	0.0712215	0.308129	-4.33448
TORCHIA_TARGETS_OF_EWSR1_FLI1_FUSION_UP	-0.103272	0.00733585	-1.89463	0.0712584	0.308129	-4.3349
FOURNIER_ACINAR_DEVELOPMENT_LATE_DN	0.309842	0.0165614	1.89448	0.0712786	0.308129	-4.33513
REACTOME_DISEASES_OF_GLYCOSYLATION	-0.145591	-0.00394189	-1.8944	0.0712909	0.308129	-4.33527
REACTOME_TRANSLATION	0.224955	0.0250095	1.8942	0.0713177	0.308129	-4.33557
OLSSON_E2F3_TARGETS_UP	-0.170961	-0.013209	-1.8933	0.0714433	0.30825	-4.33699
KIM_LIVER_CANCER_POOR_SURVIVAL_UP	-0.163662	0.0176566	-1.89239	0.0715701	0.30825	-4.33842
NABA_MATRISOME_ASSOCIATED	-0.0987305	-0.00188368	-1.89223	0.0715914	0.30825	-4.33866
HASLINGER_B_CLL_WITH_11Q23_DELETION	-0.146646	-0.00746277	-1.8921	0.0716098	0.30825	-4.33887
SPIRA_SMOKERS_LUNG_CANCER_UP	-0.153275	-0.00614392	-1.89171	0.0716647	0.30825	-4.33949
REACTOME_NUCLEAR_ENVELOPE_REASSEMBLY	0.252014	0.00372521	1.89158	0.0716822	0.30825	-4.33969
BRACHAT_RESPONSE_TO_CISPLATIN	-0.203401	0.0102037	-1.8907	0.0718052	0.308538	-4.34108
RUIZ_TNC_TARGETS_DN	0.260507	0.0131297	1.88962	0.0719562	0.308876	-4.34277
REACTOME_SHC_RELATED_EVENTS_TRIGGERED_BY_IGF1R	-0.251986	-0.00182036	-1.88933	0.0719962	0.308876	-4.34322
BERNARD_PPAPDC1B_TARGETS_DN	-0.120635	0.0121703	-1.88881	0.0720692	0.308948	-4.34404
REACTOME_DISEASES_OF_METABOLISM	-0.145957	-0.00591204	-1.88712	0.072306	0.309722	-4.34669
ROYLANCE_BREAST_CANCER_16Q_COPY_NUMBER_UP	-0.140189	0.00384811	-1.88672	0.0723631	0.309725	-4.34733
HOOI_ST7_TARGETS_DN	-0.162287	-0.00188894	-1.88467	0.072652	0.310648	-4.35055
REACTOME_EFFECTS_OF_PIP2_HYDROLYSIS	-0.159193	0.0131498	-1.88356	0.0728075	0.310648	-4.35227
REACTOME_2_LTR_CIRCLE_FORMATION	0.300338	0.00623905	1.88317	0.072863	0.310648	-4.35289
GOTTWEIN_TARGETS_OF_KSHV_MIR_K12_11	-0.116976	0.0035347	-1.88295	0.0728945	0.310648	-4.35324
BOYAULT_LIVER_CANCER_SUBCLASS_G5_DN	-0.188378	0.0118483	-1.88256	0.0729501	0.310648	-4.35385
PUJANA_XPRSS_INT_NETWORK	0.287521	0.0074981	1.88234	0.0729803	0.310648	-4.35419
ZHANG_ANTIVIRAL_RESPONSE_TO_RIBAVIRIN_DN	-0.138674	0.0170495	-1.88213	0.0730104	0.310648	-4.35452
GOLUB_ALL_VS_AML_DN	-0.210144	-0.0280926	-1.8819	0.0730428	0.310648	-4.35488
REACTOME_INTRACELLULAR_SIGNALING_BY_SECOND_MESSENGERS	0.0894653	-0.00113934	1.88159	0.073087	0.310648	-4.35537
REACTOME_METHYLATION	0.213282	0.00590124	1.87889	0.0734702	0.311373	-4.35959
REACTOME_INTRAFLAGELLAR_TRANSPORT	0.171507	0.00439685	1.87858	0.0735143	0.311373	-4.36007
WORSCHECH_TUMOR_EVASION_AND_TOLEROGENICITY_DN	-0.168403	-0.0246408	-1.87856	0.0735179	0.311373	-4.36011
REACTOME_SIGNALING_BY_BMP	-0.182349	-0.0094482	-1.87848	0.073529	0.311373	-4.36023
REACTOME_COOPERATION_OF_PREFOLDIN_AND_TRIC_CCT_IN_ACTIN_AND_TUBULIN_FOLDING	0.244998	0.0200291	1.8784	0.0735406	0.311373	-4.36036
BOQUEST_STEM_CELL_CULTURED_VS_FRESH_UP	-0.116699	-0.00729213	-1.87742	0.0736802	0.311724	-4.36189
COLINA_TARGETS_OF_4EBP1_AND_4EBP2	0.103788	-0.00129032	1.87666	0.0737885	0.311764	-4.36307
REACTOME_LONG_TERM_POTENTIATION	0.192025	0.0126036	1.87656	0.0738031	0.311764	-4.36323
BORLAK_LIVER_CANCER_EGF_UP	-0.147026	0.0113177	-1.87579	0.0739138	0.311992	-4.36444
REACTOME_RESOLUTION_OF_D_LOOP_STRUCTURES_THROUGH_SYNTHESIS_DEPENDENT_STRAND_ANNEALING_SDSA	0.260948	0.00939373	1.87453	0.0740939	0.312513	-4.36641
AMIT_EGF_RESPONSE_240_MCF10A	-0.170802	-0.0113406	-1.87406	0.0741619	0.31256	-4.36715
REACTOME_REGULATION_OF_PLK1_ACTIVITY_AT_G2_M_TRANSITION	0.197848	-0.00469494	1.87331	0.0742697	0.312596	-4.36832
GRABARCZYK_BCL11B_TARGETS_UP	-0.145297	0.00231351	-1.87308	0.0743017	0.312596	-4.36866
PID_HDAC_CLASSII_PATHWAY	0.183995	0.00052628	1.8728	0.0743421	0.312596	-4.3691
REACTOME_REGULATION_OF_IFNA_SIGNALING	0.169489	-0.000111274	1.87223	0.074424	0.312596	-4.36999
GREENBAUM_E2A_TARGETS_UP	0.362664	0.0268217	1.87202	0.0744546	0.312596	-4.37032
REACTOME_INTRA_GOLGI_TRAFFIC	-0.204309	0.018986	-1.87098	0.0746043	0.312771	-4.37194
BIOCARTA_PAR1_PATHWAY	-0.155659	0.0157229	-1.87094	0.0746101	0.312771	-4.372
IVANOVA_HEMATOPOIESIS_INTERMEDIATE_PROGENITOR	0.154793	0.0126274	1.86975	0.074782	0.313253	-4.37386
MYLLYKANGAS_AMPLIFICATION_HOT_SPOT_15	0.278319	0.0110561	1.86728	0.0751404	0.314491	-4.37771
REACTOME_BASE_EXCISION_REPAIR	0.256282	-0.000788262	1.86693	0.075192	0.314491	-4.37826
ROSS_LEUKEMIA_WITH_MLL_FUSIONS	-0.10593	0.0111173	-1.86625	0.0752902	0.314663	-4.37931
UROSEVIC_RESPONSE_TO_IMIQUIMOD	0.253538	-0.00838897	1.86435	0.0755677	0.315583	-4.38228
FOSTER_TOLERANT_MACROPHAGE_DN	-0.112799	0.00774339	-1.86345	0.0756991	0.315859	-4.38368
KRIGE_RESPONSE_TO_TOSEDOSTAT_6HR_DN	0.166911	0.00718096	1.86308	0.0757524	0.315859	-4.38424
HU_ANGIOGENESIS_UP	-0.177251	0.0146964	-1.86272	0.0758062	0.315859	-4.38482
KEGG_CHRONIC_MYELOID_LEUKEMIA	-0.141602	0.0243899	-1.86225	0.0758748	0.315906	-4.38554
CHANG_POU5F1_TARGETS_UP	-0.227073	0.00370271	-1.86099	0.0760594	0.316342	-4.3875
REACTOME_DEPURINATION	0.237615	-0.0190553	1.86051	0.0761299	0.316342	-4.38825
RICKMAN_TUMOR_DIFFERENTIATED_WELL_VS_POORLY_UP	0.171821	-0.000431637	1.8603	0.0761606	0.316342	-4.38857
VERHAAK_AML_WITH_NPM1_MUTATED_DN	-0.119502	-0.0024361	-1.85984	0.0762275	0.316342	-4.38928
VERRECCHIA_DELAYED_RESPONSE_TO_TGFB1	-0.163602	-0.00107223	-1.8594	0.0762928	0.316342	-4.38997
OSMAN_BLADDER_CANCER_UP	-0.111075	-0.00562123	-1.85918	0.0763246	0.316342	-4.3903
REACTOME_CITRIC_ACID_CYCLE_TCA_CYCLE	0.258755	0.0514447	1.85841	0.0764391	0.316578	-4.39151
NELSON_RESPONSE_TO_ANDROGEN_UP	-0.156684	-0.00236216	-1.85692	0.0766582	0.317246	-4.39381
NOUZOVA_METHYLATED_IN_APL	-0.125785	-0.0025677	-1.85567	0.0768437	0.317775	-4.39576
REACTOME_NEGATIVE_REGULATION_OF_TCF_DEPENDENT_SIGNALING_BY_WNT_LIGAND_ANTAGONISTS	0.226123	-0.000774994	1.85421	0.0770606	0.318432	-4.39802
SMID_BREAST_CANCER_RELAPSE_IN_BRAIN_DN	-0.138259	-0.00265823	-1.85329	0.0771967	0.318755	-4.39944
SHI_SPARC_TARGETS_UP	-0.238866	0.0121646	-1.85239	0.0773305	0.319029	-4.40084
XU_AKT1_TARGETS_6HR	0.222509	0.00219002	1.85207	0.077379	0.319029	-4.40134
PID_ALK1_PATHWAY	-0.135337	-0.00235289	-1.85141	0.0774773	0.31906	-4.40236
REACTOME_TRANSCRIPTION_OF_E2F_TARGETS_UNDER_NEGATIVE_CONTROL_BY_P107_RBL1_AND_P130_RBL2_IN_COMPLEX_WITH_HDAC1	0.251222	0.000899123	1.85124	0.0775025	0.31906	-4.40262
CHEN_METABOLIC_SYNDROM_NETWORK	-0.10169	0.000884238	-1.85037	0.0776327	0.31926	-4.40397
BASAKI_YBX1_TARGETS_UP	0.240779	0.0117755	1.85012	0.0776689	0.31926	-4.40435
HU_GENOTOXIN_ACTION_DIRECT_VS_INDIRECT_4HR	-0.155988	0.00570739	-1.84908	0.0778246	0.31926	-4.40596
REACTOME_PLATELET_ADHESION_TO_EXPOSED_COLLAGEN	-0.159849	-0.014541	-1.84875	0.0778749	0.31926	-4.40648
REACTOME_O_LINKED_GLYCOSYLATION	-0.14289	-0.00101216	-1.84857	0.077902	0.31926	-4.40676
ZHAN_MULTIPLE_MYELOMA_MF_DN	-0.198157	-0.0157406	-1.84829	0.0779441	0.31926	-4.40719
REACTOME_SLC_MEDIATED_TRANSMEMBRANE_TRANSPORT	-0.105837	0.00159117	-1.84807	0.0779767	0.31926	-4.40752
REACTOME_METABOLISM_OF_COFACTORS	0.206135	0.00170846	1.84781	0.0780155	0.31926	-4.40792
BIOCARTA_ARF_PATHWAY	-0.215089	-0.0043753	-1.84696	0.0781435	0.319372	-4.40924
TURJANSKI_MAPK14_TARGETS	-0.190373	0.0241439	-1.84652	0.0782095	0.319372	-4.40992
CHARAFE_BREAST_CANCER_BASAL_VS_MESENCHYMAL_UP	-0.125007	-0.000823197	-1.84638	0.0782306	0.319372	-4.41014
KEGG_GRAFT_VERSUS_HOST_DISEASE	-0.218389	-0.0193847	-1.84608	0.0782753	0.319372	-4.4106
KOINUMA_TARGETS_OF_SMAD2_OR_SMAD3	-0.0917294	-0.000625566	-1.84302	0.0787373	0.320789	-4.41532
CHICAS_RB1_TARGETS_GROWING	0.215489	0.0232992	1.84301	0.0787391	0.320789	-4.41534
COLIN_PILOCYTIC_ASTROCYTOMA_VS_GLIOBLASTOMA_DN	-0.183329	-0.0314212	-1.84027	0.0791543	0.322065	-4.41956
REACTOME_SIGNALING_BY_FGFR3_FUSIONS_IN_CANCER	-0.227112	0.00429129	-1.84011	0.0791783	0.322065	-4.41981
REACTOME_BBSOME_MEDIATED_CARGO_TARGETING_TO_CILIUM	0.214587	0.0102159	1.83976	0.0792325	0.322065	-4.42036
REACTOME_GLYCOGEN_SYNTHESIS	-0.24396	0.0166354	-1.83902	0.0793442	0.322065	-4.42149
HOLLERN_EMT_BREAST_TUMOR_UP	-0.135132	-0.000626727	-1.83902	0.0793452	0.322065	-4.4215
MYLLYKANGAS_AMPLIFICATION_HOT_SPOT_5	0.39252	-0.0319655	1.83795	0.0795079	0.322488	-4.42314
SHEPARD_CRUSH_AND_BURN_MUTANT_DN	0.156435	-0.00235975	1.8357	0.0798511	0.323641	-4.4266
THEODOROU_MAMMARY_TUMORIGENESIS	-0.161914	-0.0225216	-1.83484	0.0799843	0.323942	-4.42793
HOFMANN_MYELODYSPLASTIC_SYNDROM_RISK_DN	-0.195491	-0.00448566	-1.83343	0.0802002	0.324422	-4.4301
MIYAGAWA_TARGETS_OF_EWSR1_ETS_FUSIONS_UP	-0.0990886	0.0095052	-1.8333	0.0802208	0.324422	-4.4303
REACTOME_ACETYLCHOLINE_NEUROTRANSMITTER_RELEASE_CYCLE	-0.184604	0.0224116	-1.83151	0.0804953	0.325229	-4.43304
LINDSTEDT_DENDRITIC_CELL_MATURATION_D	-0.178323	0.0101239	-1.83123	0.0805385	0.325229	-4.43347
GINESTIER_BREAST_CANCER_ZNF217_AMPLIFIED_DN	0.148148	-0.000812966	1.83019	0.0806999	0.325642	-4.43508
KEGG_TYPE_II_DIABETES_MELLITUS	0.132561	0.00890362	1.82869	0.080932	0.326339	-4.43738
REACTOME_RESOLUTION_OF_D_LOOP_STRUCTURES	0.247824	0.0153314	1.8274	0.0811311	0.326902	-4.43935
MIKHAYLOVA_OXIDATIVE_STRESS_RESPONSE_VIA_VHL_DN	-0.243733	0.0158288	-1.82691	0.0812085	0.326943	-4.44011
REACTOME_NADE_MODULATES_DEATH_SIGNALLING	-0.263563	0.0300528	-1.82657	0.0812602	0.326943	-4.44062
PLASARI_TGFB1_SIGNALING_VIA_NFIC_10HR_DN	-0.184502	-0.0034449	-1.8261	0.0813336	0.326996	-4.44135
REACTOME_SIGNALING_BY_TGF_BETA_RECEPTOR_COMPLEX	-0.133569	0.00448002	-1.8255	0.0814272	0.326996	-4.44227
GENTILE_UV_HIGH_DOSE_UP	-0.192366	-7.42399e-05	-1.82521	0.0814729	0.326996	-4.44272
ABDELMOHSEN_ELAVL4_TARGETS	0.200924	-0.00450999	1.82487	0.0815255	0.326996	-4.44323
REACTOME_ADVANCED_GLYCOSYLATION_ENDPRODUCT_RECEPTOR_SIGNALING	-0.165955	-0.00119636	-1.82426	0.0816206	0.326996	-4.44417
GAZIN_EPIGENETIC_SILENCING_BY_KRAS	0.182039	0.0095044	1.8242	0.0816301	0.326996	-4.44426
REACTOME_SYNTHESIS_OF_15_EICOSATETRAENOIC_ACID_DERIVATIVES	0.285667	0.0329206	1.82309	0.0818027	0.327449	-4.44595
REACTOME_ANCHORING_OF_THE_BASAL_BODY_TO_THE_PLASMA_MEMBRANE	0.181981	-0.011487	1.82221	0.0819413	0.327486	-4.44731
REN_ALVEOLAR_RHABDOMYOSARCOMA_UP	0.119234	0.00883714	1.82207	0.0819625	0.327486	-4.44752
BIOCARTA_CBL_PATHWAY	-0.255859	0.00774863	-1.82189	0.0819905	0.327486	-4.44779
REACTOME_INTERLEUKIN_12_SIGNALING	0.152283	-0.0119295	1.82147	0.0820563	0.327511	-4.44843
FOURNIER_ACINAR_DEVELOPMENT_LATE_2	0.246042	0.0102366	1.82009	0.0822744	0.327595	-4.45056
LIN_APC_TARGETS	0.172948	-0.00567889	1.81971	0.0823341	0.327595	-4.45114
HERNANDEZ_ABERRANT_MITOSIS_BY_DOCETACEL_4NM_UP	-0.21064	-0.00828037	-1.81968	0.0823385	0.327595	-4.45118
DELASERNA_MYOD_TARGETS_UP	-0.104718	0.0054838	-1.81954	0.0823596	0.327595	-4.45139
REACTOME_DNA_DOUBLE_STRAND_BREAK_RESPONSE	0.134488	0.00166456	1.81944	0.0823752	0.327595	-4.45154
REACTOME_NEF_MEDIATED_CD8_DOWN_REGULATION	-0.251947	-0.0143642	-1.81897	0.0824493	0.327653	-4.45226
VERRECCHIA_RESPONSE_TO_TGFB1_C2	-0.206397	-0.011022	-1.81767	0.0826553	0.328037	-4.45425
MOOTHA_PGC	0.106191	0.00690485	1.8176	0.0826652	0.328037	-4.45435
LIM_MAMMARY_LUMINAL_PROGENITOR_DN	-0.257403	-0.0173553	-1.81721	0.0827269	0.328045	-4.45495
IIZUKA_LIVER_CANCER_PROGRESSION_L1_G1_DN	0.252074	0.0199573	1.81576	0.0829563	0.328717	-4.45716
LEE_CALORIE_RESTRICTION_MUSCLE_DN	-0.153345	-0.00710398	-1.81413	0.0832151	0.329505	-4.45965
REACTOME_REGULATION_OF_COMMISSURAL_AXON_PATHFINDING_BY_SLIT_AND_ROBO	0.237249	-0.0309944	1.81368	0.0832862	0.32955	-4.46034
ABBUD_LIF_SIGNALING_1_UP	-0.12212	-0.0149486	-1.81323	0.0833579	0.329596	-4.46103
REACTOME_BETA_CATENIN_PHOSPHORYLATION_CASCADE	0.206211	-0.00641346	1.81266	0.083449	0.32972	-4.4619
MODY_HIPPOCAMPUS_PRENATAL	0.159603	-0.00408117	1.81106	0.0837037	0.330171	-4.46434
REACTOME_PEPTIDE_HORMONE_BIOSYNTHESIS	-0.288275	-0.0157336	-1.81095	0.0837204	0.330171	-4.4645
SERVITJA_LIVER_HNF1A_TARGETS_DN	-0.0939483	-0.00304646	-1.81047	0.0837981	0.330171	-4.46524
FRASOR_TAMOXIFEN_RESPONSE_UP	-0.146928	0.0126255	-1.8101	0.0838562	0.330171	-4.46579
REACTOME_CD28_DEPENDENT_PI3K_AKT_SIGNALING	-0.161978	-0.00524965	-1.81006	0.0838635	0.330171	-4.46586
CUI_TCF21_TARGETS_2_UP	0.120586	0.00203305	1.80922	0.0839977	0.330463	-4.46714
KYNG_DNA_DAMAGE_BY_GAMMA_AND_UV_RADIATION	-0.114444	-0.0116579	-1.80815	0.0841686	0.330713	-4.46876
KANNAN_TP53_TARGETS_DN	-0.231851	0.0151404	-1.80663	0.0844129	0.330713	-4.47108
REACTOME_CELLULAR_RESPONSES_TO_STRESS	0.118174	0.00621201	1.80643	0.0844445	0.330713	-4.47138
MARTINELLI_IMMATURE_NEUTROPHIL_DN	-0.160155	0.00319863	-1.80642	0.0844465	0.330713	-4.4714
NELSON_RESPONSE_TO_ANDROGEN_DN	-0.249292	0.0072731	-1.80635	0.0844574	0.330713	-4.4715
SCHAEFFER_PROSTATE_DEVELOPMENT_48HR_UP	-0.0966972	-0.00422963	-1.8062	0.0844817	0.330713	-4.47173
REACTOME_NEURODEGENERATIVE_DISEASES	0.151108	0.00995262	1.8062	0.0844822	0.330713	-4.47173
REACTOME_RECRUITMENT_OF_NUMA_TO_MITOTIC_CENTROSOMES	0.206254	-0.00102806	1.80538	0.0846143	0.33084	-4.47298
PARK_TRETINOIN_RESPONSE	-0.202394	-0.00474736	-1.80525	0.0846348	0.33084	-4.47318
DAVIES_MULTIPLE_MYELOMA_VS_MGUS_DN	-0.261489	-0.0208166	-1.80409	0.0848221	0.331337	-4.47494
BIOCARTA_IFNG_PATHWAY	-0.3066	0.0225912	-1.80348	0.0849213	0.331488	-4.47588
PID_TCR_RAS_PATHWAY	-0.195667	0.00971445	-1.80187	0.0851803	0.331971	-4.47831
GARGALOVIC_RESPONSE_TO_OXIDIZED_PHOSPHOLIPIDS_GREEN_UP	-0.149707	0.0112806	-1.80182	0.0851886	0.331971	-4.47839
SARTIPY_NORMAL_AT_INSULIN_RESISTANCE_DN	-0.22175	-0.0158363	-1.80129	0.0852756	0.331971	-4.4792
NIKOLSKY_BREAST_CANCER_7P15_AMPLICON	-0.255983	-0.00485968	-1.80119	0.0852918	0.331971	-4.47935
REACTOME_VITAMINS	-0.28662	0.0109144	-1.80072	0.0853676	0.331971	-4.48006
PID_IL12_STAT4_PATHWAY	-0.132321	0.0083207	-1.80011	0.0854663	0.331971	-4.48098
COULOUARN_TEMPORAL_TGFB1_SIGNATURE_UP	-0.105655	0.00240682	-1.79981	0.0855144	0.331971	-4.48143
KIM_WT1_TARGETS_UP	-0.152829	0.00135404	-1.79961	0.0855469	0.331971	-4.48174
GLINSKY_CANCER_DEATH_UP	0.319759	-0.012691	1.79936	0.0855881	0.331971	-4.48212
YANG_BREAST_CANCER_ESR1_BULK_UP	-0.167638	0.0135861	-1.79896	0.0856537	0.331991	-4.48273
BIOCARTA_NPP1_PATHWAY	-0.318459	-0.00224023	-1.79817	0.0857814	0.332252	-4.48392
HUTTMANN_B_CLL_POOR_SURVIVAL_DN	-0.140256	0.00579335	-1.79724	0.085933	0.332454	-4.48533
OHM_METHYLATED_IN_ADULT_CANCERS	0.137706	0.00336291	1.79711	0.0859545	0.332454	-4.48553
SERVITJA_ISLET_HNF1A_TARGETS_UP	-0.131074	-0.00313453	-1.79615	0.0861114	0.332827	-4.48699
FONTAINE_PAPILLARY_THYROID_CARCINOMA_DN	-0.10408	0.00839544	-1.79372	0.0865105	0.334	-4.49067
LIU_VAV3_PROSTATE_CARCINOGENESIS_DN	-0.174551	-0.0190186	-1.79356	0.0865364	0.334	-4.49091
OISHI_CHOLANGIOMA_STEM_CELL_LIKE_UP	0.117446	-0.00108696	1.79269	0.0866786	0.334314	-4.49222
KOKKINAKIS_METHIONINE_DEPRIVATION_96HR_UP	-0.0984171	-0.00814409	-1.7914	0.0868919	0.334902	-4.49418
BOWIE_RESPONSE_TO_TAMOXIFEN	0.263708	0.0099067	1.78998	0.0871254	0.335567	-4.49632
PID_DNA_PK_PATHWAY	0.246555	-0.0106976	1.78907	0.0872764	0.335913	-4.4977
BERENJENO_ROCK_SIGNALING_NOT_VIA_RHOA_DN	-0.163898	-0.0081166	-1.78832	0.0873998	0.335946	-4.49883
REACTOME_RUNX2_REGULATES_GENES_INVOLVED_IN_CELL_MIGRATION	-0.296548	0.0543614	-1.78804	0.0874463	0.335946	-4.49925
APPEL_IMATINIB_RESPONSE	-0.24643	-0.026249	-1.7879	0.0874702	0.335946	-4.49947
REACTOME_FCERI_MEDIATED_MAPK_ACTIVATION	0.140982	0.00723736	1.78749	0.0875373	0.335946	-4.50008
REACTOME_ANTIGEN_PRESENTATION:_FOLDING_ASSEMBLY_AND_PEPTIDE_LOADING_OF_CLASS_I_MHC	-0.200745	-0.00685194	-1.78707	0.0876067	0.335946	-4.50071
BIOCARTA_AHSP_PATHWAY	0.245146	0.0333879	1.7863	0.0877347	0.335946	-4.50187
REACTOME_HEDGEHOG_ON_STATE	0.166551	0.0123866	1.78596	0.0877918	0.335946	-4.50239
STARK_PREFRONTAL_CORTEX_22Q11_DELETION_DN	0.134538	0.00478989	1.78563	0.0878461	0.335946	-4.50288
HOOI_ST7_TARGETS_UP	-0.141768	0.0103911	-1.78502	0.0879489	0.335946	-4.50382
REACTOME_IRAK4_DEFICIENCY_TLR2_4	-0.275213	0.00487322	-1.78492	0.0879648	0.335946	-4.50396
REACTOME_DEGRADATION_OF_DVL	0.235827	0.0281986	1.78486	0.0879755	0.335946	-4.50406
MEISSNER_NPC_HCP_WITH_H3K4ME3_AND_H3K27ME3	0.112901	-0.00563494	1.7846	0.0880178	0.335946	-4.50444
WEBER_METHYLATED_IN_COLON_CANCER	-0.202641	0.0108382	-1.78397	0.0881227	0.335969	-4.50539
MUNSHI_MULTIPLE_MYELOMA_DN	0.2293	0.00119529	1.78383	0.088146	0.335969	-4.5056
REACTOME_RUNX2_REGULATES_BONE_DEVELOPMENT	-0.158743	-0.0065577	-1.78211	0.0884335	0.336655	-4.50819
BONOME_OVARIAN_CANCER_POOR_SURVIVAL_UP	-0.215773	-0.000331884	-1.78202	0.0884484	0.336655	-4.50833
REACTOME_CROSS_PRESENTATION_OF_PARTICULATE_EXOGENOUS_ANTIGENS_PHAGOSOMES	-0.298524	0.015555	-1.78002	0.0887839	0.337698	-4.51134
BERTUCCI_MEDULLARY_VS_DUCTAL_BREAST_CANCER_DN	-0.163014	-0.0166175	-1.77912	0.0889353	0.337854	-4.5127
SMID_BREAST_CANCER_RELAPSE_IN_BRAIN_UP	0.12784	0.00754704	1.77887	0.0889764	0.337854	-4.51306
SHEPARD_BMYB_MORPHOLINO_DN	0.154841	0.00196704	1.77868	0.0890091	0.337854	-4.51336
PID_PS1_PATHWAY	0.136058	0.0150704	1.77672	0.08934	0.338785	-4.51631
REACTOME_ATTENUATION_PHASE	-0.196284	0.00431685	-1.77649	0.0893777	0.338785	-4.51664
REACTOME_METABOLISM_OF_NUCLEOTIDES	0.178401	0.0266402	1.77507	0.0896186	0.339242	-4.51879
GEORGES_CELL_CYCLE_MIR192_TARGETS	0.221675	-0.00179073	1.77472	0.0896767	0.339242	-4.5193
BONCI_TARGETS_OF_MIR15A_AND_MIR16_1	-0.117927	0.00523977	-1.7745	0.0897152	0.339242	-4.51964
YAO_TEMPORAL_RESPONSE_TO_PROGESTERONE_CLUSTER_13	0.171433	0.0120482	1.77394	0.0898093	0.339242	-4.52048
ABRAHAM_ALPC_VS_MULTIPLE_MYELOMA_UP	-0.159281	0.00456815	-1.77384	0.0898265	0.339242	-4.52063
MYLLYKANGAS_AMPLIFICATION_HOT_SPOT_16	0.203046	0.00540762	1.77359	0.0898682	0.339242	-4.521
CHESLER_BRAIN_D6MIT150_QTL_CIS	-0.326493	0.0187084	-1.77277	0.0900088	0.339418	-4.52224
KEGG_MISMATCH_REPAIR	0.31515	0.00841246	1.77255	0.0900451	0.339418	-4.52256
KOKKINAKIS_METHIONINE_DEPRIVATION_96HR_DN	0.169147	-0.00255124	1.77223	0.0901002	0.339418	-4.52305
VERNELL_RETINOBLASTOMA_PATHWAY_UP	0.28931	0.00637468	1.77153	0.0902189	0.339633	-4.52409
BIOCARTA_MCM_PATHWAY	0.286943	0.00427796	1.7709	0.0903268	0.339807	-4.52504
REACTOME_GLOBAL_GENOME_NUCLEOTIDE_EXCISION_REPAIR_GG_NER	0.181505	0.0127163	1.76958	0.0905513	0.339957	-4.52702
DAZARD_UV_RESPONSE_CLUSTER_G1	-0.120546	0.00251009	-1.76947	0.0905695	0.339957	-4.52718
MULLIGAN_NTF3_SIGNALING_VIA_INSR_AND_IGF1R_DN	-0.221955	-0.00418185	-1.76932	0.0905963	0.339957	-4.52741
ONDER_CDH1_TARGETS_2_DN	-0.0948608	0.00362219	-1.7691	0.0906336	0.339957	-4.52774
REACTOME_COPI_MEDIATED_ANTEROGRADE_TRANSPORT	-0.206415	0.018039	-1.76885	0.0906758	0.339957	-4.52811
REACTOME_INHIBITION_OF_THE_PROTEOLYTIC_ACTIVITY_OF_APC_C_REQUIRED_FOR_THE_ONSET_OF_ANAPHASE_BY_MITOTIC_SPINDLE_CHECKPOINT_COMPONENTS	0.241262	-0.00420399	1.76774	0.0908661	0.340439	-4.52977
REACTOME_DEGRADATION_OF_CYSTEINE_AND_HOMOCYSTEINE	0.221512	0.029034	1.76684	0.0910208	0.340563	-4.53113
REACTOME_INTERLEUKIN_15_SIGNALING	-0.252225	-0.0149816	-1.76657	0.0910672	0.340563	-4.53153
REACTOME_CENTROSOME_MATURATION	0.202852	-0.00299358	1.7662	0.0911292	0.340563	-4.53207
KYNG_RESPONSE_TO_H2O2	-0.112684	-0.0111265	-1.7661	0.0911471	0.340563	-4.53223
BROWNE_INTERFERON_RESPONSIVE_GENES	0.221339	-0.024586	1.76337	0.0916176	0.342088	-4.53632
LINSLEY_MIR16_TARGETS	-0.145543	0.00918535	-1.76301	0.0916795	0.342088	-4.53685
REACTOME_PREFOLDIN_MEDIATED_TRANSFER_OF_SUBSTRATE_TO_CCT_TRIC	0.234668	0.0135234	1.76255	0.0917576	0.342147	-4.53753
OSWALD_HEMATOPOIETIC_STEM_CELL_IN_COLLAGEN_GEL_DN	-0.0927221	0.000861325	-1.76104	0.0920201	0.342893	-4.5398
TOYOTA_TARGETS_OF_MIR34B_AND_MIR34C	0.171243	-0.00269118	1.75961	0.0922676	0.343388	-4.54193
OHM_EMBRYONIC_CARCINOMA_UP	0.21414	-0.0219456	1.75955	0.0922778	0.343388	-4.54201
RUTELLA_RESPONSE_TO_CSF2RB_AND_IL4_UP	-0.10222	0.00216753	-1.75915	0.0923475	0.343415	-4.54261
PECE_MAMMARY_STEM_CELL_DN	-0.153178	-0.000669515	-1.758	0.0925467	0.343923	-4.54432
REACTOME_SPHINGOLIPID_METABOLISM	-0.155868	-0.00484969	-1.75718	0.092689	0.344105	-4.54554
HASEGAWA_TUMORIGENESIS_BY_RET_C634R	0.315874	-0.0156912	1.757	0.0927206	0.344105	-4.54581
BIOCARTA_BLYMPHOCYTE_PATHWAY	-0.2853	0.01616	-1.7554	0.0930005	0.344911	-4.5482
FEVR_CTNNB1_TARGETS_UP	-0.105474	-0.000197473	-1.7542	0.0932097	0.345291	-4.54999
SCHRAETS_MLL_TARGETS_UP	-0.222998	-0.00475221	-1.75381	0.0932788	0.345291	-4.55057
REACTOME_MAPK6_MAPK4_SIGNALING	0.17165	0.015099	1.75374	0.0932914	0.345291	-4.55068
REACTOME_RESOLUTION_OF_ABASIC_SITES_AP_SITES	0.26567	-0.00227112	1.75244	0.093518	0.345897	-4.5526
NADERI_BREAST_CANCER_PROGNOSIS_UP	0.234565	0.00527432	1.75145	0.0936926	0.34631	-4.55408
MASRI_RESISTANCE_TO_TAMOXIFEN_AND_AROMATASE_INHIBITORS_UP	-0.211305	-0.011716	-1.75009	0.0939323	0.346676	-4.55611
FIGUEROA_AML_METHYLATION_CLUSTER_3_DN	0.163442	0.00343678	1.74988	0.0939683	0.346676	-4.55641
REACTOME_MITOCHONDRIAL_CALCIUM_ION_TRANSPORT	0.148653	0.000305811	1.74981	0.0939807	0.346676	-4.55651
ALCALAY_AML_BY_NPM1_LOCALIZATION_DN	0.149977	-4.74751e-05	1.74925	0.0940798	0.346809	-4.55735
WINTER_HYPOXIA_DN	-0.16123	-0.0165382	-1.74878	0.0941632	0.346884	-4.55805
GAURNIER_PSMD4_TARGETS	-0.185496	-0.016726	-1.74815	0.094274	0.347044	-4.55898
KEGG_CYSTEINE_AND_METHIONINE_METABOLISM	0.163927	-0.0118409	1.74782	0.0943329	0.347044	-4.55948
DANG_REGULATED_BY_MYC_UP	0.168121	0.0042674	1.747	0.0944785	0.347347	-4.5607
REACTOME_RESPIRATORY_ELECTRON_TRANSPORT_ATP_SYNTHESIS_BY_CHEMIOSMOTIC_COUPLING_AND_HEAT_PRODUCTION_BY_UNCOUPLING_PROTEINS	0.191897	0.00131068	1.74621	0.094618	0.347482	-4.56187
RODRIGUES_DCC_TARGETS_UP	-0.341527	0.0205105	-1.74608	0.0946414	0.347482	-4.56206
REACTOME_RHO_GTPASES_ACTIVATE_IQGAPS	0.217675	0.00933396	1.74391	0.0950267	0.34855	-4.56528
REACTOME_EXTENSION_OF_TELOMERES	0.324695	0.00623314	1.74341	0.0951148	0.34855	-4.56601
REACTOME_FRUCTOSE_CATABOLISM	-0.27901	0.00912798	-1.74337	0.0951225	0.34855	-4.56608
SCHLOSSER_MYC_TARGETS_AND_SERUM_RESPONSE_DN	0.250588	0.0288968	1.7429	0.0952063	0.348623	-4.56677
KEGG_GLYCOSAMINOGLYCAN_DEGRADATION	-0.235183	-0.00445028	-1.74255	0.0952692	0.348623	-4.5673
BENPORATH_ES_2	0.213513	0.013496	1.74153	0.0954507	0.348905	-4.5688
REACTOME_P75NTR_RECRUITS_SIGNALLING_COMPLEXES	-0.227579	-0.00572852	-1.74139	0.0954748	0.348905	-4.569
GALE_APL_WITH_FLT3_MUTATED_DN	0.184629	0.00395114	1.74099	0.0955462	0.348905	-4.56959
LEE_LIVER_CANCER_SURVIVAL_DN	0.214955	0.00312846	1.74055	0.0956259	0.348905	-4.57025
WANG_LSD1_TARGETS_DN	-0.176523	0.00375811	-1.74034	0.0956635	0.348905	-4.57057
REACTOME_TRANSCRIPTIONAL_ACTIVATION_OF_MITOCHONDRIAL_BIOGENESIS	0.148123	-0.0146175	1.73947	0.0958186	0.34924	-4.57185
FLORIO_HUMAN_NEOCORTEX	0.157525	-0.0157896	1.73775	0.0961271	0.350132	-4.57439
MOOTHA_ROS	0.329809	-0.00939942	1.73591	0.0964583	0.351106	-4.57711
RASHI_RESPONSE_TO_IONIZING_RADIATION_1	0.124639	0.00829778	1.7341	0.0967849	0.351701	-4.57978
GOLDRATH_IMMUNE_MEMORY	-0.105068	-4.69733e-05	-1.73365	0.0968667	0.351701	-4.58045
REACTOME_RESPIRATORY_ELECTRON_TRANSPORT	0.195338	-0.000612134	1.73356	0.0968826	0.351701	-4.58058
REACTOME_PLASMA_LIPOPROTEIN_REMODELING	-0.174825	0.00172638	-1.7334	0.0969118	0.351701	-4.58082
KEGG_ALLOGRAFT_REJECTION	-0.213104	-0.0211314	-1.7332	0.0969485	0.351701	-4.58112
PUJANA_BRCA_CENTERED_NETWORK	0.267829	0.00715052	1.73265	0.0970474	0.351701	-4.58192
BIOCARTA_AKAP95_PATHWAY	0.211019	0.00528855	1.73202	0.0971614	0.351701	-4.58285
PID_P38_ALPHA_BETA_PATHWAY	0.151107	0.00255472	1.73202	0.097162	0.351701	-4.58285
REACTOME_PRC2_METHYLATES_HISTONES_AND_DNA	0.268605	-0.00220783	1.73164	0.0972303	0.351701	-4.58341
DACOSTA_UV_RESPONSE_VIA_ERCC3_DN	-0.13284	0.00278672	-1.73147	0.0972614	0.351701	-4.58366
KYNG_WERNER_SYNDROM_DN	-0.18544	0.0330154	-1.73098	0.0973503	0.351772	-4.58438
RADAEVA_RESPONSE_TO_IFNA1_UP	0.191034	-0.0122189	1.73066	0.0974088	0.351772	-4.58486
KRISHNAN_FURIN_TARGETS_UP	0.208818	-0.0117299	1.72844	0.0978138	0.353002	-4.58813
REACTOME_MECP2_REGULATES_TRANSCRIPTION_FACTORS	-0.287646	-0.0106605	-1.72674	0.0981235	0.353624	-4.59063
SHARMA_PILOCYTIC_ASTROCYTOMA_LOCATION_DN	0.30313	-0.0338675	1.72616	0.0982297	0.353624	-4.59148
GILDEA_METASTASIS	-0.161693	-0.00865027	-1.72599	0.0982605	0.353624	-4.59173
REACTOME_METABOLISM_OF_POLYAMINES	0.271108	0.0287995	1.72578	0.0982999	0.353624	-4.59205
REACTOME_SIGNALLING_TO_P38_VIA_RIT_AND_RIN	-0.315881	0.0121503	-1.72574	0.0983076	0.353624	-4.59211
BILD_CTNNB1_ONCOGENIC_SIGNATURE	-0.132592	0.00223304	-1.72506	0.0984305	0.353835	-4.5931
REACTOME_TRNA_MODIFICATION_IN_THE_NUCLEUS_AND_CYTOSOL	0.202025	-0.00639296	1.72199	0.0989948	0.355366	-4.59761
KEGG_PROPANOATE_METABOLISM	0.193635	-0.00525197	1.72161	0.0990658	0.355366	-4.59817
NUYTTEN_EZH2_TARGETS_DN	0.152229	0.00944428	1.72133	0.0991175	0.355366	-4.59858
DAVICIONI_MOLECULAR_ARMS_VS_ERMS_UP	-0.105286	-0.0045072	-1.72113	0.0991548	0.355366	-4.59888
GOBERT_OLIGODENDROCYTE_DIFFERENTIATION_DN	-0.0958414	-0.000154258	-1.72099	0.0991794	0.355366	-4.59908
REACTOME_SIGNALING_BY_TGF_BETA_FAMILY_MEMBERS	-0.120457	0.00880893	-1.7193	0.0994918	0.355658	-4.60156
DELYS_THYROID_CANCER_DN	-0.0989432	-0.00171795	-1.71914	0.0995224	0.355658	-4.6018
BENNETT_SYSTEMIC_LUPUS_ERYTHEMATOSUS	0.205529	-0.0334932	1.71897	0.0995542	0.355658	-4.60205
TAGHAVI_NEOPLASTIC_TRANSFORMATION	0.188922	-0.0177451	1.71814	0.0997067	0.355658	-4.60326
JOSEPH_RESPONSE_TO_SODIUM_BUTYRATE_DN	-0.136952	-0.00521104	-1.71798	0.0997371	0.355658	-4.6035
REACTOME_MITOCHONDRIAL_IRON_SULFUR_CLUSTER_BIOGENESIS	0.237588	-0.0130159	1.71781	0.0997689	0.355658	-4.60375
RAO_BOUND_BY_SALL4_ISOFORM_B	-0.0817461	0.00748535	-1.71778	0.0997742	0.355658	-4.60379
REACTOME_MEIOSIS	0.202114	0.00878007	1.71776	0.0997782	0.355658	-4.60382
SARTIPY_BLUNTED_BY_INSULIN_RESISTANCE_DN	-0.217995	-0.0183234	-1.71726	0.0998696	0.355753	-4.60455
GARGALOVIC_RESPONSE_TO_OXIDIZED_PHOSPHOLIPIDS_MAGENTA_UP	-0.181315	0.010079	-1.71682	0.0999524	0.355818	-4.6052
GAVIN_FOXP3_TARGETS_CLUSTER_P2	-0.103761	0.00496899	-1.71627	0.100054	0.35595	-4.606
PLASARI_TGFB1_SIGNALING_VIA_NFIC_10HR_UP	-0.148254	-0.0021669	-1.71538	0.10022	0.356311	-4.60731
NIKOLSKY_BREAST_CANCER_16P13_AMPLICON	0.129421	-0.000296063	1.71252	0.100754	0.357977	-4.61149
REACTOME_ION_CHANNEL_TRANSPORT	-0.135163	-0.00881199	-1.71052	0.101129	0.358987	-4.61442
RAFFEL_VEGFA_TARGETS_UP	0.241231	-0.0133391	1.7103	0.101169	0.358987	-4.61473
REACTOME_CONDENSATION_OF_PROPHASE_CHROMOSOMES	0.330489	0.0112384	1.70984	0.101256	0.359063	-4.6154
KIM_WT1_TARGETS_8HR_UP	-0.134506	0.00748891	-1.70888	0.101437	0.359472	-4.61681
REACTOME_APC_C:CDH1_MEDIATED_DEGRADATION_OF_CDC20_AND_OTHER_APC_C:CDH1_TARGETED_PROTEINS_IN_LATE_MITOSIS_EARLY_G1	0.223761	0.0220524	1.7077	0.101659	0.359499	-4.61853
PID_MAPK_TRK_PATHWAY	-0.121947	0.000186397	-1.70758	0.101682	0.359499	-4.61871
PILON_KLF1_TARGETS_UP	-0.0922275	-0.00298946	-1.70756	0.101686	0.359499	-4.61874
PID_IL8_CXCR1_PATHWAY	-0.165776	-0.00819078	-1.70745	0.101706	0.359499	-4.61889
TERAMOTO_OPN_TARGETS_CLUSTER_4	-0.154467	-0.00340154	-1.70586	0.102006	0.36033	-4.62122
TARTE_PLASMA_CELL_VS_PLASMABLAST_DN	0.213744	0.0163796	1.70407	0.102346	0.360954	-4.62383
RORIE_TARGETS_OF_EWSR1_FLI1_FUSION_DN	0.122888	-0.00994327	1.70351	0.10245	0.360954	-4.62463
KORKOLA_CHORIOCARCINOMA_DN	-0.195468	0.0175232	-1.70349	0.102455	0.360954	-4.62467
REACTOME_FORMATION_OF_TUBULIN_FOLDING_INTERMEDIATES_BY_CCT_TRIC	0.243738	0.00743799	1.70338	0.102476	0.360954	-4.62483
DUNNE_TARGETS_OF_AML1_MTG8_FUSION_DN	-0.132443	-0.00412976	-1.70315	0.10252	0.360954	-4.62517
KOBAYASHI_RESPONSE_TO_ROMIDEPSIN	-0.191819	-0.0126699	-1.70285	0.102577	0.360954	-4.6256
REACTOME_WNT5A_DEPENDENT_INTERNALIZATION_OF_FZD2_FZD5_AND_ROR2	-0.173874	0.00761188	-1.70237	0.102668	0.361044	-4.6263
GRAESSMANN_RESPONSE_TO_MC_AND_DOXORUBICIN_DN	0.119765	0.00600235	1.70153	0.102828	0.361375	-4.62753
REACTOME_THE_CITRIC_ACID_TCA_CYCLE_AND_RESPIRATORY_ELECTRON_TRANSPORT	0.158945	0.0102183	1.69989	0.103141	0.362199	-4.62991
REACTOME_PURINE_CATABOLISM	0.192399	0.024806	1.69961	0.103194	0.362199	-4.63032
REACTOME_SUMOYLATION_OF_TRANSCRIPTION_FACTORS	0.152529	0.0263658	1.69919	0.103275	0.362252	-4.63094
MCCABE_HOXC6_TARGETS_DN	-0.165274	0.00684198	-1.69687	0.103717	0.363513	-4.6343
REACTOME_DAP12_INTERACTIONS	-0.11641	0.00975544	-1.69662	0.103767	0.363513	-4.63467
REACTOME_SIGNALING_BY_NTRK2_TRKB	-0.167256	-0.00239495	-1.69537	0.104006	0.363884	-4.63648
BUYTAERT_PHOTODYNAMIC_THERAPY_STRESS_DN	0.109542	0.00941239	1.69475	0.104125	0.363884	-4.63738
REACTOME_N_GLYCAN_ANTENNAE_ELONGATION_IN_THE_MEDIAL_TRANS_GOLGI	-0.178776	-0.00988847	-1.69448	0.104177	0.363884	-4.63777
HOWLIN_CITED1_TARGETS_1_UP	-0.129452	0.0108381	-1.69417	0.104236	0.363884	-4.63821
REACTOME_EPH_EPHRIN_SIGNALING	-0.112737	0.0154192	-1.69392	0.104284	0.363884	-4.63858
REACTOME_SCAVENGING_BY_CLASS_A_RECEPTORS	-0.23963	0.0145249	-1.6939	0.104289	0.363884	-4.63861
REACTOME_FCERI_MEDIATED_NF_KB_ACTIVATION	0.167112	0.000215403	1.69366	0.104335	0.363884	-4.63896
LEE_AGING_NEOCORTEX_UP	-0.116036	0.00345889	-1.69274	0.104512	0.364205	-4.64029
FLECHNER_PBL_KIDNEY_TRANSPLANT_OK_VS_DONOR_DN	-0.184931	0.000225202	-1.69195	0.104665	0.364205	-4.64144
REACTOME_STABILIZATION_OF_P53	0.229594	0.0347552	1.69182	0.10469	0.364205	-4.64163
REACTOME_FANCONI_ANEMIA_PATHWAY	0.201188	0.0110634	1.69152	0.104747	0.364205	-4.64205
GAUSSMANN_MLL_AF4_FUSION_TARGETS_E_UP	-0.130207	-0.00741286	-1.69123	0.104804	0.364205	-4.64248
BERENJENO_TRANSFORMED_BY_RHOA_DN	-0.15233	-0.0127638	-1.69112	0.104825	0.364205	-4.64264
LINDSTEDT_DENDRITIC_CELL_MATURATION_A	-0.157049	0.00452811	-1.69026	0.104992	0.364554	-4.64388
REACTOME_ADAPTIVE_IMMUNE_SYSTEM	-0.0740919	0.00294178	-1.68915	0.105206	0.365068	-4.64549
FRIDMAN_SENESCENCE_UP	-0.13262	0.00394504	-1.68825	0.105381	0.365379	-4.64679
EBAUER_MYOGENIC_TARGETS_OF_PAX3_FOXO1_FUSION	-0.192418	0.00417394	-1.68801	0.105428	0.365379	-4.64714
SA_REG_CASCADE_OF_CYCLIN_EXPR	0.176058	-0.0115633	1.68663	0.105696	0.365947	-4.64913
REACTOME_TP53_REGULATES_TRANSCRIPTION_OF_DNA_REPAIR_GENES	0.182295	0.00278616	1.68648	0.105725	0.365947	-4.64935
BERENJENO_TRANSFORMED_BY_RHOA_UP	0.201598	0.006683	1.68554	0.105909	0.365981	-4.65071
ASTIER_INTEGRIN_SIGNALING	0.0891905	0.0112695	1.68538	0.10594	0.365981	-4.65094
KEGG_PROGESTERONE_MEDIATED_OOCYTE_MATURATION	0.127298	0.00782719	1.68525	0.105966	0.365981	-4.65113
CROSBY_E2F4_TARGETS	0.390849	0.0183248	1.68507	0.106001	0.365981	-4.65139
SAMOLS_TARGETS_OF_KHSV_MIRNAS_DN	-0.148424	-0.0064798	-1.6838	0.106249	0.366453	-4.65322
RIGGI_EWING_SARCOMA_PROGENITOR_UP	-0.104586	-0.00317483	-1.68366	0.106278	0.366453	-4.65343
LU_EZH2_TARGETS_DN	-0.116489	0.00258874	-1.68335	0.106338	0.366453	-4.65388
REACTOME_DOWNSTREAM_SIGNALING_OF_ACTIVATED_FGFR1	-0.150298	0.00759357	-1.68194	0.106613	0.367171	-4.65591
BILD_MYC_ONCOGENIC_SIGNATURE	0.123635	0.0191661	1.68055	0.106888	0.367715	-4.65792
VANHARANTA_UTERINE_FIBROID_UP	-0.156592	-0.0120815	-1.68046	0.106905	0.367715	-4.65805
PHESSE_TARGETS_OF_APC_AND_MBD2_UP	-0.23184	-0.00496105	-1.67969	0.107055	0.368003	-4.65915
REACTOME_CRISTAE_FORMATION	0.160169	0.0024255	1.67911	0.107171	0.36817	-4.65999
WANG_THOC1_TARGETS_UP	0.242182	0.0198118	1.67874	0.107244	0.36819	-4.66053
LIU_CMYB_TARGETS_UP	-0.0852014	-0.00571465	-1.67521	0.107942	0.370146	-4.66561
HELLER_HDAC_TARGETS_SILENCED_BY_METHYLATION_UP	-0.090515	-0.000546893	-1.67518	0.107948	0.370146	-4.66565
BIOCARTA_PLCD_PATHWAY	-0.272398	0.00402526	-1.67407	0.108169	0.370671	-4.66725
REACTOME_P75NTR_SIGNALS_VIA_NF_KB	-0.210267	0.00854534	-1.67265	0.10845	0.371196	-4.66928
MATTIOLI_MGUS_VS_MULTIPLE_MYELOMA	0.201967	-0.00458682	1.67246	0.108488	0.371196	-4.66956
WINTER_HYPOXIA_METAGENE	-0.14261	0.00831507	-1.67228	0.108524	0.371196	-4.66982
TURASHVILI_BREAST_LOBULAR_CARCINOMA_VS_LOBULAR_NORMAL_DN	-0.164879	-0.0102533	-1.67024	0.10893	0.372353	-4.67274
REACTOME_IRON_UPTAKE_AND_TRANSPORT	-0.197966	-0.0067004	-1.66852	0.109275	0.373142	-4.67521
REACTOME_RECYCLING_OF_EIF2:GDP	0.327562	0.0167627	1.66823	0.109334	0.373142	-4.67563
KINSEY_TARGETS_OF_EWSR1_FLII_FUSION_UP	0.184848	0.00465401	1.66808	0.109364	0.373142	-4.67585
REACTOME_DEUBIQUITINATION	0.103659	0.00363072	1.6677	0.10944	0.373169	-4.67639
RIZKI_TUMOR_INVASIVENESS_2D_DN	-0.101081	0.0112849	-1.66548	0.109885	0.374367	-4.67956
PHONG_TNF_RESPONSE_VIA_P38_COMPLETE	-0.0966818	0.00859681	-1.66527	0.109928	0.374367	-4.67987
MCCABE_HOXC6_TARGETS_UP	-0.234869	-0.0115438	-1.6648	0.110022	0.374457	-4.68054
CHIARADONNA_NEOPLASTIC_TRANSFORMATION_CDC25_UP	-0.133191	-0.0107077	-1.66311	0.110363	0.375384	-4.68295
DACOSTA_UV_RESPONSE_VIA_ERCC3_TTD_UP	0.130899	-0.00528804	1.66232	0.110523	0.37553	-4.68409
REACTOME_TRANSPORT_OF_SMALL_MOLECULES	-0.0819553	-0.00413671	-1.66211	0.110565	0.37553	-4.68439
WONG_MITOCHONDRIA_GENE_MODULE	0.163007	0.00475158	1.66189	0.110611	0.37553	-4.6847
YANG_BREAST_CANCER_ESR1_UP	-0.163134	-0.0114054	-1.66097	0.110797	0.37593	-4.68602
LANDIS_ERBB2_BREAST_TUMORS_324_UP	-0.0908627	0.00406916	-1.66046	0.110901	0.37605	-4.68675
BIOCARTA_IL2RB_PATHWAY	-0.142933	-0.0136215	-1.65976	0.111043	0.376301	-4.68775
YAO_TEMPORAL_RESPONSE_TO_PROGESTERONE_CLUSTER_17	0.162873	0.0221474	1.65886	0.111227	0.376576	-4.68904
BIOCARTA_IFNA_PATHWAY	0.218267	0.0354369	1.65869	0.111261	0.376576	-4.68928
RHODES_UNDIFFERENTIATED_CANCER	0.261314	0.0112179	1.65736	0.111532	0.37726	-4.69118
ICHIBA_GRAFT_VERSUS_HOST_DISEASE_D7_UP	-0.12941	0.0198558	-1.65641	0.111725	0.377507	-4.69253
REACTOME_DEGRADATION_OF_GLI1_BY_THE_PROTEASOME	0.216894	0.0223638	1.65633	0.111742	0.377507	-4.69265
MIDORIKAWA_AMPLIFIED_IN_LIVER_CANCER	0.146907	0.00303088	1.6552	0.111971	0.37805	-4.69425
FARMER_BREAST_CANCER_CLUSTER_8	0.294955	0.000758118	1.65442	0.112133	0.378362	-4.69537
MITSIADES_RESPONSE_TO_APLIDIN_DN	0.192929	0.00483481	1.65383	0.112252	0.378432	-4.6962
TONKS_TARGETS_OF_RUNX1_RUNX1T1_FUSION_HSC_UP	-0.107999	-0.0058722	-1.65364	0.112291	0.378432	-4.69647
REACTOME_GLYCOSPHINGOLIPID_METABOLISM	-0.194585	-0.0183227	-1.65299	0.112426	0.378496	-4.69741
BIOCARTA_LAIR_PATHWAY	0.19282	-0.0100607	1.65288	0.112448	0.378496	-4.69756
PID_S1P_S1P3_PATHWAY	-0.144766	-0.00484276	-1.65218	0.112592	0.37875	-4.69856
COLDREN_GEFITINIB_RESISTANCE_UP	0.125597	0.0169355	1.65088	0.112858	0.379413	-4.7004
TARTE_PLASMA_CELL_VS_PLASMABLAST_UP	-0.106189	-0.00590536	-1.65022	0.112995	0.379641	-4.70134
REACTOME_LIGAND_RECEPTOR_INTERACTIONS	-0.253679	0.0147943	-1.64986	0.11307	0.37966	-4.70186
REACTOME_SIGNALING_BY_INSULIN_RECEPTOR	-0.142445	-0.00703736	-1.64944	0.113155	0.379716	-4.70245
ZERBINI_RESPONSE_TO_SULINDAC_DN	0.320674	0.0424033	1.6456	0.11395	0.382051	-4.70791
REACTOME_POU5F1_OCT4_SOX2_NANOG_REPRESS_GENES_RELATED_TO_DIFFERENTIATION	-0.190573	-0.0151906	-1.64541	0.11399	0.382051	-4.70818
SMID_BREAST_CANCER_BASAL_UP	0.102485	-0.00275894	1.64464	0.11415	0.382299	-4.70927
REACTOME_GAMMA_CARBOXYLATION_TRANSPORT_AND_AMINO_TERMINAL_CLEAVAGE_OF_PROTEINS	-0.199057	-0.0448291	-1.64439	0.114203	0.382299	-4.70963
BIOCARTA_PDGF_PATHWAY	-0.172015	-0.019656	-1.64381	0.114322	0.382464	-4.71044
GAUSSMANN_MLL_AF4_FUSION_TARGETS_E_DN	-0.149444	0.00235661	-1.64312	0.114467	0.382482	-4.71143
REACTOME_VIF_MEDIATED_DEGRADATION_OF_APOBEC3G	0.239711	0.0321379	1.64302	0.114487	0.382482	-4.71156
APPIERTO_RESPONSE_TO_FENRETINIDE_UP	-0.130715	-0.0057082	-1.64275	0.114544	0.382482	-4.71195
FLECHNER_BIOPSY_KIDNEY_TRANSPLANT_OK_VS_DONOR_UP	-0.0959512	-0.00561825	-1.64245	0.114605	0.382482	-4.71237
PEDRIOLI_MIR31_TARGETS_DN	-0.0927737	-0.00331056	-1.64174	0.114754	0.382648	-4.71338
KEGG_RNA_DEGRADATION	0.158653	0.00312138	1.64155	0.114794	0.382648	-4.71365
TAVAZOIE_METASTASIS	-0.110281	-2.83215e-05	-1.6389	0.115349	0.384263	-4.7174
NAKAJIMA_EOSINOPHIL	-0.159264	-0.0250439	-1.63851	0.115431	0.384305	-4.71795
LIU_VMYB_TARGETS_UP	-0.0953046	-0.00232664	-1.6378	0.115579	0.384493	-4.71895
REACTOME_BIOSYNTHESIS_OF_MARESIN_LIKE_SPMS	0.223701	-0.024315	1.63688	0.115774	0.384493	-4.72026
HERNANDEZ_MITOTIC_ARREST_BY_DOCETAXEL_2_UP	-0.100185	-0.00163925	-1.63674	0.115803	0.384493	-4.72045
SPIELMAN_LYMPHOBLAST_EUROPEAN_VS_ASIAN_2FC_DN	-0.168229	-0.0125202	-1.63672	0.115806	0.384493	-4.72047
ZWANG_EGF_INTERVAL_UP	-0.0922549	-0.00439392	-1.63657	0.115837	0.384493	-4.72068
MATHEW_FANCONI_ANEMIA_GENES	0.289256	0.0201885	1.63523	0.11612	0.3852	-4.72258
WINTER_HYPOXIA_UP	0.174092	0.00784536	1.63271	0.116654	0.386464	-4.72615
LEE_METASTASIS_AND_ALTERNATIVE_SPLICING_DN	-0.135093	0.0238599	-1.63126	0.11696	0.386464	-4.72818
REACTOME_HDR_THROUGH_MMEJ_ALT_NHEJ	0.317375	0.0293562	1.63113	0.116987	0.386464	-4.72836
BOSCO_TH1_CYTOTOXIC_MODULE	-0.102237	0.00158671	-1.63108	0.116999	0.386464	-4.72844
SMID_BREAST_CANCER_RELAPSE_IN_LIVER_DN	-0.230372	-0.00235958	-1.63079	0.117061	0.386464	-4.72885
MA_MYELOID_DIFFERENTIATION_DN	-0.12834	0.00766472	-1.63049	0.117124	0.386464	-4.72927
EPPERT_CE_HSC_LSC	-0.123023	0.0135695	-1.63042	0.117139	0.386464	-4.72937
REACTOME_VITAMIN_D_CALCIFEROL_METABOLISM	-0.197559	-0.00912148	-1.63041	0.117141	0.386464	-4.72938
WANG_ADIPOGENIC_GENES_REPRESSED_BY_SIRT1	0.15773	-0.0181872	1.63041	0.117141	0.386464	-4.72939
REACTOME_PROTEIN_REPAIR	-0.216822	-0.0238159	-1.63011	0.117204	0.386464	-4.7298
REACTOME_SYNAPTIC_ADHESION_LIKE_MOLECULES	0.18253	0.0102807	1.62933	0.117371	0.386781	-4.7309
LOPEZ_MESOTHELIOMA_SURVIVAL_OVERALL_UP	-0.283601	-0.0209179	-1.62866	0.117513	0.386994	-4.73184
KEGG_AUTOIMMUNE_THYROID_DISEASE	-0.175393	-0.0121432	-1.62837	0.117576	0.386994	-4.73226
REACTOME_INSERTION_OF_TAIL_ANCHORED_PROTEINS_INTO_THE_ENDOPLASMIC_RETICULUM_MEMBRANE	-0.159438	0.0237865	-1.62618	0.118043	0.388202	-4.73534
POMEROY_MEDULLOBLASTOMA_DESMOPLASIC_VS_CLASSIC_DN	-0.148552	-0.0166294	-1.62563	0.11816	0.388202	-4.73611
LU_TUMOR_VASCULATURE_DN	0.220989	0.0168514	1.62547	0.118195	0.388202	-4.73634
MEISSNER_BRAIN_HCP_WITH_H3K4ME2_AND_H3K27ME3	0.115603	-0.00646335	1.62533	0.118225	0.388202	-4.73654
TENEDINI_MEGAKARYOCYTE_MARKERS	-0.138121	8.30635e-05	-1.62388	0.118535	0.388709	-4.73857
MARTINEZ_TP53_TARGETS_UP	-0.0715124	0.000196253	-1.62361	0.118592	0.388709	-4.73894
REACTOME_SIGNALING_BY_LIGAND_RESPONSIVE_EGFR_VARIANTS_IN_CANCER	-0.176262	-0.014805	-1.62347	0.118624	0.388709	-4.73915
PID_TELOMERASE_PATHWAY	0.123763	0.00920612	1.62315	0.118693	0.388709	-4.7396
MARTORIATI_MDM4_TARGETS_NEUROEPITHELIUM_DN	-0.108114	-0.00414502	-1.62287	0.118752	0.388709	-4.73999
REACTOME_DNA_DOUBLE_STRAND_BREAK_REPAIR	0.180534	0.00401575	1.62263	0.118804	0.388709	-4.74032
WAESCH_ANAPHASE_PROMOTING_COMPLEX	0.207899	-0.0176463	1.6223	0.118875	0.38871	-4.74079
JECHLINGER_EPITHELIAL_TO_MESENCHYMAL_TRANSITION_DN	-0.168607	0.0204254	-1.6219	0.118961	0.38876	-4.74135
ACEVEDO_METHYLATED_IN_LIVER_CANCER_DN	-0.068204	-0.000912951	-1.62084	0.11919	0.389278	-4.74284
ALCALAY_AML_BY_NPM1_LOCALIZATION_UP	-0.109536	-0.00782269	-1.62043	0.119278	0.389336	-4.74341
REACTOME_CYCLIN_A_B1_B2_ASSOCIATED_EVENTS_DURING_G2_M_TRANSITION	0.24166	0.00246733	1.61991	0.11939	0.389375	-4.74414
WANG_BARRETTS_ESOPHAGUS_DN	-0.157454	0.00591423	-1.61917	0.119549	0.389375	-4.74517
REACTOME_N_GLYCAN_ANTENNAE_ELONGATION	-0.231137	0.0280856	-1.61907	0.119572	0.389375	-4.74532
REACTOME_MITOCHONDRIAL_FATTY_ACID_BETA_OXIDATION_OF_SATURATED_FATTY_ACIDS	0.255518	0.0129694	1.61906	0.119574	0.389375	-4.74533
LEE_BMP2_TARGETS_DN	0.175118	0.00404586	1.61845	0.119705	0.389564	-4.74618
REACTOME_KERATAN_SULFATE_BIOSYNTHESIS	-0.162542	0.00629557	-1.61792	0.119819	0.389564	-4.74692
ABRAHAM_ALPC_VS_MULTIPLE_MYELOMA_DN	0.196927	0.00853459	1.61781	0.119844	0.389564	-4.74708
KANG_AR_TARGETS_DN	-0.161054	-0.0222955	-1.61664	0.120098	0.390159	-4.74872
KAAB_FAILED_HEART_ATRIUM_DN	-0.0862135	0.00563422	-1.61574	0.120292	0.390559	-4.74997
BIOCARTA_BBCELL_PATHWAY	-0.243624	-0.00135504	-1.61533	0.120381	0.390617	-4.75055
REACTOME_FBXL7_DOWN_REGULATES_AURKA_DURING_MITOTIC_ENTRY_AND_IN_EARLY_MITOSIS	0.208093	0.0268508	1.61447	0.120569	0.390945	-4.75176
PID_ECADHERIN_NASCENT_AJ_PATHWAY	0.104117	0.0110457	1.6142	0.120629	0.390945	-4.75214
KEGG_DNA_REPLICATION	0.291051	0.0019178	1.61358	0.120762	0.390945	-4.75299
QI_PLASMACYTOMA_DN	-0.139822	0.00689932	-1.61356	0.120767	0.390945	-4.75302
FERRANDO_TAL1_NEIGHBORS	0.190814	-0.0147296	1.61242	0.121016	0.391451	-4.75462
ROSS_AML_WITH_PML_RARA_FUSION	-0.165432	-0.00363308	-1.61194	0.121122	0.391451	-4.75529
ZHAN_MULTIPLE_MYELOMA_MS_DN	-0.131195	-0.00324486	-1.61187	0.121136	0.391451	-4.75539
MAHADEVAN_GIST_MORPHOLOGICAL_SWITCH	-0.186027	0.0167617	-1.61055	0.121424	0.392151	-4.75723
REACTOME_NUCLEOTIDE_EXCISION_REPAIR	0.17015	0.00912577	1.60994	0.121558	0.392354	-4.75808
REACTOME_KERATAN_SULFATE_DEGRADATION	-0.249239	-0.00933502	-1.60961	0.121631	0.392359	-4.75855
REACTOME_TIE2_SIGNALING	-0.163752	0.0251205	-1.60909	0.121745	0.392456	-4.75927
REACTOME_GLYCOGEN_STORAGE_DISEASES	-0.184938	0.0170247	-1.60875	0.121819	0.392456	-4.75974
BIOCARTA_CTL_PATHWAY	-0.201163	-0.0177141	-1.60849	0.121875	0.392456	-4.7601
SESTO_RESPONSE_TO_UV_C8	-0.106996	0.0103393	-1.60755	0.122084	0.392897	-4.76142
REACTOME_HS_GAG_BIOSYNTHESIS	0.158542	-0.0124075	1.60703	0.122197	0.393033	-4.76214
REACTOME_REGULATION_OF_MRNA_STABILITY_BY_PROTEINS_THAT_BIND_AU_RICH_ELEMENTS	0.191573	0.0197682	1.60566	0.122498	0.39377	-4.76404
YUAN_ZNF143_PARTNERS	0.150634	0.00376587	1.60346	0.122986	0.394879	-4.76711
KEGG_TRYPTOPHAN_METABOLISM	0.157471	-0.0186865	1.60345	0.122987	0.394879	-4.76712
COLLER_MYC_TARGETS_DN	-0.356176	0.00265509	-1.60254	0.123188	0.395114	-4.76838
REACTOME_SIGNALING_BY_NODAL	-0.162754	-0.015873	-1.60192	0.123326	0.395114	-4.76924
FARMER_BREAST_CANCER_CLUSTER_3	0.199568	0.0303916	1.60128	0.123468	0.395114	-4.77013
REACTOME_ASYMMETRIC_LOCALIZATION_OF_PCP_PROTEINS	0.193562	0.0221769	1.60112	0.123503	0.395114	-4.77036
REACTOME_MITOCHONDRIAL_FATTY_ACID_BETA_OXIDATION_OF_UNSATURATED_FATTY_ACIDS	0.316386	0.0259469	1.60096	0.123539	0.395114	-4.77058
REACTOME_SIGNALING_BY_WNT_IN_CANCER	0.160338	0.00151325	1.60086	0.123561	0.395114	-4.77072
BIOCARTA_PTC1_PATHWAY	0.271412	0.0179651	1.60047	0.123648	0.395114	-4.77126
VILIMAS_NOTCH1_TARGETS_UP	-0.125458	0.00666525	-1.59969	0.123822	0.395114	-4.77235
REACTOME_NF_KB_IS_ACTIVATED_AND_SIGNALS_SURVIVAL	-0.231865	0.00685779	-1.59965	0.123831	0.395114	-4.7724
VERRECCHIA_RESPONSE_TO_TGFB1_C5	-0.142369	0.00431327	-1.59909	0.123956	0.395114	-4.77318
REACTOME_METABOLISM_OF_WATER_SOLUBLE_VITAMINS_AND_COFACTORS	0.110144	-0.00742291	1.59884	0.124012	0.395114	-4.77353
REACTOME_ADHERENS_JUNCTIONS_INTERACTIONS	-0.157347	0.0230485	-1.59876	0.124029	0.395114	-4.77364
ROSS_AML_WITH_AML1_ETO_FUSION	-0.119335	0.00652481	-1.59788	0.124225	0.395114	-4.77485
JIANG_CORE_DUPLICON_GENES	0.385758	0.004315	1.59743	0.124326	0.395114	-4.77548
BROWNE_HCMV_INFECTION_18HR_DN	0.100826	0.000997548	1.59709	0.124402	0.395114	-4.77595
LI_WILMS_TUMOR	0.166995	-0.00561069	1.59663	0.124504	0.395114	-4.77659
PIEPOLI_LGI1_TARGETS_DN	0.201741	-0.00107458	1.59631	0.124577	0.395114	-4.77704
ISHIDA_TARGETS_OF_SYT_SSX_FUSIONS	-0.241664	0.0119164	-1.59627	0.124584	0.395114	-4.77708
MARIADASON_RESPONSE_TO_CURCUMIN_SULINDAC_5	0.150577	-0.0244133	1.59622	0.124597	0.395114	-4.77716
REACTOME_CARGO_TRAFFICKING_TO_THE_PERICILIARY_MEMBRANE	0.140905	0.00388955	1.59611	0.124621	0.395114	-4.77731
REACTOME_INNATE_IMMUNE_SYSTEM	-0.0790834	-0.00143185	-1.59595	0.124656	0.395114	-4.77753
RAO_BOUND_BY_SALL4_ISOFORM_A	-0.0759521	-0.0060823	-1.59549	0.12476	0.395114	-4.77817
REACTOME_ACYL_CHAIN_REMODELLING_OF_PG	-0.182275	-0.0161961	-1.59544	0.124771	0.395114	-4.77824
SARTIPY_NORMAL_AT_INSULIN_RESISTANCE_UP	0.194035	0.00642392	1.59517	0.12483	0.395114	-4.77861
REACTOME_PROTEIN_LOCALIZATION	0.118517	0.00264007	1.59506	0.124856	0.395114	-4.77877
KEGG_DORSO_VENTRAL_AXIS_FORMATION	-0.157949	0.0208335	-1.59412	0.125066	0.39555	-4.78006
REACTOME_SIGNALING_BY_FGFR_IN_DISEASE	-0.0952846	0.00320635	-1.59349	0.125208	0.395773	-4.78094
KEGG_JAK_STAT_SIGNALING_PATHWAY	-0.0901554	-0.00101161	-1.59305	0.125307	0.395856	-4.78154
PRAMOONJAGO_SOX4_TARGETS_UP	-0.15622	0.030337	-1.5925	0.125431	0.396021	-4.78231
PASINI_SUZ12_TARGETS_UP	-0.101046	0.00228534	-1.59129	0.125703	0.396653	-4.78398
HOEBEKE_LYMPHOID_STEM_CELL_UP	-0.146971	-0.00218524	-1.59069	0.125838	0.396853	-4.78481
AMIT_EGF_RESPONSE_120_HELA	-0.118923	0.0134541	-1.58962	0.126081	0.397195	-4.78629
GRAHAM_NORMAL_QUIESCENT_VS_NORMAL_DIVIDING_UP	-0.107104	0.00722185	-1.58921	0.126172	0.397195	-4.78685
ZHAN_EARLY_DIFFERENTIATION_GENES_DN	0.138951	-0.000803191	1.58899	0.126222	0.397195	-4.78715
PID_ATR_PATHWAY	0.241671	0.0064236	1.58893	0.126236	0.397195	-4.78724
VALK_AML_CLUSTER_5	-0.184822	0.0124777	-1.58808	0.126429	0.397364	-4.78842
ACEVEDO_NORMAL_TISSUE_ADJACENT_TO_LIVER_TUMOR_UP	-0.0989605	0.000323767	-1.58784	0.126483	0.397364	-4.78875
VALK_AML_CLUSTER_15	0.11915	0.028437	1.58774	0.126506	0.397364	-4.78889
TURJANSKI_MAPK1_AND_MAPK2_TARGETS	-0.149043	0.0251691	-1.58736	0.126591	0.397404	-4.78941
WANG_RESPONSE_TO_GSK3_INHIBITOR_SB216763_DN	0.172242	-0.00833531	1.58649	0.126789	0.397798	-4.79061
SASAI_TARGETS_OF_CXCR6_AND_PTCH1_DN	-0.207893	-0.000993525	-1.58503	0.12712	0.398572	-4.79262
PID_LIS1_PATHWAY	0.146182	-0.0143555	1.58477	0.127181	0.398572	-4.79299
REACTOME_RESPONSE_TO_METAL_IONS	-0.276492	0.00899441	-1.58373	0.127418	0.399043	-4.79442
CHIANG_LIVER_CANCER_SUBCLASS_PROLIFERATION_UP	0.20841	0.00730349	1.58347	0.127476	0.399043	-4.79477
REACTOME_FBXW7_MUTANTS_AND_NOTCH1_IN_CANCER	-0.164089	-0.0256509	-1.58192	0.12783	0.399813	-4.79691
REACTOME_SPHINGOLIPID_DE_NOVO_BIOSYNTHESIS	-0.116178	0.00695123	-1.58149	0.127929	0.399813	-4.7975
GRANDVAUX_IFN_RESPONSE_NOT_VIA_IRF3	0.237712	-0.0444522	1.5814	0.127949	0.399813	-4.79762
REACTOME_SYNTHESIS_OF_PROSTAGLANDINS_PG_AND_THROMBOXANES_TX	0.154748	0.00877857	1.58112	0.128013	0.399813	-4.79801
YAMANAKA_GLIOBLASTOMA_SURVIVAL_DN	0.291633	-0.0338733	1.5771	0.128935	0.402465	-4.80353
REACTOME_REGULATION_OF_TP53_EXPRESSION_AND_DEGRADATION	0.137481	0.0103936	1.57537	0.129335	0.403272	-4.80591
REACTOME_PP2A_MEDIATED_DEPHOSPHORYLATION_OF_KEY_METABOLIC_FACTORS	0.308991	0.00123708	1.57534	0.12934	0.403272	-4.80594
REACTOME_CROSS_PRESENTATION_OF_SOLUBLE_EXOGENOUS_ANTIGENS_ENDOSOMES	0.239138	0.0329261	1.57436	0.129566	0.403518	-4.80728
HOFMANN_MYELODYSPLASTIC_SYNDROM_HIGH_RISK_DN	-0.147093	-0.0374259	-1.57406	0.129637	0.403518	-4.8077
REACTOME_PROPIONYL_COA_CATABOLISM	-0.317882	0.0201087	-1.57405	0.129639	0.403518	-4.80772
REACTOME_NOSTRIN_MEDIATED_ENOS_TRAFFICKING	-0.280011	0.00355705	-1.57368	0.129725	0.403556	-4.80823
REACTOME_RRNA_PROCESSING_IN_THE_NUCLEUS_AND_CYTOSOL	0.184023	0.0146003	1.57264	0.129965	0.404073	-4.80964
REACTOME_SHC1_EVENTS_IN_EGFR_SIGNALING	-0.220267	0.0096281	-1.57211	0.130089	0.404232	-4.81038
JI_CARCINOGENESIS_BY_KRAS_AND_STK11_DN	-0.262127	-0.00409427	-1.5711	0.130322	0.404728	-4.81176
CHIANG_LIVER_CANCER_SUBCLASS_POLYSOMY7_DN	-0.180081	0.0107335	-1.57043	0.130478	0.404983	-4.81267
BIOCARTA_CALCINEURIN_PATHWAY	-0.199041	0.00948414	-1.56868	0.130885	0.406016	-4.81506
GUO_HEX_TARGETS_DN	-0.093461	-0.0132519	-1.56791	0.131065	0.406346	-4.81612
CREIGHTON_ENDOCRINE_THERAPY_RESISTANCE_1	0.0906452	0.0118562	1.56711	0.131252	0.406695	-4.81721
PID_RB_1PATHWAY	0.108953	0.0109592	1.56516	0.131708	0.4078	-4.81987
REACTOME_ACTIVATION_OF_BAD_AND_TRANSLOCATION_TO_MITOCHONDRIA	0.176181	0.0313896	1.56495	0.131757	0.4078	-4.82016
PID_NFKAPPAB_CANONICAL_PATHWAY	-0.164988	0.0248719	-1.5637	0.13205	0.408335	-4.82187
PLASARI_TGFB1_SIGNALING_VIA_NFIC_1HR_UP	-0.154003	-0.0171285	-1.56346	0.132106	0.408335	-4.82219
PID_HIF1A_PATHWAY	0.171492	0.020749	1.56327	0.132152	0.408335	-4.82246
KEGG_HEMATOPOIETIC_CELL_LINEAGE	-0.107403	-0.00580505	-1.56248	0.132337	0.408525	-4.82353
AMIT_SERUM_RESPONSE_40_MCF10A	-0.181215	-0.000978456	-1.56237	0.132362	0.408525	-4.82368
MYLLYKANGAS_AMPLIFICATION_HOT_SPOT_6	-0.233155	-0.00149687	-1.56206	0.132436	0.408525	-4.8241
REACTOME_NOTCH4_ACTIVATION_AND_TRANSMISSION_OF_SIGNAL_TO_THE_NUCLEUS	-0.214155	0.0230331	-1.56055	0.132792	0.409274	-4.82616
BIOCARTA_RARRXR_PATHWAY	-0.224903	-0.049594	-1.5604	0.132828	0.409274	-4.82637
DORSAM_HOXA9_TARGETS_UP	-0.148085	-0.0141167	-1.55994	0.132935	0.409373	-4.82698
NIKOLSKY_BREAST_CANCER_17Q11_Q21_AMPLICON	0.166843	-0.00400575	1.55958	0.13302	0.409407	-4.82748
REACTOME_CDK_MEDIATED_PHOSPHORYLATION_AND_REMOVAL_OF_CDC6	0.20101	0.0254377	1.55892	0.133176	0.409459	-4.82837
ROZANOV_MMP14_TARGETS_UP	-0.101334	-0.00063198	-1.55842	0.133296	0.409459	-4.82906
MIKKELSEN_MEF_HCP_WITH_H3_UNMETHYLATED	-0.0798494	0.00647574	-1.55803	0.133388	0.409459	-4.82959
MCBRYAN_PUBERTAL_BREAST_3_4WK_DN	-0.177762	-0.0211146	-1.5577	0.133464	0.409459	-4.83003
WIERENGA_STAT5A_TARGETS_DN	-0.0955689	-0.0144238	-1.55765	0.133477	0.409459	-4.83011
REACTOME_CELLULAR_RESPONSES_TO_EXTERNAL_STIMULI	0.0910222	0.00539177	1.55762	0.133484	0.409459	-4.83014
DAVICIONI_PAX_FOXO1_SIGNATURE_IN_ARMS_DN	-0.162808	-0.00784028	-1.5568	0.133678	0.40968	-4.83126
BURTON_ADIPOGENESIS_1	-0.162389	-0.0075338	-1.55669	0.133705	0.40968	-4.83141
FRASOR_RESPONSE_TO_SERM_OR_FULVESTRANT_UP	-0.196199	0.00490714	-1.55468	0.134183	0.410917	-4.83414
REACTOME_FORMATION_OF_INCISION_COMPLEX_IN_GG_NER	0.140361	0.0129991	1.55373	0.134408	0.411378	-4.83543
KIM_GLIS2_TARGETS_DN	-0.221991	0.0368908	-1.55319	0.134538	0.411545	-4.83617
BILD_SRC_ONCOGENIC_SIGNATURE	-0.113184	-0.00121547	-1.55241	0.134722	0.411837	-4.83721
WHITFIELD_CELL_CYCLE_G1_S	0.151277	-0.00652275	1.55178	0.134873	0.411837	-4.83807
SANDERSON_PPARA_TARGETS	-0.220004	-0.0408376	-1.55169	0.134895	0.411837	-4.83819
PID_FRA_PATHWAY	-0.131858	0.0128153	-1.55153	0.134933	0.411837	-4.83841
REACTOME_GDP_FUCOSE_BIOSYNTHESIS	0.258668	-0.00938629	1.55086	0.135094	0.412101	-4.83932
GRYDER_PAX3FOXO1_ENHANCERS_KO_DOWN	-0.0660067	0.00982006	-1.54991	0.135321	0.412229	-4.84061
REACTOME_SIGNALING_BY_NOTCH1_HD_DOMAIN_MUTANTS_IN_CANCER	-0.238766	0.0112207	-1.54989	0.135325	0.412229	-4.84063
BIOCARTA_CARM_ER_PATHWAY	0.173513	0.000952283	1.54929	0.135469	0.412229	-4.84145
MOREAUX_MULTIPLE_MYELOMA_BY_TACI_DN	0.180856	0.00918429	1.54925	0.135479	0.412229	-4.8415
CHIN_BREAST_CANCER_COPY_NUMBER_UP	0.196507	0.0208618	1.54893	0.135557	0.412229	-4.84194
BIOCARTA_IGF1MTOR_PATHWAY	0.168385	0.0027018	1.54859	0.135637	0.412229	-4.84239
REACTOME_POST_TRANSLATIONAL_MODIFICATION:_SYNTHESIS_OF_GPI_ANCHORED_PROTEINS	-0.0984633	0.0147817	-1.54821	0.135728	0.412229	-4.8429
LEE_METASTASIS_AND_RNA_PROCESSING_UP	0.229245	0.000204756	1.54818	0.135736	0.412229	-4.84295
MIKKELSEN_MEF_LCP_WITH_H3K4ME3	-0.117679	-0.0169992	-1.54692	0.13604	0.412892	-4.84466
DORSAM_HOXA9_TARGETS_DN	-0.121124	0.00432593	-1.54665	0.136104	0.412892	-4.84502
REACTOME_CELLULAR_RESPONSE_TO_HEAT_STRESS	0.121971	-0.0052806	1.54589	0.136286	0.413215	-4.84604
FLECHNER_BIOPSY_KIDNEY_TRANSPLANT_REJECTED_VS_OK_DN	-0.0785777	-0.00421305	-1.54546	0.136391	0.413305	-4.84663
REACTOME_CTLA4_INHIBITORY_SIGNALING	0.184578	0.00960325	1.54511	0.136476	0.413307	-4.84711
REACTOME_ACTIVATION_OF_NF_KAPPAB_IN_B_CELLS	0.170551	0.0156196	1.54483	0.136542	0.413307	-4.84747
REACTOME_APC_CDC20_MEDIATED_DEGRADATION_OF_NEK2A	0.184956	-0.0185156	1.54316	0.136947	0.414307	-4.84974
PID_LKB1_PATHWAY	0.158106	-0.000924111	1.54243	0.137123	0.414522	-4.85072
NABA_PROTEOGLYCANS	-0.186081	-0.000365034	-1.54224	0.137169	0.414522	-4.85098
NAKAYAMA_SOFT_TISSUE_TUMORS_PCA2_DN	0.164213	0.00647875	1.54064	0.137557	0.415465	-4.85313
REACTOME_COMPETING_ENDOGENOUS_RNAS_CERNAS_REGULATE_PTEN_TRANSLATION	0.298061	0.0188949	1.53916	0.137916	0.416323	-4.85512
REACTOME_CATION_COUPLED_CHLORIDE_COTRANSPORTERS	-0.252729	0.0374109	-1.53882	0.137999	0.416344	-4.85558
HOFMANN_CELL_LYMPHOMA_DN	0.104689	6.46468e-05	1.5343	0.139103	0.419445	-4.86166
HEDENFALK_BREAST_CANCER_BRACX_UP	-0.18346	0.0370917	-1.53361	0.139273	0.419676	-4.86259
GOUYER_TUMOR_INVASIVENESS	-0.218515	0.00178543	-1.53337	0.139332	0.419676	-4.86292
PROVENZANI_METASTASIS_DN	-0.0999077	0.00219354	-1.53275	0.139484	0.419902	-4.86374
OSAWA_TNF_TARGETS	-0.190533	0.0502723	-1.53198	0.139673	0.420241	-4.86478
WHITEHURST_PACLITAXEL_SENSITIVITY	0.135161	0.00694157	1.53145	0.139805	0.420408	-4.8655
ZHANG_RESPONSE_TO_CANTHARIDIN_UP	-0.155477	0.00321069	-1.53058	0.140018	0.42059	-4.86666
SA_PROGRAMMED_CELL_DEATH	0.161108	-0.0091529	1.53058	0.140018	0.42059	-4.86666
BIOCARTA_S1P_PATHWAY	-0.254816	-0.0375001	-1.53003	0.140155	0.42077	-4.8674
IWANAGA_CARCINOGENESIS_BY_KRAS_DN	-0.0886666	-0.000197245	-1.52883	0.14045	0.421248	-4.869
GAUSSMANN_MLL_AF4_FUSION_TARGETS_B_UP	-0.110274	-0.0183843	-1.52876	0.140467	0.421248	-4.8691
FINETTI_BREAST_CANCER_KINOME_GREEN	-0.133044	-0.00729341	-1.52739	0.140805	0.42188	-4.87092
SUNG_METASTASIS_STROMA_UP	-0.107793	0.0138805	-1.52729	0.140831	0.42188	-4.87107
SMID_BREAST_CANCER_NORMAL_LIKE_DN	-0.243383	-0.0351826	-1.52676	0.140962	0.421883	-4.87177
PID_BARD1_PATHWAY	0.257935	0.0256856	1.52666	0.140986	0.421883	-4.8719
GINESTIER_BREAST_CANCER_ZNF217_AMPLIFIED_UP	-0.118074	-0.00611035	-1.52633	0.141068	0.4219	-4.87235
PID_NCADHERIN_PATHWAY	0.165383	0.00249466	1.5246	0.141497	0.422553	-4.87466
MORI_SMALL_PRE_BII_LYMPHOCYTE_UP	-0.115177	-0.0023093	-1.52448	0.141528	0.422553	-4.87482
SMID_BREAST_CANCER_NORMAL_LIKE_UP	-0.104072	-0.0113943	-1.52327	0.14183	0.422553	-4.87644
REACTOME_MISCELLANEOUS_TRANSPORT_AND_BINDING_EVENTS	-0.173702	-0.0129693	-1.52312	0.141865	0.422553	-4.87664
MISHRA_CARCINOMA_ASSOCIATED_FIBROBLAST_DN	-0.202799	-0.0062521	-1.52293	0.141912	0.422553	-4.87689
REACTOME_UNBLOCKING_OF_NMDA_RECEPTORS_GLUTAMATE_BINDING_AND_ACTIVATION	0.148756	0.00845414	1.52282	0.141942	0.422553	-4.87704
KEGG_GLYCOLYSIS_GLUCONEOGENESIS	0.112147	0.00088269	1.52275	0.141958	0.422553	-4.87713
REACTOME_ACTIVATED_NTRK2_SIGNALS_THROUGH_PI3K	-0.29012	-0.019626	-1.52273	0.141963	0.422553	-4.87716
SAMOLS_TARGETS_OF_KHSV_MIRNAS_UP	-0.240868	0.0248223	-1.5225	0.142021	0.422553	-4.87747
HUMMERICH_MALIGNANT_SKIN_TUMOR_UP	-0.148239	-0.0121688	-1.52236	0.142055	0.422553	-4.87765
MIKHAYLOVA_OXIDATIVE_STRESS_RESPONSE_VIA_VHL_UP	0.225252	-0.00120502	1.52135	0.142308	0.422848	-4.87901
NIKOLSKY_BREAST_CANCER_1Q21_AMPLICON	0.182847	-0.00408677	1.52106	0.142381	0.422848	-4.87939
BILANGES_RAPAMYCIN_SENSITIVE_GENES	0.124859	0.00543694	1.5209	0.14242	0.422848	-4.8796
REACTOME_PHOSPHORYLATION_OF_CD3_AND_TCR_ZETA_CHAINS	-0.233817	-0.00714758	-1.52015	0.142608	0.422848	-4.88061
BIOCARTA_EXTRINSIC_PATHWAY	-0.197918	0.000234858	-1.52	0.142645	0.422848	-4.8808
REACTOME_SHC1_EVENTS_IN_ERBB4_SIGNALING	-0.162343	0.00951036	-1.51991	0.142668	0.422848	-4.88092
BIOCARTA_INFLAM_PATHWAY	-0.15925	-0.0197908	-1.51981	0.142692	0.422848	-4.88105
OZANNE_AP1_TARGETS_DN	-0.252111	-0.00623566	-1.5193	0.14282	0.423	-4.88174
MCBRYAN_PUBERTAL_BREAST_5_6WK_UP	-0.0886243	0.00929217	-1.51829	0.143074	0.423271	-4.88309
REACTOME_CREB1_PHOSPHORYLATION_THROUGH_THE_ACTIVATION_OF_CAMKII_CAMKK_CAMKIV_CASCASDE	0.215439	-0.00709136	1.51783	0.143188	0.423271	-4.88369
REACTOME_ABC_TRANSPORTER_DISORDERS	0.150525	0.0133295	1.51781	0.143194	0.423271	-4.88372
PID_E2F_PATHWAY	0.163942	1.3752e-05	1.51771	0.14322	0.423271	-4.88386
NUTT_GBM_VS_AO_GLIOMA_UP	-0.1179	-0.0164628	-1.51631	0.143569	0.424077	-4.88571
ACEVEDO_LIVER_CANCER_UP	-0.0788614	-0.0052817	-1.51511	0.143874	0.424748	-4.88732
ZHOU_PANCREATIC_EXOCRINE_PROGENITOR	0.207248	-0.0208467	1.51373	0.14422	0.425419	-4.88915
REACTOME_SIGNALING_BY_WNT	0.0760818	0.00623925	1.51359	0.144256	0.425419	-4.88934
PID_AR_NONGENOMIC_PATHWAY	0.128084	0.0112622	1.51307	0.144387	0.425577	-4.89002
REACTOME_PLASMA_LIPOPROTEIN_CLEARANCE	-0.138896	-0.00941729	-1.512	0.144657	0.426146	-4.89144
IWANAGA_CARCINOGENESIS_BY_KRAS_PTEN_DN	-0.0808526	-0.00400652	-1.51146	0.144794	0.42632	-4.89216
IKEDA_MIR30_TARGETS_DN	-0.203322	-0.00745304	-1.51115	0.144873	0.426324	-4.89257
KOMMAGANI_TP63_GAMMA_TARGETS	-0.140735	0.00232697	-1.51003	0.145157	0.426831	-4.89406
CHIARADONNA_NEOPLASTIC_TRANSFORMATION_KRAS_UP	0.151938	0.00424465	1.50979	0.145219	0.426831	-4.89439
KIM_MYCL1_AMPLIFICATION_TARGETS_UP	0.239845	-0.0172136	1.50956	0.145278	0.426831	-4.89469
REACTOME_ZINC_TRANSPORTERS	-0.168426	-0.000526788	-1.5089	0.145445	0.427045	-4.89557
SHIRAISHI_PLZF_TARGETS_UP	0.212755	0.0106901	1.50856	0.14553	0.427045	-4.89601
SCHLOSSER_MYC_TARGETS_AND_SERUM_RESPONSE_UP	0.183441	0.00959711	1.50835	0.145584	0.427045	-4.89629
NAKAMURA_TUMOR_ZONE_PERIPHERAL_VS_CENTRAL_DN	-0.122293	-0.0044698	-1.50781	0.145721	0.427152	-4.897
BIOCARTA_ACTINY_PATHWAY	-0.17089	0.00305929	-1.5076	0.145775	0.427152	-4.89729
CHEN_HOXA5_TARGETS_9HR_DN	0.145737	0.000944422	1.50678	0.145985	0.427333	-4.89837
REACTOME_LAGGING_STRAND_SYNTHESIS	0.308719	-0.00384253	1.50675	0.145993	0.427333	-4.89841
CAFFAREL_RESPONSE_TO_THC_DN	0.239244	-0.00660368	1.50627	0.146114	0.427462	-4.89905
BERENJENO_TRANSFORMED_BY_RHOA_FOREVER_UP	-0.158009	-0.0211496	-1.50583	0.146226	0.427551	-4.89963
FARMER_BREAST_CANCER_CLUSTER_1	0.134745	-0.0101684	1.50554	0.1463	0.427551	-4.90001
BRUINS_UVC_RESPONSE_VIA_TP53_GROUP_C	0.0940959	-0.00204203	1.50514	0.146403	0.427625	-4.90054
WEI_MYCN_TARGETS_WITH_E_BOX	0.168031	0.00588063	1.50274	0.147017	0.429076	-4.90371
HAN_JNK_SINGALING_UP	-0.111797	0.0265327	-1.50259	0.147056	0.429076	-4.90392
MAYBURD_RESPONSE_TO_L663536_DN	0.197173	0.00618404	1.50193	0.147224	0.429339	-4.90478
XU_GH1_EXOGENOUS_TARGETS_DN	-0.0895211	0.00961546	-1.5014	0.14736	0.429507	-4.90548
SA_CASPASE_CASCADE	-0.141224	-0.00607815	-1.50054	0.147581	0.429924	-4.90661
BIOCARTA_PPARG_PATHWAY	0.28044	-0.0680824	1.49978	0.147778	0.430269	-4.90762
BILANGES_RAPAMYCIN_SENSITIVE_VIA_TSC1_AND_TSC2	0.173368	0.00303216	1.49919	0.14793	0.430298	-4.9084
MIKKELSEN_NPC_HCP_WITH_H3K27ME3	0.0783327	0.00632987	1.49913	0.147946	0.430298	-4.90848
ELVIDGE_HYPOXIA_DN	0.141887	-0.00744601	1.49883	0.148023	0.430298	-4.90887
LIU_IL13_MEMORY_MODEL_UP	0.168356	-0.000242385	1.49809	0.148213	0.430353	-4.90985
KEGG_CELL_ADHESION_MOLECULES_CAMS	-0.0968531	-0.00640636	-1.4974	0.148391	0.430353	-4.91076
SHAFFER_IRF4_TARGETS_IN_MYELOMA_VS_MATURE_B_LYMPHOCYTE	-0.118116	-0.000252676	-1.49706	0.148479	0.430353	-4.9112
REACTOME_AUF1_HNRNP_D0_BINDS_AND_DESTABILIZES_MRNA	0.21862	0.0268554	1.49696	0.148507	0.430353	-4.91135
AUJLA_IL22_AND_IL17A_SIGNALING	0.211363	-0.0233772	1.49673	0.148565	0.430353	-4.91164
WALLACE_PROSTATE_CANCER_UP	0.139895	0.00506623	1.4967	0.148573	0.430353	-4.91168
VALK_AML_CLUSTER_9	-0.160548	-0.00772988	-1.49631	0.148675	0.430353	-4.9122
BASAKI_YBX1_TARGETS_DN	-0.0929962	-0.00141921	-1.4962	0.148702	0.430353	-4.91234
REACTOME_SIGNALING_BY_FGFR2_IN_DISEASE	-0.10573	0.0201892	-1.49581	0.148802	0.430353	-4.91285
REACTOME_FICOLINS_BIND_TO_REPETITIVE_CARBOHYDRATE_STRUCTURES_ON_THE_TARGET_CELL_SURFACE	-0.207556	0.0259462	-1.49573	0.148824	0.430353	-4.91296
LI_WILMS_TUMOR_VS_FETAL_KIDNEY_2_UP	0.186654	0.0128865	1.49494	0.14903	0.430474	-4.914
ROSS_AML_OF_FAB_M7_TYPE	-0.088794	0.00800424	-1.49471	0.149089	0.430474	-4.91431
RIZ_ERYTHROID_DIFFERENTIATION_HBZ	0.142206	-0.0112153	1.49466	0.1491	0.430474	-4.91436
REACTOME_GENERATION_OF_SECOND_MESSENGER_MOLECULES	-0.160089	-0.0182491	-1.4934	0.149428	0.431193	-4.91602
PETRETTO_LEFT_VENTRICLE_MASS_QTL_CIS_DN	0.201441	-0.00219793	1.49284	0.149574	0.431387	-4.91676
WIERENGA_STAT5A_TARGETS_UP	-0.0884946	0.00592326	-1.49253	0.149654	0.431394	-4.91717
ZAIDI_OSTEOBLAST_TRANSCRIPTION_FACTORS	0.194741	-0.0238811	1.49168	0.149876	0.431613	-4.91828
BIOCARTA_RNAPOL3_PATHWAY	0.211606	0.0225514	1.49164	0.149888	0.431613	-4.91834
BROWNE_HCMV_INFECTION_12HR_UP	-0.109528	-0.00116625	-1.49071	0.150128	0.432079	-4.91955
FIGUEROA_AML_METHYLATION_CLUSTER_2_UP	0.0959568	0.0139913	1.49013	0.150279	0.432199	-4.92031
FUJIWARA_PARK2_IN_LIVER_CANCER_UP	-0.210404	0.016725	-1.48995	0.150327	0.432199	-4.92055
REACTOME_REGULATION_OF_MECP2_EXPRESSION_AND_ACTIVITY	0.128639	0.00667977	1.48935	0.150483	0.432336	-4.92134
PETROVA_PROX1_TARGETS_DN	-0.128518	0.0130796	-1.48917	0.150531	0.432336	-4.92158
IIZUKA_LIVER_CANCER_PROGRESSION_G2_G3_DN	-0.188077	-0.0543317	-1.48781	0.150887	0.433131	-4.92336
SCHLOSSER_SERUM_RESPONSE_DN	-0.10278	-0.0063241	-1.48644	0.151247	0.433628	-4.92516
BROWNE_HCMV_INFECTION_2HR_UP	-0.176276	-0.0213205	-1.48594	0.151377	0.433628	-4.92581
BILANGES_SERUM_RESPONSE_TRANSLATION	0.181862	0.00323526	1.48591	0.151386	0.433628	-4.92585
MILI_PSEUDOPODIA	0.122176	0.0218204	1.48557	0.151476	0.433628	-4.9263
VANHARANTA_UTERINE_FIBROID_DN	-0.115675	-0.00693718	-1.48537	0.151528	0.433628	-4.92656
YAMASHITA_LIVER_CANCER_STEM_CELL_DN	0.0960147	-0.0128916	1.48505	0.15161	0.433628	-4.92697
SU_TESTIS	0.139001	0.00267658	1.48482	0.151671	0.433628	-4.92727
OUELLET_CULTURED_OVARIAN_CANCER_INVASIVE_VS_LMP_UP	-0.141927	0.00978803	-1.48475	0.151691	0.433628	-4.92737
PLASARI_NFIC_TARGETS_BASAL_UP	-0.166016	-0.00284792	-1.48404	0.151877	0.433935	-4.9283
BAKER_HEMATOPOESIS_STAT5_TARGETS	-0.239797	0.0164191	-1.48354	0.152009	0.434087	-4.92896
APPIERTO_RESPONSE_TO_FENRETINIDE_DN	0.109242	-0.00239832	1.48295	0.152164	0.434121	-4.92972
REACTOME_RRNA_PROCESSING	0.172203	0.0138068	1.48289	0.152179	0.434121	-4.9298
MULLIGHAN_NPM1_SIGNATURE_3_UP	-0.0787764	0.00160774	-1.48158	0.152527	0.434887	-4.93152
PASQUALUCCI_LYMPHOMA_BY_GC_STAGE_DN	-0.0900004	0.00266914	-1.48103	0.15267	0.434951	-4.93223
FINETTI_BREAST_CANCERS_KINOME_BLUE	0.14528	-0.00587812	1.48089	0.152707	0.434951	-4.93241
REACTOME_TLR3_MEDIATED_TICAM1_DEPENDENT_PROGRAMMED_CELL_DEATH	0.265078	-0.0100716	1.47789	0.153504	0.436872	-4.93633
NUMATA_CSF3_SIGNALING_VIA_STAT3	-0.150699	0.0228276	-1.47746	0.153617	0.436872	-4.93688
TURASHVILI_BREAST_CARCINOMA_DUCTAL_VS_LOBULAR_UP	0.141488	-0.00103765	1.47745	0.15362	0.436872	-4.9369
ZEILSTRA_CD44_TARGETS_UP	0.210203	0.0127311	1.47693	0.153759	0.43704	-4.93758
FRIDMAN_SENESCENCE_DN	-0.195627	-0.00539198	-1.47634	0.153915	0.43726	-4.93835
ONO_FOXP3_TARGETS_UP	-0.153837	-0.00190341	-1.47538	0.154172	0.437761	-4.9396
MARTINEZ_RESPONSE_TO_TRABECTEDIN_UP	-0.131176	-0.00533272	-1.47461	0.154378	0.43812	-4.94061
REACTOME_TRANSPORT_OF_VITAMINS_NUCLEOSIDES_AND_RELATED_MOLECULES	-0.11381	-0.00888089	-1.47357	0.154655	0.43868	-4.94195
BASSO_HAIRY_CELL_LEUKEMIA_DN	-0.248726	0.0167206	-1.47298	0.154813	0.438904	-4.94273
JISON_SICKLE_CELL_DISEASE_UP	-0.110245	-0.00235437	-1.47184	0.155117	0.439395	-4.9442
CHEOK_RESPONSE_TO_MERCAPTOPURINE_DN	0.120698	-0.00307569	1.47173	0.155148	0.439395	-4.94435
OLSSON_E2F3_TARGETS_DN	0.193946	-0.00666668	1.47143	0.155228	0.439395	-4.94474
KEGG_PROTEIN_EXPORT	-0.157579	0.0065811	-1.47114	0.155306	0.439395	-4.94512
BIOCARTA_TGFB_PATHWAY	-0.143103	-0.00876325	-1.47036	0.155515	0.439721	-4.94613
XU_RESPONSE_TO_TRETINOIN_UP	-0.170303	-0.0312028	-1.47	0.155611	0.439721	-4.9466
RANKIN_ANGIOGENIC_TARGETS_OF_VHL_HIF2A_UP	-0.31197	0.00518233	-1.46981	0.155661	0.439721	-4.94684
ZHAN_VARIABLE_EARLY_DIFFERENTIATION_GENES_DN	0.16433	-0.0131856	1.46922	0.155821	0.439947	-4.94761
IRITANI_MAD1_TARGETS_UP	-0.189253	-0.00652076	-1.46805	0.156135	0.440608	-4.94912
GAJATE_RESPONSE_TO_TRABECTEDIN_UP	-0.151144	-0.0140148	-1.4676	0.156257	0.440726	-4.94971
ELLWOOD_MYC_TARGETS_DN	-0.152248	-0.00795792	-1.46618	0.15664	0.44158	-4.95155
HOLLEMAN_PREDNISOLONE_RESISTANCE_B_ALL_UP	0.16871	-0.00709756	1.46586	0.156726	0.441596	-4.95196
KEGG_ARRHYTHMOGENIC_RIGHT_VENTRICULAR_CARDIOMYOPATHY_ARVC	-0.116019	0.00794887	-1.46458	0.157072	0.442343	-4.95362
LUI_THYROID_CANCER_CLUSTER_5	-0.193313	-0.0171206	-1.46315	0.15746	0.44321	-4.95547
BHATI_G2M_ARREST_BY_2METHOXYESTRADIOL_UP	0.156479	0.000168194	1.46193	0.157791	0.4439	-4.95705
REACTOME_REGULATION_OF_RAS_BY_GAPS	0.18074	0.0182729	1.46104	0.158034	0.4439	-4.9582
REACTOME_ASSEMBLY_OF_THE_HIV_VIRION	-0.189797	-0.0355166	-1.46087	0.158078	0.4439	-4.95841
CHARAFE_BREAST_CANCER_BASAL_VS_MESENCHYMAL_DN	-0.129744	0.0151969	-1.46084	0.158086	0.4439	-4.95845
JOHNSTONE_PARVB_TARGETS_3_UP	-0.104546	0.00781526	-1.46071	0.158122	0.4439	-4.95862
INGRAM_SHH_TARGETS_UP	-0.0915816	-0.00330744	-1.46046	0.15819	0.4439	-4.95894
REACTOME_ERBB2_REGULATES_CELL_MOTILITY	0.165381	0.00706866	1.45998	0.158322	0.444045	-4.95957
DAIRKEE_CANCER_PRONE_RESPONSE_BPA	0.138235	0.010359	1.45917	0.158541	0.444433	-4.96061
LEE_LIVER_CANCER_HEPATOBLAST	0.178001	0.0201703	1.45765	0.158956	0.445332	-4.96256
REACTOME_INTEGRATION_OF_PROVIRUS	0.194836	0.00966481	1.45706	0.159117	0.445332	-4.96333
MARIADASON_RESPONSE_TO_BUTYRATE_CURCUMIN_SULINDAC_TSA_1	-0.164827	0.0132874	-1.45675	0.159203	0.445332	-4.96373
REACTOME_PROLACTIN_RECEPTOR_SIGNALING	0.134969	-0.0149604	1.45656	0.159256	0.445332	-4.96398
FLORIO_NEOCORTEX_BASAL_RADIAL_GLIA_UP	-0.0695554	0.00221643	-1.45538	0.159578	0.445332	-4.96549
REACTOME_ACETYLCHOLINE_REGULATES_INSULIN_SECRETION	-0.204496	0.0263044	-1.45536	0.159585	0.445332	-4.96552
REACTOME_REGULATION_OF_APOPTOSIS	0.206229	0.027491	1.45525	0.159615	0.445332	-4.96567
CARD_MIR302A_TARGETS	-0.125105	-0.000993816	-1.45512	0.159648	0.445332	-4.96582
KEGG_VASOPRESSIN_REGULATED_WATER_REABSORPTION	-0.155505	-0.0100402	-1.45489	0.159712	0.445332	-4.96612
REACTOME_PYRUVATE_METABOLISM_AND_CITRIC_ACID_TCA_CYCLE	0.152853	0.00930652	1.45473	0.159757	0.445332	-4.96633
KEGG_NUCLEOTIDE_EXCISION_REPAIR	0.172052	0.0137426	1.45394	0.159974	0.445332	-4.96735
REACTOME_TRANSCRIPTIONAL_REGULATION_BY_TP53	0.098479	0.00388567	1.45363	0.160058	0.445332	-4.96775
GRADE_COLON_AND_RECTAL_CANCER_UP	0.15157	0.0181757	1.45363	0.16006	0.445332	-4.96775
REACTOME_HSF1_ACTIVATION	-0.146737	-0.0106886	-1.45345	0.160107	0.445332	-4.96797
PID_IL2_STAT5_PATHWAY	-0.155772	-0.00333333	-1.45316	0.160189	0.445332	-4.96836
MCCLUNG_CREB1_TARGETS_UP	-0.0918399	-0.00403543	-1.45305	0.160218	0.445332	-4.96849
FOURNIER_ACINAR_DEVELOPMENT_EARLY_DN	-0.214772	-0.0359312	-1.45298	0.160239	0.445332	-4.96859
WELCH_GATA1_TARGETS	0.16207	0.0210351	1.45117	0.160737	0.446492	-4.97091
STEIN_ESRRA_TARGETS_RESPONSIVE_TO_ESTROGEN_DN	0.21795	-0.00836056	1.45017	0.161012	0.447029	-4.97219
REACTOME_REGULATION_OF_RUNX3_EXPRESSION_AND_ACTIVITY	0.19193	0.0186362	1.4496	0.161168	0.447098	-4.97292
REACTOME_RETROGRADE_TRANSPORT_AT_THE_TRANS_GOLGI_NETWORK	-0.16943	0.00705671	-1.44949	0.161199	0.447098	-4.97306
CHEMNITZ_RESPONSE_TO_PROSTAGLANDIN_E2_DN	-0.0918754	-0.000990019	-1.44909	0.16131	0.447181	-4.97358
KIM_LIVER_CANCER_POOR_SURVIVAL_DN	-0.135256	0.0154095	-1.44864	0.161434	0.447298	-4.97415
BURTON_ADIPOGENESIS_7	0.110704	-0.00785007	1.44692	0.161911	0.448395	-4.97636
LOPES_METHYLATED_IN_COLON_CANCER_UP	0.150023	-0.0206204	1.44572	0.162244	0.449091	-4.9779
BIOCARTA_NGF_PATHWAY	-0.156481	-0.0144129	-1.44448	0.16259	0.44982	-4.97949
REACTOME_DOWNSTREAM_SIGNALING_OF_ACTIVATED_FGFR3	-0.1465	0.012832	-1.444	0.162722	0.449959	-4.9801
WEINMANN_ADAPTATION_TO_HYPOXIA_UP	-0.146769	-0.0164017	-1.44336	0.1629	0.450098	-4.98092
PID_RAC1_PATHWAY	0.101601	0.0177166	1.44304	0.16299	0.450098	-4.98133
KEGG_PROTEASOME	0.239636	0.0282556	1.44262	0.163108	0.450098	-4.98187
IKEDA_MIR1_TARGETS_UP	-0.119301	-0.00580302	-1.4422	0.163225	0.450098	-4.9824
MARIADASON_REGULATED_BY_HISTONE_ACETYLATION_DN	0.117482	-0.00754291	1.44208	0.163258	0.450098	-4.98256
BOYAULT_LIVER_CANCER_SUBCLASS_G23_UP	0.20388	-0.00329098	1.44206	0.163263	0.450098	-4.98258
REACTOME_INTERCONVERSION_OF_NUCLEOTIDE_DI_AND_TRIPHOSPHATES	0.210289	0.00529657	1.44056	0.163684	0.451033	-4.9845
REACTOME_SIGNALING_BY_NON_RECEPTOR_TYROSINE_KINASES	0.103464	-0.00747997	1.44017	0.163792	0.451106	-4.985
BIOCARTA_PELP1_PATHWAY	0.224963	0.0147776	1.43885	0.164163	0.4519	-4.98669
REACTOME_MTOR_SIGNALLING	0.15877	-0.0170363	1.43823	0.164336	0.45215	-4.98747
[truncated: 3,501 more rows]

## Sheet: HS27AvsMSC
C2	logFC	AveExpr	t	P.Value	adj.P.Val	B
BASSO_CD40_SIGNALING_UP	-0.534434	0.0151903	-7.53206	1.50482e-07	0.00054396	7.48618
GALINDO_IMMUNE_RESPONSE_TO_ENTEROTOXIN	-0.517137	0.017678	-7.40537	1.97804e-07	0.00054396	7.23368
ALTEMEIER_RESPONSE_TO_LPS_WITH_MECHANICAL_VENTILATION	-0.564567	0.0250326	-7.0947	3.90247e-07	0.000556808	6.60414
VERHAAK_AML_WITH_NPM1_MUTATED_UP	-0.453773	0.00509737	-7.07796	4.04951e-07	0.000556808	6.56979
TONKS_TARGETS_OF_RUNX1_RUNX1T1_FUSION_ERYTHROCYTE_UP	-0.446262	0.00097434	-6.67691	9.92791e-07	0.00109207	5.73468
REACTOME_MRNA_DECAY_BY_5_TO_3_EXORIBONUCLEASE	0.650339	-0.0303938	6.41546	1.80106e-06	0.00116993	5.17774
IIZUKA_LIVER_CANCER_EARLY_RECURRENCE	-0.678845	-0.00082325	-6.37846	1.9608e-06	0.00116993	5.09815
RUTELLA_RESPONSE_TO_CSF2RB_AND_IL4_DN	-0.372818	0.0125777	-6.34422	2.12152e-06	0.00116993	5.02434
REACTOME_TFAP2_AP_2_FAMILY_REGULATES_TRANSCRIPTION_OF_CELL_CYCLE_FACTORS	-0.93484	0.0912989	-6.31517	2.26837e-06	0.00116993	4.9616
BIOCARTA_NKT_PATHWAY	-0.516751	-0.0124223	-6.30714	2.31082e-06	0.00116993	4.94422
MURATA_VIRULENCE_OF_H_PILORI	-0.638354	0.0337843	-6.24856	2.64574e-06	0.00116993	4.81729
REACTOME_FCGAMMA_RECEPTOR_FCGR_DEPENDENT_PHAGOCYTOSIS	-0.439377	0.0127417	-6.22653	2.7842e-06	0.00116993	4.76944
FULCHER_INFLAMMATORY_RESPONSE_LECTIN_VS_LPS_DN	-0.405783	0.00341791	-6.19306	3.00892e-06	0.00116993	4.6966
DORN_ADENOVIRUS_INFECTION_48HR_UP	-0.697729	0.0457752	-6.16237	3.2312e-06	0.00116993	4.62969
REACTOME_SIGNALING_BY_VEGF	-0.448149	0.025788	-6.13974	3.40584e-06	0.00116993	4.58027
REACTOME_NCAM1_INTERACTIONS	-0.494514	0.00482595	-6.13434	3.44888e-06	0.00116993	4.56847
BOSCO_TH1_CYTOTOXIC_MODULE	-0.440332	0.00158671	-6.10631	3.68156e-06	0.00116993	4.50715
MARKEY_RB1_ACUTE_LOF_DN	-0.450692	0.0115694	-6.06025	4.09932e-06	0.00116993	4.40617
WIERENGA_STAT5A_TARGETS_GROUP2	-0.472814	0.000687748	-6.05884	4.11284e-06	0.00116993	4.40307
PID_NFAT_3PATHWAY	-0.485526	0.0338329	-6.02906	4.40936e-06	0.00116993	4.33764
CROONQUIST_NRAS_VS_STROMAL_STIMULATION_UP	-0.564531	0.000583025	-6.02351	4.46701e-06	0.00116993	4.32543
REACTOME_ANTIGEN_ACTIVATES_B_CELL_RECEPTOR_BCR_LEADING_TO_GENERATION_OF_SECOND_MESSENGERS	-0.540401	-0.00305596	-5.97122	5.0492e-06	0.00121735	4.21024
LIAN_LIPA_TARGETS_6M	-0.568975	0.0115991	-5.94446	5.37648e-06	0.00121735	4.15117
DUNNE_TARGETS_OF_AML1_MTG8_FUSION_UP	-0.444724	-0.00719657	-5.93331	5.51921e-06	0.00121735	4.12652
BOYLAN_MULTIPLE_MYELOMA_C_D_DN	-0.342248	0.000345623	-5.93222	5.5334e-06	0.00121735	4.12411
RASHI_RESPONSE_TO_IONIZING_RADIATION_2	-0.413483	0.0064392	-5.84025	6.87166e-06	0.0014356	3.92026
HUMMERICH_MALIGNANT_SKIN_TUMOR_UP	-0.653051	-0.0121688	-5.82954	7.04747e-06	0.0014356	3.89648
TARTE_PLASMA_CELL_VS_B_LYMPHOCYTE_DN	-0.426936	0.0166104	-5.80917	7.39484e-06	0.00145256	3.85117
SANA_TNF_SIGNALING_UP	-0.530492	0.0280442	-5.77384	8.03934e-06	0.00150102	3.77248
SMIRNOV_CIRCULATING_ENDOTHELIOCYTES_IN_CANCER_UP	-0.425243	-0.00269673	-5.76052	8.29695e-06	0.00150102	3.74277
LU_TUMOR_ANGIOGENESIS_UP	-0.485767	0.0124089	-5.71332	9.27912e-06	0.00150102	3.63736
MCDOWELL_ACUTE_LUNG_INJURY_UP	-0.479304	0.0204731	-5.71039	9.344e-06	0.00150102	3.6308
REACTOME_CLEC7A_DECTIN_1_INDUCES_NFAT_ACTIVATION	-0.603346	0.031793	-5.70566	9.44954e-06	0.00150102	3.62021
HAHTOLA_MYCOSIS_FUNGOIDES_CD4_UP	-0.471086	0.02007	-5.69141	9.77464e-06	0.00150102	3.58834
ZHANG_RESPONSE_TO_IKK_INHIBITOR_AND_TNF_UP	-0.497835	0.0211773	-5.68965	9.81554e-06	0.00150102	3.5844
MAINA_VHL_TARGETS_DN	-0.642177	0.0685639	-5.68925	9.82488e-06	0.00150102	3.5835
RAY_ALZHEIMERS_DISEASE	-0.624149	0.0334816	-5.62346	1.14894e-05	0.00158341	3.43598
RUTELLA_RESPONSE_TO_HGF_VS_CSF2RB_AND_IL4_DN	-0.341232	0.0162518	-5.61707	1.16653e-05	0.00158341	3.42165
LENAOUR_DENDRITIC_CELL_MATURATION_DN	-0.398908	-0.00145159	-5.61554	1.17081e-05	0.00158341	3.4182
DIRMEIER_LMP1_RESPONSE_EARLY	-0.488925	0.0145279	-5.61274	1.17864e-05	0.00158341	3.41191
BOYLAN_MULTIPLE_MYELOMA_C_CLUSTER_DN	-0.510004	0.00902615	-5.61213	1.18036e-05	0.00158341	3.41054
RUTELLA_RESPONSE_TO_HGF_DN	-0.37473	0.00878657	-5.53574	1.41641e-05	0.00182969	3.2386
KEGG_CHEMOKINE_SIGNALING_PATHWAY	-0.338449	-0.00369549	-5.5316	1.43048e-05	0.00182969	3.22928
REACTOME_NCAM_SIGNALING_FOR_NEURITE_OUT_GROWTH	-0.402425	0.00854304	-5.50792	1.51383e-05	0.00189229	3.17585
PAPASPYRIDONOS_UNSTABLE_ATEROSCLEROTIC_PLAQUE_UP	-0.582161	0.028148	-5.49441	1.56358e-05	0.00191104	3.14534
PRAMOONJAGO_SOX4_TARGETS_UP	-0.617056	0.030337	-5.46764	1.66714e-05	0.00199332	3.08483
LEE_LIVER_CANCER_E2F1_UP	-0.435685	-0.0144731	-5.4047	1.93883e-05	0.00225149	2.94234
PID_RAC1_PATHWAY	-0.435897	0.0177166	-5.38142	2.05035e-05	0.00225149	2.88955
REACTOME_PLATELET_ADHESION_TO_EXPOSED_COLLAGEN	-0.535209	-0.014541	-5.38052	2.05482e-05	0.00225149	2.8875
PID_WNT_CANONICAL_PATHWAY	-0.454818	-0.002378	-5.36721	2.12164e-05	0.00225149	2.85729
PID_IL12_2PATHWAY	-0.479868	0.021761	-5.34368	2.2452e-05	0.00225149	2.80384
DORN_ADENOVIRUS_INFECTION_32HR_UP	-0.665966	0.0314621	-5.34196	2.25453e-05	0.00225149	2.79993
WIERENGA_STAT5A_TARGETS_UP	-0.36436	0.00592326	-5.3416	2.25649e-05	0.00225149	2.79911
KEGG_B_CELL_RECEPTOR_SIGNALING_PATHWAY	-0.418825	0.0122259	-5.34068	2.26151e-05	0.00225149	2.79701
GROSS_HIF1A_TARGETS_UP	-0.874888	0.0506061	-5.33587	2.2878e-05	0.00225149	2.7861
HAN_JNK_SINGALING_UP	-0.456662	0.0265327	-5.33503	2.29243e-05	0.00225149	2.78419
REACTOME_OTHER_SEMAPHORIN_INTERACTIONS	-0.566636	0.00208355	-5.31956	2.37948e-05	0.00228543	2.749
LU_TUMOR_VASCULATURE_UP	-0.42167	0.0217846	-5.30361	2.4727e-05	0.00228543	2.71271
REACTOME_FCERI_MEDIATED_CAPLUS2_MOBILIZATION	-0.517025	0.0186771	-5.30334	2.47427e-05	0.00228543	2.71211
CROMER_TUMORIGENESIS_UP	-0.400593	0.0121151	-5.29634	2.51641e-05	0.00228543	2.69616
BIOCARTA_IL12_PATHWAY	-0.490162	0.0112318	-5.29333	2.53475e-05	0.00228543	2.6893
VALK_AML_CLUSTER_4	-0.543737	0.0153825	-5.27482	2.65043e-05	0.00235119	2.64716
SCHLESINGER_METHYLATED_DE_NOVO_IN_CANCER	-0.382386	0.00734665	-5.25548	2.77703e-05	0.00240978	2.60309
PID_IL12_STAT4_PATHWAY	-0.444096	0.0083207	-5.25146	2.80411e-05	0.00240978	2.59393
DORN_ADENOVIRUS_INFECTION_12HR_UP	-0.556023	0.015685	-5.2328	2.93336e-05	0.00248207	2.55137
REACTOME_PROCESSING_OF_SMDT1	0.565814	0.00356954	5.21974	3.02745e-05	0.00252288	2.52154
KIM_GLIS2_TARGETS_UP	-0.468587	-0.000849541	-5.20709	3.12143e-05	0.002539	2.49267
VART_KSHV_INFECTION_ANGIOGENIC_MARKERS_UP	-0.414706	0.00065858	-5.20475	3.13913e-05	0.002539	2.48733
RAGHAVACHARI_PLATELET_SPECIFIC_GENES	-0.378447	-0.00405582	-5.1884	3.26572e-05	0.00256123	2.44998
PID_LYSOPHOSPHOLIPID_PATHWAY	-0.450255	-3.09937e-05	-5.18779	3.27052e-05	0.00256123	2.44859
PID_INTEGRIN_A4B1_PATHWAY	-0.456073	0.0153321	-5.18329	3.30631e-05	0.00256123	2.43831
KHETCHOUMIAN_TRIM24_TARGETS_UP	-0.493093	0.000464308	-5.1682	3.42934e-05	0.00261095	2.4038
GRAHAM_NORMAL_QUIESCENT_VS_NORMAL_DIVIDING_UP	-0.400144	0.00722185	-5.16089	3.49052e-05	0.00261095	2.38709
FINETTI_BREAST_CANCER_KINOME_GREEN	-0.516908	-0.00729341	-5.15825	3.51292e-05	0.00261095	2.38105
KEGG_LEISHMANIA_INFECTION	-0.506442	0.0115256	-5.14726	3.60761e-05	0.00264558	2.35592
REACTOME_DSCAM_INTERACTIONS	-0.577975	0.0368096	-5.13252	3.73882e-05	0.00270573	2.32217
PID_TXA2PATHWAY	-0.500833	0.0115695	-5.11737	3.87862e-05	0.00277044	2.28749
BIOCARTA_TH1TH2_PATHWAY	-0.509191	0.00614756	-5.09322	4.11247e-05	0.00287273	2.23217
LIAN_LIPA_TARGETS_3M	-0.563008	0.00604053	-5.09026	4.14215e-05	0.00287273	2.22537
GRAHAM_CML_QUIESCENT_VS_CML_DIVIDING_UP	-0.689864	0.0151135	-5.08666	4.17851e-05	0.00287273	2.21712
BIOCARTA_NTHI_PATHWAY	-0.581674	0.0281074	-5.07286	4.32078e-05	0.00290714	2.18548
PHONG_TNF_RESPONSE_NOT_VIA_P38	-0.350943	0.0108938	-5.07157	4.33428e-05	0.00290714	2.18253
REACTOME_INTERLEUKIN_27_SIGNALING	-0.742483	0.0151793	-5.06536	4.40015e-05	0.00290721	2.16828
VERHAAK_GLIOBLASTOMA_MESENCHYMAL	-0.479557	0.00485243	-5.04824	4.58688e-05	0.00290721	2.12901
MAHAJAN_RESPONSE_TO_IL1A_UP	-0.446636	0.0141093	-5.04626	4.60898e-05	0.00290721	2.12447
LIANG_HEMATOPOIESIS_STEM_CELL_NUMBER_SMALL_VS_HUGE_DN	-0.377844	0.014334	-5.04554	4.61706e-05	0.00290721	2.12281
REACTOME_TOLL_LIKE_RECEPTOR_CASCADES	-0.34109	-8.0984e-05	-5.03637	4.72103e-05	0.00290721	2.10177
PHONG_TNF_TARGETS_UP	-0.599648	0.0174479	-5.03344	4.7548e-05	0.00290721	2.09503
SU_THYMUS	-0.47769	0.01057	-5.02953	4.80012e-05	0.00290721	2.08607
LEE_LIVER_CANCER_ACOX1_UP	-0.325814	0.00503888	-5.02933	4.80242e-05	0.00290721	2.08562
BOQUEST_STEM_CELL_DN	-0.370949	0.0164815	-5.02868	4.8101e-05	0.00290721	2.08411
PARK_APL_PATHOGENESIS_DN	-0.409439	-0.00851417	-5.00611	5.08124e-05	0.0030377	2.03229
JEON_SMAD6_TARGETS_UP	-0.542508	-0.000214718	-4.98511	5.34748e-05	0.00314099	1.98403
PID_CXCR4_PATHWAY	-0.335542	-0.000364967	-4.98202	5.38777e-05	0.00314099	1.97693
SAGIV_CD24_TARGETS_DN	-0.46079	0.0164716	-4.97903	5.42715e-05	0.00314099	1.97005
NIKOLSKY_BREAST_CANCER_16Q24_AMPLICON	0.482364	0.00298404	4.97486	5.48245e-05	0.00314099	1.96047
GROSS_HYPOXIA_VIA_ELK3_ONLY_UP	-0.495641	0.00403051	-4.96721	5.58547e-05	0.00316702	1.94288
PID_BCR_5PATHWAY	-0.462941	0.0144498	-4.9555	5.74698e-05	0.00316934	1.91594
REACTOME_TOLL_LIKE_RECEPTOR_4_TLR4_CASCADE	-0.328241	0.00274478	-4.94523	5.89247e-05	0.00316934	1.89231
TAKEDA_TARGETS_OF_NUP98_HOXA9_FUSION_10D_DN	-0.426589	-0.000863407	-4.94049	5.96085e-05	0.00316934	1.88141
TAKEDA_TARGETS_OF_NUP98_HOXA9_FUSION_16D_DN	-0.325134	-0.00808528	-4.93531	6.0365e-05	0.00316934	1.86949
REACTOME_INTERLEUKIN_3_INTERLEUKIN_5_AND_GM_CSF_SIGNALING	-0.449999	0.0120385	-4.93432	6.05108e-05	0.00316934	1.86721
PID_IL23_PATHWAY	-0.498879	0.0037039	-4.93382	6.0585e-05	0.00316934	1.86605
GAUSSMANN_MLL_AF4_FUSION_TARGETS_F_DN	-0.377705	0.00730484	-4.93242	6.07908e-05	0.00316934	1.86285
HINATA_NFKB_TARGETS_KERATINOCYTE_UP	-0.453325	0.0256302	-4.93236	6.07999e-05	0.00316934	1.86271
ICHIBA_GRAFT_VERSUS_HOST_DISEASE_D7_UP	-0.442856	0.0198558	-4.92717	6.1574e-05	0.00316934	1.85075
BOYAULT_LIVER_CANCER_SUBCLASS_G56_DN	-0.551976	0.0128104	-4.92309	6.21886e-05	0.00316934	1.84137
PID_S1P_S1P3_PATHWAY	-0.495954	-0.00484276	-4.92	6.26584e-05	0.00316934	1.83425
HIRSCH_CELLULAR_TRANSFORMATION_SIGNATURE_UP	-0.36974	0.00202686	-4.919	6.28105e-05	0.00316934	1.83196
TIAN_TNF_SIGNALING_VIA_NFKB	-0.719685	0.0368149	-4.91274	6.37762e-05	0.0031837	1.81754
ROSS_ACUTE_MYELOID_LEUKEMIA_CBF	-0.398714	0.0134607	-4.9048	6.50221e-05	0.0031837	1.79926
PID_GLYPICAN_1PATHWAY	-0.480909	0.00103776	-4.90374	6.51907e-05	0.0031837	1.79681
BIOCARTA_VIP_PATHWAY	-0.550678	-0.00452695	-4.90236	6.54105e-05	0.0031837	1.79363
MIYAGAWA_TARGETS_OF_EWSR1_ETS_FUSIONS_UP	-0.304351	0.0095052	-4.8946	6.66597e-05	0.00318941	1.77575
OSAWA_TNF_TARGETS	-0.700301	0.0502723	-4.89442	6.66877e-05	0.00318941	1.77536
SEKI_INFLAMMATORY_RESPONSE_LPS_UP	-0.487513	0.0136184	-4.88731	6.78548e-05	0.00321725	1.75896
LEIN_LOCALIZED_TO_DISTAL_AND_PROXIMAL_DENDRITES	-0.499729	0.0220985	-4.87464	6.99825e-05	0.00328978	1.72978
MCLACHLAN_DENTAL_CARIES_UP	-0.463733	0.00793307	-4.8651	7.16299e-05	0.00333868	1.70779
PARK_TRETINOIN_RESPONSE_AND_PML_RARA_FUSION	-0.491673	-0.00911386	-4.85839	7.2811e-05	0.00336388	1.69234
BIOCARTA_IL1R_PATHWAY	-0.553323	0.022186	-4.85513	7.33936e-05	0.00336388	1.68481
PID_PI3KCI_PATHWAY	-0.396453	0.00251026	-4.84793	7.46927e-05	0.00339512	1.66823
REACTOME_TOLL_LIKE_RECEPTOR_TLR1:TLR2_CASCADE	-0.330677	0.00356701	-4.84104	7.59605e-05	0.00342445	1.65232
STEGER_ADIPOGENESIS_DN	-0.490544	0.0180992	-4.82967	7.8096e-05	0.00348717	1.62612
PID_PS1_PATHWAY	-0.425251	0.0150704	-4.82693	7.86199e-05	0.00348717	1.6198
DANG_MYC_TARGETS_DN	-0.326511	-0.0011485	-4.80431	8.30843e-05	0.00365477	1.56761
REACTOME_SIGNALING_BY_PDGF	-0.489007	0.00299824	-4.80115	8.37274e-05	0.00365477	1.56032
CHEN_METABOLIC_SYNDROM_NETWORK	-0.303112	0.000884238	-4.79421	8.51592e-05	0.00368072	1.5443
XU_HGF_TARGETS_INDUCED_BY_AKT1_48HR_UP	-0.508217	0.02434	-4.79006	8.60265e-05	0.00368072	1.53472
JOHNSTONE_PARVB_TARGETS_3_UP	-0.394293	0.00781526	-4.78862	8.63296e-05	0.00368072	1.5314
RASHI_NFKB1_TARGETS	-0.680808	0.0318626	-4.77982	8.82045e-05	0.00373173	1.51109
PID_TCR_JNK_PATHWAY	-0.596155	0.0304485	-4.76865	9.0646e-05	0.00377719	1.48529
XU_HGF_SIGNALING_NOT_VIA_AKT1_48HR_UP	-0.457975	0.00903105	-4.76862	9.06525e-05	0.00377719	1.48523
HE_PTEN_TARGETS_UP	-0.428464	0.0242324	-4.75783	9.30729e-05	0.00384888	1.46033
REACTOME_ROLE_OF_PHOSPHOLIPIDS_IN_PHAGOCYTOSIS	-0.488572	-0.00770136	-4.74919	9.50588e-05	0.00390167	1.44038
REACTOME_INTERLEUKIN_35_SIGNALLING	-0.740907	0.044995	-4.72291	0.000101366	0.00412684	1.37967
REACTOME_MET_PROMOTES_CELL_MOTILITY	-0.437988	0.00967911	-4.72018	0.000102045	0.00412684	1.37336
DAVICIONI_TARGETS_OF_PAX_FOXO1_FUSIONS_UP	-0.348524	0.0122816	-4.71105	0.000104348	0.00418917	1.35227
ZHOU_INFLAMMATORY_RESPONSE_LPS_UP	-0.310983	0.0118398	-4.70453	0.000106026	0.00422567	1.3372
GOBERT_CORE_OLIGODENDROCYTE_DIFFERENTIATION	-0.442959	-0.00432708	-4.70012	0.000107176	0.00422928	1.32702
TAKEDA_TARGETS_OF_NUP98_HOXA9_FUSION_8D_DN	-0.364047	0.00330824	-4.6983	0.000107654	0.00422928	1.3228
REACTOME_CRMPS_IN_SEMA3A_SIGNALING	-0.393522	0.0427415	-4.68227	0.00011196	0.00436722	1.28576
ONDER_CDH1_TARGETS_2_DN	-0.286843	0.00362219	-4.64989	0.000121193	0.00469411	1.21088
PID_FRA_PATHWAY	-0.453788	0.0128153	-4.6413	0.000123768	0.00476033	1.19102
IYENGAR_RESPONSE_TO_ADIPOCYTE_FACTORS	-0.664308	0.0502458	-4.6315	0.000126773	0.00484203	1.16836
PID_ECADHERIN_NASCENT_AJ_PATHWAY	-0.34329	0.0110457	-4.62626	0.000128411	0.00485307	1.15624
DUTERTRE_ESTRADIOL_RESPONSE_6HR_DN	-0.343732	-0.00619857	-4.62221	0.000129688	0.00485307	1.14689
BIOCARTA_PS1_PATHWAY	-0.515589	0.0247512	-4.62165	0.000129868	0.00485307	1.14557
BIOCARTA_TERT_PATHWAY	-0.504223	0.0401696	-4.6176	0.000131162	0.00485307	1.13621
HESS_TARGETS_OF_HOXA9_AND_MEIS1_DN	-0.422142	0.00775897	-4.61372	0.000132412	0.00485307	1.12725
REACTOME_INTERFERON_GAMMA_SIGNALING	-0.430274	-0.00793713	-4.60798	0.000134288	0.00485307	1.11396
REACTOME_INTERLEUKIN_RECEPTOR_SHC_SIGNALING	-0.451041	0.0123912	-4.60714	0.000134565	0.00485307	1.11202
REACTOME_PECAM1_INTERACTIONS	-0.495474	0.00281688	-4.60392	0.000135631	0.00485307	1.10456
REACTOME_GPVI_MEDIATED_ACTIVATION_CASCADE	-0.425523	0.0106121	-4.60383	0.00013566	0.00485307	1.10436
SEITZ_NEOPLASTIC_TRANSFORMATION_BY_8P_DELETION_DN	-0.537991	-0.0033637	-4.60315	0.000135886	0.00485307	1.10279
WANG_IMMORTALIZED_BY_HOXA9_AND_MEIS1_UP	-0.496606	-0.0139544	-4.59781	0.000137673	0.00487054	1.09044
ZHANG_TARGETS_OF_EWSR1_FLI1_FUSION	-0.327228	0.0010348	-4.59516	0.00013857	0.00487054	1.08431
TSENG_ADIPOGENIC_POTENTIAL_DN	-0.414317	0.0216225	-4.5938	0.000139032	0.00487054	1.08117
CHYLA_CBFA2T3_TARGETS_UP	-0.28493	-0.00313494	-4.58667	0.000141481	0.00491715	1.06468
PARK_TRETINOIN_RESPONSE	-0.591345	-0.00474736	-4.58475	0.00014215	0.00491715	1.06021
PID_IFNG_PATHWAY	-0.422558	0.0180178	-4.57477	0.000145665	0.00500724	1.03714
HUMMERICH_SKIN_CANCER_PROGRESSION_UP	-0.302926	0.00903085	-4.57096	0.000147034	0.00502289	1.02831
KEGG_LEUKOCYTE_TRANSENDOTHELIAL_MIGRATION	-0.300971	-0.0077672	-4.56713	0.000148417	0.00503884	1.01947
REACTOME_DAP12_SIGNALING	-0.369647	0.00654859	-4.56284	0.000149988	0.00506093	1.00953
SCHAEFFER_PROSTATE_DEVELOPMENT_AND_CANCER_BOX5_UP	-0.652293	0.0203067	-4.56007	0.000151006	0.00506424	1.00313
COATES_MACROPHAGE_M1_VS_M2_DN	-0.300165	0.00521186	-4.55291	0.00015368	0.00510788	0.986555
GROSS_ELK3_TARGETS_DN	-0.473906	0.0254166	-4.55162	0.000154165	0.00510788	0.983579
REACTOME_INTERLEUKIN_10_SIGNALING	-0.506662	0.00388411	-4.54446	0.000156894	0.00516717	0.967008
KEGG_JAK_STAT_SIGNALING_PATHWAY	-0.295446	-0.00101161	-4.53785	0.000159457	0.0052203	0.951708
REACTOME_MAPK1_ERK2_ACTIVATION	-0.769996	0.033672	-4.53377	0.000161058	0.00524153	0.942271
MARSON_FOXP3_TARGETS_UP	-0.375065	0.016366	-4.52819	0.000163276	0.00528245	0.929356
THEILGAARD_NEUTROPHIL_AT_SKIN_WOUND_UP	-0.37151	-0.00434694	-4.51991	0.000166624	0.00535924	0.910189
REACTOME_REGULATION_OF_SIGNALING_BY_CBL	-0.470284	-0.00427634	-4.51423	0.000168962	0.00539795	0.89703
GROSS_ELK3_TARGETS_UP	-0.361147	-0.0166613	-4.51223	0.00016979	0.00539795	0.892412
REACTOME_TRAF6_MEDIATED_IRF7_ACTIVATION	-0.367752	0.0110599	-4.50518	0.00017275	0.0054605	0.876091
BIOCARTA_PTDINS_PATHWAY	-0.490825	0.0221337	-4.49562	0.000176845	0.00555799	0.853971
DORN_ADENOVIRUS_INFECTION_24HR_DN	-0.388156	0.013177	-4.47251	0.000187153	0.00584855	0.80048
TRAYNOR_RETT_SYNDROM_UP	-0.390676	0.00286133	-4.46169	0.000192185	0.00597186	0.775431
LANDIS_BREAST_CANCER_PROGRESSION_DN	-0.441526	-0.0170682	-4.45502	0.000195354	0.00603623	0.759993
LIM_MAMMARY_LUMINAL_MATURE_DN	-0.419015	0.00180173	-4.45261	0.000196513	0.00603811	0.754409
BIOCARTA_MEF2D_PATHWAY	-0.52669	0.0294135	-4.44386	0.000200773	0.00605238	0.734164
GROSS_HYPOXIA_VIA_ELK3_DN	-0.271768	0.00932462	-4.44252	0.000201431	0.00605238	0.731074
KEGG_NOTCH_SIGNALING_PATHWAY	-0.434062	0.00623412	-4.43821	0.000203571	0.00605238	0.721101
RANKIN_ANGIOGENIC_TARGETS_OF_VHL_HIF2A_DN	-0.625684	0.00215811	-4.43809	0.000203635	0.00605238	0.720801
KEGG_WNT_SIGNALING_PATHWAY	-0.316728	0.0100416	-4.43658	0.000204388	0.00605238	0.717321
BIOCARTA_LYM_PATHWAY	-0.433148	0.00761043	-4.43586	0.000204748	0.00605238	0.715657
WU_HBX_TARGETS_3_DN	-0.583239	0.0239284	-4.43427	0.000205547	0.00605238	0.711981
MISSIAGLIA_REGULATED_BY_METHYLATION_UP	-0.432276	0.0111793	-4.43117	0.000207118	0.00605238	0.704794
REACTOME_DAG_AND_IP3_SIGNALING	-0.38966	-0.000433695	-4.4294	0.000208019	0.00605238	0.700697
REACTOME_INTERLEUKIN_4_AND_INTERLEUKIN_13_SIGNALING	-0.392945	0.00542605	-4.42935	0.000208042	0.00605238	0.700593
KEGG_NEUROTROPHIN_SIGNALING_PATHWAY	-0.357019	0.0147779	-4.42732	0.000209082	0.00605238	0.695886
FRIDMAN_SENESCENCE_UP	-0.399328	0.00394504	-4.41868	0.000213562	0.00614968	0.675877
BROCKE_APOPTOSIS_REVERSED_BY_IL6	-0.309307	0.00929503	-4.41416	0.00021594	0.00618579	0.665423
DEMAGALHAES_AGING_UP	-0.43265	0.00115417	-4.40493	0.000220884	0.00628809	0.644059
PARK_OSTEOBLAST_DIFFERENTIATION_BY_PHENYLAMIL_UP	-0.586522	0.0312051	-4.40324	0.000221798	0.00628809	0.640163
PID_ATF2_PATHWAY	-0.352039	0.0227418	-4.3901	0.000229061	0.00645548	0.609755
GRANDVAUX_IRF3_TARGETS_UP	-0.684557	0.012323	-4.38835	0.00023005	0.00645548	0.605689
PID_IL6_7_PATHWAY	-0.474021	0.0159327	-4.38284	0.00023318	0.00651011	0.592935
JAATINEN_HEMATOPOIETIC_STEM_CELL_DN	-0.335074	-0.0107562	-4.37979	0.000234931	0.00652586	0.585877
DIAZ_CHRONIC_MEYLOGENOUS_LEUKEMIA_DN	-0.368798	0.00301536	-4.37436	0.000238076	0.00656595	0.573328
TSAI_RESPONSE_TO_IONIZING_RADIATION	-0.242298	0.0168469	-4.37319	0.000238762	0.00656595	0.570614
KIM_LRRC3B_TARGETS	-0.600705	0.00615829	-4.3637	0.000244386	0.00664429	0.548645
HUANG_FOXA2_TARGETS_DN	-0.401188	-0.0142725	-4.36283	0.000244905	0.00664429	0.546642
PID_ENDOTHELIN_PATHWAY	-0.375924	0.012582	-4.3619	0.000245467	0.00664429	0.54448
REACTOME_TRNA_PROCESSING	0.556334	0.00652158	4.35936	0.000247	0.00664429	0.538606
NAKAMURA_METASTASIS_MODEL_DN	-0.326791	0.00408527	-4.35753	0.000248114	0.00664429	0.534363
BIOCARTA_HES_PATHWAY	-0.590069	0.0399741	-4.3563	0.000248859	0.00664429	0.531534
REACTOME_DAP12_INTERACTIONS	-0.343661	0.00975544	-4.35368	0.000250467	0.00665493	0.525455
KANG_AR_TARGETS_UP	-0.446134	-0.0236731	-4.34625	0.000255071	0.00674465	0.508273
REACTOME_DOWNSTREAM_SIGNAL_TRANSDUCTION	-0.528451	0.00499928	-4.3404	0.000258755	0.00680935	0.494742
KEGG_FC_GAMMA_R_MEDIATED_PHAGOCYTOSIS	-0.3239	0.00897221	-4.33702	0.000260912	0.00682066	0.486911
GUTIERREZ_WALDENSTROEMS_MACROGLOBULINEMIA_1_DN	-0.65111	-0.0264494	-4.33529	0.000262017	0.00682066	0.482923
REACTOME_COSTIMULATION_BY_THE_CD28_FAMILY	-0.313876	0.00487067	-4.33391	0.000262905	0.00682066	0.479731
MEDINA_SMARCA4_TARGETS	-0.307601	0.00995896	-4.32237	0.000270453	0.00698352	0.453033
NIKOLSKY_BREAST_CANCER_20Q12_Q13_AMPLICON	-0.344548	0.00227405	-4.3166	0.000274306	0.00704992	0.439688
RAMJAUN_APOPTOSIS_BY_TGFB1_VIA_MAPK1_DN	-0.488835	-0.0104162	-4.31452	0.000275711	0.00705308	0.434868
SCIAN_INVERSED_TARGETS_OF_TP53_AND_TP73_DN	-0.33856	0.00780382	-4.31254	0.000277052	0.00705457	0.430292
REACTOME_SIGNALING_BY_MET	-0.307688	0.0056199	-4.3045	0.000282569	0.00712426	0.411695
QI_PLASMACYTOMA_UP	-0.299794	-0.000721461	-4.30285	0.000283715	0.00712426	0.407878
ABBUD_LIF_SIGNALING_1_UP	-0.333349	-0.0149486	-4.30228	0.000284111	0.00712426	0.406561
ELVIDGE_HYPOXIA_UP	-0.504414	0.02834	-4.30105	0.000284971	0.00712426	0.403713
MANALO_HYPOXIA_UP	-0.444457	-0.0016799	-4.28746	0.000294629	0.0073324	0.372279
SESTO_RESPONSE_TO_UV_C8	-0.327872	0.0103393	-4.28188	0.000298686	0.00739604	0.359381
BIOCARTA_WNT_PATHWAY	-0.403634	0.0196876	-4.28026	0.000299876	0.00739604	0.355632
REACTOME_ACTIVATION_OF_NIMA_KINASES_NEK9_NEK6_NEK7	0.731015	0.00450386	4.2762	0.000302878	0.00743674	0.346238
ISHIKAWA_STING_SIGNALING	-0.594011	0.0501767	-4.2743	0.00030429	0.0074382	0.341853
BOYLAN_MULTIPLE_MYELOMA_PCA1_UP	-0.321408	-0.000689301	-4.2658	0.000310702	0.00753591	0.322191
REACTOME_SIGNALING_BY_ERYTHROPOIETIN	-0.480825	0.00098383	-4.26413	0.000311979	0.00753591	0.318324
REACTOME_CD209_DC_SIGN_SIGNALING	-0.379359	0.00972135	-4.26358	0.000312398	0.00753591	0.317059
REACTOME_NRCAM_INTERACTIONS	-0.700723	0.0273829	-4.25862	0.000316223	0.00759487	0.305584
ZHANG_RESPONSE_TO_CANTHARIDIN_UP	-0.49709	0.00321069	-4.2536	0.000320134	0.00765537	0.293995
KEGG_NOD_LIKE_RECEPTOR_SIGNALING_PATHWAY	-0.340195	0.0078851	-4.24348	0.000328177	0.00775336	0.270601
REACTOME_RUNX3_REGULATES_WNT_SIGNALING	-0.618226	0.034411	-4.24345	0.000328208	0.00775336	0.270511
OHASHI_AURKB_TARGETS	0.651369	0.00404773	4.24313	0.000328461	0.00775336	0.269787
PID_IGF1_PATHWAY	-0.474167	2.27427e-05	-4.24045	0.000330625	0.00776324	0.263594
PID_NECTIN_PATHWAY	-0.385178	-0.00141976	-4.23789	0.000332713	0.00776324	0.257661
PID_EPO_PATHWAY	-0.523387	0.00598158	-4.23739	0.000333114	0.00776324	0.256526
HOSHIDA_LIVER_CANCER_SUBCLASS_S1	-0.296735	0.00450544	-4.23507	0.000335017	0.00777465	0.251155
REACTOME_DDX58_IFIH1_MEDIATED_INDUCTION_OF_INTERFERON_ALPHA_BETA	-0.341984	0.00887219	-4.22501	0.000343385	0.00793079	0.227899
GENTILE_UV_HIGH_DOSE_UP	-0.512104	-7.42399e-05	-4.22353	0.000344629	0.00793079	0.224491
NIKOLSKY_BREAST_CANCER_10Q22_AMPLICON	-0.711249	-0.00741688	-4.21157	0.000354884	0.00812232	0.196855
ODONNELL_TFRC_TARGETS_UP	-0.278228	0.00143715	-4.2104	0.000355905	0.00812232	0.194145
MARKS_HDAC_TARGETS_DN	-0.486688	-0.00267818	-4.20788	0.000358111	0.00813888	0.188323
SCHUHMACHER_MYC_TARGETS_DN	-0.533524	0.00153527	-4.20294	0.000362473	0.00820412	0.176913
REACTOME_NOTCH4_INTRACELLULAR_DOMAIN_REGULATES_TRANSCRIPTION	-0.559721	0.0138992	-4.19699	0.000367804	0.00821053	0.163155
LIANG_SILENCED_BY_METHYLATION_2	-0.538166	0.0178808	-4.19679	0.00036798	0.00821053	0.162703
LIU_VAV3_PROSTATE_CARCINOGENESIS_UP	-0.380914	0.00185073	-4.19638	0.000368354	0.00821053	0.161746
GRAESSMANN_RESPONSE_TO_MC_AND_SERUM_DEPRIVATION_UP	-0.280486	-0.0019169	-4.19596	0.000368728	0.00821053	0.160791
TESAR_JAK_TARGETS_MOUSE_ES_D3_UP	-0.564341	0.0146703	-4.19283	0.00037157	0.00824045	0.153555
DASU_IL6_SIGNALING_UP	-0.465442	-0.00282282	-4.18509	0.000378684	0.00825077	0.135684
REACTOME_SIGNALING_BY_RECEPTOR_TYROSINE_KINASES	-0.251089	0.00491402	-4.18412	0.00037959	0.00825077	0.133433
WALLACE_PROSTATE_CANCER_RACE_UP	-0.34837	-0.0044	-4.18391	0.000379783	0.00825077	0.132952
BIOCARTA_PCAF_PATHWAY	-0.483944	0.024905	-4.18174	0.000381808	0.00825077	0.127943
GRASEMANN_RETINOBLASTOMA_WITH_6P_AMPLIFICATION	0.563137	0.00820436	4.18054	0.000382929	0.00825077	0.12518
HECKER_IFNB1_TARGETS	-0.395209	-0.0108179	-4.17928	0.000384119	0.00825077	0.122257
BIOCARTA_GRANULOCYTES_PATHWAY	-0.458454	0.000155118	-4.17815	0.000385185	0.00825077	0.119646
KOKKINAKIS_METHIONINE_DEPRIVATION_96HR_UP	-0.264056	-0.00814409	-4.17783	0.000385484	0.00825077	0.118913
VARELA_ZMPSTE24_TARGETS_UP	-0.401496	0.0124253	-4.17778	0.000385536	0.00825077	0.118787
HUANG_GATA2_TARGETS_UP	-0.287828	-0.009933	-4.17484	0.000388318	0.00827809	0.112013
MATTIOLI_MULTIPLE_MYELOMA_WITH_14Q32_TRANSLOCATIONS	-0.499128	-0.0151586	-4.16901	0.000393907	0.00836482	0.0985489
TAKEDA_TARGETS_OF_NUP98_HOXA9_FUSION_6HR_DN	-0.325734	-0.000599309	-4.16713	0.000395728	0.00837117	0.0942036
DANG_REGULATED_BY_MYC_DN	-0.260029	-0.00450184	-4.15896	0.000403728	0.00850767	0.07535
HELLER_HDAC_TARGETS_SILENCED_BY_METHYLATION_DN	-0.263575	0.00232087	-4.1546	0.000408069	0.00854721	0.0652752
WINZEN_DEGRADED_VIA_KHSRP	-0.355767	0.0157744	-4.15383	0.000408837	0.00854721	0.063504
BIOCARTA_FMLP_PATHWAY	-0.44961	0.019626	-4.15142	0.000411259	0.00854721	0.0579379
HERNANDEZ_ABERRANT_MITOSIS_BY_DOCETACEL_2NM_UP	-0.346324	-0.0128764	-4.15086	0.00041182	0.00854721	0.0566543
CHAUHAN_RESPONSE_TO_METHOXYESTRADIOL_DN	-0.295448	-0.001916	-4.14594	0.00041682	0.00856993	0.0452885
BIOCARTA_KERATINOCYTE_PATHWAY	-0.354271	0.0264277	-4.14379	0.000419023	0.00856993	0.0403224
ZHAN_MULTIPLE_MYELOMA_CD1_DN	-0.37693	-0.000164958	-4.14378	0.000419028	0.00856993	0.0403104
BOYAULT_LIVER_CANCER_SUBCLASS_G5_DN	-0.477016	0.0118483	-4.14367	0.000419148	0.00856993	0.0400423
FARMER_BREAST_CANCER_CLUSTER_1	-0.42641	-0.0101684	-4.14133	0.00042155	0.00858419	0.03466
BIOCARTA_NO2IL12_PATHWAY	-0.41002	-0.0157005	-4.13996	0.000422966	0.00858419	0.0315001
BIOCARTA_PAR1_PATHWAY	-0.39604	0.0157229	-4.13769	0.000425334	0.00860051	0.0262418
REN_ALVEOLAR_RHABDOMYOSARCOMA_UP	-0.311052	0.00883714	-4.13174	0.000431575	0.00869295	0.0125241
BIOCARTA_EPONFKB_PATHWAY	-0.612407	0.0220996	-4.13033	0.000433067	0.00869295	0.0092733
REACTOME_TRNA_PROCESSING_IN_THE_MITOCHONDRION	0.832062	-0.000237719	4.12078	0.00044332	0.0088664	-0.0127626
DUNNE_TARGETS_OF_AML1_MTG8_FUSION_DN	-0.368311	-0.00412976	-4.1169	0.000447548	0.00891853	-0.0217015
PID_PDGFRB_PATHWAY	-0.290063	0.00858387	-4.10672	0.000458854	0.00911082	-0.0451926
VANLOO_SP3_TARGETS_UP	-0.600451	-0.000198019	-4.10312	0.000462911	0.00915832	-0.0534815
LINDSTEDT_DENDRITIC_CELL_MATURATION_B	-0.371095	0.00617487	-4.10041	0.000466003	0.00918644	-0.0597488
VISALA_RESPONSE_TO_HEAT_SHOCK_AND_AGING_UP	-0.450138	0.0134828	-4.09815	0.00046858	0.00920425	-0.064941
PETROVA_ENDOTHELIUM_LYMPHATIC_VS_BLOOD_DN	-0.297237	0.0167176	-4.09478	0.000472463	0.0092475	-0.0727109
BRACHAT_RESPONSE_TO_CISPLATIN	-0.506347	0.0102037	-4.0912	0.000476623	0.00929269	-0.0809636
PID_REELIN_PATHWAY	-0.422272	0.014793	-4.08978	0.000478288	0.00929269	-0.0842466
RUTELLA_RESPONSE_TO_HGF_VS_CSF2RB_AND_IL4_UP	-0.284524	0.0016246	-4.08846	0.000479841	0.00929269	-0.0872971
ZHOU_INFLAMMATORY_RESPONSE_LIVE_UP	-0.319538	0.0068455	-4.08674	0.000481863	0.00929911	-0.0912564
PARK_TRETINOIN_RESPONSE_AND_RARA_PLZF_FUSION	-0.446724	-0.0199794	-4.08401	0.000485089	0.00932863	-0.0975365
WAESCH_ANAPHASE_PROMOTING_COMPLEX	0.601691	-0.0176463	4.08117	0.00048848	0.00934058	-0.104094
REACTOME_REGULATION_OF_IFNG_SIGNALING	-0.594872	0.0166802	-4.08065	0.000489107	0.00934058	-0.105301
GRAHAM_CML_DIVIDING_VS_NORMAL_QUIESCENT_DN	-0.307456	-0.00905969	-4.07649	0.000494106	0.00934915	-0.114874
REACTOME_RET_SIGNALING	-0.462158	0.000802057	-4.07621	0.000494445	0.00934915	-0.115519
DAUER_STAT3_TARGETS_UP	-0.37435	0.0211216	-4.07489	0.000496043	0.00934915	-0.118556
HEDENFALK_BREAST_CANCER_BRACX_UP	-0.560767	0.0370917	-4.07464	0.000496355	0.00934915	-0.119149
DAZARD_UV_RESPONSE_CLUSTER_G3	-0.431492	0.0142002	-4.07059	0.000501294	0.00940996	-0.128469
LEE_LIVER_CANCER_MYC_TGFA_UP	-0.350722	-0.00477313	-4.06518	0.000507987	0.00948873	-0.140951
REACTOME_TRAF6_MEDIATED_NF_KB_ACTIVATION	-0.509479	0.00917951	-4.06341	0.000510192	0.00948873	-0.145027
KYNG_RESPONSE_TO_H2O2_VIA_ERCC6	-0.433913	0.0118932	-4.06303	0.000510666	0.00948873	-0.145902
WORSCHECH_TUMOR_EVASION_AND_TOLEROGENICITY_DN	-0.41838	-0.0246408	-4.05676	0.000518564	0.00960303	-0.160344
WU_HBX_TARGETS_2_DN	-0.595846	0.0194698	-4.053	0.000523356	0.00964636	-0.169
REACTOME_INTERLEUKIN_20_FAMILY_SIGNALING	-0.473344	-0.0113084	-4.05089	0.000526063	0.00964636	-0.173856
ROSS_AML_WITH_CBFB_MYH11_FUSION	-0.445908	-0.00243671	-4.05081	0.000526165	0.00964636	-0.174038
ELVIDGE_HIF1A_TARGETS_DN	-0.569941	0.0204775	-4.04412	0.000534846	0.00966846	-0.189436
KIM_GERMINAL_CENTER_T_HELPER_UP	-0.317031	-0.000656271	-4.04341	0.000535783	0.00966846	-0.191083
REN_MIF_TARGETS_DN	-0.748059	0.0456027	-4.0431	0.000536191	0.00966846	-0.191799
REACTOME_SIGNALING_BY_INTERLEUKINS	-0.228749	-0.000952888	-4.04266	0.000536761	0.00966846	-0.192799
REACTOME_TRNA_MODIFICATION_IN_THE_NUCLEUS_AND_CYTOSOL	0.545555	-0.00639296	4.04202	0.000537613	0.00966846	-0.194291
REACTOME_CYTOKINE_SIGNALING_IN_IMMUNE_SYSTEM	-0.221108	-0.0020848	-4.04178	0.000537918	0.00966846	-0.194824
SCHEIDEREIT_IKK_TARGETS	-0.567621	0.0304991	-4.03853	0.000542225	0.00969286	-0.202328
GAUSSMANN_MLL_AF4_FUSION_TARGETS_F_UP	-0.334007	0.00690987	-4.0372	0.000543984	0.00969286	-0.205375
ROSS_AML_WITH_AML1_ETO_FUSION	-0.346836	0.00652481	-4.03677	0.000544562	0.00969286	-0.206375
REACTOME_TOLL_LIKE_RECEPTOR_9_TLR9_CASCADE	-0.318546	0.00502416	-4.03033	0.000553208	0.00981498	-0.221194
ZERBINI_RESPONSE_TO_SULINDAC_UP	-0.718975	0.00144629	-4.02888	0.000555167	0.00981806	-0.22452
PID_AMB2_NEUTROPHILS_PATHWAY	-0.355363	-0.00858804	-4.02716	0.000557508	0.00982787	-0.228479
REACTOME_FICOLINS_BIND_TO_REPETITIVE_CARBOHYDRATE_STRUCTURES_ON_THE_TARGET_CELL_SURFACE	-0.642296	0.0259462	-4.02334	0.000562745	0.0098885	-0.237275
BIOCARTA_ARAP_PATHWAY	-0.440856	0.0325275	-4.01657	0.00057215	0.0100217	-0.252865
FOSTER_TOLERANT_MACROPHAGE_DN	-0.279479	0.00774339	-4.01324	0.000576828	0.0100716	-0.260525
CUI_TCF21_TARGETS_2_DN	-0.292837	-0.00149067	-4.01172	0.000578971	0.010077	-0.264013
GRATIAS_RETINOBLASTOMA_16Q24	0.660375	0.00584056	4.00844	0.000583639	0.010098	-0.271565
HASLINGER_B_CLL_WITH_17P13_DELETION	-0.399217	0.0191334	-4.00705	0.000585621	0.010098	-0.274754
MOROSETTI_FACIOSCAPULOHUMERAL_MUSCULAR_DISTROPHY_DN	-0.485472	0.00848031	-4.006	0.000587132	0.010098	-0.277178
BRACHAT_RESPONSE_TO_METHOTREXATE_DN	-0.373946	-0.0124159	-4.00573	0.000587521	0.010098	-0.2778
REACTOME_TRNA_MODIFICATION_IN_THE_MITOCHONDRION	0.681351	-0.0366945	4.00157	0.000593528	0.0101695	-0.287367
PID_HEDGEHOG_GLI_PATHWAY	-0.347883	0.0146873	-3.99814	0.000598529	0.0102029	-0.295259
BIOCARTA_CPSF_PATHWAY	0.648773	0.00494993	3.99769	0.000599186	0.0102029	-0.29629
GAUSSMANN_MLL_AF4_FUSION_TARGETS_B_DN	-0.55368	0.0419984	-3.99561	0.000602243	0.0102233	-0.301075
PID_IL27_PATHWAY	-0.524623	0.00517801	-3.98981	0.000610836	0.0103372	-0.314398
KEGG_NATURAL_KILLER_CELL_MEDIATED_CYTOTOXICITY	-0.287814	0.00542077	-3.98593	0.00061667	0.0104039	-0.323337
PID_FCER1_PATHWAY	-0.356568	-9.30608e-05	-3.98416	0.000619333	0.0104169	-0.327388
REACTOME_FBXW7_MUTANTS_AND_NOTCH1_IN_CANCER	0.474837	-0.0256509	3.97908	0.000627071	0.0104513	-0.339062
REACTOME_GOLGI_CISTERNAE_PERICENTRIOLAR_STACK_REORGANIZATION	0.561152	-0.00825374	3.97898	0.000627235	0.0104513	-0.339308
PID_AR_TF_PATHWAY	-0.310858	0.0137037	-3.97817	0.000628474	0.0104513	-0.341163
MISHRA_CARCINOMA_ASSOCIATED_FIBROBLAST_UP	-0.449475	-0.0104895	-3.97722	0.000629942	0.0104513	-0.343357
REACTOME_CA2PLUS_PATHWAY	-0.315986	0.00161264	-3.97661	0.000630879	0.0104513	-0.344755
MEISSNER_NPC_HCP_WITH_H3K4ME2	-0.26225	-0.00297131	-3.97404	0.000634846	0.0104854	-0.350648
BIOCARTA_SM_PATHWAY	0.843519	-0.0407185	3.97208	0.000637896	0.0105043	-0.355154
KYNG_NORMAL_AGING_UP	-0.496235	-0.00157437	-3.96892	0.000642852	0.0105376	-0.36243
PID_IL8_CXCR1_PATHWAY	-0.443205	-0.00819078	-3.96794	0.000644387	0.0105376	-0.364672
LENAOUR_DENDRITIC_CELL_MATURATION_UP	-0.290695	-0.00139153	-3.9669	0.000646034	0.0105376	-0.367071
JACKSON_DNMT1_TARGETS_DN	-0.523971	0.0441274	-3.96587	0.000647663	0.0105376	-0.369439
BIOCARTA_41BB_PATHWAY	-0.543233	0.0420253	-3.96471	0.000649499	0.0105376	-0.3721
BIOCARTA_AKAP13_PATHWAY	-0.409102	-0.00473778	-3.95854	0.000659365	0.0106662	-0.386271
ELVIDGE_HYPOXIA_BY_DMOG_UP	-0.492169	0.029663	-3.95308	0.000668214	0.0107777	-0.398802
BROWNE_HCMV_INFECTION_20HR_DN	-0.373819	0.0115226	-3.94962	0.00067389	0.0108374	-0.406751
PID_P38_GAMMA_DELTA_PATHWAY	-0.456858	0.0174524	-3.9462	0.000679549	0.0108791	-0.414611
BOYAULT_LIVER_CANCER_SUBCLASS_G56_UP	-0.654637	0.0426738	-3.94338	0.000684245	0.0108791	-0.421083
PID_REG_GR_PATHWAY	-0.363506	0.0126124	-3.94267	0.000685437	0.0108791	-0.422718
PID_CD40_PATHWAY	-0.425327	-0.0029917	-3.94242	0.000685847	0.0108791	-0.42328
CHEN_HOXA5_TARGETS_6HR_DN	-0.768757	0.0417599	-3.94157	0.000687282	0.0108791	-0.425244
ZHAN_V2_LATE_DIFFERENTIATION_GENES	-0.385987	0.00804181	-3.94093	0.000688349	0.0108791	-0.426703
OSADA_ASCL1_TARGETS_UP	-0.314439	0.00896954	-3.93824	0.000692883	0.0109128	-0.432872
KEGG_FC_EPSILON_RI_SIGNALING_PATHWAY	-0.326189	0.00582736	-3.93732	0.000694454	0.0109128	-0.435
BOYAULT_LIVER_CANCER_SUBCLASS_G1_UP	-0.329962	0.00966381	-3.93195	0.000703618	0.0110254	-0.447319
DASU_IL6_SIGNALING_SCAR_UP	-0.436884	-0.00378157	-3.92503	0.000715613	0.0111814	-0.463201
JOHANSSON_BRAIN_CANCER_EARLY_VS_LATE_DN	-0.337847	-0.00309491	-3.92278	0.000719548	0.0112111	-0.468353
ZHENG_IL22_SIGNALING_UP	-0.365486	-0.00815018	-3.91845	0.000727191	0.0112873	-0.47828
ZHAN_MULTIPLE_MYELOMA_CD1_VS_CD2_DN	-0.34311	-0.00232684	-3.91769	0.000728543	0.0112873	-0.480025
PEDRIOLI_MIR31_TARGETS_DN	-0.254568	-0.00331056	-3.91577	0.000731974	0.0112895	-0.484439
HAN_SATB1_TARGETS_UP	-0.235517	-0.00224091	-3.91531	0.000732793	0.0112895	-0.48549
REACTOME_NOTCH2_INTRACELLULAR_DOMAIN_REGULATES_TRANSCRIPTION	-0.504359	0.0122268	-3.90937	0.000743493	0.0114224	-0.499108
ELVIDGE_HIF1A_AND_HIF2A_TARGETS_DN	-0.524451	0.0249839	-3.90802	0.000745957	0.0114283	-0.502215
REACTOME_SEMA3A_PLEXIN_REPULSION_SIGNALING_BY_INHIBITING_INTEGRIN_ADHESION	-0.430514	0.0169317	-3.90072	0.000759362	0.0115803	-0.518944
HINATA_NFKB_TARGETS_FIBROBLAST_UP	-0.475406	0.0247478	-3.90033	0.000760091	0.0115803	-0.519845
GARGALOVIC_RESPONSE_TO_OXIDIZED_PHOSPHOLIPIDS_TURQUOISE_DN	0.591883	0.0155309	3.89204	0.000775621	0.0117843	-0.538842
YIH_RESPONSE_TO_ARSENITE_C5	-0.532435	0.0287778	-3.88501	0.000789037	0.0118449	-0.554946
BURTON_ADIPOGENESIS_7	-0.341927	-0.00785007	-3.88461	0.000789809	0.0118449	-0.555864
FALVELLA_SMOKERS_WITH_LUNG_CANCER	-0.301464	0.0235705	-3.88448	0.000790048	0.0118449	-0.556148
REACTOME_TRNA_PROCESSING_IN_THE_NUCLEUS	0.504601	0.00793115	3.88437	0.000790272	0.0118449	-0.556414
REACTOME_SEMAPHORIN_INTERACTIONS	-0.301376	0.000163842	-3.88431	0.000790375	0.0118449	-0.556536
SHIN_B_CELL_LYMPHOMA_CLUSTER_9	-0.337991	-0.00410354	-3.88214	0.000794576	0.0118546	-0.561514
REACTOME_SYNTHESIS_OF_WYBUTOSINE_AT_G37_OF_TRNA_PHE	0.67151	0.000422276	3.88108	0.00079664	0.0118546	-0.563951
REACTOME_DISEASES_OF_IMMUNE_SYSTEM	-0.47209	9.06706e-05	-3.88047	0.00079783	0.0118546	-0.565352
REACTOME_ASSEMBLY_OF_COLLAGEN_FIBRILS_AND_OTHER_MULTIMERIC_STRUCTURES	-0.408728	-0.00685623	-3.87953	0.00079965	0.0118546	-0.567491
REACTOME_REGULATION_OF_BETA_CELL_DEVELOPMENT	-0.301479	0.023139	-3.8741	0.000810305	0.0119803	-0.57992
REACTOME_IKBA_VARIANT_LEADS_TO_EDA_ID	-0.56833	0.0324497	-3.86894	0.000820574	0.0120996	-0.591743
KEGG_RIG_I_LIKE_RECEPTOR_SIGNALING_PATHWAY	-0.34058	0.0212453	-3.86778	0.000822901	0.0121015	-0.594402
REACTOME_TRAF3_DEPENDENT_IRF_ACTIVATION_PATHWAY	-0.566011	0.0027592	-3.86097	0.000836688	0.0122581	-0.609999
SASSON_RESPONSE_TO_FORSKOLIN_UP	-0.342488	0.0101151	-3.86032	0.00083801	0.0122581	-0.611481
AZARE_NEOPLASTIC_TRANSFORMATION_BY_STAT3_UP	-0.258399	0.0189359	-3.85377	0.000851493	0.0124223	-0.626464
PID_TCPTP_PATHWAY	-0.363866	0.0012762	-3.85104	0.000857191	0.0124724	-0.632723
LEE_LIVER_CANCER_MYC_E2F1_UP	-0.284835	-0.0247595	-3.84722	0.00086521	0.0125558	-0.641462
KASLER_HDAC7_TARGETS_1_DN	-0.450163	-0.0105137	-3.8447	0.000870522	0.0125953	-0.647207
KEGG_T_CELL_RECEPTOR_SIGNALING_PATHWAY	-0.30165	0.0162491	-3.8432	0.00087371	0.0125953	-0.650638
PID_P53_DOWNSTREAM_PATHWAY	-0.326233	0.00540671	-3.84269	0.000874802	0.0125953	-0.651809
MASRI_RESISTANCE_TO_TAMOXIFEN_AND_AROMATASE_INHIBITORS_DN	-0.508093	0.0071402	-3.84137	0.000877616	0.0126028	-0.654824
MORI_PRE_BI_LYMPHOCYTE_DN	-0.257356	-0.0152873	-3.8353	0.000890706	0.0127575	-0.668716
PHONG_TNF_RESPONSE_VIA_P38_PARTIAL	-0.278169	-0.00395894	-3.83386	0.000893828	0.012769	-0.671999
KEGG_AMINOACYL_TRNA_BIOSYNTHESIS	0.53447	0.00891206	3.83088	0.000900349	0.0127801	-0.678821
CAIRO_PML_TARGETS_BOUND_BY_MYC_DN	-0.500816	-0.0013492	-3.82949	0.000903389	0.0127801	-0.681983
TORCHIA_TARGETS_OF_EWSR1_FLI1_FUSION_DN	-0.233965	2.33678e-05	-3.82778	0.00090716	0.0127801	-0.685892
BEGUM_TARGETS_OF_PAX3_FOXO1_FUSION_DN	-0.267115	0.00813659	-3.82777	0.000907202	0.0127801	-0.685934
GRAHAM_CML_QUIESCENT_VS_NORMAL_DIVIDING_UP	-0.47544	0.0105831	-3.82754	0.000907694	0.0127801	-0.686443
HOLLERN_SOLID_NODULAR_BREAST_TUMOR_DN	-0.469703	-0.00255871	-3.82705	0.000908782	0.0127801	-0.687567
KEGG_TYPE_II_DIABETES_MELLITUS	-0.31908	0.00890362	-3.82611	0.000910873	0.0127801	-0.689723
REACTOME_REGULATION_OF_ACTIN_DYNAMICS_FOR_PHAGOCYTIC_CUP_FORMATION	-0.350063	0.0178941	-3.82224	0.000919494	0.0128682	-0.698562
HORIUCHI_WTAP_TARGETS_UP	-0.310108	-0.0161905	-3.8185	0.00092792	0.0129532	-0.70712
REACTOME_PROTEIN_REPAIR	0.583958	-0.0238159	3.81618	0.000933172	0.0129586	-0.712413
GAURNIER_PSMD4_TARGETS	-0.465757	-0.016726	-3.81537	0.000934999	0.0129586	-0.714249
REACTOME_PLATELET_CALCIUM_HOMEOSTASIS	-0.350244	0.012208	-3.81445	0.000937106	0.0129586	-0.71636
REACTOME_VEGFR2_MEDIATED_CELL_PROLIFERATION	-0.416854	0.00677259	-3.81418	0.000937729	0.0129586	-0.716984
KUROZUMI_RESPONSE_TO_ONCOCYTIC_VIRUS	-0.35018	-0.00882465	-3.81192	0.00094289	0.0129972	-0.722132
GALLUZZI_PREVENT_MITOCHONDIAL_PERMEABILIZATION	-0.504222	0.0180812	-3.80517	0.000958524	0.0131797	-0.737556
REACTOME_COLLAGEN_DEGRADATION	-0.457405	-0.00901337	-3.79734	0.000976961	0.0133997	-0.755425
KEGG_APOPTOSIS	-0.310397	0.012455	-3.79279	0.000987836	0.0134475	-0.765806
ZHAN_MULTIPLE_MYELOMA_HP_UP	-0.394562	0.00950743	-3.79203	0.000989677	0.0134475	-0.767551
PID_P38_MKK3_6PATHWAY	-0.445284	0.00715558	-3.79156	0.000990797	0.0134475	-0.768612
BROWNE_HCMV_INFECTION_18HR_DN	-0.27533	0.000997548	-3.79091	0.00099238	0.0134475	-0.770109
DUTERTRE_ESTRADIOL_RESPONSE_24HR_DN	-0.291063	-0.00361969	-3.79042	0.000993568	0.0134475	-0.771231
MCCLUNG_COCAINE_REWARD_5D	-0.35095	0.00652412	-3.78969	0.00099532	0.0134475	-0.772883
ONO_FOXP3_TARGETS_DN	-0.334289	-0.00555231	-3.78852	0.000998176	0.0134475	-0.77557
ODONNELL_TARGETS_OF_MYC_AND_TFRC_UP	-0.348079	-0.0263209	-3.78776	0.00100001	0.0134475	-0.777289
REACTOME_VITAMIN_B1_THIAMIN_METABOLISM	0.550177	0.00824131	3.78412	0.00100891	0.0135139	-0.785599
REACTOME_PROCESSING_OF_INTRONLESS_PRE_MRNAS	0.566948	0.0166774	3.78373	0.00100986	0.0135139	-0.78648
REACTOME_MITOCHONDRIAL_CALCIUM_ION_TRANSPORT	0.369625	0.000305811	3.78192	0.00101432	0.0135407	-0.790615
ZHOU_INFLAMMATORY_RESPONSE_FIMA_UP	-0.229374	0.0131265	-3.77862	0.00102251	0.0136169	-0.798151
BROWN_MYELOID_CELL_DEVELOPMENT_UP	-0.32739	-0.0048463	-3.77462	0.0010325	0.0137167	-0.807264
LINDGREN_BLADDER_CANCER_CLUSTER_3_DN	-0.261474	0.00374313	-3.77195	0.00103923	0.0137353	-0.813356
RHEIN_ALL_GLUCOCORTICOID_THERAPY_UP	-0.294217	-0.00227277	-3.7719	0.00103935	0.0137353	-0.813462
REACTOME_RRNA_PROCESSING_IN_THE_MITOCHONDRION	0.776366	-0.0216148	3.77109	0.00104139	0.0137353	-0.815302
LEIN_ASTROCYTE_MARKERS	-0.306367	-0.00928366	-3.77008	0.00104397	0.0137364	-0.817621
NOJIMA_SFRP2_TARGETS_UP	-0.501292	0.0119586	-3.76893	0.00104689	0.013742	-0.820242
GARGALOVIC_RESPONSE_TO_OXIDIZED_PHOSPHOLIPIDS_GREY_UP	-0.52628	0.00464212	-3.7628	0.0010626	0.0139002	-0.834204
BIOCARTA_CD40_PATHWAY	-0.527523	0.0346357	-3.76226	0.001064	0.0139002	-0.835435
BIOCARTA_MAPK_PATHWAY	-0.268605	0.0187673	-3.75909	0.00107224	0.0139747	-0.842669
PID_EPHA2_FWD_PATHWAY	-0.367181	0.0278884	-3.75556	0.00108148	0.0140618	-0.850711
GARCIA_TARGETS_OF_FLI1_AND_DAX1_UP	-0.411285	0.0154436	-3.75404	0.00108548	0.0140805	-0.854165
CHARAFE_BREAST_CANCER_BASAL_VS_MESENCHYMAL_DN	-0.383014	0.0151969	-3.74856	0.00110004	0.0142359	-0.866659
REACTOME_PROCESSING_OF_CAPPED_INTRONLESS_PRE_MRNA	0.546943	0.00655752	3.74457	0.00111076	0.0143378	-0.875745
PODAR_RESPONSE_TO_ADAPHOSTIN_UP	-0.328609	-0.0135178	-3.74341	0.00111388	0.0143378	-0.878371
KEGG_TOLL_LIKE_RECEPTOR_SIGNALING_PATHWAY	-0.341635	0.0035008	-3.7425	0.00111634	0.0143378	-0.880437
BERTUCCI_INVASIVE_CARCINOMA_DUCTAL_VS_LOBULAR_DN	-0.336138	-0.00699086	-3.7417	0.00111853	0.0143378	-0.882273
BOYLAN_MULTIPLE_MYELOMA_C_DN	-0.250462	0.00759909	-3.74081	0.00112096	0.0143378	-0.884303
PID_NFKAPPAB_ATYPICAL_PATHWAY	-0.48089	0.0161881	-3.73821	0.00112806	0.0143952	-0.890219
VISALA_AGING_LYMPHOCYTE_UP	-0.483461	0.00477947	-3.72983	0.00115124	0.014657	-0.909276
SCHUETZ_BREAST_CANCER_DUCTAL_INVASIVE_UP	-0.368981	-0.00999427	-3.72852	0.00115491	0.0146698	-0.91226
BIOCARTA_CCR5_PATHWAY	-0.493895	0.00508108	-3.72458	0.00116603	0.0147769	-0.921233
MA_MYELOID_DIFFERENTIATION_DN	-0.337028	0.00766472	-3.72183	0.00117384	0.0148416	-0.927486
HAHTOLA_MYCOSIS_FUNGOIDES_DN	-0.42734	0.0108774	-3.71794	0.00118498	0.0149158	-0.936333
REACTOME_MYD88_CASCADE_INITIATED_ON_PLASMA_MEMBRANE	-0.292368	0.00856	-3.71789	0.00118513	0.0149158	-0.93645
SMID_BREAST_CANCER_LUMINAL_B_DN	-0.225493	-0.00338561	-3.71498	0.00119353	0.0149835	-0.943064
PID_LYMPH_ANGIOGENESIS_PATHWAY	-0.382953	0.00467977	-3.71414	0.00119595	0.0149835	-0.944967
EINAV_INTERFERON_SIGNATURE_IN_CANCER	-0.46252	-0.00356215	-3.71247	0.00120082	0.0149983	-0.948769
REACTOME_TRIF_TICAM1_MEDIATED_TLR4_SIGNALING	-0.282759	0.00250966	-3.71186	0.00120259	0.0149983	-0.950149
PID_UPA_UPAR_PATHWAY	-0.382151	-0.0163398	-3.70877	0.00121164	0.015077	-0.957169
REACTOME_REGULATION_OF_GENE_EXPRESSION_IN_LATE_STAGE_BRANCHING_MORPHOGENESIS_PANCREATIC_BUD_PRECURSOR_CELLS	-0.441765	0.00378036	-3.70491	0.00122304	0.0151845	-0.965939
HERNANDEZ_MITOTIC_ARREST_BY_DOCETAXEL_2_UP	-0.260517	-0.00163925	-3.69951	0.00123919	0.0153353	-0.978217
SASSON_RESPONSE_TO_GONADOTROPHINS_UP	-0.344324	0.0104996	-3.69898	0.00124077	0.0153353	-0.97941
REACTOME_EXTRACELLULAR_MATRIX_ORGANIZATION	-0.313314	-0.00326426	-3.69765	0.00124477	0.0153504	-0.982429
CLAUS_PGR_POSITIVE_MENINGIOMA_UP	-0.532138	0.00965322	-3.6957	0.00125068	0.0153887	-0.986862
REACTOME_TRAFFICKING_OF_MYRISTOYLATED_PROTEINS_TO_THE_CILIUM	-0.869935	0.0201469	-3.68935	0.0012701	0.0155927	-1.00128
JECHLINGER_EPITHELIAL_TO_MESENCHYMAL_TRANSITION_UP	-0.415148	0.00297137	-3.68729	0.00127646	0.0156359	-1.00596
KERLEY_RESPONSE_TO_CISPLATIN_UP	-0.445367	0.00847499	-3.68562	0.00128163	0.0156583	-1.00974
REACTOME_RNA_POLYMERASE_I_TRANSCRIPTION	0.417161	-0.00208256	3.68487	0.00128398	0.0156583	-1.01146
SMITH_TERT_TARGETS_DN	-0.310345	0.0105104	-3.68328	0.00128892	0.0156834	-1.01505
GAVIN_FOXP3_TARGETS_CLUSTER_P7	-0.314187	-0.00786679	-3.68236	0.0012918	0.0156834	-1.01714
REACTOME_MET_ACTIVATES_RAP1_AND_RAC1	-0.463457	0.0215534	-3.68121	0.00129542	0.0156834	-1.01976
BEIER_GLIOMA_STEM_CELL_DN	-0.322269	-0.00383485	-3.67972	0.00130011	0.0156834	-1.02314
GU_PDEF_TARGETS_UP	-0.359741	0.00904518	-3.67966	0.0013003	0.0156834	-1.02328
REACTOME_CASPASE_ACTIVATION_VIA_DEATH_RECEPTORS_IN_THE_PRESENCE_OF_LIGAND	-0.441812	-0.00952655	-3.67672	0.0013096	0.015742	-1.02995
REACTOME_METABOLISM_OF_NON_CODING_RNA	0.564924	0.0176874	3.67632	0.00131088	0.015742	-1.03086
XU_HGF_TARGETS_INDUCED_BY_AKT1_48HR_DN	0.561937	0.00927204	3.67312	0.00132108	0.0157752	-1.03812
COLIN_PILOCYTIC_ASTROCYTOMA_VS_GLIOBLASTOMA_UP	-0.450917	-0.00564518	-3.67289	0.0013218	0.0157752	-1.03863
REACTOME_SYNTHESIS_OF_DOLICHYL_PHOSPHATE	0.617435	-0.0347708	3.67259	0.00132276	0.0157752	-1.03931
REACTOME_NOTCH3_INTRACELLULAR_DOMAIN_REGULATES_TRANSCRIPTION	-0.430156	0.0149311	-3.67186	0.00132512	0.0157752	-1.04097
PASINI_SUZ12_TARGETS_DN	-0.261617	-0.00143037	-3.66737	0.00133962	0.0158865	-1.05116
DORN_ADENOVIRUS_INFECTION_12HR_DN	-0.328211	0.0151225	-3.66718	0.00134024	0.0158865	-1.05159
MORI_IMMATURE_B_LYMPHOCYTE_UP	-0.38912	-0.0124496	-3.66598	0.00134412	0.0158982	-1.0543
FLECHNER_BIOPSY_KIDNEY_TRANSPLANT_REJECTED_VS_OK_UP	-0.421184	-0.00854629	-3.66302	0.00135382	0.0159786	-1.06103
PID_FAK_PATHWAY	-0.427155	-0.0187439	-3.66176	0.00135796	0.0159893	-1.06388
CHIARADONNA_NEOPLASTIC_TRANSFORMATION_KRAS_DN	-0.352502	-0.00908099	-3.65984	0.00136428	0.0159893	-1.06822
ONDER_CDH1_SIGNALING_VIA_CTNNB1	-0.352528	-0.00244036	-3.6598	0.00136442	0.0159893	-1.06832
REACTOME_RNA_POLYMERASE_I_TRANSCRIPTION_TERMINATION	0.539913	-0.0132096	3.65921	0.00136636	0.0159893	-1.06965
TORCHIA_TARGETS_OF_EWSR1_FLI1_FUSION_UP	-0.229142	0.00733585	-3.65408	0.00138344	0.016144	-1.08127
NIKOLSKY_OVERCONNECTED_IN_BREAST_CANCER	-0.419577	0.00389397	-3.65243	0.00138898	0.016144	-1.08501
BILD_HRAS_ONCOGENIC_SIGNATURE	-0.29259	0.000969657	-3.65231	0.00138939	0.016144	-1.08529
BASSO_CD40_SIGNALING_DN	-0.265564	-0.00749294	-3.65174	0.00139132	0.016144	-1.08658
KEGG_PATHWAYS_IN_CANCER	-0.209981	0.00429639	-3.64917	0.0014	0.0162106	-1.0924
ACOSTA_PROLIFERATION_INDEPENDENT_MYC_TARGETS_DN	-0.234359	0.00757912	-3.64681	0.00140802	0.0162692	-1.09775
PID_P38_ALPHA_BETA_PATHWAY	-0.365224	0.00255472	-3.63882	0.00143552	0.0165521	-1.11583
GILMORE_CORE_NFKB_PATHWAY	-0.526806	0.00543489	-3.63539	0.00144751	0.0166555	-1.12361
BOWIE_RESPONSE_TO_TAMOXIFEN	-0.6159	0.0099067	-3.63386	0.00145288	0.0166824	-1.12708
DORN_ADENOVIRUS_INFECTION_24HR_UP	-0.498354	0.00704265	-3.62993	0.00146675	0.0168065	-1.13596
HELLER_SILENCED_BY_METHYLATION_UP	-0.269058	-0.0102698	-3.62733	0.001476	0.0168562	-1.14184
BIOCARTA_TNFR2_PATHWAY	-0.40393	0.0118941	-3.62699	0.00147722	0.0168562	-1.14261
PID_NEPHRIN_NEPH1_PATHWAY	-0.368599	0.00969508	-3.62598	0.00148085	0.0168627	-1.1449
INAMURA_LUNG_CANCER_SCC_DN	-0.46072	-0.0118622	-3.62461	0.00148574	0.0168834	-1.14799
VALK_AML_CLUSTER_5	-0.484522	0.0124777	-3.61881	0.00150675	0.0170868	-1.16111
PID_PDGFRA_PATHWAY	-0.42573	0.0126459	-3.6175	0.00151152	0.0170969	-1.16407
REACTOME_NUCLEAR_PORE_COMPLEX_NPC_DISASSEMBLY	0.538445	0.0156679	3.61635	0.00151574	0.0170969	-1.16668
FUKUSHIMA_TNFSF11_TARGETS	-0.452041	-0.0132221	-3.61602	0.00151696	0.0170969	-1.16743
REACTOME_INTERLEUKIN_6_SIGNALING	-0.592146	0.0187587	-3.61341	0.00152655	0.017154	-1.17331
REACTOME_SIGNALING_BY_NTRK1_TRKA	-0.312776	0.0119507	-3.61183	0.00153238	0.017154	-1.17688
REACTOME_NEGATIVE_REGULATION_OF_NMDA_RECEPTOR_MEDIATED_NEURONAL_TRANSMISSION	-0.362933	-0.00508407	-3.61162	0.00153318	0.017154	-1.17737
KEGG_RNA_DEGRADATION	0.401533	0.00312138	3.61126	0.0015345	0.017154	-1.17817
REACTOME_NUCLEAR_ENVELOPE_BREAKDOWN	0.47239	0.00610722	3.61042	0.00153765	0.0171543	-1.18009
SCHOEN_NFKB_SIGNALING	-0.371136	0.00587907	-3.60933	0.00154171	0.0171647	-1.18255
LIEN_BREAST_CARCINOMA_METAPLASTIC_VS_DUCTAL_UP	-0.316686	0.0187683	-3.60792	0.00154697	0.0171885	-1.18574
HOLLEMAN_ASPARAGINASE_RESISTANCE_B_ALL_DN	-0.514985	0.0286465	-3.60555	0.00155585	0.0172524	-1.19109
REACTOME_RNA_POLYMERASE_I_PROMOTER_ESCAPE	0.546474	-0.0103146	3.60402	0.00156159	0.0172812	-1.19453
REACTOME_MICRORNA_MIRNA_BIOGENESIS	0.488079	-0.00591984	3.59889	0.00158108	0.0174617	-1.20612
TONKS_TARGETS_OF_RUNX1_RUNX1T1_FUSION_HSC_UP	-0.270328	-0.0058722	-3.59788	0.00158497	0.0174696	-1.20841
REACTOME_TRAIL_SIGNALING	-0.491251	0.0219136	-3.59331	0.00160254	0.017628	-1.21872
LI_INDUCED_T_TO_NATURAL_KILLER_UP	-0.246572	-0.00206403	-3.59011	0.001615	0.0177295	-1.22595
RIGGI_EWING_SARCOMA_PROGENITOR_UP	-0.256284	-0.00317483	-3.58618	0.00163038	0.0178627	-1.23481
PID_KIT_PATHWAY	-0.423782	-0.00977021	-3.58393	0.00163928	0.0178935	-1.23989
REACTOME_RAF_INDEPENDENT_MAPK1_3_ACTIVATION	-0.54731	0.0229543	-3.58383	0.00163969	0.0178935	-1.24013
RUTELLA_RESPONSE_TO_CSF2RB_AND_IL4_UP	-0.239447	0.00216753	-3.58186	0.0016475	0.0179083	-1.24456
ROY_WOUND_BLOOD_VESSEL_UP	-0.358058	-0.0125798	-3.58184	0.00164756	0.0179083	-1.2446
PID_IL2_PI3K_PATHWAY	-0.416728	0.0154685	-3.57539	0.00167344	0.0181003	-1.25916
LINDSTEDT_DENDRITIC_CELL_MATURATION_C	-0.326626	-0.00935606	-3.57516	0.00167438	0.0181003	-1.25968
MULLIGHAN_MLL_SIGNATURE_2_DN	-0.210306	-0.000373256	-3.57457	0.00167677	0.0181003	-1.26101
TAVOR_CEBPA_TARGETS_DN	-0.301967	0.028567	-3.57387	0.00167958	0.0181003	-1.26258
PID_IL3_PATHWAY	-0.325701	0.00199741	-3.57335	0.00168168	0.0181003	-1.26374
ZHAN_MULTIPLE_MYELOMA_LB_UP	-0.298781	0.00719432	-3.57228	0.00168604	0.0181118	-1.26616
REACTOME_INTERFERON_ALPHA_BETA_SIGNALING	-0.367491	-0.00791715	-3.57076	0.00169223	0.0181429	-1.26959
BIOCARTA_HDAC_PATHWAY	-0.386032	0.00348246	-3.56847	0.00170164	0.0182082	-1.27477
BASSO_HAIRY_CELL_LEUKEMIA_UP	-0.365942	-0.00787471	-3.56501	0.00171589	0.018325	-1.28255
JIANG_HYPOXIA_NORMAL	-0.314732	0.00209912	-3.56008	0.00173641	0.0184968	-1.29365
WONG_ENDMETRIUM_CANCER_DN	-0.429955	-0.00858649	-3.55954	0.0017387	0.0184968	-1.29488
MEISSNER_NPC_HCP_WITH_H3K4ME2_AND_H3K27ME3	-0.233708	0.00852687	-3.55802	0.00174508	0.0185197	-1.2983
NIKOLSKY_BREAST_CANCER_7P15_AMPLICON	0.581642	-0.00485968	3.55742	0.00174759	0.0185197	-1.29964
GHANDHI_BYSTANDER_IRRADIATION_UP	-0.470356	0.0106464	-3.55655	0.00175127	0.0185231	-1.30161
WATANABE_ULCERATIVE_COLITIS_WITH_CANCER_DN	-0.441243	-0.0277472	-3.55372	0.00176328	0.0186142	-1.30798
TSAI_DNAJB4_TARGETS_UP	-0.539317	-0.0293496	-3.55145	0.00177295	0.0186507	-1.31309
REACTOME_G_PROTEIN_MEDIATED_EVENTS	-0.24827	-0.00759711	-3.55132	0.00177352	0.0186507	-1.31339
KEGG_CALCIUM_SIGNALING_PATHWAY	-0.230091	0.00912622	-3.54908	0.00178311	0.0186911	-1.31843
WANG_TNF_TARGETS	-0.433548	-0.00521444	-3.54884	0.00178415	0.0186911	-1.31897
DUAN_PRDM5_TARGETS	-0.274925	0.00494025	-3.54767	0.00178917	0.0187081	-1.32159
FLOTHO_PEDIATRIC_ALL_THERAPY_RESPONSE_DN	-0.366156	0.00631302	-3.54668	0.00179348	0.0187175	-1.32384
NAKAMURA_TUMOR_ZONE_PERIPHERAL_VS_CENTRAL_DN	-0.330742	-0.0044698	-3.54462	0.0018024	0.0187412	-1.32847
AMIT_SERUM_RESPONSE_40_MCF10A	-0.472978	-0.000978456	-3.54458	0.00180256	0.0187412	-1.32856
LINDGREN_BLADDER_CANCER_CLUSTER_2B	-0.273668	-0.00546779	-3.54238	0.00181217	0.0188055	-1.33352
PID_THROMBIN_PAR1_PATHWAY	-0.426701	0.00603265	-3.53928	0.00182575	0.0188449	-1.34048
GARGALOVIC_RESPONSE_TO_OXIDIZED_PHOSPHOLIPIDS_BLACK_UP	-0.444838	0.000689159	-3.53902	0.00182687	0.0188449	-1.34106
PID_EPHRINB_REV_PATHWAY	-0.312454	-0.00664689	-3.53847	0.00182932	0.0188449	-1.34231
PID_GMCSF_PATHWAY	-0.326487	-0.00955111	-3.53785	0.00183205	0.0188449	-1.3437
REACTOME_RUNX3_REGULATES_NOTCH_SIGNALING	-0.58019	0.0083998	-3.53761	0.00183309	0.0188449	-1.34423
REACTOME_REDUCTION_OF_CYTOSOLIC_CAPLUSPLUS_LEVELS	-0.499553	0.0172339	-3.53619	0.00183941	0.0188536	-1.34744
ONO_AML1_TARGETS_DN	-0.409678	-0.00611341	-3.53587	0.0018408	0.0188536	-1.34815
REACTOME_MITOTIC_PROPHASE	0.411685	0.00500647	3.53384	0.00184985	0.0189106	-1.35272
HOFFMANN_LARGE_TO_SMALL_PRE_BII_LYMPHOCYTE_DN	-0.26898	0.00704701	-3.53308	0.00185324	0.0189106	-1.35443
XU_HGF_SIGNALING_NOT_VIA_AKT1_6HR	-0.459642	0.0415517	-3.53126	0.00186136	0.0189583	-1.35851
SCHAEFFER_PROSTATE_DEVELOPMENT_AND_CANCER_BOX4_UP	-0.551993	-0.00325098	-3.52402	0.00189413	0.0191935	-1.3748
MULLIGAN_NTF3_SIGNALING_VIA_INSR_AND_IGF1R_DN	-0.508516	-0.00418185	-3.52354	0.00189633	0.0191935	-1.37587
REACTOME_BINDING_OF_TCF_LEF:CTNNB1_TO_TARGET_GENE_PROMOTERS	-0.552717	0.0218665	-3.52287	0.00189939	0.0191935	-1.37738
REACTOME_REELIN_SIGNALLING_PATHWAY	-0.662535	-0.0317087	-3.52261	0.00190058	0.0191935	-1.37796
REACTOME_GENE_SILENCING_BY_RNA	0.424404	0.00218799	3.52218	0.00190254	0.0191935	-1.37892
LA_MEN1_TARGETS	-0.483477	0.00719958	-3.52156	0.00190539	0.0191935	-1.38032
BAELDE_DIABETIC_NEPHROPATHY_DN	-0.251814	-0.0124663	-3.5184	0.00191992	0.0193045	-1.38741
DORN_ADENOVIRUS_INFECTION_48HR_DN	-0.330728	0.00713583	-3.51754	0.00192391	0.0193093	-1.38934
MEISSNER_BRAIN_HCP_WITH_H3K27ME3	-0.234252	0.010584	-3.50572	0.00197943	0.0198304	-1.41588
BIOCARTA_PARKIN_PATHWAY	-0.349636	0.00991679	-3.50464	0.0019846	0.0198331	-1.41831
SEMBA_FHIT_TARGETS_DN	0.754542	0.03117	3.50415	0.00198692	0.0198331	-1.4194
ZHANG_RESPONSE_TO_CANTHARIDIN_DN	0.482595	0.0114073	3.50301	0.0019924	0.019841	-1.42197
FIGUEROA_AML_METHYLATION_CLUSTER_5_UP	-0.402819	0.0127603	-3.50248	0.00199493	0.019841	-1.42315
REACTOME_NEUTROPHIL_DEGRANULATION	-0.2142	-0.00231547	-3.49872	0.00201306	0.0199853	-1.43159
CHARAFE_BREAST_CANCER_LUMINAL_VS_BASAL_DN	-0.236227	0.00260413	-3.48968	0.00205729	0.0203876	-1.45185
REACTOME_BUTYROPHILIN_BTN_FAMILY_INTERACTIONS	-0.328324	-0.00197545	-3.48822	0.00206452	0.0204178	-1.45512
FAELT_B_CLL_WITH_VH_REARRANGEMENTS_UP	-0.268164	0.00415171	-3.48757	0.00206777	0.0204178	-1.45659
SANCHEZ_MDM2_TARGETS	-0.477678	-0.0192321	-3.48484	0.00208139	0.0205155	-1.46271
PID_S1P_S1P2_PATHWAY	-0.406077	0.00902947	-3.48365	0.00208736	0.0205375	-1.46538
EPPERT_LSC_R	-0.344553	-0.0222104	-3.48166	0.00209734	0.0205714	-1.46982
RAY_TARGETS_OF_P210_BCR_ABL_FUSION_UP	-0.514492	0.00127419	-3.48148	0.00209828	0.0205714	-1.47024
LE_NEURONAL_DIFFERENTIATION_DN	0.551881	0.0248568	3.47891	0.00211124	0.0206616	-1.47598
WIERENGA_STAT5A_TARGETS_GROUP1	-0.275558	0.00459258	-3.47536	0.00212935	0.0208018	-1.48394
CHIBA_RESPONSE_TO_TSA_DN	-0.357605	0.0145879	-3.46901	0.00216211	0.0210844	-1.49817
LEE_LIVER_CANCER_DENA_UP	-0.294971	0.00234119	-3.46677	0.00217373	0.0211602	-1.50316
BRUINS_UVC_RESPONSE_VIA_TP53_GROUP_D	-0.218583	0.0028267	-3.46298	0.00219362	0.021316	-1.51165
HE_PTEN_TARGETS_DN	-0.591769	0.0111578	-3.46003	0.00220922	0.0214299	-1.51825
NUYTTEN_EZH2_TARGETS_UP	-0.255138	0.00136888	-3.45888	0.00221533	0.0214512	-1.52082
GERY_CEBP_TARGETS	-0.248736	-0.00350305	-3.45734	0.00222354	0.0214929	-1.52427
REACTOME_APOPTOTIC_CLEAVAGE_OF_CELLULAR_PROTEINS	-0.256635	0.000184985	-3.45583	0.00223158	0.0215328	-1.52763
BIOCARTA_INFLAM_PATHWAY	-0.416293	-0.0197908	-3.45338	0.00224478	0.0216159	-1.53312
SMIRNOV_RESPONSE_TO_IR_2HR_UP	-0.34636	0.0197109	-3.45277	0.00224806	0.0216159	-1.53448
MARSHALL_VIRAL_INFECTION_RESPONSE_UP	-0.590427	0.0397388	-3.45175	0.00225357	0.0216311	-1.53676
INGA_TP53_TARGETS	-0.477713	0.0373171	-3.44977	0.00226431	0.0216828	-1.54119
REACTOME_CROSS_PRESENTATION_OF_PARTICULATE_EXOGENOUS_ANTIGENS_PHAGOSOMES	-0.665372	0.015555	-3.4486	0.00227065	0.0216828	-1.54379
REACTOME_RHO_GTPASES_ACTIVATE_WASPS_AND_WAVES	-0.387685	0.0223875	-3.44858	0.00227078	0.0216828	-1.54385
CHEN_ETV5_TARGETS_SERTOLI	-0.388221	0.00450692	-3.44414	0.00229508	0.0218768	-1.55376
PID_AR_NONGENOMIC_PATHWAY	-0.335218	0.0112622	-3.44211	0.0023063	0.0219458	-1.5583
HUMMEL_BURKITTS_LYMPHOMA_DN	-0.404884	-0.0289559	-3.43637	0.00233828	0.0222116	-1.57112
REACTOME_TRANSPORT_OF_MATURE_MRNAS_DERIVED_FROM_INTRONLESS_TRANSCRIPTS	0.498678	0.00948817	3.43405	0.00235129	0.0222589	-1.57629
GRUETZMANN_PANCREATIC_CANCER_DN	-0.224391	-0.00920444	-3.43404	0.00235135	0.0222589	-1.57631
REACTOME_INNATE_IMMUNE_SYSTEM	-0.195699	-0.00143185	-3.43286	0.002358	0.0222835	-1.57894
CLASPER_LYMPHATIC_VESSELS_DURING_METASTASIS_DN	-0.345666	-0.00844658	-3.42985	0.00237507	0.0224063	-1.58566
CASORELLI_APL_SECONDARY_VS_DE_NOVO_UP	-0.314268	-0.0036533	-3.42565	0.00239913	0.0225445	-1.59504
AMIT_DELAYED_EARLY_GENES	-0.34913	0.00637582	-3.42556	0.00239966	0.0225445	-1.59524
LUCAS_HNF4A_TARGETS_UP	-0.25505	0.00764544	-3.42515	0.00240202	0.0225445	-1.59616
REACTOME_DEADENYLATION_DEPENDENT_MRNA_DECAY	0.365129	-0.00587911	3.42293	0.00241481	0.0226239	-1.6011
REACTOME_GLUTAMATE_AND_GLUTAMINE_METABOLISM	-0.307355	0.00115511	-3.42226	0.0024187	0.0226239	-1.6026
DAZARD_UV_RESPONSE_CLUSTER_G28	-0.519145	-0.00573187	-3.42085	0.0024269	0.0226325	-1.60575
RAMJAUN_APOPTOSIS_BY_TGFB1_VIA_SMAD4_UP	-0.471629	-0.000358001	-3.42016	0.0024309	0.0226325	-1.60728
CROONQUIST_STROMAL_STIMULATION_DN	-0.517067	0.000995389	-3.41998	0.00243196	0.0226325	-1.60769
REACTOME_INTERACTIONS_OF_VPR_WITH_HOST_CELLULAR_PROTEINS	0.511342	0.0103811	3.41637	0.00245309	0.0227869	-1.61574
LEE_INTRATHYMIC_T_PROGENITOR	-0.335484	-0.00642401	-3.41573	0.00245684	0.0227869	-1.61716
OISHI_CHOLANGIOMA_STEM_CELL_LIKE_DN	-0.222858	-0.000343469	-3.40823	0.00250133	0.0231335	-1.63386
PID_S1P_META_PATHWAY	-0.427696	-0.00442927	-3.40802	0.00250262	0.0231335	-1.63434
BIOCARTA_P27_PATHWAY	0.527822	-0.00256964	3.40203	0.00253874	0.0234279	-1.64767
REACTOME_ERYTHROPOIETIN_ACTIVATES_PHOSPHOLIPASE_C_GAMMA_PLCG	-0.612323	0.00885633	-3.40116	0.00254402	0.0234353	-1.6496
FEVR_CTNNB1_TARGETS_UP	-0.235186	-0.000197473	-3.39999	0.00255116	0.0234353	-1.65221
REACTOME_RUNX1_REGULATES_TRANSCRIPTION_OF_GENES_INVOLVED_IN_DIFFERENTIATION_OF_MYELOID_CELLS	-0.522492	-0.00323019	-3.39913	0.00255641	0.0234353	-1.65412
SIG_BCR_SIGNALING_PATHWAY	-0.411859	-0.0136539	-3.3991	0.00255658	0.0234353	-1.65418
MANALO_HYPOXIA_DN	0.544635	0.0104353	3.39771	0.00256511	0.0234744	-1.65728
BOQUEST_STEM_CELL_CULTURED_VS_FRESH_UP	-0.242923	-0.00729213	-3.39701	0.00256942	0.0234748	-1.65884
GESERICK_TERT_TARGETS_DN	-0.464161	0.0314176	-3.39411	0.00258733	0.0235992	-1.6653
SHAFFER_IRF4_MULTIPLE_MYELOMA_PROGRAM	-0.351332	0.0110798	-3.39284	0.00259517	0.0236315	-1.66812
BIOCARTA_IL2RB_PATHWAY	-0.335957	-0.0136215	-3.39102	0.0026065	0.0236881	-1.67217
REACTOME_FREE_FATTY_ACIDS_REGULATE_INSULIN_SECRETION	-0.445424	0.0130773	-3.39046	0.00260999	0.0236881	-1.67341
DELYS_THYROID_CANCER_UP	-0.247177	0.00120607	-3.38864	0.00262138	0.023712	-1.67746
NABA_BASEMENT_MEMBRANES	-0.368354	0.0198918	-3.38784	0.00262641	0.023712	-1.67925
REACTOME_ESTROGEN_BIOSYNTHESIS	-0.689038	0.0514325	-3.38737	0.00262938	0.023712	-1.6803
PID_IL8_CXCR2_PATHWAY	-0.417559	-0.0147359	-3.38695	0.00263201	0.023712	-1.68122
OSWALD_HEMATOPOIETIC_STEM_CELL_IN_COLLAGEN_GEL_UP	-0.216392	0.00833784	-3.3866	0.00263419	0.023712	-1.682
MAINA_HYPOXIA_VHL_TARGETS_UP	-0.639756	0.0417313	-3.38498	0.00264442	0.0237649	-1.6856
ENK_UV_RESPONSE_EPIDERMIS_DN	-0.24232	0.000399207	-3.3843	0.0026487	0.0237649	-1.6871
GAVIN_FOXP3_TARGETS_CLUSTER_P4	-0.246181	0.00731204	-3.38077	0.00267116	0.0238915	-1.69495
RUTELLA_RESPONSE_TO_HGF_UP	-0.253753	0.0023573	-3.379	0.00268252	0.0238915	-1.6989
TENEDINI_MEGAKARYOCYTE_MARKERS	-0.330622	8.30635e-05	-3.37878	0.00268392	0.0238915	-1.69938
MARKEY_RB1_CHRONIC_LOF_DN	-0.309707	0.0108178	-3.37876	0.00268406	0.0238915	-1.69943
SERVITJA_ISLET_HNF1A_TARGETS_DN	-0.261661	0.0205527	-3.37868	0.00268453	0.0238915	-1.6996
BENPORATH_SUZ12_TARGETS	-0.17306	0.00731905	-3.3731	0.00272056	0.0241729	-1.71199
WILLIAMS_ESR1_TARGETS_UP	0.317664	0.00153633	3.37197	0.00272791	0.0241992	-1.7145
REICHERT_MITOSIS_LIN9_TARGETS	0.668968	0.0246126	3.36857	0.0027502	0.0243577	-1.72206
BIOCARTA_MET_PATHWAY	-0.381803	0.012502	-3.36503	0.00277351	0.0244867	-1.72991
BIOCARTA_PRION_PATHWAY	-0.464432	0.0209106	-3.36489	0.00277448	0.0244867	-1.73023
REACTOME_CRISTAE_FORMATION	0.369203	0.0024255	3.36434	0.00277813	0.0244867	-1.73145
KEGG_GLIOMA	-0.307008	0.00495279	-3.35966	0.00280933	0.0245039	-1.74183
REACTOME_TRANSCRIPTIONAL_REGULATION_BY_SMALL_RNAS	0.480425	0.0101613	3.35902	0.00281365	0.0245039	-1.74326
KEGG_HEMATOPOIETIC_CELL_LINEAGE	-0.265605	-0.00580505	-3.35865	0.00281608	0.0245039	-1.74406
SWEET_LUNG_CANCER_KRAS_DN	-0.255153	-0.00599307	-3.35854	0.00281686	0.0245039	-1.74432
HOLLERN_EMT_BREAST_TUMOR_DN	-0.216748	0.00315992	-3.35823	0.00281894	0.0245039	-1.745
NAKAYAMA_SOFT_TISSUE_TUMORS_PCA1_UP	-0.445077	0.0125484	-3.35792	0.00282103	0.0245039	-1.74569
PID_HIF1_TFPATHWAY	-0.379103	0.0114502	-3.35763	0.00282296	0.0245039	-1.74633
GOLDRATH_IMMUNE_MEMORY	-0.234086	-4.69733e-05	-3.35736	0.00282476	0.0245039	-1.74692
REACTOME_TRANSPORT_OF_ORGANIC_ANIONS	-0.424384	0.01145	-3.35667	0.00282947	0.0245039	-1.74847
REACTOME_INFLAMMASOMES	-0.446834	0.0151625	-3.35586	0.00283491	0.0245039	-1.75025
PID_ER_NONGENOMIC_PATHWAY	-0.363054	0.00727087	-3.35563	0.00283649	0.0245039	-1.75077
KOBAYASHI_EGFR_SIGNALING_6HR_DN	-0.527566	0.0280588	-3.35489	0.00284151	0.0245039	-1.75241
KUMAMOTO_RESPONSE_TO_NUTLIN_3A_DN	0.776772	0.060465	3.35467	0.002843	0.0245039	-1.7529
SU_TESTIS	0.361269	0.00267658	3.35445	0.00284449	0.0245039	-1.75338
WANG_MLL_TARGETS	-0.266465	-0.00494765	-3.35399	0.00284763	0.0245039	-1.75441
SOUCEK_MYC_TARGETS	-0.548537	0.0069038	-3.35322	0.00285285	0.0245039	-1.75611
BENPORATH_PRC2_TARGETS	-0.188603	0.00690349	-3.35278	0.00285582	0.0245039	-1.75708
PID_ERBB1_DOWNSTREAM_PATHWAY	-0.28619	0.0157175	-3.35152	0.00286441	0.0245393	-1.75987
SCHUHMACHER_MYC_TARGETS_UP	0.474768	0.00820452	3.34691	0.0028961	0.0247722	-1.77009
ULE_SPLICING_VIA_NOVA2	-0.229744	-0.00218785	-3.34438	0.00291366	0.0248837	-1.7757
CHEN_LVAD_SUPPORT_OF_FAILING_HEART_UP	-0.290379	0.00380736	-3.34336	0.00292075	0.0249056	-1.77796
HATADA_METHYLATED_IN_LUNG_CANCER_UP	-0.199107	-5.77975e-05	-3.33529	0.00297749	0.0253501	-1.79583
KEGG_MAPK_SIGNALING_PATHWAY	-0.243536	0.00447245	-3.33305	0.00299343	0.0254464	-1.80079
PID_LPA4_PATHWAY	-0.431742	-0.00862837	-3.33195	0.00300128	0.0254738	-1.80322
KEGG_CYTOKINE_CYTOKINE_RECEPTOR_INTERACTION	-0.225071	-0.0118741	-3.3299	0.00301601	0.0255594	-1.80776
SARRIO_EPITHELIAL_MESENCHYMAL_TRANSITION_DN	-0.32824	-0.00618514	-3.32904	0.00302213	0.0255719	-1.80965
GUTIERREZ_CHRONIC_LYMPHOCYTIC_LEUKEMIA_UP	-0.421868	-0.00193099	-3.3274	0.00303402	0.0256305	-1.81329
WHITFIELD_CELL_CYCLE_G2_M	0.417712	0.00996366	3.32629	0.00304203	0.0256305	-1.81574
SHIN_B_CELL_LYMPHOMA_CLUSTER_2	-0.342992	0.0113977	-3.32615	0.00304304	0.0256305	-1.81605
NOJIMA_SFRP2_TARGETS_DN	-0.320974	0.00634437	-3.32466	0.00305385	0.0256822	-1.81934
REACTOME_RNA_POLYMERASE_III_TRANSCRIPTION_TERMINATION	0.47168	-0.00449016	3.3234	0.00306307	0.0256823	-1.82214
UROSEVIC_RESPONSE_TO_IMIQUIMOD	-0.519951	-0.00838897	-3.32338	0.0030632	0.0256823	-1.82218
STEIN_ESRRA_TARGETS_DN	-0.192575	0.0132688	-3.32225	0.00307146	0.0257124	-1.82468
REACTOME_DISEASES_ASSOCIATED_WITH_N_GLYCOSYLATION_OF_PROTEINS	0.513518	-0.018747	3.32043	0.0030848	0.0257848	-1.8287
LINDGREN_BLADDER_CANCER_HIGH_RECURRENCE	-0.367561	-0.00369276	-3.31967	0.0030904	0.0257878	-1.83038
REACTOME_ERYTHROPOIETIN_ACTIVATES_PHOSPHOINOSITIDE_3_KINASE_PI3K	-0.508094	-0.000424579	-3.31911	0.00309453	0.0257878	-1.83162
WIEDERSCHAIN_TARGETS_OF_BMI1_AND_PCGF2	-0.260727	-0.0015609	-3.31844	0.00309941	0.0257894	-1.83309
FINETTI_BREAST_CANCER_KINOME_RED	0.78277	0.0291975	3.31723	0.00310842	0.0258252	-1.83578
PID_IL4_2PATHWAY	-0.289383	0.0192457	-3.31635	0.00311491	0.0258402	-1.83772
JONES_TCOF1_TARGETS	-0.783235	0.0137785	-3.31494	0.00312537	0.0258878	-1.84082
PID_PI3K_PLC_TRK_PATHWAY	-0.391961	-0.000175712	-3.31414	0.00313137	0.0258985	-1.84261
MIKKELSEN_NPC_HCP_WITH_H3K27ME3	-0.199162	0.00632987	-3.3131	0.0031391	0.0259235	-1.84489
REACTOME_SIGNALLING_TO_ERKS	-0.381151	0.0276261	-3.30889	0.00317067	0.026145	-1.85418
HARRIS_HYPOXIA	-0.409634	0.012296	-3.30805	0.00317704	0.0261582	-1.85604
SIG_PIP3_SIGNALING_IN_B_LYMPHOCYTES	-0.374153	0.00407343	-3.30741	0.00318185	0.0261587	-1.85745
PID_TCR_CALCIUM_PATHWAY	-0.439985	0.0257293	-3.30667	0.00318752	0.0261662	-1.8591
ZWANG_CLASS_3_TRANSIENTLY_INDUCED_BY_EGF	-0.245897	0.0152785	-3.3059	0.00319337	0.0261752	-1.8608
BIOCARTA_CTCF_PATHWAY	-0.270566	0.0176057	-3.30446	0.00320429	0.0262163	-1.86397
BONCI_TARGETS_OF_MIR15A_AND_MIR16_1	-0.252605	0.00523977	-3.30399	0.00320792	0.0262163	-1.86502
BURTON_ADIPOGENESIS_PEAK_AT_24HR	0.572056	0.034862	3.30139	0.00322775	0.0263055	-1.87073
AGUIRRE_PANCREATIC_CANCER_COPY_NUMBER_UP	0.215425	-0.00504125	3.30131	0.0032284	0.0263055	-1.87092
TERAO_AOX4_TARGETS_HG_DN	-0.620914	0.0373332	-3.29696	0.00326201	0.0265052	-1.88053
MULLIGHAN_MLL_SIGNATURE_1_DN	-0.185153	-0.00495637	-3.29689	0.00326255	0.0265052	-1.88068
PID_WNT_NONCANONICAL_PATHWAY	-0.344885	-0.017936	-3.2925	0.00329677	0.0267313	-1.89036
MEISSNER_NPC_HCP_WITH_H3_UNMETHYLATED	-0.185633	0.0104687	-3.29207	0.00330009	0.0267313	-1.89129
FOURNIER_ACINAR_DEVELOPMENT_LATE_DN	0.618508	0.0165614	3.28723	0.00333833	0.0270012	-1.90198
RODRIGUES_DCC_TARGETS_DN	-0.280488	-0.00557771	-3.2857	0.00335044	0.0270593	-1.90533
HADDAD_T_LYMPHOCYTE_AND_NK_PROGENITOR_UP	-0.233444	0.00862874	-3.28097	0.0033883	0.027254	-1.91575
IGLESIAS_E2F_TARGETS_UP	-0.24565	-0.0109864	-3.28079	0.0033898	0.027254	-1.91616
KLEIN_PRIMARY_EFFUSION_LYMPHOMA_DN	-0.300285	0.00327474	-3.2796	0.00339939	0.027254	-1.91878
BIOCARTA_GH_PATHWAY	-0.410155	-0.012064	-3.27959	0.00339944	0.027254	-1.91879
BOQUEST_STEM_CELL_CULTURED_VS_FRESH_DN	-0.368626	-0.0114624	-3.27921	0.00340253	0.027254	-1.91964
PID_INTEGRIN2_PATHWAY	-0.329826	0.0131561	-3.27899	0.00340427	0.027254	-1.92011
OSWALD_HEMATOPOIETIC_STEM_CELL_IN_COLLAGEN_GEL_DN	-0.198415	0.000861325	-3.27562	0.00343167	0.0274334	-1.92754
GROSS_HYPOXIA_VIA_ELK3_AND_HIF1A_UP	-0.252866	0.016766	-3.27233	0.00345859	0.0276085	-1.93479
REACTOME_RNA_POLYMERASE_I_TRANSCRIPTION_INITIATION	0.390107	-0.00133308	3.26918	0.00348449	0.0277061	-1.9417
REACTOME_SUMOYLATION_OF_DNA_REPLICATION_PROTEINS	0.513006	0.0191679	3.26909	0.00348527	0.0277061	-1.94191
AMIT_EGF_RESPONSE_240_MCF10A	-0.342762	-0.0113406	-3.26901	0.00348593	0.0277061	-1.94209
PID_RAS_PATHWAY	-0.346976	0.0159422	-3.26603	0.00351068	0.0278626	-1.94864
NAGY_PCAF_COMPONENTS_HUMAN	0.475905	-0.00581796	3.26517	0.0035178	0.0278788	-1.95052
LEE_BMP2_TARGETS_UP	-0.306353	-0.00821894	-3.26163	0.00354748	0.0280736	-1.9583
REACTOME_MYOGENESIS	-0.284973	0.0106093	-3.2596	0.00356463	0.0281536	-1.96277
GARGALOVIC_RESPONSE_TO_OXIDIZED_PHOSPHOLIPIDS_RED_DN	-0.421879	-0.00780012	-3.25922	0.00356783	0.0281536	-1.9636
GARGALOVIC_RESPONSE_TO_OXIDIZED_PHOSPHOLIPIDS_TURQUOISE_UP	-0.339869	-0.00101459	-3.25836	0.00357514	0.0281708	-1.9655
PHONG_TNF_RESPONSE_VIA_P38_COMPLETE	-0.21759	0.00859681	-3.25771	0.00358061	0.0281736	-1.96692
REACTOME_PLATELET_ACTIVATION_SIGNALING_AND_AGGREGATION	-0.228618	-0.00535682	-3.25663	0.0035898	0.0282056	-1.96929
KEGG_PRION_DISEASES	-0.317762	-0.00405474	-3.25602	0.00359499	0.028206	-1.97063
BASAKI_YBX1_TARGETS_DN	-0.232484	-0.00141921	-3.25126	0.0036358	0.028453	-1.98109
REACTOME_VIRAL_MESSENGER_RNA_SYNTHESIS	0.474493	0.00762915	3.25035	0.00364367	0.028453	-1.98309
RICKMAN_METASTASIS_DN	-0.238074	0.00428792	-3.25021	0.00364488	0.028453	-1.9834
TURASHVILI_BREAST_LOBULAR_CARCINOMA_VS_DUCTAL_NORMAL_UP	-0.339368	-0.0115339	-3.24994	0.00364716	0.028453	-1.98398
FONTAINE_PAPILLARY_THYROID_CARCINOMA_UP	-0.296148	0.00429014	-3.24922	0.0036534	0.0284613	-1.98556
BIOCARTA_IL22BP_PATHWAY	-0.601776	0.00864443	-3.24684	0.00367412	0.0284658	-1.9908
PEREZ_TP63_TARGETS	-0.248804	-0.00124745	-3.24644	0.00367762	0.0284658	-1.99168
BIOCARTA_ATRBRCA_PATHWAY	0.482494	0.0124891	3.24584	0.00368278	0.0284658	-1.99298
SMID_BREAST_CANCER_NORMAL_LIKE_DN	0.595191	-0.0351826	3.24541	0.00368653	0.0284658	-1.99392
BIOCARTA_FCER1_PATHWAY	-0.34381	-0.0133679	-3.24463	0.00369337	0.0284658	-1.99564
REACTOME_INTEGRIN_CELL_SURFACE_INTERACTIONS	-0.337063	-0.00358711	-3.24439	0.00369548	0.0284658	-1.99617
STEARMAN_TUMOR_FIELD_EFFECT_UP	-0.353169	-0.0154314	-3.24419	0.00369722	0.0284658	-1.9966
SMID_BREAST_CANCER_LUMINAL_A_DN	0.612881	0.00330712	3.24382	0.00370047	0.0284658	-1.99742
REACTOME_DEGRADATION_OF_THE_EXTRACELLULAR_MATRIX	-0.305906	-0.00913065	-3.24381	0.00370055	0.0284658	-1.99744
REACTOME_MITOCHONDRIAL_PROTEIN_IMPORT	0.414927	0.0309176	3.24275	0.00370985	0.0284924	-1.99976
YAO_TEMPORAL_RESPONSE_TO_PROGESTERONE_CLUSTER_6	-0.343444	-0.00743505	-3.24224	0.00371438	0.0284924	-2.00089
REACTOME_SODIUM_PROTON_EXCHANGERS	-0.569997	-0.00431266	-3.23905	0.0037425	0.0286681	-2.00787
MENSE_HYPOXIA_UP	-0.504876	0.0219708	-3.23573	0.00377207	0.0288271	-2.01516
REACTOME_TRANSPORT_AND_SYNTHESIS_OF_PAPS	-0.602217	0.0265284	-3.23475	0.00378084	0.0288271	-2.01731
REACTOME_RAP1_SIGNALLING	-0.288123	-0.00701796	-3.23406	0.00378704	0.0288271	-2.01883
ZHAN_MULTIPLE_MYELOMA_LB_DN	-0.374434	-0.00966112	-3.23329	0.00379395	0.0288271	-2.02052
ZEILSTRA_CD44_TARGETS_UP	-0.529399	0.0127311	-3.23323	0.00379447	0.0288271	-2.02064
BERENJENO_TRANSFORMED_BY_RHOA_FOREVER_UP	-0.390269	-0.0211496	-3.2329	0.00379747	0.0288271	-2.02138
SCHAEFFER_PROSTATE_DEVELOPMENT_48HR_DN	-0.237291	-0.00220422	-3.23262	0.00379994	0.0288271	-2.02198
BIOCARTA_ERYTH_PATHWAY	-0.449559	-0.0100188	-3.23086	0.0038158	0.0288756	-2.02584
MEINHOLD_OVARIAN_CANCER_LOW_GRADE_DN	0.426698	0.0102727	3.23075	0.00381683	0.0288756	-2.02608
WU_HBX_TARGETS_1_DN	-0.378056	0.0143259	-3.22799	0.00384184	0.0290249	-2.03213
REACTOME_BUTYRATE_RESPONSE_FACTOR_1_BRF1_BINDS_AND_DESTABILIZES_MRNA	0.37749	0.0114848	3.22615	0.00385863	0.0291117	-2.03617
REACTOME_SIGNALING_BY_WNT_IN_CANCER	-0.3716	0.00151325	-3.22497	0.00386934	0.0291283	-2.03873
WINTER_HYPOXIA_DN	-0.342037	-0.0165382	-3.22475	0.00387142	0.0291283	-2.03923
JU_AGING_TERC_TARGETS_UP	-0.470138	0.0368748	-3.22231	0.00389385	0.0292571	-2.04458
RAMALHO_STEMNESS_DN	-0.353304	0.0101084	-3.22078	0.00390795	0.029323	-2.04792
ZHU_SKIL_TARGETS_UP	-0.418651	-0.00370183	-3.21981	0.00391687	0.0293499	-2.05003
PID_VEGFR1_2_PATHWAY	-0.34084	0.00561651	-3.21839	0.00393008	0.0293975	-2.05315
KRIGE_AMINO_ACID_DEPRIVATION	-0.480886	-0.0432912	-3.21798	0.00393392	0.0293975	-2.05405
RAFFEL_VEGFA_TARGETS_UP	-0.521766	-0.0133391	-3.21551	0.00395695	0.0295295	-2.05945
CHANGOLKAR_H2AFY_TARGETS_UP	-0.298284	0.000206885	-3.21397	0.00397133	0.0295453	-2.06281
VISALA_AGING_LYMPHOCYTE_DN	-0.451206	-0.00653922	-3.21381	0.00397287	0.0295453	-2.06317
REACTOME_EXPORT_OF_VIRAL_RIBONUCLEOPROTEINS_FROM_NUCLEUS	0.510851	0.0177129	3.21356	0.00397518	0.0295453	-2.0637
ZHANG_INTERFERON_RESPONSE	-0.47876	-0.018819	-3.21152	0.00399445	0.02963	-2.06818
BAFNA_MUC4_TARGETS_DN	-0.479368	0.0137377	-3.21121	0.00399736	0.02963	-2.06885
YEMELYANOV_GR_TARGETS_DN	-0.37949	0.0336347	-3.21055	0.00400364	0.0296366	-2.0703
DORN_ADENOVIRUS_INFECTION_32HR_DN	-0.318721	0.00873651	-3.20687	0.0040386	0.0298077	-2.07835
FARMER_BREAST_CANCER_CLUSTER_2	0.691718	0.0227399	3.20666	0.00404061	0.0298077	-2.07881
ICHIBA_GRAFT_VERSUS_HOST_DISEASE_35D_UP	-0.342892	0.0101549	-3.20641	0.004043	0.0298077	-2.07936
DAVICIONI_TARGETS_OF_PAX_FOXO1_FUSIONS_DN	-0.268677	-0.00358174	-3.20472	0.00405917	0.0298868	-2.08305
WEST_ADRENOCORTICAL_CARCINOMA_VS_ADENOMA_DN	-0.311171	-0.0204268	-3.20354	0.00407051	0.0298917	-2.08563
CHARAFE_BREAST_CANCER_LUMINAL_VS_MESENCHYMAL_DN	-0.21915	0.00321089	-3.20352	0.0040707	0.0298917	-2.08567
ZWANG_EGF_INTERVAL_DN	-0.246965	0.000392658	-3.20259	0.00407962	0.0299172	-2.08769
REACTOME_PLATELET_HOMEOSTASIS	-0.229468	0.00368524	-3.20181	0.00408712	0.0299323	-2.08939
WATANABE_COLON_CANCER_MSI_VS_MSS_DN	-0.297589	0.00434564	-3.19908	0.00411363	0.0300864	-2.09537
ZHAN_MULTIPLE_MYELOMA_PR_UP	0.730226	0.0407318	3.19826	0.00412156	0.0301043	-2.09715
BIOCARTA_TOLL_PATHWAY	-0.333046	0.00832509	-3.19586	0.00414502	0.0302355	-2.1024
SANSOM_APC_TARGETS_REQUIRE_MYC	0.311511	-0.00638195	3.19298	0.00417326	0.0304013	-2.10868
PID_IL2_1PATHWAY	-0.358597	-0.00780463	-3.19164	0.0041865	0.0304091	-2.11161
PLASARI_TGFB1_TARGETS_10HR_UP	-0.237964	0.00254399	-3.19084	0.00419437	0.0304091	-2.11335
DAUER_STAT3_TARGETS_DN	-0.409211	0.000575713	-3.19074	0.00419534	0.0304091	-2.11356
HOLLERN_EMT_BREAST_TUMOR_UP	-0.269683	-0.000626727	-3.19019	0.00420083	0.0304091	-2.11477
BIOCARTA_IL17_PATHWAY	-0.352185	0.00274275	-3.19007	0.00420199	0.0304091	-2.11502
VERHAAK_AML_WITH_NPM1_MUTATED_DN	-0.235711	-0.0024361	-3.1887	0.0042156	0.0304675	-2.11801
WANG_RECURRENT_LIVER_CANCER_UP	0.462428	-0.0155379	3.18712	0.0042314	0.0304733	-2.12147
LEE_METASTASIS_AND_ALTERNATIVE_SPLICING_UP	-0.324432	0.00966698	-3.18705	0.00423203	0.0304733	-2.12161
NIKOLSKY_BREAST_CANCER_7Q21_Q22_AMPLICON	0.345471	0.00565045	3.1866	0.00423658	0.0304733	-2.1226
CHIANG_LIVER_CANCER_SUBCLASS_POLYSOMY7_DN	-0.420265	0.0107335	-3.18572	0.00424535	0.0304733	-2.12452
REACTOME_SIGNAL_REGULATORY_PROTEIN_FAMILY_INTERACTIONS	-0.398952	-0.0169341	-3.18551	0.00424749	0.0304733	-2.12498
REACTOME_REGULATION_OF_GENE_EXPRESSION_BY_HYPOXIA_INDUCIBLE_FACTOR	-0.537189	-0.00786276	-3.18529	0.00424964	0.0304733	-2.12545
LUI_THYROID_CANCER_CLUSTER_1	-0.374908	-0.00742682	-3.18077	0.00429525	0.0307602	-2.13532
BIOCARTA_PKC_PATHWAY	-0.486946	0.0224367	-3.17802	0.00432315	0.0308624	-2.1413
MIKKELSEN_NPC_HCP_WITH_H3K4ME3_AND_H3K27ME3	-0.236705	0.000878755	-3.17786	0.0043248	0.0308624	-2.14165
BIOCARTA_STRESS_PATHWAY	-0.303214	0.0104568	-3.17771	0.00432635	0.0308624	-2.14198
REACTOME_NEGATIVE_EPIGENETIC_REGULATION_OF_RRNA_EXPRESSION	0.363054	-0.00170771	3.17487	0.00435536	0.0310164	-2.14816
REACTOME_SYNDECAN_INTERACTIONS	-0.404451	-0.0253369	-3.17444	0.00435986	0.0310164	-2.14912
REACTOME_CD28_CO_STIMULATION	-0.337531	0.00921966	-3.17395	0.00436485	0.0310164	-2.15017
OHM_METHYLATED_IN_ADULT_CANCERS	-0.279463	0.00336291	-3.17015	0.00440412	0.0312551	-2.15845
ROSS_LEUKEMIA_WITH_MLL_FUSIONS	-0.206907	0.0111173	-3.16856	0.00442067	0.0313321	-2.16191
SATO_SILENCED_BY_METHYLATION_IN_PANCREATIC_CANCER_1	-0.167527	-0.00269375	-3.16622	0.00444508	0.031428	-2.167
BIOCARTA_MSP_PATHWAY	-0.492344	-0.0131181	-3.16617	0.00444563	0.031428	-2.16711
REACTOME_MITOCHONDRIAL_TRANSLATION	0.510478	0.0423392	3.16297	0.00447923	0.0316025	-2.17407
HELLEBREKERS_SILENCED_DURING_TUMOR_ANGIOGENESIS	-0.382576	-0.00773963	-3.16273	0.00448182	0.0316025	-2.1746
REACTOME_RHO_GTPASES_ACTIVATE_NADPH_OXIDASES	-0.496289	-0.00366234	-3.16153	0.00449449	0.0316514	-2.17721
ONGUSAHA_BRCA1_TARGETS_UP	-0.45995	-0.0266987	-3.16022	0.0045083	0.031708	-2.18005
GAVIN_FOXP3_TARGETS_CLUSTER_P3	-0.194192	0.0020278	-3.15885	0.00452296	0.0317705	-2.18304
SENESE_HDAC3_TARGETS_UP	-0.243477	0.00664917	-3.15763	0.00453589	0.0318114	-2.18568
REACTOME_NEPHRIN_FAMILY_INTERACTIONS	-0.325664	0.00408763	-3.15722	0.00454035	0.0318114	-2.18659
REACTOME_CHEMOKINE_RECEPTORS_BIND_CHEMOKINES	-0.314361	-0.0193127	-3.15644	0.00454864	0.0318289	-2.18827
YU_MYC_TARGETS_UP	0.629961	0.0215196	3.15254	0.0045906	0.0320817	-2.19675
HESSON_TUMOR_SUPPRESSOR_CLUSTER_3P21_3	0.550978	0.00374134	3.15178	0.00459882	0.0320984	-2.1984
LINDSTEDT_DENDRITIC_CELL_MATURATION_A	-0.336731	0.00452811	-3.15018	0.00461615	0.0321785	-2.20188
REACTOME_RNA_POLYMERASE_III_CHAIN_ELONGATION	0.508233	0.00251861	3.14766	0.00464357	0.0323287	-2.20735
MCDOWELL_ACUTE_LUNG_INJURY_DN	-0.221668	-0.00718689	-3.14609	0.00466083	0.0323745	-2.21077
REACTOME_NETRIN_MEDIATED_REPULSION_SIGNALS	-0.407495	0.0100114	-3.14518	0.00467078	0.0323745	-2.21274
BIOCARTA_TALL1_PATHWAY	-0.360677	0.0120314	-3.14509	0.00467172	0.0323745	-2.21293
REACTOME_CELL_SURFACE_INTERACTIONS_AT_THE_VASCULAR_WALL	-0.264262	-0.019947	-3.14491	0.0046737	0.0323745	-2.21331
REACTOME_RECEPTOR_TYPE_TYROSINE_PROTEIN_PHOSPHATASES	-0.298432	0.0128408	-3.14372	0.00468684	0.0324063	-2.21591
RODWELL_AGING_KIDNEY_UP	-0.278498	-0.00884545	-3.14343	0.00469008	0.0324063	-2.21654
KEGG_PROSTATE_CANCER	-0.236044	0.00753991	-3.14149	0.00471149	0.0325134	-2.22075
REACTOME_G_ALPHA_12_13_SIGNALLING_EVENTS	-0.18084	0.00440815	-3.14045	0.00472304	0.0325523	-2.22301
BIOCARTA_RANMS_PATHWAY	0.667029	0.0314517	3.13908	0.00473825	0.0325842	-2.22598
NAGY_STAGA_COMPONENTS_HUMAN	0.407327	0.00180318	3.13802	0.00475004	0.0325842	-2.22827
HEIDENBLAD_AMPLIFIED_IN_PANCREATIC_CANCER	0.327406	-0.00359395	3.13796	0.0047508	0.0325842	-2.22842
PID_THROMBIN_PAR4_PATHWAY	-0.3947	0.00743314	-3.13739	0.00475708	0.0325842	-2.22964
KRIGE_RESPONSE_TO_TOSEDOSTAT_24HR_DN	0.341892	0.0103354	3.13737	0.0047573	0.0325842	-2.22968
ABE_VEGFA_TARGETS_2HR	-0.408522	0.0034004	-3.13678	0.00476397	0.0325893	-2.23097
DITTMER_PTHLH_TARGETS_DN	-0.292689	0.00911185	-3.13583	0.00477455	0.0326212	-2.23302
HU_GENOTOXIC_DAMAGE_4HR	0.434526	0.00565667	3.1337	0.0047985	0.0327085	-2.23764
REACTOME_FCGR_ACTIVATION	-0.522817	0.00563918	-3.1334	0.00480193	0.0327085	-2.2383
REACTOME_IMMUNOREGULATORY_INTERACTIONS_BETWEEN_A_LYMPHOID_AND_A_NON_LYMPHOID_CELL	-0.240008	-0.0112987	-3.13311	0.00480518	0.0327085	-2.23892
REACTOME_SIGNALING_BY_NTRKS	-0.257055	0.00643423	-3.13114	0.00482748	0.0327935	-2.24319
KEGG_SMALL_CELL_LUNG_CANCER	-0.245569	0.0178469	-3.13096	0.00482959	0.0327935	-2.2436
LOPEZ_MESOTELIOMA_SURVIVAL_TIME_UP	0.662875	0.00811224	3.13017	0.00483854	0.0328138	-2.24531
PEREZ_TP53_TARGETS	-0.202142	-0.0010493	-3.12884	0.00485368	0.0328759	-2.24819
YAGI_AML_WITH_T_8_21_TRANSLOCATION	-0.188158	-0.00215741	-3.12362	0.00491351	0.0332402	-2.25949
HUI_MAPK14_TARGETS_UP	-0.388811	0.000978125	-3.12299	0.00492082	0.0332488	-2.26086
REACTOME_RNA_POLYMERASE_II_TRANSCRIBES_SNRNA_GENES	0.280826	-0.00468402	3.12181	0.00493448	0.0333002	-2.26342
REACTOME_OVARIAN_TUMOR_DOMAIN_PROTEASES	-0.355165	0.0118442	-3.1201	0.00495425	0.0333926	-2.26711
PID_RAC1_REG_PATHWAY	-0.316926	0.0166815	-3.11692	0.0049914	0.0336018	-2.274
MIKKELSEN_MEF_LCP_WITH_H3K4ME3	-0.27272	-0.0169992	-3.11614	0.00500059	0.0336226	-2.27569
SHAFFER_IRF4_TARGETS_IN_ACTIVATED_B_LYMPHOCYTE	-0.346439	0.00194237	-3.11543	0.00500888	0.0336226	-2.27722
MYLLYKANGAS_AMPLIFICATION_HOT_SPOT_16	-0.410215	0.00540762	-3.11462	0.00501844	0.0336226	-2.27898
PID_CERAMIDE_PATHWAY	-0.262426	0.00504455	-3.11457	0.00501894	0.0336226	-2.27907
MOOTHA_GLYCOLYSIS	-0.47381	0.0128339	-3.11393	0.00502648	0.0336322	-2.28046
REACTOME_ADENYLATE_CYCLASE_ACTIVATING_PATHWAY	-0.360107	-0.00656312	-3.11301	0.00503743	0.0336484	-2.28246
MORI_LARGE_PRE_BII_LYMPHOCYTE_DN	-0.321039	0.00372686	-3.11269	0.00504115	0.0336484	-2.28314
REACTOME_REGULATION_OF_INSULIN_SECRETION	-0.227099	0.000124203	-3.1084	0.00509213	0.0338738	-2.29242
FERRARI_RESPONSE_TO_FENRETINIDE_UP	-0.365882	0.0269761	-3.10822	0.00509428	0.0338738	-2.29281
REACTOME_INTERLEUKIN_2_FAMILY_SIGNALING	-0.303101	-0.00555383	-3.1082	0.00509458	0.0338738	-2.29287
ZHENG_BOUND_BY_FOXP3	-0.173387	0.0054848	-3.10778	0.00509955	0.0338738	-2.29376
REACTOME_SULFIDE_OXIDATION_TO_SULFATE	0.671829	-0.0139511	3.10618	0.00511871	0.0339601	-2.29722
BIOCARTA_HCMV_PATHWAY	-0.462867	-0.0124247	-3.10505	0.00513233	0.0340091	-2.29967
REACTOME_MECP2_REGULATES_TRANSCRIPTION_OF_NEURONAL_LIGANDS	-0.366499	-0.00419868	-3.10437	0.00514049	0.0340091	-2.30114
REACTOME_SUMOYLATION_OF_UBIQUITINYLATION_PROTEINS	0.369435	0.0151281	3.10402	0.00514466	0.0340091	-2.30188
KEGG_VASCULAR_SMOOTH_MUSCLE_CONTRACTION	-0.209017	-0.00425493	-3.10316	0.00515504	0.0340369	-2.30374
MEISSNER_BRAIN_HCP_WITH_H3K4ME3_AND_H3K27ME3	-0.19899	-0.00310106	-3.10232	0.00516519	0.034063	-2.30555
REACTOME_REGULATION_BY_C_FLIP	-0.394558	-0.00024128	-3.10006	0.00519265	0.0342031	-2.31044
FARMER_BREAST_CANCER_CLUSTER_3	-0.444034	0.0303916	-3.0969	0.00523129	0.0343599	-2.31727
REACTOME_NUCLEAR_IMPORT_OF_REV_PROTEIN	0.505015	0.0179301	3.09687	0.00523165	0.0343599	-2.31734
WU_HBX_TARGETS_3_UP	0.321305	-0.00599914	3.09609	0.00524123	0.0343599	-2.31902
PID_MYC_REPRESS_PATHWAY	-0.227445	0.00955107	-3.09561	0.00524709	0.0343599	-2.32005
CAFFAREL_RESPONSE_TO_THC_8HR_3_DN	0.323884	-0.020115	3.0952	0.00525216	0.0343599	-2.32094
WINTER_HYPOXIA_METAGENE	-0.3036	0.00831507	-3.09453	0.00526041	0.0343599	-2.32239
PALOMERO_GSI_SENSITIVITY_DN	-0.744619	0.0429205	-3.09427	0.00526365	0.0343599	-2.32296
MONTERO_THYROID_CANCER_POOR_SURVIVAL_UP	0.71574	0.0628622	3.09404	0.00526643	0.0343599	-2.32344
REACTOME_NETRIN_1_SIGNALING	-0.260294	-1.42742e-05	-3.09317	0.00527716	0.0343891	-2.32532
BIOCARTA_NOTCH_PATHWAY	-0.574236	0.0164753	-3.09154	0.00529736	0.0344278	-2.32884
RAO_BOUND_BY_SALL4	-0.183119	0.00309155	-3.09141	0.00529895	0.0344278	-2.32912
REACTOME_CHAPERONE_MEDIATED_AUTOPHAGY	-0.361199	0.000910666	-3.09118	0.00530188	0.0344278	-2.32963
REACTOME_LECTIN_PATHWAY_OF_COMPLEMENT_ACTIVATION	-0.550753	0.0224453	-3.08946	0.00532322	0.034499	-2.33333
REACTOME_DCC_MEDIATED_ATTRACTIVE_SIGNALING	-0.40954	0.00465736	-3.08929	0.00532539	0.034499	-2.3337
REACTOME_INTERACTIONS_OF_REV_WITH_HOST_CELLULAR_PROTEINS	0.510266	0.0213973	3.08762	0.00534624	0.0345933	-2.3373
REACTOME_FCERI_MEDIATED_MAPK_ACTIVATION	-0.279909	0.00723736	-3.08482	0.00538138	0.0347798	-2.34334
REACTOME_PKA_MEDIATED_PHOSPHORYLATION_OF_CREB	-0.37919	-0.0252967	-3.08341	0.00539916	0.0348537	-2.34638
PID_SHP2_PATHWAY	-0.286871	0.00115371	-3.07657	0.00548617	0.0353739	-2.3611
KEGG_GNRH_SIGNALING_PATHWAY	-0.270168	-0.0010985	-3.07389	0.00552065	0.0355546	-2.36687
SCHRAETS_MLL_TARGETS_DN	-0.339516	0.00751431	-3.07277	0.00553524	0.035578	-2.3693
BROWNE_HCMV_INFECTION_10HR_DN	-0.24568	-0.00295938	-3.07261	0.00553723	0.035578	-2.36963
REACTOME_COLLAGEN_FORMATION	-0.320901	-0.00782025	-3.07044	0.00556547	0.0356498	-2.37432
REACTOME_SUMOYLATION_OF_TRANSCRIPTION_FACTORS	-0.317081	0.0263658	-3.07037	0.00556628	0.0356498	-2.37445
GEISS_RESPONSE_TO_DSRNA_DN	-0.491685	-0.0088614	-3.07025	0.00556785	0.0356498	-2.37471
CHIANG_LIVER_CANCER_SUBCLASS_CTNNB1_DN	-0.217724	-0.00739781	-3.06904	0.00558364	0.0356951	-2.37732
PID_RET_PATHWAY	-0.427401	0.00498353	-3.06868	0.0055883	0.0356951	-2.37809
CHEN_LIVER_METABOLISM_QTL_CIS	-0.261467	-0.00767595	-3.06812	0.00559573	0.0356951	-2.37931
ZHENG_FOXP3_TARGETS_IN_THYMUS_UP	-0.224533	0.00413297	-3.06772	0.00560088	0.0356951	-2.38016
TONKS_TARGETS_OF_RUNX1_RUNX1T1_FUSION_ERYTHROCYTE_DN	-0.392751	0.0409877	-3.06594	0.00562423	0.0357853	-2.38399
PID_AJDISS_2PATHWAY	-0.278756	0.0138972	-3.06565	0.00562805	0.0357853	-2.38461
WUNDER_INFLAMMATORY_RESPONSE_AND_CHOLESTEROL_DN	-0.506242	0.00159419	-3.06387	0.0056515	0.0358929	-2.38844
GENTILE_UV_RESPONSE_CLUSTER_D9	-0.414753	0.013957	-3.06242	0.00567074	0.0359735	-2.39157
BIOCARTA_GSK3_PATHWAY	-0.295702	0.00908736	-3.06189	0.00567772	0.0359764	-2.3927
DORSEY_GAB2_TARGETS	-0.303723	-0.00194579	-3.0589	0.00571746	0.0361864	-2.39912
REACTOME_SIGNALING_BY_SCF_KIT	-0.2653	0.00925774	-3.05499	0.00576991	0.0364348	-2.40752
KRIGE_RESPONSE_TO_TOSEDOSTAT_24HR_UP	-0.248632	-0.00426019	-3.05484	0.00577191	0.0364348	-2.40784
REACTOME_SIGNAL_TRANSDUCTION_BY_L1	-0.422967	0.0141975	-3.05406	0.00578251	0.0364348	-2.40953
KOHOUTEK_CCNT1_TARGETS	-0.268973	-0.0178547	-3.05401	0.0057832	0.0364348	-2.40964
REACTOME_DEGRADATION_OF_CYSTEINE_AND_HOMOCYSTEINE	0.440156	0.029034	3.05167	0.00581477	0.0365723	-2.41465
BUYTAERT_PHOTODYNAMIC_THERAPY_STRESS_UP	-0.25375	0.00416913	-3.05108	0.0058228	0.0365723	-2.41592
MIKKELSEN_DEDIFFERENTIATED_STATE_UP	-0.409324	0.0194591	-3.05092	0.00582497	0.0365723	-2.41626
PID_CXCR3_PATHWAY	-0.308727	-0.00510492	-3.04774	0.00586837	0.0368028	-2.42309
COULOUARN_TEMPORAL_TGFB1_SIGNATURE_UP	-0.205687	0.00240682	-3.04563	0.00589729	0.036942	-2.42761
SOTIRIOU_BREAST_CANCER_GRADE_1_VS_3_UP	0.627746	0.0355041	3.04376	0.00592308	0.0370614	-2.43163
SHIPP_DLBCL_VS_FOLLICULAR_LYMPHOMA_DN	-0.242211	0.000759746	-3.04303	0.00593314	0.0370821	-2.43319
BHAT_ESR1_TARGETS_VIA_AKT1_DN	-0.320175	-0.00930454	-3.04223	0.00594435	0.037107	-2.43492
AMIT_EGF_RESPONSE_60_HELA	-0.260284	0.00792534	-3.04177	0.00595062	0.037107	-2.43589
HOSHIDA_LIVER_CANCER_SURVIVAL_UP	-0.239408	-0.000485267	-3.04013	0.00597352	0.0372077	-2.43943
REACTOME_ANCHORING_OF_THE_BASAL_BODY_TO_THE_PLASMA_MEMBRANE	0.349145	-0.011487	3.03887	0.00599101	0.0372744	-2.44211
CAFFAREL_RESPONSE_TO_THC_UP	-0.283782	0.0160749	-3.03797	0.00600363	0.0373107	-2.44405
GAUSSMANN_MLL_AF4_FUSION_TARGETS_E_DN	-0.317756	0.00235661	-3.03681	0.00601986	0.0373694	-2.44653
REACTOME_PIWI_INTERACTING_RNA_PIRNA_BIOGENESIS	0.347769	0.00814028	3.03557	0.0060373	0.0374063	-2.44919
PID_AVB3_OPN_PATHWAY	-0.330961	-0.00417755	-3.03542	0.00603941	0.0374063	-2.44951
BIOCARTA_BCR_PATHWAY	-0.3849	0.00474732	-3.03428	0.00605551	0.03745	-2.45196
WHITFIELD_CELL_CYCLE_G2	0.371436	0.0064485	3.03353	0.00606608	0.03745	-2.45356
ZHAN_MULTIPLE_MYELOMA_DN	-0.312771	-0.0301341	-3.03347	0.0060669	0.03745	-2.45369
WILENSKY_RESPONSE_TO_DARAPLADIB	-0.422548	-0.002326	-3.03251	0.00608042	0.0374914	-2.45574
REACTOME_DEFECTIVE_TPR_MAY_CONFER_SUSCEPTIBILITY_TOWARDS_THYROID_PAPILLARY_CARCINOMA_TPC	0.460003	0.0168442	3.0309	0.00610335	0.0375805	-2.4592
BIOCARTA_TSP1_PATHWAY	-0.521804	0.0022735	-3.03053	0.00610854	0.0375805	-2.45998
VALK_AML_CLUSTER_13	-0.358841	-0.00413047	-3.02871	0.00613448	0.0376979	-2.46387
MARTINELLI_IMMATURE_NEUTROPHIL_DN	-0.308804	0.00319863	-3.02757	0.00615087	0.0377565	-2.46633
CHANDRAN_METASTASIS_TOP50_DN	-0.29508	0.00619169	-3.02644	0.00616702	0.0378134	-2.46874
DAVICIONI_RHABDOMYOSARCOMA_PAX_FOXO1_FUSION_UP	-0.265225	0.00334793	-3.02595	0.00617413	0.0378148	-2.46979
KARAKAS_TGFB1_SIGNALING	0.266875	0.00378654	3.02505	0.00618704	0.0378518	-2.47172
REACTOME_CREB1_PHOSPHORYLATION_THROUGH_NMDA_RECEPTOR_MEDIATED_ACTIVATION_OF_RAS_SIGNALING	-0.29791	0.0032149	-3.02315	0.00621445	0.0379772	-2.47578
KONDO_EZH2_TARGETS	-0.24364	0.00197689	-3.01911	0.00627314	0.0382933	-2.48442
GOUYER_TUMOR_INVASIVENESS	-0.494579	0.00178543	-3.01672	0.00630822	0.0384648	-2.48954
TARTE_PLASMA_CELL_VS_PLASMABLAST_UP	-0.223223	-0.00590536	-3.01532	0.00632873	0.0385127	-2.49252
REACTOME_TRAFFICKING_AND_PROCESSING_OF_ENDOSOMAL_TLR	-0.536869	0.010604	-3.01523	0.00633009	0.0385127	-2.49272
YAO_TEMPORAL_RESPONSE_TO_PROGESTERONE_CLUSTER_1	-0.324038	-0.00966062	-3.01446	0.00634142	0.038539	-2.49436
WU_SILENCED_BY_METHYLATION_IN_BLADDER_CANCER	-0.323212	-0.000109254	-3.00836	0.00643206	0.0390467	-2.5074
REACTOME_REGULATION_OF_FOXO_TRANSCRIPTIONAL_ACTIVITY_BY_ACETYLATION	-0.561695	0.0180598	-3.00693	0.00645341	0.0391331	-2.51044
BAELDE_DIABETIC_NEPHROPATHY_UP	-0.230007	0.00304124	-3.00598	0.00646764	0.0391762	-2.51247
MARSON_BOUND_BY_E2F4_UNSTIMULATED	0.408787	0.0101603	3.00385	0.00649977	0.0392839	-2.51702
REACTOME_ROLE_OF_LAT2_NTAL_LAB_ON_CALCIUM_MOBILIZATION	-0.444316	-0.00792711	-3.00353	0.00650461	0.0392839	-2.5177
MIZUKAMI_HYPOXIA_UP	-0.447346	0.000936279	-3.00338	0.00650684	0.0392839	-2.51802
HOFFMANN_PRE_BI_TO_LARGE_PRE_BII_LYMPHOCYTE_DN	-0.217116	0.00830276	-3	0.00655809	0.0395318	-2.52522
KERLEY_RESPONSE_TO_CISPLATIN_DN	-0.492659	-0.0394038	-2.99973	0.00656228	0.0395318	-2.52581
BOSCO_INTERFERON_INDUCED_ANTIVIRAL_MODULE	-0.326126	-0.0069506	-2.99636	0.0066138	0.0397986	-2.53299
REACTOME_OPIOID_SIGNALLING	-0.206855	-0.00522363	-2.99529	0.00663023	0.0398538	-2.53527
GAVIN_FOXP3_TARGETS_CLUSTER_T4	-0.192884	0.00526721	-2.9942	0.00664715	0.0398756	-2.53761
ZHENG_GLIOBLASTOMA_PLASTICITY_DN	-0.266653	0.00424719	-2.99389	0.00665195	0.0398756	-2.53827
REACTOME_HS_GAG_BIOSYNTHESIS	-0.33974	-0.0124075	-2.99336	0.0066601	0.0398756	-2.53939
PID_TRAIL_PATHWAY	-0.300392	0.00882648	-2.99318	0.00666285	0.0398756	-2.53977
SIG_IL4RECEPTOR_IN_B_LYPHOCYTES	-0.455213	-0.0179603	-2.99154	0.00668832	0.0399174	-2.54327
LEE_LIVER_CANCER_CIPROFIBRATE_UP	-0.220981	-0.00962741	-2.99134	0.00669134	0.0399174	-2.54369
KIM_WT1_TARGETS_UP	-0.292228	0.00135404	-2.99108	0.00669546	0.0399174	-2.54425
WOO_LIVER_CANCER_RECURRENCE_UP	-0.254008	0.000737307	-2.99086	0.00669887	0.0399174	-2.54472
GENTLES_LEUKEMIC_STEM_CELL_UP	-0.320274	0.00407911	-2.98871	0.00673238	0.040026	-2.5493
LAIHO_COLORECTAL_CANCER_SERRATED_UP	-0.207773	0.00345432	-2.98841	0.00673696	0.040026	-2.54993
REACTOME_POU5F1_OCT4_SOX2_NANOG_ACTIVATE_GENES_RELATED_TO_PROLIFERATION	-0.398076	0.0269868	-2.98829	0.00673892	0.040026	-2.55019
REACTOME_TRNA_AMINOACYLATION	0.41695	0.0120172	2.98554	0.00678206	0.0402123	-2.55605
REACTOME_MAPK3_ERK1_ACTIVATION	-0.532513	-0.0115896	-2.98536	0.0067849	0.0402123	-2.55643
HASLINGER_B_CLL_WITH_6Q21_DELETION	-0.479022	0.0201195	-2.98471	0.00679515	0.0402296	-2.55782
SHEPARD_CRUSH_AND_BURN_MUTANT_DN	0.29216	-0.00235975	2.98004	0.00686902	0.0406169	-2.56774
REACTOME_CREATION_OF_C4_AND_C2_ACTIVATORS	-0.390227	-0.0173715	-2.97965	0.00687534	0.0406169	-2.56858
LI_WILMS_TUMOR_VS_FETAL_KIDNEY_2_DN	-0.332385	-0.0205409	-2.97911	0.00688383	0.0406235	-2.56972
GHANDHI_DIRECT_IRRADIATION_UP	-0.332495	0.014043	-2.97539	0.00694354	0.0409145	-2.57764
MOHANKUMAR_HOXA1_TARGETS_DN	-0.213073	-0.00159283	-2.97456	0.00695694	0.0409145	-2.57941
MAGRANGEAS_MULTIPLE_MYELOMA_IGLL_VS_IGLK_DN	-0.33382	-0.00280302	-2.97448	0.00695814	0.0409145	-2.57957
REACTOME_HEMOSTASIS	-0.188111	-0.00554806	-2.97419	0.0069629	0.0409145	-2.58019
MCCABE_HOXC6_TARGETS_DN	-0.33293	0.00684198	-2.97119	0.00701144	0.0411557	-2.58657
REACTOME_INTEGRATION_OF_PROVIRUS	0.456875	0.00966481	2.96988	0.00703267	0.0412363	-2.58934
SABATES_COLORECTAL_ADENOMA_UP	-0.188882	-0.0117721	-2.96904	0.00704637	0.0412726	-2.59112
HASEGAWA_TUMORIGENESIS_BY_RET_C634R	-0.613695	-0.0156912	-2.96718	0.0070768	0.0414068	-2.59508
KINSEY_TARGETS_OF_EWSR1_FLII_FUSION_DN	-0.31563	-0.00711089	-2.9663	0.00709135	0.0414479	-2.59696
NABA_MATRISOME	-0.188253	-0.00352318	-2.96519	0.0071095	0.0415098	-2.5993
PID_AP1_PATHWAY	-0.297417	-0.00166793	-2.96458	0.00711962	0.0415248	-2.60061
WEI_MYCN_TARGETS_WITH_E_BOX	0.381294	0.00588063	2.96407	0.00712798	0.0415296	-2.60168
SMIRNOV_RESPONSE_TO_IR_6HR_UP	-0.189739	-0.00103867	-2.96345	0.00713821	0.0415423	-2.603
PID_FAS_PATHWAY	-0.27975	0.0017314	-2.96284	0.00714834	0.0415423	-2.6043
KEGG_FOCAL_ADHESION	-0.224195	-0.0063599	-2.96257	0.00715283	0.0415423	-2.60487
BIOCARTA_LDL_PATHWAY	-0.505356	-0.0167403	-2.96147	0.00717104	0.0415444	-2.6072
KEGG_ACUTE_MYELOID_LEUKEMIA	-0.295082	-0.00258359	-2.96119	0.00717558	0.0415444	-2.60778
NABA_ECM_AFFILIATED	-0.233112	-0.000405977	-2.96118	0.00717586	0.0415444	-2.60782
THEILGAARD_NEUTROPHIL_AT_SKIN_WOUND_DN	-0.187572	0.00503574	-2.96024	0.00719146	0.041591	-2.60981
REACTOME_ROLE_OF_ABL_IN_ROBO_SLIT_SIGNALING	-0.42636	-0.0293864	-2.95975	0.00719962	0.0415944	-2.61085
BRIDEAU_IMPRINTED_GENES	-0.202058	0.00106289	-2.95879	0.00721555	0.0416427	-2.61288
THEODOROU_MAMMARY_TUMORIGENESIS	-0.30015	-0.0225216	-2.95654	0.00725323	0.0417631	-2.61765
JAEGER_METASTASIS_DN	-0.181238	0.00341907	-2.95645	0.00725474	0.0417631	-2.61784
ZHU_CMV_8_HR_UP	-0.336924	0.0101205	-2.95619	0.00725919	0.0417631	-2.6184
BURTON_ADIPOGENESIS_5	0.302969	-0.00308394	2.95517	0.00727628	0.0417676	-2.62056
WANG_ADIPOGENIC_GENES_REPRESSED_BY_SIRT1	-0.328875	-0.0181872	-2.95492	0.00728056	0.0417676	-2.6211
KOKKINAKIS_METHIONINE_DEPRIVATION_48HR_UP	-0.19319	-0.00746944	-2.95479	0.00728275	0.0417676	-2.62137
ROYLANCE_BREAST_CANCER_16Q_COPY_NUMBER_UP	0.25243	0.00384811	2.95303	0.00731246	0.0418943	-2.62511
MCCLUNG_COCAIN_REWARD_4WK	-0.266979	0.0151299	-2.95177	0.00733381	0.0419367	-2.62778
REACTOME_TRANSPORT_OF_MATURE_TRANSCRIPT_TO_CYTOPLASM	0.413764	0.0103401	2.95163	0.00733605	0.0419367	-2.62806
BURTON_ADIPOGENESIS_9	-0.290267	0.00322059	-2.94973	0.00736835	0.0419367	-2.63208
HUANG_FOXA2_TARGETS_UP	-0.292024	-0.00246837	-2.94921	0.00737731	0.0419367	-2.6332
WANG_RESPONSE_TO_GSK3_INHIBITOR_SB216763_UP	-0.279545	-0.0168191	-2.94874	0.00738527	0.0419367	-2.63419
LEE_METASTASIS_AND_RNA_PROCESSING_UP	0.502304	0.000204756	2.94863	0.00738713	0.0419367	-2.63442
SUBTIL_PROGESTIN_TARGETS	-0.304788	-0.0108208	-2.94825	0.00739373	0.0419367	-2.63524
KEGG_RNA_POLYMERASE	0.464006	0.00302627	2.9482	0.00739458	0.0419367	-2.63534
REACTOME_MOLECULES_ASSOCIATED_WITH_ELASTIC_FIBRES	-0.32584	-0.0180646	-2.94813	0.00739566	0.0419367	-2.63547
BROWNE_HCMV_INFECTION_16HR_DN	-0.198342	0.0177336	-2.94811	0.00739611	0.0419367	-2.63553
WANG_RESPONSE_TO_BEXAROTENE_DN	-0.284629	0.000476949	-2.9464	0.00742535	0.042033	-2.63914
REACTOME_GLUCAGON_LIKE_PEPTIDE_1_GLP1_REGULATES_INSULIN_SECRETION	-0.239948	-0.00302544	-2.94622	0.00742839	0.042033	-2.63952
PEREZ_TP53_AND_TP63_TARGETS	-0.266624	-0.00628442	-2.94468	0.00745494	0.04214	-2.64279
MOSERLE_IFNA_RESPONSE	-0.457756	-0.0241211	-2.93936	0.00754701	0.0426064	-2.65403
FISCHER_G2_M_CELL_CYCLE	0.473734	0.016943	2.93902	0.00755295	0.0426064	-2.65475
REACTOME_CONDENSATION_OF_PROMETAPHASE_CHROMOSOMES	0.569658	0.0164908	2.93788	0.00757287	0.0426611	-2.65717
VALK_AML_WITH_EVI1	-0.325503	-0.0229276	-2.93758	0.00757816	0.0426611	-2.65781
KEGG_HOMOLOGOUS_RECOMBINATION	0.454159	0.00204676	2.93475	0.00762783	0.0428968	-2.66379
SMID_BREAST_CANCER_RELAPSE_IN_BONE_DN	-0.204411	0.00125839	-2.93399	0.00764115	0.0429278	-2.66539
REACTOME_DEFECTIVE_LFNG_CAUSES_SCDO3	-0.515552	-0.0100304	-2.93146	0.00768601	0.0431358	-2.67075
HADDAD_B_LYMPHOCYTE_PROGENITOR	-0.195482	-0.00350975	-2.93036	0.00770543	0.0432007	-2.67306
GARGALOVIC_RESPONSE_TO_OXIDIZED_PHOSPHOLIPIDS_PINK_DN	-0.366013	-0.00531166	-2.92851	0.00773852	0.043342	-2.67698
ZHANG_GATA6_TARGETS_UP	-0.340626	-0.0264007	-2.92706	0.00776432	0.0434423	-2.68003
KIM_WT1_TARGETS_12HR_UP	-0.224215	0.00184444	-2.92647	0.00777496	0.0434576	-2.68128
DACOSTA_ERCC3_ALLELE_XPCS_VS_TTD_UP	-0.321562	0.0278656	-2.92577	0.00778754	0.0434838	-2.68276
BIOCARTA_BBCELL_PATHWAY	-0.507108	-0.00135504	-2.92264	0.00784388	0.0437539	-2.68936
KORKOLA_EMBRYONAL_CARCINOMA_DN	0.32066	0.0110295	2.92014	0.00788923	0.0439623	-2.69464
TAKEDA_TARGETS_OF_NUP98_HOXA9_FUSION_3D_UP	-0.266717	-0.00101512	-2.91936	0.00790354	0.0439975	-2.69629
REACTOME_MRNA_DECAY_BY_3_TO_5_EXORIBONUCLEASE	0.554522	0.0221719	2.91887	0.00791235	0.0440019	-2.69731
BROWNE_HCMV_INFECTION_48HR_DN	-0.17807	-0.00177589	-2.91558	0.00797262	0.0442813	-2.70426
REACTOME_SYNTHESIS_OF_15_EICOSATETRAENOIC_ACID_DERIVATIVES	-0.525525	0.0329206	-2.91525	0.00797868	0.0442813	-2.70495
BURTON_ADIPOGENESIS_PEAK_AT_2HR	-0.360507	0.0426605	-2.91421	0.0079978	0.0442989	-2.70714
REACTOME_CD28_DEPENDENT_PI3K_AKT_SIGNALING	-0.300002	-0.00524965	-2.91402	0.00800125	0.0442989	-2.70754
PID_NETRIN_PATHWAY	-0.389815	0.000252633	-2.91356	0.00800975	0.0442989	-2.70851
AMUNDSON_DNA_DAMAGE_RESPONSE_TP53	-0.508759	-0.0100544	-2.91305	0.00801925	0.0442989	-2.70959
KEGG_GLYCOLYSIS_GLUCONEOGENESIS	-0.246784	0.00088269	-2.91266	0.00802636	0.0442989	-2.7104
BIOCARTA_CALCINEURIN_PATHWAY	-0.425141	0.00948414	-2.91246	0.00803019	0.0442989	-2.71084
RAMPON_ENRICHED_LEARNING_ENVIRONMENT_EARLY_DN	-0.308867	0.0240995	-2.91156	0.00804677	0.0443252	-2.71273
GARGALOVIC_RESPONSE_TO_OXIDIZED_PHOSPHOLIPIDS_MAGENTA_UP	-0.353726	0.010079	-2.91133	0.00805107	0.0443252	-2.71322
SIMBULAN_PARP1_TARGETS_UP	-0.340951	-0.0148624	-2.90993	0.00807695	0.0444232	-2.71615
NAKAJIMA_MAST_CELL	-0.299713	0.0253086	-2.9083	0.00810747	0.0444937	-2.7196
WANG_CISPLATIN_RESPONSE_AND_XPC_DN	-0.204354	-0.00796012	-2.90824	0.00810854	0.0444937	-2.71972
REACTOME_COMPLEX_I_BIOGENESIS	0.34458	0.00221746	2.90794	0.00811404	0.0444937	-2.72034
LEI_HOXC8_TARGETS_DN	-0.420846	0.000140783	-2.90433	0.00818175	0.0448203	-2.72794
KIM_HYPOXIA	-0.566997	0.0191331	-2.90307	0.00820567	0.044889	-2.73061
REACTOME_PKA_ACTIVATION_IN_GLUCAGON_SIGNALLING	-0.371513	-0.023079	-2.90272	0.00821227	0.044889	-2.73135
KEGG_RENAL_CELL_CARCINOMA	-0.269514	0.0102419	-2.90237	0.00821877	0.044889	-2.73207
AMIT_SERUM_RESPONSE_60_MCF10A	-0.287938	-0.000907742	-2.90181	0.00822936	0.0449022	-2.73325
BENNETT_SYSTEMIC_LUPUS_ERYTHEMATOSUS	-0.399089	-0.0334932	-2.90133	0.00823856	0.0449022	-2.73427
INGRAM_SHH_TARGETS_UP	-0.209241	-0.00330744	-2.90042	0.0082557	0.0449022	-2.73617
ENGELMANN_CANCER_PROGENITORS_DN	-0.173603	-0.00779494	-2.89953	0.00827277	0.0449022	-2.73806
TONKS_TARGETS_OF_RUNX1_RUNX1T1_FUSION_HSC_DN	-0.237384	-0.00406785	-2.89919	0.00827914	0.0449022	-2.73877
PASQUALUCCI_LYMPHOMA_BY_GC_STAGE_DN	-0.202676	0.00266914	-2.89906	0.00828171	0.0449022	-2.73905
VERRECCHIA_EARLY_RESPONSE_TO_TGFB1	-0.301162	-0.00453696	-2.89883	0.00828594	0.0449022	-2.73952
HELLER_HDAC_TARGETS_UP	-0.20363	-0.00117639	-2.8988	0.00828649	0.0449022	-2.73958
CHUNG_BLISTER_CYTOTOXICITY_DN	-0.372816	-0.00424217	-2.89757	0.00831014	0.044986	-2.74218
REACTOME_APC_CDC20_MEDIATED_DEGRADATION_OF_NEK2A	0.399478	-0.0185156	2.89712	0.00831875	0.0449883	-2.74313
PICCALUGA_ANGIOIMMUNOBLASTIC_LYMPHOMA_DN	-0.28241	-0.00496704	-2.895	0.00835938	0.0451241	-2.74758
PID_PTP1B_PATHWAY	-0.252476	-0.00290145	-2.89479	0.00836333	0.0451241	-2.74802
BIOCARTA_FIBRINOLYSIS_PATHWAY	-0.388409	-0.00404941	-2.89432	0.00837247	0.0451241	-2.74902
REACTOME_RNA_POLYMERASE_III_TRANSCRIPTION	0.290635	-0.0109473	2.8941	0.00837668	0.0451241	-2.74947
MIKKELSEN_NPC_ICP_WITH_H3K27ME3	-0.251286	-0.000753235	-2.89343	0.00838958	0.0451494	-2.75088
BIOCARTA_P53HYPOXIA_PATHWAY	-0.38172	0.0230865	-2.89276	0.00840251	0.0451748	-2.75229
LIU_SOX4_TARGETS_UP	-0.242625	0.000367024	-2.89213	0.00841462	0.0451957	-2.75361
SMID_BREAST_CANCER_NORMAL_LIKE_UP	-0.227063	-0.0113943	-2.88884	0.00847851	0.0454945	-2.76052
PID_ERBB1_RECEPTOR_PROXIMAL_PATHWAY	-0.38058	8.11883e-05	-2.88788	0.00849731	0.0455509	-2.76254
AMIT_EGF_RESPONSE_20_HELA	-0.406117	0.0402185	-2.88659	0.00852253	0.0456416	-2.76525
ODONNELL_TFRC_TARGETS_DN	0.442571	0.00743457	2.8858	0.00853793	0.0456796	-2.7669
REACTOME_REGULATION_OF_LOCALIZATION_OF_FOXO_TRANSCRIPTION_FACTORS	-0.413978	0.0307337	-2.88493	0.00855507	0.0457268	-2.76873
ONKEN_UVEAL_MELANOMA_UP	-0.177715	-0.000993969	-2.88339	0.00858523	0.0458434	-2.77195
REACTOME_CALCITONIN_LIKE_LIGAND_RECEPTORS	-0.459993	-0.00252507	-2.88269	0.00859918	0.0458458	-2.77343
GOBERT_OLIGODENDROCYTE_DIFFERENTIATION_DN	-0.184678	-0.000154258	-2.88253	0.00860234	0.0458458	-2.77377
HELLER_SILENCED_BY_METHYLATION_DN	-0.228312	0.00140163	-2.87964	0.00865959	0.0461063	-2.77983
REACTOME_SUMOYLATION_OF_CHROMATIN_ORGANIZATION_PROTEINS	0.318318	0.0030564	2.87804	0.00869128	0.0462302	-2.78317
REACTOME_FGFR1B_LIGAND_BINDING_AND_ACTIVATION	-0.516388	0.029626	-2.8772	0.00870813	0.0462517	-2.78494
STREICHER_LSM1_TARGETS_DN	-0.394543	0.00221248	-2.877	0.00871214	0.0462517	-2.78536
PURBEY_TARGETS_OF_CTBP1_AND_SATB1_DN	0.194794	0.00537677	2.87605	0.00873119	0.0463081	-2.78735
WANG_METHYLATED_IN_BREAST_CANCER	-0.35437	0.0138078	-2.8741	0.00877028	0.046438	-2.79143
VANHARANTA_UTERINE_FIBROID_UP	-0.308101	-0.0120815	-2.87399	0.00877256	0.046438	-2.79167
ZHENG_FOXP3_TARGETS_IN_THYMUS_DN	-0.299874	0.00415708	-2.8735	0.00878241	0.0464455	-2.79269
SHEPARD_BMYB_TARGETS	0.349908	0.00157733	2.87297	0.00879303	0.0464569	-2.7938
REACTOME_AXON_GUIDANCE	-0.143195	0.0048199	-2.87251	0.00880231	0.0464613	-2.79476
HOEGERKORP_CD44_TARGETS_DIRECT_UP	-0.208994	0.0063777	-2.87156	0.00882155	0.0464715	-2.79675
KEGG_ENDOCYTOSIS	-0.226938	0.00558149	-2.87126	0.00882755	0.0464715	-2.79738
DELASERNA_MYOD_TARGETS_UP	-0.1901	0.0054838	-2.87116	0.00882958	0.0464715	-2.79759
PID_TCR_PATHWAY	-0.225945	0.00891366	-2.87024	0.00884829	0.0465254	-2.79952
BIOCARTA_BAD_PATHWAY	-0.274168	-0.00153314	-2.86976	0.00885806	0.0465323	-2.80053
REACTOME_RNA_POLYMERASE_II_TRANSCRIPTION_TERMINATION	0.404253	0.014369	2.86734	0.00890734	0.0467465	-2.80559
HUANG_DASATINIB_RESISTANCE_UP	-0.250353	0.00121852	-2.86627	0.00892923	0.0468167	-2.80783
LEE_NEURAL_CREST_STEM_CELL_DN	-0.219749	-0.00016579	-2.86499	0.00895546	0.0469096	-2.81051
WIELAND_UP_BY_HBV_INFECTION	-0.369168	-0.00993588	-2.86286	0.00899919	0.0470937	-2.81496
TONKS_TARGETS_OF_RUNX1_RUNX1T1_FUSION_MONOCYTE_DN	-0.25895	-0.00125511	-2.86231	0.00901052	0.0471082	-2.81611
FERREIRA_EWINGS_SARCOMA_UNSTABLE_VS_STABLE_UP	0.423452	0.00984149	2.86086	0.00904066	0.0471377	-2.81915
CAFFAREL_RESPONSE_TO_THC_8HR_3_UP	-0.499304	0.0327913	-2.86077	0.00904235	0.0471377	-2.81933
YAMASHITA_METHYLATED_IN_PROSTATE_CANCER	-0.2236	-0.0046012	-2.86069	0.00904411	0.0471377	-2.8195
VALK_AML_WITH_CEBPA	-0.273218	0.00103305	-2.86038	0.00905044	0.0471377	-2.82014
ZHOU_CELL_CYCLE_GENES_IN_IR_RESPONSE_24HR	0.556501	0.0293773	2.85921	0.00907482	0.04722	-2.8226
LANDIS_ERBB2_BREAST_TUMORS_324_DN	-0.239477	-0.0152762	-2.85526	0.00915719	0.0476035	-2.83084
HALMOS_CEBPA_TARGETS_UP	-0.236195	0.0110252	-2.85483	0.00916622	0.0476055	-2.83174
REACTOME_PHOSPHATE_BOND_HYDROLYSIS_BY_NUDT_PROTEINS	0.565237	0.0152951	2.85397	0.00918426	0.0476542	-2.83354
TSENG_IRS1_TARGETS_DN	-0.237987	0.00812675	-2.85319	0.00920085	0.0476953	-2.83518
FRASOR_TAMOXIFEN_RESPONSE_DN	-0.294744	0.00743414	-2.85277	0.00920963	0.0476958	-2.83605
ROZANOV_MMP14_TARGETS_DN	-0.292483	-0.00994067	-2.85179	0.00923025	0.0477549	-2.83809
SESTO_RESPONSE_TO_UV_C5	-0.31731	0.00312075	-2.85141	0.00923841	0.0477549	-2.8389
PID_S1P_S1P1_PATHWAY	-0.316952	-0.014847	-2.84789	0.00931298	0.0480952	-2.84624
BILD_CTNNB1_ONCOGENIC_SIGNATURE	-0.251583	0.00223304	-2.84513	0.00937202	0.0483547	-2.852
JOHANSSON_GLIOMAGENESIS_BY_PDGFB_DN	-0.327699	0.00224708	-2.84433	0.00938912	0.0483975	-2.85366
LU_IL4_SIGNALING	-0.245029	0.00680047	-2.84195	0.00944039	0.0486029	-2.85863
MIKKELSEN_MEF_ICP_WITH_H3K4ME3_AND_H3K27ME3	-0.213155	-0.0122535	-2.84159	0.00944821	0.0486029	-2.85938
REACTOME_HOST_INTERACTIONS_WITH_INFLUENZA_FACTORS	0.404455	0.00563489	2.84125	0.00945547	0.0486029	-2.86009
BENPORATH_ES_WITH_H3K27ME3	-0.152618	0.00601041	-2.83955	0.00949235	0.0487445	-2.86363
REACTOME_NEGATIVE_REGULATION_OF_TCF_DEPENDENT_SIGNALING_BY_WNT_LIGAND_ANTAGONISTS	-0.39833	-0.000774994	-2.83916	0.00950074	0.0487445	-2.86444
SA_B_CELL_RECEPTOR_COMPLEXES	-0.370459	0.00244924	-2.83836	0.00951821	0.0487884	-2.86612
PID_SYNDECAN_1_PATHWAY	-0.310836	-0.0124451	-2.83756	0.00953555	0.0487884	-2.86778
BIOCARTA_LAIR_PATHWAY	-0.38082	-0.0100607	-2.83754	0.00953592	0.0487884	-2.86781
SENESE_HDAC1_AND_HDAC2_TARGETS_UP	-0.243707	0.0120568	-2.83604	0.00956881	0.0489112	-2.87095
MYLLYKANGAS_AMPLIFICATION_HOT_SPOT_17	-0.309078	0.00358884	-2.83263	0.00964348	0.0491357	-2.87804
KUNINGER_IGF1_VS_PDGFB_TARGETS_DN	-0.301203	0.0208707	-2.83245	0.00964749	0.0491357	-2.87842
CROONQUIST_NRAS_SIGNALING_UP	-0.356517	0.00134633	-2.83237	0.00964921	0.0491357	-2.87858
REACTOME_MULTIFUNCTIONAL_ANION_EXCHANGERS	-0.397922	-0.0034878	-2.83228	0.00965121	0.0491357	-2.87877
RAMASWAMY_METASTASIS_DN	-0.228924	-0.00924463	-2.83191	0.00965938	0.0491357	-2.87954
WELCSH_BRCA1_TARGETS_DN	0.32577	-0.0013979	2.8316	0.00966633	0.0491357	-2.88019
MATHEW_FANCONI_ANEMIA_GENES	0.576019	0.0201885	2.83052	0.00969008	0.0491944	-2.88243
MORI_EMU_MYC_LYMPHOMA_BY_ONSET_TIME_DN	-0.397943	0.0267675	-2.83027	0.00969577	0.0491944	-2.88297
KRIEG_HYPOXIA_NOT_VIA_KDM3A	-0.234645	0.0048166	-2.82863	0.00973213	0.0492245	-2.88638
REACTOME_APC_C:CDC20_MEDIATED_DEGRADATION_OF_CYCLIN_B	0.405481	-0.0233191	2.8285	0.00973488	0.0492245	-2.88663
KONDO_COLON_CANCER_HCP_WITH_H3K27ME1	-0.269608	0.0101774	-2.82839	0.00973741	0.0492245	-2.88687
REACTOME_PHOSPHORYLATION_OF_THE_APC_C	0.452062	-0.00885803	2.82812	0.00974331	0.0492245	-2.88742
GINESTIER_BREAST_CANCER_20Q13_AMPLIFICATION_UP	-0.240443	-0.000801818	-2.82798	0.00974644	0.0492245	-2.88772
REACTOME_SUMOYLATION_OF_SUMOYLATION_PROTEINS	0.4296	0.0120538	2.82742	0.00975902	0.0492427	-2.88889
KRIGE_RESPONSE_TO_TOSEDOSTAT_6HR_DN	0.291041	0.00718096	2.82381	0.00983968	0.0496043	-2.89639
ZHAN_MULTIPLE_MYELOMA_CD1_VS_CD2_UP	-0.303334	0.00568212	-2.81845	0.00996071	0.0501684	-2.90753
BIOCARTA_IFNG_PATHWAY	-0.551004	0.0225912	-2.81726	0.00998786	0.0502591	-2.91001
FISCHER_DREAM_TARGETS	0.454106	0.00792736	2.81633	0.010009	0.0503043	-2.91194
KAYO_AGING_MUSCLE_UP	-0.165814	0.00977703	-2.81576	0.010022	0.0503043	-2.91311
CHIANG_LIVER_CANCER_SUBCLASS_UNANNOTATED_DN	0.382097	-0.00298641	2.81566	0.0100243	0.0503043	-2.91333
REACTOME_RRNA_MODIFICATION_IN_THE_NUCLEUS_AND_CYTOSOL	0.482722	0.0141638	2.81515	0.0100359	0.0503165	-2.91438
KENNY_CTNNB1_TARGETS_DN	-0.26013	0.0147413	-2.80993	0.0101561	0.0507303	-2.92522
KORKOLA_SEMINOMA_DN	0.306467	0.0236477	2.80981	0.0101589	0.0507303	-2.92547
DISTECHE_ESCAPED_FROM_X_INACTIVATION	-0.465692	-0.00978158	-2.80965	0.0101626	0.0507303	-2.92581
REACTOME_CONDENSATION_OF_PROPHASE_CHROMOSOMES	0.624745	0.0112384	2.80954	0.0101651	0.0507303	-2.92603
TSAI_RESPONSE_TO_RADIATION_THERAPY	-0.325664	0.0206056	-2.80906	0.0101763	0.0507303	-2.92703
PID_INTEGRIN_A9B1_PATHWAY	-0.345063	-0.0161289	-2.80878	0.0101826	0.0507303	-2.9276
KRASNOSELSKAYA_ILF3_TARGETS_UP	-0.362761	0.00178216	-2.80877	0.010183	0.0507303	-2.92763
NADERI_BREAST_CANCER_PROGNOSIS_UP	0.432189	0.00527432	2.80505	0.0102695	0.0511153	-2.93534
LIM_MAMMARY_STEM_CELL_UP	-0.241918	-0.00653681	-2.8031	0.0103152	0.0512766	-2.93937
ZWANG_DOWN_BY_2ND_EGF_PULSE	0.237315	-0.00726829	2.80287	0.0103206	0.0512766	-2.93985
JIANG_HYPOXIA_VIA_VHL	0.281328	-0.0120934	2.80222	0.0103359	0.0513065	-2.9412
REACTOME_INTERLEUKIN_12_FAMILY_SIGNALING	-0.276114	-0.00698499	-2.80178	0.0103463	0.0513116	-2.94211
HORIUCHI_WTAP_TARGETS_DN	0.381244	0.00714962	2.80085	0.0103683	0.0513743	-2.94405
CASORELLI_ACUTE_PROMYELOCYTIC_LEUKEMIA_UP	-0.247749	-0.00251031	-2.79884	0.0104157	0.0515296	-2.9482
KEGG_CHRONIC_MYELOID_LEUKEMIA	-0.244826	0.0243899	-2.79873	0.0104184	0.0515296	-2.94843
PID_FOXM1_PATHWAY	0.36446	0.0036307	2.79817	0.0104315	0.0515483	-2.94958
LEE_NAIVE_T_LYMPHOCYTE	-0.373444	0.0144955	-2.79628	0.0104765	0.0517241	-2.9535
HOFMANN_MYELODYSPLASTIC_SYNDROM_LOW_RISK_UP	-0.339245	-6.61301e-05	-2.79559	0.0104931	0.0517595	-2.95494
BIOCARTA_INTEGRIN_PATHWAY	-0.305731	-0.00685048	-2.79477	0.0105126	0.051774	-2.95662
GRYDER_PAX3FOXO1_ENHANCERS_KO_DOWN	-0.136924	0.00982006	-2.79468	0.0105148	0.051774	-2.95682
KEGG_HEDGEHOG_SIGNALING_PATHWAY	-0.208441	0.0100609	-2.79361	0.0105404	0.0518536	-2.95903
GARY_CD5_TARGETS_UP	-0.235475	-0.00670653	-2.79147	0.0105918	0.0520286	-2.96346
BIOCARTA_NO1_PATHWAY	-0.324025	-0.00136478	-2.79134	0.0105949	0.0520286	-2.96372
REACTOME_UNBLOCKING_OF_NMDA_RECEPTORS_GLUTAMATE_BINDING_AND_ACTIVATION	-0.313557	0.00845414	-2.79012	0.0106243	0.0521082	-2.96624
GOZGIT_ESR1_TARGETS_DN	-0.188385	0.00134549	-2.78988	0.0106301	0.0521082	-2.96674
PID_FGF_PATHWAY	-0.258278	-0.00213296	-2.78907	0.0106498	0.0521585	-2.96843
REACTOME_AQUAPORIN_MEDIATED_TRANSPORT	-0.240265	0.00225353	-2.78566	0.0107324	0.0525163	-2.97545
CHUANG_OXIDATIVE_STRESS_RESPONSE_UP	-0.314698	0.0108146	-2.78511	0.0107458	0.0525353	-2.97659
REACTOME_TRANSPORT_OF_THE_SLBP_DEPENDANT_MATURE_MRNA	0.433638	0.00538602	2.78453	0.0107602	0.0525585	-2.9778
BILANGES_SERUM_RESPONSE_TRANSLATION	-0.391824	0.00323526	-2.78276	0.0108035	0.0527234	-2.98146
SAKAI_TUMOR_INFILTRATING_MONOCYTES_UP	-0.356174	-0.00444223	-2.78187	0.0108253	0.0527251	-2.98329
ZHAN_MULTIPLE_MYELOMA_PR_DN	-0.251566	-0.0159191	-2.78171	0.0108291	0.0527251	-2.98361
BIOCARTA_GLEEVEC_PATHWAY	-0.347482	-0.00595618	-2.7812	0.0108418	0.0527251	-2.98468
PID_PLK1_PATHWAY	0.417533	0.00726166	2.78076	0.0108527	0.0527251	-2.98559
SCIAN_CELL_CYCLE_TARGETS_OF_TP53_AND_TP73_DN	0.578243	0.0255617	2.78067	0.0108548	0.0527251	-2.98576
KEGG_GLYCOSPHINGOLIPID_BIOSYNTHESIS_GLOBO_SERIES	-0.314054	-0.0258802	-2.78041	0.0108614	0.0527251	-2.98631
VANTVEER_BREAST_CANCER_METASTASIS_UP	-0.245063	0.0149698	-2.7798	0.0108762	0.0527506	-2.98756
REACTOME_VEGFR2_MEDIATED_VASCULAR_PERMEABILITY	-0.390264	0.0193793	-2.7792	0.0108911	0.0527761	-2.9888
YAO_TEMPORAL_RESPONSE_TO_PROGESTERONE_CLUSTER_17	0.31374	0.0221474	2.77755	0.0109321	0.0529284	-2.99222
PID_HIF2PATHWAY	-0.349655	0.00362866	-2.77626	0.0109642	0.0530369	-2.99488
KEGG_INTESTINAL_IMMUNE_NETWORK_FOR_IGA_PRODUCTION	-0.303493	-0.00252124	-2.77512	0.0109925	0.0530528	-2.99722
GUENTHER_GROWTH_SPHERICAL_VS_ADHERENT_DN	-0.298924	-0.00307265	-2.77473	0.0110023	0.0530528	-2.99803
REACTOME_MAPK_TARGETS_NUCLEAR_EVENTS_MEDIATED_BY_MAP_KINASES	-0.279111	0.00914386	-2.77459	0.0110057	0.0530528	-2.99832
REACTOME_DEVELOPMENTAL_BIOLOGY	-0.133594	0.00354414	-2.77458	0.011006	0.0530528	-2.99834
DORSAM_HOXA9_TARGETS_DN	-0.249901	0.00432593	-2.77371	0.0110278	0.053111	-3.00014
REACTOME_DNA_DAMAGE_RECOGNITION_IN_GG_NER	0.308864	0.00699615	2.76894	0.0111477	0.0536053	-3.00997
MARIADASON_RESPONSE_TO_BUTYRATE_CURCUMIN_SULINDAC_TSA_1	-0.36042	0.0132874	-2.76885	0.0111499	0.0536053	-3.01015
PID_AVB3_INTEGRIN_PATHWAY	-0.274552	-0.0124329	-2.76779	0.0111768	0.0536617	-3.01233
REACTOME_ERYTHROPOIETIN_ACTIVATES_STAT5	-0.536313	-0.0234049	-2.76762	0.0111811	0.0536617	-3.01269
REACTOME_REGULATION_OF_RUNX1_EXPRESSION_AND_ACTIVITY	-0.430756	0.0311881	-2.76629	0.0112149	0.0537671	-3.01543
LI_CYTIDINE_ANALOGS_CYCTOTOXICITY	0.351807	0.0101459	2.76598	0.0112227	0.0537671	-3.01606
HOQUE_METHYLATED_IN_CANCER	-0.226289	-0.0101477	-2.76554	0.0112338	0.0537736	-3.01696
REACTOME_TRISTETRAPROLIN_TTP_ZFP36_BINDS_AND_DESTABILIZES_MRNA	0.349418	0.0153538	2.76505	0.0112464	0.0537785	-3.01798
REACTOME_RESOLUTION_OF_D_LOOP_STRUCTURES	0.431349	0.0153314	2.76474	0.0112544	0.0537785	-3.01862
SCHAEFFER_SOX9_TARGETS_IN_PROSTATE_DEVELOPMENT_UP	-0.258645	0.0167238	-2.76311	0.0112958	0.0538676	-3.02196
BIOCARTA_TOB1_PATHWAY	-0.302936	-0.0100978	-2.76267	0.0113072	0.0538676	-3.02287
HARRIS_BRAIN_CANCER_PROGENITORS	-0.221441	0.00872982	-2.76265	0.0113077	0.0538676	-3.02291
REACTOME_NEGATIVE_REGULATORS_OF_DDX58_IFIH1_SIGNALING	-0.306728	-0.00373145	-2.76247	0.0113122	0.0538676	-3.02328
ROVERSI_GLIOMA_COPY_NUMBER_UP	0.263279	-0.00799974	2.76158	0.0113351	0.0539297	-3.02511
GAVIN_FOXP3_TARGETS_CLUSTER_P2	-0.191939	0.00496899	-2.75962	0.0113856	0.0539523	-3.02915
SCHAEFFER_PROSTATE_DEVELOPMENT_AND_CANCER_BOX2_DN	-0.317523	0.0316722	-2.75956	0.0113871	0.0539523	-3.02928
BONOME_OVARIAN_CANCER_SURVIVAL_SUBOPTIMAL_DEBULKING	-0.146835	-8.68409e-05	-2.75918	0.011397	0.0539523	-3.03006
BIOCARTA_PPARA_PATHWAY	-0.309902	-0.0253764	-2.75915	0.0113976	0.0539523	-3.03011
REACTOME_RAS_ACTIVATION_UPON_CA2PLUS_INFLUX_THROUGH_NMDA_RECEPTOR	-0.248769	0.00416626	-2.75913	0.0113983	0.0539523	-3.03016
REACTOME_GLYOXYLATE_METABOLISM_AND_GLYCINE_DEGRADATION	0.35157	-0.00212762	2.75906	0.0114	0.0539523	-3.0303
REACTOME_PYRIMIDINE_SALVAGE	-0.403299	0.0266597	-2.75865	0.0114107	0.0539523	-3.03115
REACTOME_GROWTH_HORMONE_RECEPTOR_SIGNALING	-0.368433	-0.0344603	-2.75835	0.0114183	0.0539523	-3.03175
BIOCARTA_IFNA_PATHWAY	-0.417474	0.0354369	-2.75765	0.0114365	0.0539787	-3.03321
CERVERA_SDHB_TARGETS_1_UP	-0.216084	-0.00297905	-2.75692	0.0114554	0.0539787	-3.03471
PID_CMYB_PATHWAY	-0.21444	0.00407598	-2.75656	0.0114648	0.0539787	-3.03545
BIOCARTA_NFKB_PATHWAY	-0.31883	0.000848538	-2.75655	0.0114651	0.0539787	-3.03547
REACTOME_APC_C:CDH1_MEDIATED_DEGRADATION_OF_CDC20_AND_OTHER_APC_C:CDH1_TARGETED_PROTEINS_IN_LATE_MITOSIS_EARLY_G1	0.415436	0.0220524	2.7559	0.0114818	0.0539787	-3.0368
CLAUS_PGR_POSITIVE_MENINGIOMA_DN	-0.322899	-0.0175454	-2.75587	0.0114827	0.0539787	-3.03687
LIU_PROSTATE_CANCER_DN	-0.249523	-0.00798724	-2.75388	0.0115344	0.0541381	-3.04095
WOTTON_RUNX_TARGETS_UP	-0.345332	-0.000718786	-2.75381	0.0115363	0.0541381	-3.0411
BOSCO_ALLERGEN_INDUCED_TH2_ASSOCIATED_MODULE	-0.181907	0.0188201	-2.7516	0.0115942	0.0543602	-3.04564
NUTT_GBM_VS_AO_GLIOMA_UP	-0.246106	-0.0164628	-2.75125	0.0116034	0.0543602	-3.04636
ZHAN_LATE_DIFFERENTIATION_GENES_UP	-0.287513	-0.00346436	-2.7505	0.0116231	0.054406	-3.0479
KOBAYASHI_EGFR_SIGNALING_6HR_UP	-0.544827	0.00139794	-2.74972	0.0116434	0.0544549	-3.04949
MEISSNER_NPC_HCP_WITH_H3K4ME3_AND_H3K27ME3	-0.200093	-0.00563494	-2.74923	0.0116566	0.05447	-3.05051
ZHAN_MULTIPLE_MYELOMA_HP_DN	-0.273286	0.0113119	-2.74852	0.0116752	0.0545092	-3.05196
VANLOO_SP3_TARGETS_DN	-0.226939	0.00830886	-2.74816	0.0116848	0.0545092	-3.05271
BREDEMEYER_RAG_SIGNALING_NOT_VIA_ATM_UP	-0.241745	0.0040495	-2.74771	0.0116968	0.0545188	-3.05364
SCHEIDEREIT_IKK_INTERACTING_PROTEINS	-0.196973	0.0190079	-2.74684	0.0117196	0.0545789	-3.0554
BIOCARTA_EOSINOPHILS_PATHWAY	-0.450866	-0.0405525	-2.74478	0.0117745	0.0547171	-3.05965
SHIN_B_CELL_LYMPHOMA_CLUSTER_3	-0.310537	0.0120147	-2.74475	0.0117752	0.0547171	-3.0597
BENPORATH_PROLIFERATION	0.463742	0.010534	2.74436	0.0117856	0.0547171	-3.06051
NATSUME_RESPONSE_TO_INTERFERON_BETA_UP	-0.206951	0.00434671	-2.74392	0.0117974	0.0547171	-3.06141
MURAKAMI_UV_RESPONSE_1HR_DN	-0.504947	0.0149615	-2.74386	0.011799	0.0547171	-3.06154
ONGUSAHA_TP53_TARGETS	-0.33158	-0.0106104	-2.7427	0.01183	0.0548144	-3.06391
PARK_OSTEOBLAST_DIFFERENTIATION_BY_PHENYLAMIL_DN	-0.426566	-0.0243303	-2.74084	0.0118796	0.0549981	-3.06771
GALLUZZI_PERMEABILIZE_MITOCHONDRIA	-0.254919	0.0138222	-2.74019	0.0118972	0.0550334	-3.06906
WNT_SIGNALING	-0.218265	0.00662863	-2.73858	0.0119406	0.0551876	-3.07236
MA_MYELOID_DIFFERENTIATION_UP	-0.262917	0.0120959	-2.73767	0.0119651	0.0552543	-3.07422
KEGG_LONG_TERM_POTENTIATION	-0.2408	0.00841159	-2.73697	0.0119842	0.055296	-3.07566
LIANG_SILENCED_BY_METHYLATION_DN	0.580441	0.0193083	2.7361	0.0120076	0.0553172	-3.07744
BIOCARTA_HIVNEF_PATHWAY	-0.241495	0.0145711	-2.73558	0.0120216	0.0553172	-3.0785
DAZARD_UV_RESPONSE_CLUSTER_G2	-0.301044	0.0120198	-2.73554	0.0120228	0.0553172	-3.07859
MYLLYKANGAS_AMPLIFICATION_HOT_SPOT_23	0.273421	0.0142352	2.73508	0.0120353	0.0553172	-3.07953
NADLER_OBESITY_UP	-0.368792	-0.0163344	-2.73494	0.012039	0.0553172	-3.07981
PEDERSEN_TARGETS_OF_611CTF_ISOFORM_OF_ERBB2	-0.279577	0.00520495	-2.73353	0.0120776	0.0554481	-3.08271
REACTOME_FANCONI_ANEMIA_PATHWAY	0.373981	0.0110634	2.73312	0.0120887	0.0554527	-3.08354
BIOCARTA_NOS1_PATHWAY	-0.375932	0.00640673	-2.73219	0.012114	0.0555226	-3.08544
REACTOME_HDL_ASSEMBLY	-0.38735	-0.0248793	-2.73143	0.0121348	0.0555714	-3.08699
IZADPANAH_STEM_CELL_ADIPOSE_VS_BONE_UP	-0.2466	-0.00272266	-2.73083	0.0121513	0.0556006	-3.08822
RAFFEL_VEGFA_TARGETS_DN	-0.397623	0.0571218	-2.72962	0.0121847	0.0557071	-3.09071
REACTOME_PURINE_RIBONUCLEOSIDE_MONOPHOSPHATE_BIOSYNTHESIS	0.434618	0.0528585	2.72831	0.0122205	0.0558246	-3.09338
REACTOME_ABORTIVE_ELONGATION_OF_HIV_1_TRANSCRIPT_IN_THE_ABSENCE_OF_TAT	0.375918	0.00561352	2.72789	0.0122323	0.0558319	-3.09425
PID_BETA_CATENIN_DEG_PATHWAY	-0.348811	-0.00665974	-2.72605	0.0122832	0.0559934	-3.09802
REACTOME_AKT_PHOSPHORYLATES_TARGETS_IN_THE_NUCLEUS	-0.499634	0.01676	-2.72587	0.012288	0.0559934	-3.09837
REACTOME_SIGNALING_BY_NOTCH1_IN_CANCER	-0.263937	0.0115663	-2.72246	0.0123828	0.0563788	-3.10534
DAVICIONI_MOLECULAR_ARMS_VS_ERMS_UP	-0.191523	-0.0045072	-2.72143	0.0124118	0.0564641	-3.10746
NUYTTEN_EZH2_TARGETS_DN	0.276821	0.00944428	2.7208	0.0124293	0.0564728	-3.10874
CARD_MIR302A_TARGETS	-0.269098	-0.000993816	-2.72062	0.0124343	0.0564728	-3.1091
GOZGIT_ESR1_TARGETS_UP	-0.203049	-0.00580463	-2.71857	0.0124919	0.056643	-3.11329
REACTOME_PRE_NOTCH_EXPRESSION_AND_PROCESSING	-0.263896	0.00535976	-2.7183	0.0124996	0.056643	-3.11385
GOBERT_OLIGODENDROCYTE_DIFFERENTIATION_UP	0.394099	0.0151934	2.71819	0.0125027	0.056643	-3.11407
GARGALOVIC_RESPONSE_TO_OXIDIZED_PHOSPHOLIPIDS_BROWN_UP	-0.380106	-0.00912731	-2.71712	0.012533	0.0567078	-3.11627
YAO_TEMPORAL_RESPONSE_TO_PROGESTERONE_CLUSTER_5	-0.247325	0.00459595	-2.71695	0.0125376	0.0567078	-3.1166
MCCABE_HOXC6_TARGETS_CANCER_DN	0.260661	0.00538842	2.71651	0.0125502	0.0567106	-3.11751
REACTOME_MEIOTIC_RECOMBINATION	0.486471	0.00657407	2.71568	0.0125737	0.0567106	-3.1192
PID_HDAC_CLASSIII_PATHWAY	-0.320164	-0.0114378	-2.7156	0.0125758	0.0567106	-3.11936
CAFFAREL_RESPONSE_TO_THC_24HR_3_DN	0.385358	0.00224167	2.71527	0.0125853	0.0567106	-3.12004
REACTOME_2_LTR_CIRCLE_FORMATION	0.498167	0.00623905	2.71511	0.0125898	0.0567106	-3.12036
ONO_FOXP3_TARGETS_UP	-0.325404	-0.00190341	-2.71267	0.012659	0.0569759	-3.12533
REACTOME_PROCESSING_OF_CAPPED_INTRON_CONTAINING_PRE_MRNA	0.362046	0.00792243	2.71173	0.0126859	0.05705	-3.12725
REACTOME_SIRT1_NEGATIVELY_REGULATES_RRNA_EXPRESSION	0.449851	0.00594008	2.71015	0.0127312	0.0572074	-3.13049
PID_NOTCH_PATHWAY	-0.201397	0.0123853	-2.70951	0.0127495	0.0572427	-3.13179
CHIARADONNA_NEOPLASTIC_TRANSFORMATION_CDC25_DN	-0.259403	-0.00299676	-2.70909	0.0127615	0.05725	-3.13264
WANG_SMARCE1_TARGETS_UP	-0.270545	-0.0121801	-2.70862	0.0127751	0.0572643	-3.13361
TOMLINS_PROSTATE_CANCER_DN	-0.290966	-0.0138389	-2.70769	0.0128018	0.057288	-3.13549
LY_AGING_MIDDLE_DN	0.623718	0.0693005	2.70754	0.0128062	0.057288	-3.13581
REACTOME_M_PHASE	0.356535	0.00635231	2.70706	0.01282	0.057288	-3.13678
BAKER_HEMATOPOESIS_STAT1_TARGETS	-0.342714	0.00209851	-2.70699	0.0128221	0.057288	-3.13693
ZWANG_CLASS_1_TRANSIENTLY_INDUCED_BY_EGF	-0.190896	0.00129295	-2.70657	0.0128342	0.0572953	-3.13778
HUTTMANN_B_CLL_POOR_SURVIVAL_UP	-0.225236	-0.00613633	-2.70512	0.0128762	0.0574365	-3.14075
REACTOME_MET_ACTIVATES_PTK2_SIGNALING	-0.297701	0.0022064	-2.70446	0.0128952	0.0574517	-3.14208
KOMMAGANI_TP63_GAMMA_TARGETS	-0.289958	0.00232697	-2.70428	0.0129005	0.0574517	-3.14245
PID_ERBB4_PATHWAY	-0.254327	0.00408924	-2.703	0.0129378	0.0575709	-3.14506
NAKAMURA_ADIPOGENESIS_EARLY_UP	-0.266801	-0.0131846	-2.70169	0.0129758	0.0576933	-3.14772
HOFFMANN_LARGE_TO_SMALL_PRE_BII_LYMPHOCYTE_UP	0.469594	0.019725	2.70088	0.0129995	0.0577523	-3.14938
NABA_MATRISOME_ASSOCIATED	-0.162032	-0.00188368	-2.69934	0.0130446	0.0579058	-3.15251
REACTOME_THE_NLRP3_INFLAMMASOME	-0.395674	0.00979251	-2.69611	0.0131397	0.0582811	-3.15909
RIGGINS_TAMOXIFEN_RESISTANCE_DN	-0.186755	-0.00961238	-2.69279	0.0132381	0.0586702	-3.16584
WUNDER_INFLAMMATORY_RESPONSE_AND_CHOLESTEROL_UP	-0.320422	-0.00480938	-2.69199	0.0132618	0.0586995	-3.16746
REACTOME_GABA_SYNTHESIS_RELEASE_REUPTAKE_AND_DEGRADATION	-0.372846	0.0322328	-2.69185	0.0132661	0.0586995	-3.16775
REACTOME_REGULATION_OF_MECP2_EXPRESSION_AND_ACTIVITY	-0.267138	0.00667977	-2.68839	0.0133694	0.0591091	-3.17477
BROWNE_INTERFERON_RESPONSIVE_GENES	-0.388105	-0.024586	-2.68762	0.0133928	0.0591296	-3.17635
YAMASHITA_LIVER_CANCER_STEM_CELL_DN	-0.199885	-0.0128916	-2.68731	0.013402	0.0591296	-3.17698
PANGAS_TUMOR_SUPPRESSION_BY_SMAD1_AND_SMAD5_UP	-0.237234	-0.0111958	-2.68692	0.0134137	0.0591296	-3.17777
REACTOME_APOPTOSIS_INDUCED_DNA_FRAGMENTATION	0.510197	-0.0109673	2.68681	0.013417	0.0591296	-3.17799
DUTTA_APOPTOSIS_VIA_NFKB	-0.299162	0.0103583	-2.68561	0.0134531	0.0591574	-3.18042
REACTOME_TRANSCRIPTIONAL_REGULATION_OF_PLURIPOTENT_STEM_CELLS	-0.283457	0.00167174	-2.68531	0.0134623	0.0591574	-3.18104
BAKER_HEMATOPOIESIS_STAT3_TARGETS	-0.324758	-0.00382443	-2.68517	0.0134665	0.0591574	-3.18132
REACTOME_RNA_POLYMERASE_III_TRANSCRIPTION_INITIATION_FROM_TYPE_3_PROMOTER	0.353861	-0.0153881	2.68486	0.013476	0.0591574	-3.18196
BYSTRYKH_HEMATOPOIESIS_STEM_CELL_RUNX1	-0.372473	0.00387355	-2.68482	0.0134771	0.0591574	-3.18203
CROONQUIST_IL6_DEPRIVATION_UP	-0.354115	-0.0237233	-2.68435	0.0134912	0.0591721	-3.18298
WONG_ADULT_TISSUE_STEM_MODULE	-0.209704	-0.00387592	-2.68318	0.0135267	0.0592351	-3.18536
FLORIO_NEOCORTEX_BASAL_RADIAL_GLIA_DN	0.479727	0.0266431	2.68317	0.0135271	0.0592351	-3.18538
GROSS_HYPOXIA_VIA_HIF1A_DN	-0.212019	0.0167332	-2.68257	0.0135454	0.0592679	-3.1866
PEDERSEN_METASTASIS_BY_ERBB2_ISOFORM_1	-0.353606	0.0319117	-2.68125	0.0135856	0.0593965	-3.18928
REACTOME_NOTCH_HLH_TRANSCRIPTION_PATHWAY	-0.327942	0.00723504	-2.68051	0.013608	0.059415	-3.19077
KANG_AR_TARGETS_DN	-0.307154	-0.0222955	-2.67998	0.0136243	0.059415	-3.19186
NUMATA_CSF3_SIGNALING_VIA_STAT3	-0.314462	0.0228276	-2.67983	0.0136287	0.059415	-3.19215
BIOCARTA_TCR_PATHWAY	-0.313012	-0.00644619	-2.67951	0.0136385	0.059415	-3.1928
BIOCARTA_RELA_PATHWAY	-0.309138	0.0176927	-2.67934	0.0136439	0.059415	-3.19315
CREIGHTON_ENDOCRINE_THERAPY_RESISTANCE_3	-0.171154	-0.00055327	-2.67846	0.0136707	0.0594851	-3.19494
LEIN_PONS_MARKERS	-0.240972	-0.00478308	-2.67767	0.013695	0.0595069	-3.19654
GEISS_RESPONSE_TO_DSRNA_UP	-0.277345	-0.00404303	-2.67759	0.0136974	0.0595069	-3.1967
TURJANSKI_MAPK1_AND_MAPK2_TARGETS	0.289168	0.0251691	2.677	0.0137156	0.0595388	-3.1979
BRACHAT_RESPONSE_TO_METHOTREXATE_UP	-0.327213	0.00551621	-2.67647	0.0137319	0.0595419	-3.19897
REACTOME_FBXL7_DOWN_REGULATES_AURKA_DURING_MITOTIC_ENTRY_AND_IN_EARLY_MITOSIS	0.396849	0.0268508	2.67627	0.0137379	0.0595419	-3.19937
WEBER_METHYLATED_HCP_IN_FIBROBLAST_UP	0.488692	-0.0329759	2.67536	0.013766	0.0596167	-3.20122
PID_INSULIN_PATHWAY	-0.333371	0.00915338	-2.67496	0.0137785	0.0596239	-3.20204
TAVOR_CEBPA_TARGETS_UP	-0.223919	-0.00608532	-2.6738	0.0138144	0.0597322	-3.20439
BIOCARTA_ACETAMINOPHEN_PATHWAY	-0.507663	0.0457917	-2.67213	0.0138661	0.0599086	-3.20777
KEGG_PROTEIN_EXPORT	0.328602	0.0065811	2.6666	0.0140389	0.0606073	-3.21896
MCGARVEY_SILENCED_BY_METHYLATION_IN_COLON_CANCER	-0.272734	-0.0177286	-2.66616	0.0140528	0.0606198	-3.21985
LEIN_MEDULLA_MARKERS	-0.253447	-1.78856e-05	-2.66339	0.0141402	0.0609492	-3.22546
MARZEC_IL2_SIGNALING_DN	-0.279452	-0.00589502	-2.66302	0.0141517	0.060951	-3.22619
ZHAN_MULTIPLE_MYELOMA_CD2_UP	-0.214302	-0.0138505	-2.66165	0.0141952	0.0610903	-3.22896
BOWIE_RESPONSE_TO_EXTRACELLULAR_MATRIX	-0.476164	-0.00691047	-2.66086	0.0142203	0.0611437	-3.23056
REACTOME_REGULATION_OF_MITOTIC_CELL_CYCLE	0.392581	0.0173942	2.66056	0.0142298	0.0611437	-3.23117
REACTOME_RNA_POLYMERASE_III_TRANSCRIPTION_INITIATION_FROM_TYPE_1_PROMOTER	0.323467	-0.000790443	2.65979	0.0142546	0.0612022	-3.23273
SATO_SILENCED_EPIGENETICALLY_IN_PANCREATIC_CANCER	-0.237782	-0.00111696	-2.65732	0.0143333	0.0614925	-3.23771
REACTOME_REGULATION_OF_PTEN_MRNA_TRANSLATION	-0.585605	0.0208365	-2.65653	0.0143587	0.0615534	-3.23931
REACTOME_VASOPRESSIN_REGULATES_RENAL_WATER_HOMEOSTASIS_VIA_AQUAPORINS	-0.240924	0.00340434	-2.65531	0.0143981	0.0616741	-3.24179
MOREAUX_B_LYMPHOCYTE_MATURATION_BY_TACI_UP	-0.288201	0.00660025	-2.65326	0.0144642	0.0619092	-3.24592
FUJII_YBX1_TARGETS_UP	-0.277114	-0.00627694	-2.65205	0.0145035	0.0620289	-3.24837
UDAYAKUMAR_MED1_TARGETS_DN	-0.217969	0.000640554	-2.65099	0.0145377	0.0621269	-3.2505
FERRARI_RESPONSE_TO_FENRETINIDE_DN	-0.544828	-0.00167002	-2.65036	0.014558	0.0621656	-3.25176
FOSTER_KDM1A_TARGETS_UP	-0.210326	-0.00773818	-2.64947	0.014587	0.062241	-3.25356
THUM_SYSTOLIC_HEART_FAILURE_UP	-0.180841	0.00215625	-2.6491	0.0145992	0.0622447	-3.25431
KIM_MYCN_AMPLIFICATION_TARGETS_DN	-0.208719	-0.0066398	-2.64718	0.0146621	0.0624053	-3.25819
REACTOME_ARMS_MEDIATED_ACTIVATION	-0.443093	0.0258493	-2.64693	0.0146703	0.0624053	-3.2587
BIOCARTA_HIF_PATHWAY	-0.431743	-0.0232293	-2.64691	0.0146709	0.0624053	-3.25874
REACTOME_INTERLEUKIN_17_SIGNALING	-0.235548	0.00628932	-2.64571	0.0147102	0.0625239	-3.26115
REACTOME_TRYPTOPHAN_CATABOLISM	0.346409	-0.000106816	2.64515	0.0147285	0.0625533	-3.26227
REACTOME_ACTIVATION_OF_APC_C_AND_APC_C:CDC20_MEDIATED_DEGRADATION_OF_MITOTIC_PROTEINS	0.40561	0.027497	2.64334	0.0147883	0.0627588	-3.26593
REACTOME_CHOLINE_CATABOLISM	-0.383104	-0.0262677	-2.64161	0.0148453	0.0629473	-3.2694
SAENZ_DETOX_PATHWAY_AND_CARCINOGENESIS_DN	-0.410372	0.0221977	-2.64114	0.014861	0.0629473	-3.27036
THUM_MIR21_TARGETS_HEART_DISEASE_DN	0.479927	-0.0406724	2.64096	0.014867	0.0629473	-3.27072
PASTURAL_RIZ1_TARGETS_UP	-0.391754	0.00872851	-2.63776	0.0149736	0.06335	-3.27717
REACTOME_LYSOSPHINGOLIPID_AND_LPA_RECEPTORS	-0.451775	-0.00787352	-2.63666	0.0150102	0.0634207	-3.27937
DIRMEIER_LMP1_RESPONSE_LATE_UP	-0.219692	-0.0106006	-2.63657	0.0150134	0.0634207	-3.27956
PETRETTO_CARDIAC_HYPERTROPHY	-0.265167	-0.00363808	-2.63508	0.0150631	0.0635542	-3.28254
PID_RETINOIC_ACID_PATHWAY	-0.260197	0.0203477	-2.63478	0.0150734	0.0635542	-3.28316
BILANGES_SERUM_SENSITIVE_GENES	-0.212781	0.00103677	-2.63459	0.0150797	0.0635542	-3.28353
PYEON_HPV_POSITIVE_TUMORS_DN	-0.445166	-0.00700987	-2.63376	0.0151076	0.0635657	-3.28521
ELLWOOD_MYC_TARGETS_UP	-0.347577	-0.0080489	-2.63332	0.0151223	0.0635657	-3.28608
THILLAINADESAN_ZNF217_TARGETS_UP	0.363095	-0.00288686	2.63326	0.0151247	0.0635657	-3.28622
TURJANSKI_MAPK14_TARGETS	-0.312306	0.0241439	-2.63306	0.0151312	0.0635657	-3.28661
PID_SMAD2_3NUCLEAR_PATHWAY	-0.238799	0.0179149	-2.63279	0.0151402	0.0635657	-3.28715
KRIEG_HYPOXIA_VIA_KDM3A	-0.277304	0.0114481	-2.63193	0.0151693	0.0636123	-3.28888
KEGG_GLYCOSPHINGOLIPID_BIOSYNTHESIS_GANGLIO_SERIES	-0.329333	-0.00607583	-2.63178	0.0151744	0.0636123	-3.28918
CHEN_HOXA5_TARGETS_6HR_UP	-0.377404	0.023708	-2.6306	0.0152145	0.0637319	-3.29157
YAO_TEMPORAL_RESPONSE_TO_PROGESTERONE_CLUSTER_3	-0.424542	0.036978	-2.62884	0.0152743	0.0639334	-3.2951
REACTOME_BH3_ONLY_PROTEINS_ASSOCIATE_WITH_AND_INACTIVATE_ANTI_APOPTOTIC_BCL_2_MEMBERS	-0.429337	-0.0186286	-2.6263	0.015361	0.0642475	-3.30021
YAGUE_PRETUMOR_DRUG_RESISTANCE_DN	-0.441191	-0.00880903	-2.62553	0.0153873	0.0643087	-3.30175
PID_NFAT_TFPATHWAY	-0.255138	0.0319724	-2.62477	0.0154134	0.0643686	-3.30327
BHAT_ESR1_TARGETS_NOT_VIA_AKT1_DN	-0.279782	-0.0094421	-2.62259	0.0154885	0.0646332	-3.30766
REACTOME_PROLONGED_ERK_ACTIVATION_EVENTS	-0.406148	0.0253122	-2.62119	0.0155368	0.0647857	-3.31046
PUJANA_BREAST_CANCER_WITH_BRCA1_MUTATED_UP	0.502484	0.0149886	2.62062	0.0155564	0.064788	-3.3116
BROWNE_HCMV_INFECTION_24HR_DN	-0.2194	-0.0128888	-2.62049	0.0155609	0.064788	-3.31186
JI_RESPONSE_TO_FSH_UP	-0.315454	-0.00997104	-2.61979	0.015585	0.0648103	-3.31326
MORI_MATURE_B_LYMPHOCYTE_DN	0.325265	0.0101082	2.61965	0.0155898	0.0648103	-3.31354
REACTOME_REGULATION_OF_HSF1_MEDIATED_HEAT_SHOCK_RESPONSE	0.251409	-0.00365791	2.61808	0.0156446	0.0649889	-3.3167
ODONNELL_TARGETS_OF_MYC_AND_TFRC_DN	0.504865	0.00895279	2.6174	0.0156682	0.0650377	-3.31805
WAKASUGI_HAVE_ZNF143_BINDING_SITES	0.36496	0.00682387	2.61653	0.0156985	0.0651145	-3.3198
PID_ANGIOPOIETIN_RECEPTOR_PATHWAY	-0.319566	0.0152759	-2.61076	0.0159012	0.0659055	-3.33136
ZHAN_MULTIPLE_MYELOMA_MF_UP	-0.27449	0.0101473	-2.61002	0.0159275	0.0659249	-3.33284
REACTOME_RUNX3_REGULATES_IMMUNE_RESPONSE_AND_CELL_MIGRATION	-0.387367	0.0346758	-2.6095	0.0159459	0.0659249	-3.33389
REACTOME_COMPETING_ENDOGENOUS_RNAS_CERNAS_REGULATE_PTEN_TRANSLATION	-0.581349	0.0188949	-2.60946	0.0159474	0.0659249	-3.33397
REACTOME_HDR_THROUGH_HOMOLOGOUS_RECOMBINATION_HRR	0.380735	0.00176723	2.60881	0.0159704	0.0659249	-3.33527
REACTOME_MRNA_SPLICING	0.353982	0.00820547	2.60877	0.0159717	0.0659249	-3.33534
KEGG_HISTIDINE_METABOLISM	0.193086	0.0190568	2.60837	0.0159861	0.0659249	-3.33615
YAGI_AML_FAB_MARKERS	-0.154067	5.02643e-05	-2.60819	0.0159925	0.0659249	-3.33651
KEGG_ALPHA_LINOLENIC_ACID_METABOLISM	0.275752	-0.0130311	2.60792	0.0160018	0.0659249	-3.33703
REACTOME_MITOCHONDRIAL_TRNA_AMINOACYLATION	0.360741	0.0214595	2.60654	0.0160512	0.066079	-3.33981
MIYAGAWA_TARGETS_OF_EWSR1_ETS_FUSIONS_DN	-0.214557	0.00170143	-2.60618	0.0160638	0.0660814	-3.34052
PID_ERBB1_INTERNALIZATION_PATHWAY	-0.266941	0.0130502	-2.60463	0.0161192	0.0661364	-3.34362
REACTOME_BETA_CATENIN_PHOSPHORYLATION_CASCADE	-0.340862	-0.00641346	-2.60445	0.0161258	0.0661364	-3.34399
REACTOME_NEURODEGENERATIVE_DISEASES	-0.250669	0.00995262	-2.60443	0.0161263	0.0661364	-3.34401
SIG_CD40PATHWAYMAP	-0.334524	-0.0116894	-2.60428	0.0161319	0.0661364	-3.34433
PID_ERBB2_ERBB3_PATHWAY	-0.267853	0.0172447	-2.60413	0.0161373	0.0661364	-3.34463
CHANG_POU5F1_TARGETS_UP	-0.365442	0.00370271	-2.60334	0.0161656	0.0662031	-3.34621
REACTOME_RESPIRATORY_ELECTRON_TRANSPORT	0.337424	-0.000612134	2.60293	0.0161804	0.0662143	-3.34703
BIOCARTA_IL3_PATHWAY	-0.333032	-0.00202575	-2.60211	0.0162097	0.0662851	-3.34866
REACTOME_HDR_THROUGH_MMEJ_ALT_NHEJ	0.581631	0.0293562	2.59835	0.0163455	0.0667908	-3.35617
REACTOME_PI3K_AKT_SIGNALING_IN_CANCER	-0.221505	0.000649881	-2.59699	0.0163949	0.066943	-3.35889
TURJANSKI_MAPK7_TARGETS	-0.408281	0.0391002	-2.59613	0.0164262	0.067021	-3.36061
KANG_IMMORTALIZED_BY_TERT_DN	-0.216171	0.00785276	-2.59349	0.0165226	0.0673052	-3.36587
YU_MYC_TARGETS_DN	-0.260924	-0.00363494	-2.59345	0.0165242	0.0673052	-3.36596
AMIT_EGF_RESPONSE_40_HELA	-0.339583	0.00287073	-2.59298	0.0165413	0.0673052	-3.36689
LU_TUMOR_ENDOTHELIAL_MARKERS_DN	-0.444586	0.0210336	-2.59238	0.0165633	0.0673052	-3.36808
HOLLERN_MICROACINAR_BREAST_TUMOR_DN	-0.354821	0.02161	-2.59222	0.0165692	0.0673052	-3.3684
KAAB_FAILED_HEART_VENTRICLE_DN	-0.208721	-0.00112702	-2.59222	0.0165693	0.0673052	-3.36841
MARKEY_RB1_ACUTE_LOF_UP	0.373972	0.01458	2.59101	0.0166137	0.0674357	-3.37082
TERAO_AOX4_TARGETS_HG_UP	-0.339549	-0.014373	-2.59016	0.0166452	0.0675046	-3.37252
MIKKELSEN_DEDIFFERENTIATED_STATE_DN	-0.539118	-0.0371891	-2.58937	0.0166744	0.0675046	-3.3741
HOWLIN_CITED1_TARGETS_1_UP	-0.227618	0.0108381	-2.58934	0.0166754	0.0675046	-3.37415
REACTOME_ABACAVIR_TRANSMEMBRANE_TRANSPORT	0.422344	0.0054003	2.58922	0.0166798	0.0675046	-3.37439
BROWNE_HCMV_INFECTION_14HR_UP	0.205588	-0.00256782	2.58845	0.0167083	0.0675702	-3.37592
WONG_MITOCHONDRIA_GENE_MODULE	0.292012	0.00475158	2.5878	0.0167326	0.0676188	-3.37723
REACTOME_SIGNALLING_TO_RAS	-0.326248	0.0310564	-2.58734	0.0167496	0.067638	-3.37815
BRUNO_HEMATOPOIESIS	-0.234382	0.00873633	-2.58595	0.0168011	0.0677961	-3.38091
GRUETZMANN_PANCREATIC_CANCER_UP	-0.163693	0.00981236	-2.58542	0.0168209	0.067826	-3.38197
REACTOME_REGULATION_OF_PLK1_ACTIVITY_AT_G2_M_TRANSITION	0.313984	-0.00469494	2.58415	0.0168682	0.067967	-3.38449
REACTOME_LONG_TERM_POTENTIATION	-0.304165	0.0126036	-2.58373	0.0168841	0.0679814	-3.38534
REACTOME_RRNA_MODIFICATION_IN_THE_MITOCHONDRION	0.609746	0.00976073	2.58267	0.0169237	0.0680424	-3.38745
REACTOME_PI_METABOLISM	-0.190519	-0.00566751	-2.58266	0.016924	0.0680424	-3.38746
REACTOME_PTK6_REGULATES_RHO_GTPASES_RAS_GTPASE_AND_MAP_KINASES	-0.268826	0.00349158	-2.58016	0.0170178	0.0683696	-3.39243
BURTON_ADIPOGENESIS_12	0.353482	-0.00785112	2.57946	0.0170442	0.0684256	-3.39383
PID_MET_PATHWAY	-0.224164	0.00801142	-2.57843	0.0170833	0.0685297	-3.39589
INAMURA_LUNG_CANCER_SCC_UP	0.530761	0.0263609	2.57812	0.017095	0.0685297	-3.39651
BHAT_ESR1_TARGETS_VIA_AKT1_UP	0.182691	-0.00538038	2.57763	0.0171134	0.0685316	-3.39747
MOREAUX_MULTIPLE_MYELOMA_BY_TACI_UP	-0.167408	-0.000242712	-2.57744	0.0171204	0.0685316	-3.39784
SA_PROGRAMMED_CELL_DEATH	-0.311743	-0.0091529	-2.57436	0.0172377	0.0689261	-3.40397
MUELLER_PLURINET	0.361111	0.0115509	2.57419	0.0172441	0.0689261	-3.40431
REACTOME_HOMOLOGOUS_DNA_PAIRING_AND_STRAND_EXCHANGE	0.414599	0.00424326	2.57339	0.0172745	0.0689977	-3.40589
CLIMENT_BREAST_CANCER_COPY_NUMBER_UP	-0.325859	0.0212015	-2.57264	0.0173032	0.0690153	-3.40739
ONDER_CDH1_TARGETS_2_UP	-0.210389	-0.00531236	-2.57262	0.017304	0.0690153	-3.40743
RHODES_UNDIFFERENTIATED_CANCER	0.466457	0.0112179	2.57157	0.0173443	0.0691258	-3.40952
FERRANDO_LYL1_NEIGHBORS	-0.399984	0.00914927	-2.57058	0.0173823	0.0692272	-3.41148
REACTOME_ACTIVATION_OF_MATRIX_METALLOPROTEINASES	-0.272627	-0.00871969	-2.56627	0.0175487	0.0698394	-3.42005
STARK_PREFRONTAL_CORTEX_22Q11_DELETION_DN	0.222333	0.00478989	2.56499	0.0175984	0.0699864	-3.42258
LEE_DIFFERENTIATING_T_LYMPHOCYTE	-0.209006	-0.00577363	-2.5635	0.0176564	0.0701663	-3.42554
LEE_EARLY_T_LYMPHOCYTE_UP	0.463414	0.01716	2.56244	0.0176979	0.0702803	-3.42765
REACTOME_METABOLISM_OF_RNA	0.30981	0.0119208	2.56184	0.017721	0.0703215	-3.42882
DAWSON_METHYLATED_IN_LYMPHOMA_TCL1	-0.223384	0.00867406	-2.56134	0.0177407	0.0703487	-3.42982
REACTOME_MITOTIC_SPINDLE_CHECKPOINT	0.359323	0.00560383	2.56045	0.0177754	0.0704356	-3.43157
LY_AGING_MIDDLE_UP	-0.40018	-0.00644351	-2.55965	0.017807	0.0705102	-3.43317
REACTOME_CALCINEURIN_ACTIVATES_NFAT	-0.37807	0.00256874	-2.55879	0.0178408	0.070593	-3.43487
YIH_RESPONSE_TO_ARSENITE_C2	-0.278769	0.000956924	-2.55824	0.0178624	0.0706212	-3.43596
REACTOME_INTERLEUKIN_37_SIGNALING	-0.265372	0.0200184	-2.55796	0.0178736	0.0706212	-3.43652
NGUYEN_NOTCH1_TARGETS_UP	-0.305457	0.0065383	-2.55717	0.0179047	0.0706513	-3.43808
GRANDVAUX_IFN_RESPONSE_NOT_VIA_IRF3	-0.442208	-0.0444522	-2.55711	0.0179069	0.0706513	-3.43819
PID_ANTHRAX_PATHWAY	-0.271809	-0.0206671	-2.5567	0.0179232	0.070665	-3.43901
LU_TUMOR_ENDOTHELIAL_MARKERS_UP	-0.302863	-0.00388261	-2.55601	0.0179506	0.0707222	-3.44038
VERRECCHIA_RESPONSE_TO_TGFB1_C1	-0.29856	0.0254862	-2.55397	0.0180315	0.0709472	-3.44442
PID_CD8_TCR_PATHWAY	-0.197178	0.00321615	-2.55386	0.0180359	0.0709472	-3.44463
BIOCARTA_MELANOCYTE_PATHWAY	-0.502029	0.000720015	-2.55348	0.0180512	0.0709472	-3.4454
VANTVEER_BREAST_CANCER_BRCA1_DN	-0.29607	0.00082875	-2.55327	0.0180593	0.0709472	-3.4458
WIKMAN_ASBESTOS_LUNG_CANCER_DN	-0.313652	0.0144542	-2.55294	0.0180725	0.0709484	-3.44646
ASTIER_INTEGRIN_SIGNALING	-0.155384	0.0112695	-2.55223	0.0181008	0.0709543	-3.44786
SANSOM_APC_TARGETS_DN	-0.171384	-0.00462883	-2.55203	0.0181086	0.0709543	-3.44825
PID_EPHB_FWD_PATHWAY	-0.248373	0.0104046	-2.55193	0.0181127	0.0709543	-3.44845
HAN_JNK_SINGALING_DN	-0.270949	-0.0152977	-2.54876	0.0182399	0.071376	-3.45473
YAO_TEMPORAL_RESPONSE_TO_PROGESTERONE_CLUSTER_0	-0.285664	-0.0132164	-2.5486	0.0182463	0.071376	-3.45504
MIKKELSEN_IPS_LCP_WITH_H3K4ME3	-0.171769	-0.0208623	-2.54807	0.0182677	0.0714088	-3.4561
GAUSSMANN_MLL_AF4_FUSION_TARGETS_G_UP	-0.147048	-0.0052357	-2.54771	0.018282	0.0714119	-3.4568
SHI_SPARC_TARGETS_DN	-0.307621	-0.00571244	-2.5474	0.0182944	0.0714119	-3.45741
BURTON_ADIPOGENESIS_1	-0.305661	-0.0075338	-2.54695	0.0183128	0.071433	-3.45831
MEISSNER_BRAIN_HCP_WITH_H3_UNMETHYLATED	-0.25462	0.0092983	-2.54638	0.0183358	0.0714718	-3.45943
EBAUER_TARGETS_OF_PAX3_FOXO1_FUSION_DN	-0.208242	0.00441342	-2.5453	0.0183793	0.0714755	-3.46156
GRAHAM_CML_DIVIDING_VS_NORMAL_QUIESCENT_UP	0.439472	0.00895336	2.54525	0.0183813	0.0714755	-3.46166
REACTOME_E2F_ENABLED_INHIBITION_OF_PRE_REPLICATION_COMPLEX_FORMATION	0.521992	0.0265364	2.54506	0.0183892	0.0714755	-3.46205
VALK_AML_CLUSTER_15	-0.21971	0.028437	-2.54487	0.0183966	0.0714755	-3.4624
REACTOME_ION_HOMEOSTASIS	-0.247619	-0.000499831	-2.54445	0.0184138	0.0714755	-3.46324
BIOCARTA_PYK2_PATHWAY	-0.402568	-0.000928596	-2.54443	0.0184147	0.0714755	-3.46329
NABA_COLLAGENS	-0.323666	-0.0203027	-2.53771	0.018689	0.0724379	-3.47655
REACTOME_COLLAGEN_CHAIN_TRIMERIZATION	-0.323666	-0.0203027	-2.53771	0.018689	0.0724379	-3.47655
REACTOME_ACTIVATION_OF_BAD_AND_TRANSLOCATION_TO_MITOCHONDRIA	-0.328597	0.0313896	-2.5371	0.0187139	0.0724833	-3.47774
GROSS_HYPOXIA_VIA_ELK3_ONLY_DN	-0.200035	0.00854548	-2.53329	0.0188714	0.0730421	-3.48526
PASINI_SUZ12_TARGETS_UP	-0.18503	0.00228534	-2.53284	0.0188902	0.073054	-3.48615
NGUYEN_NOTCH1_TARGETS_DN	-0.188278	0.00956551	-2.53258	0.0189011	0.073054	-3.48667
SCHLOSSER_SERUM_RESPONSE_UP	-0.195834	0.00515469	-2.53173	0.0189364	0.0731391	-3.48834
CHANG_IMMORTALIZED_BY_HPV31_DN	-0.275734	-0.00741688	-2.53091	0.0189703	0.0732189	-3.48995
YAO_HOXA10_TARGETS_VIA_PROGESTERONE_UP	-0.228408	0.00209611	-2.53035	0.0189938	0.073258	-3.49105
REACTOME_TRANSLESION_SYNTHESIS_BY_POLH	0.351443	0.00228371	2.52957	0.0190265	0.0733329	-3.4926
REACTOME_RHO_GTPASE_CYCLE	-0.155527	0.000304018	-2.52803	0.019091	0.073528	-3.49563
TAKEDA_TARGETS_OF_NUP98_HOXA9_FUSION_10D_UP	-0.220552	-0.00394135	-2.52772	0.0191039	0.073528	-3.49623
REACTOME_CREB1_PHOSPHORYLATION_THROUGH_THE_ACTIVATION_OF_ADENYLATE_CYCLASE	-0.395267	-0.0373857	-2.52695	0.0191361	0.0735692	-3.49774
DAIRKEE_CANCER_PRONE_RESPONSE_BPA	0.275382	0.010359	2.52673	0.0191454	0.0735692	-3.49818
LEONARD_HYPOXIA	-0.363922	0.0201915	-2.52651	0.0191547	0.0735692	-3.49862
REACTOME_ELASTIC_FIBRE_FORMATION	-0.306273	-0.021023	-2.52473	0.0192299	0.0738062	-3.50212
REACTOME_CA_DEPENDENT_EVENTS	-0.249106	-0.00640228	-2.52374	0.0192717	0.073915	-3.50407
REACTOME_TRANSMISSION_ACROSS_ELECTRICAL_SYNAPSES	-0.618193	0.0298273	-2.52085	0.0193944	0.074334	-3.50976
ZHENG_FOXP3_TARGETS_UP	-0.241581	0.0196016	-2.5199	0.0194349	0.0744373	-3.51162
PID_FOXO_PATHWAY	-0.339988	0.0124254	-2.5194	0.0194561	0.0744434	-3.5126
REACTOME_REGULATION_OF_KIT_SIGNALING	-0.302789	-0.00313152	-2.51899	0.0194734	0.0744434	-3.5134
REACTOME_SUMOYLATION_OF_RNA_BINDING_PROTEINS	0.344513	0.00965751	2.51891	0.0194771	0.0744434	-3.51357
LINDGREN_BLADDER_CANCER_CLUSTER_3_UP	0.321017	0.000435859	2.51813	0.0195103	0.0745186	-3.51509
REACTOME_RECYCLING_OF_BILE_ACIDS_AND_SALTS	-0.250651	0.00115869	-2.51258	0.0197492	0.0753637	-3.52599
MARTENS_BOUND_BY_PML_RARA_FUSION	-0.160081	-0.00143211	-2.51235	0.019759	0.0753637	-3.52643
GRADE_COLON_AND_RECTAL_CANCER_DN	-0.187025	-0.0058937	-2.51178	0.019784	0.0754066	-3.52756
TRAYNOR_RETT_SYNDROM_DN	-0.352085	-0.0120765	-2.51078	0.0198271	0.0755188	-3.52951
BIOCARTA_NFAT_PATHWAY	-0.242929	0.00560836	-2.50931	0.0198912	0.0757105	-3.5324
BIOCARTA_ALK_PATHWAY	-0.200078	0.00458189	-2.50697	0.0199935	0.076047	-3.53699
ROYLANCE_BREAST_CANCER_16Q_COPY_NUMBER_DN	0.260653	-0.00991578	2.50644	0.0200167	0.076083	-3.53803
BOYAULT_LIVER_CANCER_SUBCLASS_G3_UP	0.359621	0.00269694	2.50514	0.0200736	0.0762318	-3.54057
REACTOME_INTERFERON_SIGNALING	-0.205913	-0.00405426	-2.50477	0.0200898	0.0762318	-3.5413
REACTOME_UBIQUINOL_BIOSYNTHESIS	0.495134	0.0308656	2.5046	0.0200975	0.0762318	-3.54163
NEMETH_INFLAMMATORY_RESPONSE_LPS_UP	-0.252421	-0.00216369	-2.50362	0.0201408	0.0763435	-3.54356
SUNG_METASTASIS_STROMA_UP	-0.203207	0.0138805	-2.50265	0.0201833	0.0764379	-3.54545
MIKKELSEN_IPS_ICP_WITH_H3K4ME3_AND_H327ME3	-0.167426	0.00282312	-2.50223	0.0202022	0.0764379	-3.54629
REACTOME_NON_INTEGRIN_MEMBRANE_ECM_INTERACTIONS	-0.315664	-0.0132641	-2.50211	0.0202074	0.0764379	-3.54652
BIOCARTA_P35ALZHEIMERS_PATHWAY	-0.300476	0.000706632	-2.49945	0.0203253	0.0768312	-3.55172
MIKKELSEN_MEF_HCP_WITH_H3K27ME3	-0.155231	0.00927234	-2.49731	0.0204206	0.0770729	-3.5559
GARGALOVIC_RESPONSE_TO_OXIDIZED_PHOSPHOLIPIDS_LIGHTYELLOW_UP	-0.253381	-0.00390364	-2.4971	0.0204301	0.0770729	-3.55632
HENDRICKS_SMARCA4_TARGETS_UP	-0.300453	0.00212071	-2.49707	0.0204313	0.0770729	-3.55637
FOURNIER_ACINAR_DEVELOPMENT_EARLY_UP	-0.390919	-0.00708993	-2.49563	0.0204959	0.0772634	-3.55919
SASAI_RESISTANCE_TO_NEOPLASTIC_TRANSFROMATION	-0.35087	-0.00918455	-2.4951	0.0205196	0.0773	-3.56023
KIM_WT1_TARGETS_8HR_UP	-0.225884	0.00748891	-2.49453	0.0205452	0.0773433	-3.56134
PID_VEGF_VEGFR_PATHWAY	-0.410483	-0.0231087	-2.49382	0.0205771	0.0773911	-3.56273
TSENG_ADIPOGENIC_POTENTIAL_UP	-0.321007	0.0116493	-2.49362	0.020586	0.0773911	-3.56312
BIOCARTA_BLYMPHOCYTE_PATHWAY	-0.465983	0.01616	-2.49217	0.0206513	0.0775835	-3.56595
REACTOME_NEGATIVE_REGULATION_OF_NOTCH4_SIGNALING	0.393809	0.0187407	2.49166	0.0206742	0.0776164	-3.56694
VANDESLUIS_COMMD1_TARGETS_GROUP_3_UP	-0.169025	-0.00705336	-2.49052	0.0207257	0.0777569	-3.56917
KEGG_VEGF_SIGNALING_PATHWAY	-0.212193	0.00986411	-2.48794	0.0208429	0.0780966	-3.5742
ZHANG_BREAST_CANCER_PROGENITORS_DN	-0.152395	0.00523309	-2.4879	0.0208447	0.0780966	-3.57428
REACTOME_FATTY_ACIDS_BOUND_TO_GPR40_FFAR1_REGULATE_INSULIN_SECRETION	-0.427134	0.0547409	-2.48674	0.0208979	0.0782426	-3.57656
FEVR_CTNNB1_TARGETS_DN	0.313889	0.0101294	2.48561	0.0209496	0.0783828	-3.57877
STAMBOLSKY_TARGETS_OF_MUTATED_TP53_DN	-0.263986	-0.00717843	-2.48423	0.0210124	0.0785644	-3.58144
PASTURAL_RIZ1_TARGETS_DN	-0.486373	-0.0273954	-2.48318	0.021061	0.0786736	-3.58351
KEGG_INSULIN_SIGNALING_PATHWAY	-0.25057	-0.00713399	-2.48297	0.0210702	0.0786736	-3.5839
LI_INDUCED_T_TO_NATURAL_KILLER_DN	-0.196667	0.00221486	-2.48194	0.021118	0.0787984	-3.58592
BIOCARTA_FBW7_PATHWAY	0.295137	0.0449856	2.48119	0.0211525	0.0788736	-3.58738
KEGG_VIRAL_MYOCARDITIS	-0.260961	-0.0098374	-2.48025	0.0211959	0.0789475	-3.58921
AFFAR_YY1_TARGETS_UP	-0.169912	0.00663172	-2.47998	0.0212084	0.0789475	-3.58974
REACTOME_HOST_INTERACTIONS_OF_HIV_FACTORS	0.300597	0.0170724	2.47983	0.0212154	0.0789475	-3.59003
FLOTHO_PEDIATRIC_ALL_THERAPY_RESPONSE_UP	-0.262527	0.00755067	-2.47934	0.0212378	0.0789774	-3.59097
PID_ILK_PATHWAY	-0.220518	0.00253701	-2.47856	0.021274	0.0790589	-3.5925
KEGG_TYROSINE_METABOLISM	0.236749	0.019244	2.47805	0.0212979	0.0790943	-3.5935
BIOCARTA_GPCR_PATHWAY	-0.328071	-0.00521696	-2.4757	0.0214073	0.0794467	-3.59807
STOSSI_RESPONSE_TO_ESTRADIOL	-0.248098	-0.00664019	-2.47475	0.0214514	0.0795569	-3.59991
NAKAMURA_METASTASIS	-0.217104	0.0140031	-2.47347	0.0215113	0.079725	-3.6024
HOEBEKE_LYMPHOID_STEM_CELL_UP	-0.262795	-0.00218524	-2.47231	0.0215657	0.079873	-3.60466
REACTOME_INTEGRATION_OF_ENERGY_METABOLISM	-0.183165	-0.0025991	-2.4716	0.0215993	0.0799435	-3.60605
BIOCARTA_CXCR4_PATHWAY	-0.338675	-0.0153112	-2.47076	0.0216388	0.0800359	-3.60768
PID_SYNDECAN_3_PATHWAY	-0.400656	-0.00726668	-2.46906	0.021719	0.0802784	-3.61098
NAM_FXYD5_TARGETS_DN	0.300404	0.0139372	2.46562	0.0218824	0.0807955	-3.61767
ROZANOV_MMP14_TARGETS_UP	-0.184436	-0.00063198	-2.4655	0.0218882	0.0807955	-3.61791
REACTOME_PASSIVE_TRANSPORT_BY_AQUAPORINS	-0.28316	-0.000465816	-2.4647	0.0219261	0.0808811	-3.61945
HOFFMANN_IMMATURE_TO_MATURE_B_LYMPHOCYTE_UP	-0.223257	0.000246147	-2.46432	0.0219443	0.0808938	-3.62019
BIOCARTA_PTC1_PATHWAY	0.48041	0.0179651	2.46244	0.0220345	0.0811719	-3.62385
SERVITJA_ISLET_HNF1A_TARGETS_UP	-0.206702	-0.00313453	-2.46209	0.0220509	0.0811782	-3.62452
GRAESSMANN_RESPONSE_TO_MC_AND_DOXORUBICIN_UP	-0.143473	0.000408457	-2.46103	0.0221017	0.0813107	-3.62657
HELLER_HDAC_TARGETS_DN	-0.180791	0.0114902	-2.45834	0.0222317	0.0817341	-3.6318
LINDGREN_BLADDER_CANCER_CLUSTER_2A_UP	-0.325371	-0.00575703	-2.45714	0.0222895	0.0818789	-3.63412
SANA_RESPONSE_TO_IFNG_UP	-0.3379	-0.0235457	-2.45691	0.0223008	0.0818789	-3.63457
MCBRYAN_PUBERTAL_BREAST_6_7WK_UP	-0.217527	-0.0040094	-2.45572	0.0223585	0.0820357	-3.63687
SIMBULAN_UV_RESPONSE_NORMAL_UP	-0.425027	-0.0171837	-2.45474	0.0224062	0.0821189	-3.63877
REACTOME_CELLULAR_RESPONSE_TO_HEAT_STRESS	0.222792	-0.0052806	2.45445	0.0224203	0.0821189	-3.63933
HASLINGER_B_CLL_WITH_MUTATED_VH_GENES	0.275332	0.00302304	2.45434	0.0224259	0.0821189	-3.63956
KOBAYASHI_EGFR_SIGNALING_24HR_UP	-0.332781	-0.0104018	-2.45319	0.0224815	0.0822678	-3.64176
WINNEPENNINCKX_MELANOMA_METASTASIS_UP	0.446269	0.0242633	2.45141	0.0225687	0.0825318	-3.64521
BREDEMEYER_RAG_SIGNALING_VIA_ATM_NOT_VIA_NFKB_DN	0.228319	-0.00453574	2.4498	0.0226478	0.0827659	-3.64833
NAKAMURA_METASTASIS_MODEL_UP	-0.245671	0.0133613	-2.44633	0.0228193	0.0832865	-3.65506
REACTOME_RIP_MEDIATED_NFKB_ACTIVATION_VIA_ZBP1	-0.332597	-0.00516234	-2.4463	0.0228205	0.0832865	-3.6551
REACTOME_SIGNALING_BY_NOTCH1	-0.231003	0.00802747	-2.44582	0.0228445	0.083319	-3.65604
REACTOME_THE_CITRIC_ACID_TCA_CYCLE_AND_RESPIRATORY_ELECTRON_TRANSPORT	0.262968	0.0102183	2.44461	0.0229046	0.0834782	-3.65838
KEGG_ECM_RECEPTOR_INTERACTION	-0.245652	-0.0128235	-2.44409	0.0229304	0.0834782	-3.65938
FINETTI_BREAST_CANCERS_KINOME_GRAY	-0.364289	0.010113	-2.44402	0.0229337	0.0834782	-3.65951
KEGG_PRIMARY_BILE_ACID_BIOSYNTHESIS	-0.324602	-0.00592014	-2.44282	0.0229935	0.0836169	-3.66183
YAGI_AML_WITH_11Q23_REARRANGED	-0.137266	-0.00298404	-2.44215	0.0230268	0.0836169	-3.66312
DAVIES_MULTIPLE_MYELOMA_VS_MGUS_DN	-0.407195	-0.0208166	-2.44197	0.0230359	0.0836169	-3.66348
REACTOME_TYSND1_CLEAVES_PEROXISOMAL_PROTEINS	-0.455843	-0.0425635	-2.44195	0.023037	0.0836169	-3.66352
ROVERSI_GLIOMA_LOH_REGIONS	0.198509	0.00885909	2.44173	0.0230479	0.0836169	-3.66394
FARMER_BREAST_CANCER_APOCRINE_VS_LUMINAL	-0.139665	-0.000694978	-2.44111	0.0230788	0.0836741	-3.66513
LEE_AGING_CEREBELLUM_UP	-0.190787	0.001638	-2.44035	0.023117	0.0837573	-3.66661
CHEOK_RESPONSE_TO_HD_MTX_UP	-0.312918	0.00126743	-2.43994	0.0231374	0.0837759	-3.66739
GUTIERREZ_CHRONIC_LYMPHOCYTIC_LEUKEMIA_DN	-0.227091	-0.00682304	-2.43943	0.0231632	0.0838143	-3.66838
MARTENS_TRETINOIN_RESPONSE_UP	-0.148682	0.00744606	-2.43858	0.0232059	0.0839133	-3.67002
ABE_VEGFA_TARGETS	-0.299946	-0.00276655	-2.43814	0.0232281	0.0839387	-3.67088
MCMURRAY_TP53_HRAS_COOPERATION_RESPONSE_DN	-0.213271	0.000669839	-2.43704	0.0232835	0.0840834	-3.673
GARCIA_TARGETS_OF_FLI1_AND_DAX1_DN	0.331391	0.00638563	2.43521	0.0233759	0.0843379	-3.67652
KEGG_CELL_ADHESION_MOLECULES_CAMS	-0.181196	-0.00640636	-2.43504	0.0233846	0.0843379	-3.67686
MCBRYAN_PUBERTAL_BREAST_5_6WK_UP	-0.1635	0.00929217	-2.43473	0.0234	0.0843382	-3.67744
ZHOU_TNF_SIGNALING_4HR	-0.203723	0.00352272	-2.43327	0.0234744	0.0845508	-3.68027
REACTOME_FORMATION_OF_INCISION_COMPLEX_IN_GG_NER	0.252655	0.0129991	2.43103	0.0235882	0.0849052	-3.68457
FONTAINE_THYROID_TUMOR_UNCERTAIN_MALIGNANCY_UP	-0.182856	-0.0128104	-2.42978	0.0236525	0.0850448	-3.687
ROETH_TERT_TARGETS_UP	-0.263857	0.00998936	-2.42958	0.0236625	0.0850448	-3.68737
LU_TUMOR_VASCULATURE_DN	-0.379972	0.0168514	-2.42937	0.0236734	0.0850448	-3.68778
FOURNIER_ACINAR_DEVELOPMENT_LATE_2	0.377537	0.0102366	2.42759	0.0237647	0.0852845	-3.69121
BIOCARTA_ARENRF2_PATHWAY	-0.272786	-0.00650297	-2.42747	0.0237711	0.0852845	-3.69145
DUTERTRE_ESTRADIOL_RESPONSE_24HR_UP	0.412937	0.0113208	2.42677	0.0238068	0.0853567	-3.69278
PID_HDAC_CLASSII_PATHWAY	-0.274207	0.00052628	-2.42605	0.023844	0.0854345	-3.69417
REACTOME_MITOTIC_METAPHASE_AND_ANAPHASE	0.343061	0.00924833	2.42487	0.023905	0.0855972	-3.69645
BIOCARTA_MYOSIN_PATHWAY	-0.321258	-0.00364781	-2.42368	0.0239664	0.0857612	-3.69873
UZONYI_RESPONSE_TO_LEUKOTRIENE_AND_THROMBIN	-0.353333	-0.0168065	-2.4221	0.0240486	0.0859462	-3.70177
LEE_TARGETS_OF_PTCH1_AND_SUFU_UP	-0.253142	-0.0154064	-2.42191	0.0240583	0.0859462	-3.70213
GAVIN_FOXP3_TARGETS_CLUSTER_P6	0.348483	0.00938362	2.42178	0.0240649	0.0859462	-3.70238
REACTOME_AURKA_ACTIVATION_BY_TPX2	0.344768	-0.00355789	2.4195	0.0241842	0.0862735	-3.70678
BIOCARTA_CTLA4_PATHWAY	-0.324418	-0.0129555	-2.41942	0.024188	0.0862735	-3.70692
LEE_BMP2_TARGETS_DN	0.301114	0.00404586	2.41898	0.024211	0.0862918	-3.70776
KORKOLA_EMBRYONIC_CARCINOMA_VS_SEMINOMA_UP	-0.239588	0.0130642	-2.41873	0.0242245	0.0862918	-3.70826
KIM_MYC_AMPLIFICATION_TARGETS_DN	-0.196697	0.00242448	-2.41708	0.0243109	0.0865436	-3.71142
WU_APOPTOSIS_BY_CDKN1A_NOT_VIA_TP53	0.44868	0.0209738	2.41635	0.0243489	0.0866227	-3.71281
JI_METASTASIS_REPRESSED_BY_STK11	-0.262259	-0.0148377	-2.41606	0.0243646	0.0866227	-3.71339
PECE_MAMMARY_STEM_CELL_DN	-0.241883	-0.000669515	-2.41302	0.0245248	0.0871358	-3.71921
BIOCARTA_AGPCR_PATHWAY	-0.3884	0.00213483	-2.41192	0.0245833	0.0872698	-3.72133
GROSS_HIF1A_TARGETS_DN	-0.342594	0.00816739	-2.41171	0.0245942	0.0872698	-3.72173
RUIZ_TNC_TARGETS_UP	-0.300477	-0.0257647	-2.40964	0.0247042	0.0876036	-3.72569
BIOCARTA_GATA3_PATHWAY	-0.30255	0.0151186	-2.4091	0.0247329	0.0876488	-3.72672
PUJANA_CHEK2_PCC_NETWORK	0.341607	0.00970249	2.40839	0.0247708	0.0877265	-3.72808
XU_HGF_TARGETS_INDUCED_BY_AKT1_6HR	-0.319162	0.0416606	-2.40767	0.0248097	0.087759	-3.72948
GREENBAUM_E2A_TARGETS_DN	-0.250135	-0.0171664	-2.40713	0.0248384	0.087759	-3.73051
DELYS_THYROID_CANCER_DN	-0.159377	-0.00171795	-2.40704	0.0248433	0.087759	-3.73068
WANG_METASTASIS_OF_BREAST_CANCER_ESR1_UP	0.476394	0.021655	2.40703	0.0248438	0.087759	-3.7307
REACTOME_PROTEIN_PROTEIN_INTERACTIONS_AT_SYNAPSES	-0.225105	0.0134723	-2.40669	0.0248618	0.0877663	-3.73134
PID_TGFBR_PATHWAY	-0.168723	0.0062036	-2.40623	0.0248868	0.0877981	-3.73224
TAKEDA_TARGETS_OF_NUP98_HOXA9_FUSION_16D_UP	-0.180736	0.00813757	-2.40483	0.0249616	0.0880058	-3.7349
BIOCARTA_DEATH_PATHWAY	-0.198182	0.00345292	-2.40351	0.0250332	0.0881679	-3.73745
COATES_MACROPHAGE_M1_VS_M2_UP	-0.187249	0.00899867	-2.4032	0.0250495	0.0881679	-3.73803
LEIN_MIDBRAIN_MARKERS	-0.178853	-0.00644574	-2.40309	0.0250557	0.0881679	-3.73825
KREPPEL_CD99_TARGETS_DN	-0.394261	0.00641776	-2.40208	0.0251104	0.0883037	-3.74018
REACTOME_PERVASIVE_DEVELOPMENTAL_DISORDERS	-0.235261	-0.0100109	-2.40169	0.0251311	0.0883203	-3.74092
REACTOME_UNFOLDED_PROTEIN_RESPONSE_UPR	0.220061	0.018832	2.40031	0.0252063	0.0885277	-3.74357
CHEN_HOXA5_TARGETS_9HR_DN	0.266924	0.000944422	2.39883	0.0252868	0.0887541	-3.7464
WU_CELL_MIGRATION	-0.169343	0.0059695	-2.39822	0.0253197	0.0888129	-3.74756
REACTOME_HIV_LIFE_CYCLE	0.271601	0.00144395	2.3976	0.0253536	0.0888748	-3.74874
REACTOME_FORMATION_OF_THE_EARLY_ELONGATION_COMPLEX	0.329084	0.00597207	2.39606	0.0254382	0.0890676	-3.7517
GARGALOVIC_RESPONSE_TO_OXIDIZED_PHOSPHOLIPIDS_LIGHTGREEN_DN	-0.386997	0.010683	-2.396	0.025441	0.0890676	-3.7518
REACTOME_AUF1_HNRNP_D0_BINDS_AND_DESTABILIZES_MRNA	0.40236	0.0268554	2.39478	0.0255081	0.0892459	-3.75414
KEGG_COLORECTAL_CANCER	-0.173052	0.0040548	-2.39331	0.0255888	0.0894714	-3.75694
PID_TRKR_PATHWAY	-0.210785	-0.00251682	-2.39279	0.0256173	0.0894961	-3.75793
IKEDA_MIR133_TARGETS_DN	-0.444747	0.0131173	-2.39234	0.0256421	0.0894961	-3.75879
FARDIN_HYPOXIA_11	-0.45861	0.0209221	-2.3923	0.0256447	0.0894961	-3.75888
MORI_EMU_MYC_LYMPHOMA_BY_ONSET_TIME_UP	0.311961	0.0108779	2.39188	0.0256678	0.0894991	-3.75968
WEIGEL_OXIDATIVE_STRESS_BY_HNE_AND_TBH	-0.177239	0.00688242	-2.39169	0.0256781	0.0894991	-3.76003
BIOCARTA_TID_PATHWAY	-0.316215	0.0245702	-2.38968	0.0257897	0.0898311	-3.76388
BIOCARTA_ASBCELL_PATHWAY	-0.364109	-0.030884	-2.38898	0.025828	0.0899078	-3.7652
REACTOME_ROLE_OF_SECOND_MESSENGERS_IN_NETRIN_1_SIGNALING	-0.394684	-0.0257941	-2.38778	0.0258952	0.0900845	-3.76751
REACTOME_RUNX2_REGULATES_OSTEOBLAST_DIFFERENTIATION	-0.236535	-0.00759966	-2.3859	0.0259997	0.090379	-3.77108
MYLLYKANGAS_AMPLIFICATION_HOT_SPOT_30	-0.485818	0.0478715	-2.38567	0.0260127	0.090379	-3.77152
JACKSON_DNMT1_TARGETS_UP	-0.177189	0.0184553	-2.38475	0.0260644	0.0905015	-3.77328
KEGG_GAP_JUNCTION	-0.206315	0.00180523	-2.38393	0.0261104	0.0905836	-3.77485
BIOCARTA_CELL2CELL_PATHWAY	-0.344218	-0.0240295	-2.38374	0.026121	0.0905836	-3.77521
TOYOTA_TARGETS_OF_MIR34B_AND_MIR34C	0.266783	-0.00269118	2.38284	0.0261712	0.090642	-3.77691
NABA_ECM_GLYCOPROTEINS	-0.225918	-0.0122435	-2.38258	0.0261861	0.090642	-3.77742
TANG_SENESCENCE_TP53_TARGETS_DN	0.461826	0.0166353	2.38256	0.0261873	0.090642	-3.77746
PARENT_MTOR_SIGNALING_DN	-0.244049	0.017667	-2.38124	0.0262612	0.0908321	-3.77996
ZHANG_ADIPOGENESIS_BY_BMP7	-0.296694	-0.00233784	-2.38099	0.0262752	0.0908321	-3.78043
REACTOME_INHIBITION_OF_THE_PROTEOLYTIC_ACTIVITY_OF_APC_C_REQUIRED_FOR_THE_ONSET_OF_ANAPHASE_BY_MITOTIC_SPINDLE_CHECKPOINT_COMPONENTS	0.373342	-0.00420399	2.37777	0.0264579	0.0914061	-3.78657
WANG_LSD1_TARGETS_UP	-0.282534	-0.00919366	-2.37671	0.0265181	0.091514	-3.78859
HANN_RESISTANCE_TO_BCL2_INHIBITOR_DN	-0.259003	-0.00503433	-2.37663	0.0265224	0.091514	-3.78873
TUOMISTO_TUMOR_SUPPRESSION_BY_COL13A1_UP	0.333401	-0.0255201	2.37605	0.0265554	0.0915705	-3.78983
WONG_ENDOMETRIAL_CANCER_LATE	-0.480806	-0.0111769	-2.37556	0.0265837	0.0916104	-3.79078
REACTOME_RESOLUTION_OF_D_LOOP_STRUCTURES_THROUGH_SYNTHESIS_DEPENDENT_STRAND_ANNEALING_SDSA	0.380133	0.00939373	2.3736	0.0266956	0.0919268	-3.7945
ZHOU_CELL_CYCLE_GENES_IN_IR_RESPONSE_6HR	0.504596	0.0176924	2.37337	0.0267089	0.0919268	-3.79494
REACTOME_DISASSEMBLY_OF_THE_DESTRUCTION_COMPLEX_AND_RECRUITMENT_OF_AXIN_TO_THE_MEMBRANE	-0.27052	0.00831983	-2.37295	0.0267326	0.0919507	-3.79573
REACTOME_ACTIVATION_OF_BH3_ONLY_PROTEINS	-0.248098	0.00814864	-2.37263	0.0267509	0.0919561	-3.79633
RUIZ_TNC_TARGETS_DN	0.376257	0.0131297	2.37232	0.0267691	0.0919615	-3.79694
SPIELMAN_LYMPHOBLAST_EUROPEAN_VS_ASIAN_2FC_DN	-0.28035	-0.0125202	-2.37088	0.0268519	0.0921881	-3.79968
LY_AGING_OLD_DN	0.433506	0.0222867	2.36963	0.0269237	0.0923771	-3.80204
FRASOR_RESPONSE_TO_SERM_OR_FULVESTRANT_DN	0.408899	0.0092472	2.36879	0.0269721	0.0924852	-3.80363
TAKEDA_TARGETS_OF_NUP98_HOXA9_FUSION_8D_UP	-0.198757	-0.00837485	-2.36809	0.0270127	0.0925109	-3.80497
FONTAINE_FOLLICULAR_THYROID_ADENOMA_DN	-0.208126	0.0085472	-2.36808	0.0270132	0.0925109	-3.80498
REACTOME_ECM_PROTEOGLYCANS	-0.26206	0.00286703	-2.36754	0.0270446	0.0925609	-3.80601
PID_ATM_PATHWAY	0.312575	0.0182539	2.36604	0.0271315	0.0927531	-3.80885
REACTOME_CONVERSION_FROM_APC_C:CDC20_TO_APC_C:CDH1_IN_LATE_ANAPHASE	0.355876	-0.0206259	2.36594	0.0271372	0.0927531	-3.80904
WAMUNYOKOLI_OVARIAN_CANCER_LMP_DN	-0.213449	-0.0202794	-2.3657	0.0271514	0.0927531	-3.8095
SA_PTEN_PATHWAY	-0.331258	-0.00844262	-2.36394	0.0272537	0.0929646	-3.81283
ASGHARZADEH_NEUROBLASTOMA_POOR_SURVIVAL_DN	-0.260556	0.00787584	-2.3638	0.0272623	0.0929646	-3.81311
BIOCARTA_IL7_PATHWAY	-0.292324	-0.020353	-2.36377	0.027264	0.0929646	-3.81317
JOHNSTONE_PARVB_TARGETS_2_UP	-0.231443	-0.0174726	-2.36346	0.0272821	0.0929688	-3.81376
COULOUARN_TEMPORAL_TGFB1_SIGNATURE_DN	-0.181947	-0.0189982	-2.36267	0.0273279	0.0930625	-3.81524
LIANG_SILENCED_BY_METHYLATION_UP	-0.286485	-0.0130931	-2.36218	0.0273564	0.0930625	-3.81617
BIOCARTA_PDZS_PATHWAY	-0.313735	-0.00988463	-2.36212	0.0273604	0.0930625	-3.81629
STARK_HYPPOCAMPUS_22Q11_DELETION_UP	-0.234794	0.0006883	-2.361	0.0274256	0.0932264	-3.8184
KORKOLA_EMBRYONIC_CARCINOMA_VS_SEMINOMA_DN	-0.244507	0.00750495	-2.36072	0.0274425	0.0932264	-3.81895
PID_FANCONI_PATHWAY	0.391287	0.0215203	2.35981	0.0274956	0.0933068	-3.82066
TOMIDA_METASTASIS_DN	-0.305957	-0.0191165	-2.35974	0.0275001	0.0933068	-3.8208
BIOCARTA_EPHA4_PATHWAY	-0.336939	-0.00964513	-2.35902	0.0275423	0.0933924	-3.82216
BIOCARTA_CARM1_PATHWAY	-0.36594	-0.0326804	-2.3587	0.0275611	0.0933988	-3.82277
REACTOME_SYNTHESIS_OF_PIPS_AT_THE_EARLY_ENDOSOME_MEMBRANE	-0.276617	0.0010402	-2.35811	0.0275958	0.0934585	-3.82388
REACTOME_RESPIRATORY_ELECTRON_TRANSPORT_ATP_SYNTHESIS_BY_CHEMIOSMOTIC_COUPLING_AND_HEAT_PRODUCTION_BY_UNCOUPLING_PROTEINS	0.298021	0.00131068	2.35726	0.0276464	0.0935723	-3.8255
CALVET_IRINOTECAN_SENSITIVE_VS_REVERTED_DN	-0.516682	0.01566	-2.35588	0.0277277	0.093769	-3.8281
PID_AURORA_B_PATHWAY	0.34823	0.00781195	2.3557	0.0277386	0.093769	-3.82845
BIOCARTA_BARD1_PATHWAY	0.464876	0.0292921	2.35379	0.027852	0.0940456	-3.83206
MCCOLLUM_GELDANAMYCIN_RESISTANCE_DN	-0.408452	0.00819507	-2.35375	0.0278546	0.0940456	-3.83214
REACTOME_SIGNALING_BY_NOTCH2	-0.260647	0.0120048	-2.35161	0.0279824	0.0943859	-3.83619
REACTOME_ERYTHROPOIETIN_ACTIVATES_RAS	-0.314819	0.0214329	-2.35148	0.0279897	0.0943859	-3.83642
BIOCARTA_HSP27_PATHWAY	0.28364	-0.00876619	2.34995	0.0280816	0.0945852	-3.83932
FRASOR_RESPONSE_TO_ESTRADIOL_DN	-0.180337	0.0161039	-2.34992	0.0280832	0.0945852	-3.83937
INGRAM_SHH_TARGETS	-0.446703	-0.0154048	-2.34952	0.0281076	0.0946093	-3.84014
KUROZUMI_RESPONSE_TO_ONCOCYTIC_VIRUS_AND_CYCLIC_RGD	-0.26361	0.00419338	-2.34915	0.0281296	0.0946256	-3.84083
ROSTY_CERVICAL_CANCER_PROLIFERATION_CLUSTER	0.493607	0.0369201	2.34846	0.0281708	0.0946712	-3.84213
REACTOME_GLOBAL_GENOME_NUCLEOTIDE_EXCISION_REPAIR_GG_NER	0.277107	0.0127163	2.34835	0.0281776	0.0946712	-3.84234
ZIRN_TRETINOIN_RESPONSE_WT1_DN	-0.527279	0.00227589	-2.34766	0.0282189	0.0947072	-3.84364
REACTOME_INTEGRIN_SIGNALING	-0.223716	-0.00507601	-2.3476	0.028223	0.0947072	-3.84377
BIOCARTA_AKT_PATHWAY	-0.295327	0.0117533	-2.34731	0.02824	0.0947072	-3.8443
REACTOME_PHOSPHORYLATION_OF_EMI1	0.605698	0.0193344	2.34604	0.0283171	0.0949081	-3.84671
REACTOME_HEPARAN_SULFATE_HEPARIN_HS_GAG_METABOLISM	-0.243345	-0.00194359	-2.34563	0.0283417	0.0949327	-3.84748
REACTOME_TRANSMISSION_ACROSS_CHEMICAL_SYNAPSES	-0.160741	0.00294537	-2.34492	0.0283849	0.0950193	-3.84882
REACTOME_POLO_LIKE_KINASE_MEDIATED_EVENTS	0.463487	0.00396945	2.34446	0.0284128	0.095055	-3.84969
REACTOME_MOLYBDENUM_COFACTOR_BIOSYNTHESIS	-0.417097	-0.0028394	-2.34353	0.0284691	0.0950753	-3.85145
SHEDDEN_LUNG_CANCER_POOR_SURVIVAL_A6	0.368581	0.010047	2.34351	0.0284704	0.0950753	-3.85149
SEITZ_NEOPLASTIC_TRANSFORMATION_BY_8P_DELETION_UP	-0.248721	0.00493252	-2.3435	0.0284707	0.0950753	-3.8515
REACTOME_INTERLEUKIN_18_SIGNALING	-0.320117	-0.00195684	-2.34218	0.0285509	0.0952439	-3.85398
REACTOME_DNA_REPLICATION_INITIATION	0.449186	-0.0133752	2.3421	0.0285559	0.0952439	-3.85414
QI_HYPOXIA	-0.214973	-0.00138618	-2.34127	0.0286068	0.0953561	-3.85571
HOSHIDA_LIVER_CANCER_SUBCLASS_S2	-0.251132	-0.00215248	-2.34082	0.0286343	0.0953897	-3.85656
IVANOVA_HEMATOPOIESIS_STEM_CELL	-0.172839	-0.00144716	-2.3403	0.0286656	0.0953929	-3.85753
PAL_PRMT5_TARGETS_UP	0.287292	0.0114695	2.34023	0.0286699	0.0953929	-3.85766
OHASHI_AURKA_TARGETS	0.384161	0.0211531	2.33964	0.0287063	0.095443	-3.85878
REACTOME_ALPHA_OXIDATION_OF_PHYTANATE	0.385084	-0.0161372	2.33942	0.0287197	0.095443	-3.85919
ROSS_AML_WITH_MLL_FUSIONS	-0.201188	-0.00851443	-2.33751	0.0288366	0.0956576	-3.86279
WHITEFORD_PEDIATRIC_CANCER_MARKERS	0.459749	0.0275758	2.33729	0.0288501	0.0956576	-3.8632
MIKKELSEN_MCV6_LCP_WITH_H3K4ME3	-0.18605	-0.0274397	-2.33729	0.0288504	0.0956576	-3.86321
REACTOME_NICOTINAMIDE_SALVAGING	-0.274597	0.00268443	-2.33714	0.0288593	0.0956576	-3.86348
CHIARETTI_T_ALL_REFRACTORY_TO_THERAPY	-0.193423	0.00861229	-2.33658	0.028894	0.0956576	-3.86454
FONTAINE_PAPILLARY_THYROID_CARCINOMA_DN	-0.155952	0.00839544	-2.3362	0.0289175	0.0956576	-3.86526
AIGNER_ZEB1_TARGETS	-0.24107	0.00477253	-2.33614	0.0289211	0.0956576	-3.86537
CAIRO_HEPATOBLASTOMA_UP	-0.174514	-0.00547043	-2.3361	0.0289234	0.0956576	-3.86544
HEIDENBLAD_AMPLICON_8Q24_UP	0.203193	0.0240284	2.33369	0.0290726	0.0960823	-3.86999
LIN_NPAS4_TARGETS_UP	-0.14507	0.00242067	-2.33338	0.0290917	0.0960823	-3.87057
PLASARI_NFIC_TARGETS_BASAL_DN	-0.326439	-0.00751568	-2.33318	0.0291042	0.0960823	-3.87095
REACTOME_TAK1_ACTIVATES_NFKB_BY_PHOSPHORYLATION_AND_ACTIVATION_OF_IKKS_COMPLEX	-0.281211	0.0141522	-2.33216	0.0291677	0.0961653	-3.87287
BASAKI_YBX1_TARGETS_UP	0.349087	0.0117755	2.33158	0.0292034	0.0961653	-3.87395
MIKKELSEN_PARTIALLY_REPROGRAMMED_TO_PLURIPOTENCY	-0.306395	0.0138429	-2.33147	0.0292102	0.0961653	-3.87416
REACTOME_GLYCOSAMINOGLYCAN_METABOLISM	-0.205527	-0.00584643	-2.33127	0.0292228	0.0961653	-3.87454
ZHAN_MULTIPLE_MYELOMA_MS_DN	0.218295	-0.00324486	2.33125	0.0292241	0.0961653	-3.87458
KANG_DOXORUBICIN_RESISTANCE_UP	0.535608	0.0411396	2.33109	0.0292342	0.0961653	-3.87489
REACTOME_N_GLYCAN_ANTENNAE_ELONGATION_IN_THE_MEDIAL_TRANS_GOLGI	-0.28283	-0.00988847	-2.33017	0.0292915	0.0962616	-3.87661
MIKKELSEN_MCV6_HCP_WITH_H3K27ME3	-0.181046	0.00373516	-2.33002	0.0293007	0.0962616	-3.87689
PID_INTEGRIN1_PATHWAY	-0.289846	-0.00135554	-2.32974	0.0293179	0.0962616	-3.87741
REACTOME_INSULIN_RECEPTOR_SIGNALLING_CASCADE	-0.239745	-0.0100218	-2.32949	0.0293335	0.0962616	-3.87788
REACTOME_THROMBIN_SIGNALLING_THROUGH_PROTEINASE_ACTIVATED_RECEPTORS_PARS	-0.27429	0.00496586	-2.32864	0.0293867	0.0963787	-3.87948
REACTOME_DNA_DOUBLE_STRAND_BREAK_REPAIR	0.297974	0.00401575	2.32794	0.0294304	0.0963826	-3.88079
BRUINS_UVC_RESPONSE_VIA_TP53_GROUP_A	-0.131103	8.8128e-05	-2.32781	0.0294386	0.0963826	-3.88104
REACTOME_INTERLEUKIN_1_PROCESSING	-0.447297	0.0138533	-2.32756	0.0294544	0.0963826	-3.88151
REACTOME_ACTIVATION_OF_THE_AP_1_FAMILY_OF_TRANSCRIPTION_FACTORS	-0.37282	-0.0156717	-2.3275	0.029458	0.0963826	-3.88162
DAVICIONI_MOLECULAR_ARMS_VS_ERMS_DN	-0.192604	0.00348792	-2.32671	0.0295079	0.0964796	-3.88311
VECCHI_GASTRIC_CANCER_EARLY_UP	0.304999	0.0102691	2.32647	0.0295228	0.0964796	-3.88356
CROMER_METASTASIS_UP	-0.216558	-0.0076184	-2.32548	0.0295853	0.0965851	-3.88543
KEGG_ERBB_SIGNALING_PATHWAY	-0.224943	-0.000116816	-2.32529	0.0295971	0.0965851	-3.88578
DER_IFN_BETA_RESPONSE_UP	-0.240729	-0.00254549	-2.32512	0.0296077	0.0965851	-3.8861
REACTOME_ADAPTIVE_IMMUNE_SYSTEM	-0.117305	0.00294178	-2.32459	0.0296408	0.096627	-3.88708
PID_IL2_STAT5_PATHWAY	-0.286627	-0.00333333	-2.32421	0.0296653	0.096627	-3.88781
WEIGEL_OXIDATIVE_STRESS_RESPONSE	-0.223572	-0.00579989	-2.32408	0.0296733	0.096627	-3.88805
KUROKAWA_LIVER_CANCER_EARLY_RECURRENCE_UP	0.355404	-0.0438752	2.32358	0.0297048	0.096647	-3.88899
FOSTER_TOLERANT_MACROPHAGE_UP	-0.168876	0.00357758	-2.32343	0.0297146	0.096647	-3.88928
WONG_PROTEASOME_GENE_MODULE	0.271197	0.00306481	2.3227	0.0297604	0.096739	-3.89064
MARTINEZ_RB1_AND_TP53_TARGETS_UP	-0.127008	-0.00111892	-2.32147	0.0298386	0.0969357	-3.89295
KEGG_LIMONENE_AND_PINENE_DEGRADATION	-0.414134	0.00725982	-2.32034	0.0299102	0.0970947	-3.89507
REACTOME_LRR_FLII_INTERACTING_PROTEIN_1_LRRFIP1_ACTIVATES_TYPE_I_IFN_PRODUCTION	-0.475134	-0.0399238	-2.32007	0.0299274	0.0970947	-3.89558
GNATENKO_PLATELET_SIGNATURE	-0.220037	-0.0126203	-2.31985	0.029941	0.0970947	-3.89598
KEGG_SPLICEOSOME	0.33847	0.00582527	2.31959	0.0299581	0.0970947	-3.89648
KAMMINGA_SENESCENCE	0.287574	-0.0176661	2.31899	0.0299959	0.0971316	-3.8976
MARTINEZ_TP53_TARGETS_UP	-0.1175	0.000196253	-2.31885	0.0300048	0.0971316	-3.89786
REACTOME_DEFECTIVE_C1GALT1C1_CAUSES_TN_POLYAGGLUTINATION_SYNDROME_TNPS	0.322059	-0.0103163	2.31827	0.0300421	0.097195	-3.89895
WU_APOPTOSIS_BY_CDKN1A_VIA_TP53	0.475824	0.0238707	2.31789	0.0300661	0.0972154	-3.89966
CASTELLANO_HRAS_AND_NRAS_TARGETS_UP	-0.394409	0.0303469	-2.31722	0.0301092	0.0972978	-3.90092
REACTOME_NEUREXINS_AND_NEUROLIGINS	-0.231334	0.00288973	-2.31535	0.030229	0.0975741	-3.90443
REACTOME_SIGNALING_BY_NOTCH3	-0.247065	0.00313556	-2.31533	0.0302302	0.0975741	-3.90446
REACTOME_MITOTIC_G2_G2_M_PHASES	0.292234	0.0141049	2.31352	0.0303466	0.0978923	-3.90785
REACTOME_MITOTIC_PROMETAPHASE	0.332233	0.00271208	2.3128	0.0303932	0.0979351	-3.9092
SIG_PIP3_SIGNALING_IN_CARDIAC_MYOCTES	-0.236254	0.00888439	-2.31275	0.0303963	0.0979351	-3.90929
PICCALUGA_ANGIOIMMUNOBLASTIC_LYMPHOMA_UP	-0.241095	-0.0205371	-2.31244	0.0304164	0.0979351	-3.90988
YAMASHITA_LIVER_CANCER_STEM_CELL_UP	-0.21033	0.00338813	-2.31186	0.0304538	0.0979351	-3.91096
KANG_DOXORUBICIN_RESISTANCE_DN	-0.328621	-0.00686758	-2.31172	0.0304628	0.0979351	-3.91122
VILLANUEVA_LIVER_CANCER_KRT19_UP	0.324959	0.00338154	2.31166	0.0304667	0.0979351	-3.91133
TOMLINS_METASTASIS_UP	-0.254147	0.0274943	-2.31136	0.0304861	0.0979401	-3.91189
RIZKI_TUMOR_INVASIVENESS_2D_UP	0.150575	-0.0126562	2.30993	0.0305787	0.0981731	-3.91457
KINSEY_TARGETS_OF_EWSR1_FLII_FUSION_UP	0.294456	0.00465401	2.30969	0.0305943	0.0981731	-3.91502
GAUTSCHI_SRC_SIGNALING	0.406463	-0.0385428	2.30835	0.0306814	0.0983953	-3.91753
SCHAEFFER_PROSTATE_DEVELOPMENT_AND_CANCER_BOX2_UP	-0.467834	0.028084	-2.30797	0.0307059	0.0984162	-3.91823
REACTOME_SPHINGOLIPID_DE_NOVO_BIOSYNTHESIS	-0.195001	0.00695123	-2.30735	0.030746	0.0984876	-3.91938
VANASSE_BCL2_TARGETS_DN	-0.189472	-0.00387281	-2.30602	0.0308332	0.0987092	-3.92188
LEIN_NEURON_MARKERS	-0.138728	0.00376982	-2.3021	0.0310903	0.0994745	-3.9292
SCHLOSSER_MYC_TARGETS_AND_SERUM_RESPONSE_UP	0.321904	0.00959711	2.30073	0.0311804	0.0997047	-3.93175
TAKADA_GASTRIC_CANCER_COPY_NUMBER_DN	-0.24911	-0.00321751	-2.30027	0.0312109	0.0997443	-3.93261
YAO_TEMPORAL_RESPONSE_TO_PROGESTERONE_CLUSTER_15	0.177264	-0.00322159	2.29977	0.0312443	0.0997892	-3.93355
REACTOME_SWITCHING_OF_ORIGINS_TO_A_POST_REPLICATIVE_STATE	0.343918	0.0227545	2.29951	0.0312612	0.0997892	-3.93403
CALVET_IRINOTECAN_SENSITIVE_VS_REVERTED_UP	-0.429361	-0.013596	-2.29899	0.0312959	0.0998418	-3.935
TONKS_TARGETS_OF_RUNX1_RUNX1T1_FUSION_SUSTAINDED_IN_ERYTHROCYTE_UP	-0.215699	-0.022291	-2.29717	0.0314169	0.100122	-3.9384
BIOCARTA_CREB_PATHWAY	-0.290029	0.00743095	-2.29711	0.0314206	0.100122	-3.93851
LE_EGR2_TARGETS_DN	-0.214378	-0.0139923	-2.29684	0.0314383	0.100122	-3.939
REACTOME_ORC1_REMOVAL_FROM_CHROMATIN	0.364686	0.0306945	2.29656	0.0314572	0.100124	-3.93953
SHAFFER_IRF4_TARGETS_IN_MYELOMA_VS_MATURE_B_LYMPHOCYTE	-0.208239	-0.000252676	-2.29417	0.031617	0.100574	-3.944
DAZARD_UV_RESPONSE_CLUSTER_G4	-0.292089	-0.00882245	-2.29364	0.0316523	0.100629	-3.94498
REACTOME_DNA_REPLICATION_PRE_INITIATION	0.376454	0.0276572	2.29151	0.0317952	0.100972	-3.94895
FRIDMAN_IMMORTALIZATION_DN	-0.227666	-0.000261667	-2.29127	0.0318109	0.100972	-3.94938
WANG_ESOPHAGUS_CANCER_VS_NORMAL_DN	-0.179545	-0.00103049	-2.29121	0.0318154	0.100972	-3.9495
REACTOME_SIGNALING_BY_TYPE_1_INSULIN_LIKE_GROWTH_FACTOR_1_RECEPTOR_IGF1R	-0.235712	-0.0175266	-2.29051	0.0318622	0.101062	-3.9508
LIU_SMARCA4_TARGETS	-0.28149	-0.0106176	-2.28981	0.0319094	0.101154	-3.9521
STONER_ESOPHAGEAL_CARCINOGENESIS_DN	0.47629	0.061308	2.28871	0.0319837	0.101331	-3.95415
REACTOME_ACTIVATED_PKN1_STIMULATES_TRANSCRIPTION_OF_AR_ANDROGEN_RECEPTOR_REGULATED_GENES_KLK2_AND_KLK3	-0.34923	0.0330569	-2.28839	0.0320052	0.101341	-3.95474
LINDGREN_BLADDER_CANCER_WITH_LOH_IN_CHR9Q	0.17108	0.0033911	2.28747	0.0320676	0.10148	-3.95646
JAZAG_TGFB1_SIGNALING_DN	0.25682	-0.014201	2.2859	0.0321742	0.101759	-3.95938
MYLLYKANGAS_AMPLIFICATION_HOT_SPOT_25	-0.316546	-0.0235094	-2.28503	0.0322332	0.101874	-3.96099
AMUNDSON_RESPONSE_TO_ARSENITE	-0.154246	0.00305223	-2.28482	0.0322478	0.101874	-3.96139
REACTOME_NF_KB_ACTIVATION_THROUGH_FADD_RIP_1_PATHWAY_MEDIATED_BY_CASPASE_8_AND_10	-0.310635	-0.00595024	-2.28438	0.0322777	0.10191	-3.9622
REACTOME_CELL_CYCLE_MITOTIC	0.306591	0.00635578	2.28405	0.0322999	0.101922	-3.96281
REACTOME_IRS_MEDIATED_SIGNALLING	-0.246359	-0.0125403	-2.28367	0.0323263	0.101947	-3.96353
REACTOME_SYNTHESIS_OF_PIPS_AT_THE_ER_MEMBRANE	0.498473	0.0367603	2.28301	0.0323711	0.101975	-3.96475
NEWMAN_ERCC6_TARGETS_DN	-0.318581	-0.00870274	-2.28289	0.0323795	0.101975	-3.96497
XU_GH1_EXOGENOUS_TARGETS_UP	-0.207047	0.000160543	-2.28272	0.032391	0.101975	-3.96529
MEISSNER_NPC_ICP_WITH_H3K4ME3	0.310617	0.0192111	2.28208	0.0324351	0.102048	-3.96648
KIM_LIVER_CANCER_POOR_SURVIVAL_UP	-0.227033	0.0176566	-2.28184	0.0324513	0.102048	-3.96692
XU_HGF_TARGETS_REPRESSED_BY_AKT1_UP	-0.400444	0.0138134	-2.28075	0.0325256	0.102207	-3.96894
MORI_LARGE_PRE_BII_LYMPHOCYTE_UP	0.458189	0.0322041	2.28056	0.0325389	0.102207	-3.96929
PUJANA_XPRSS_INT_NETWORK	0.400665	0.0074981	2.28005	0.0325742	0.102259	-3.97025
BIOCARTA_SPPA_PATHWAY	-0.240016	0.0221939	-2.27933	0.0326238	0.102357	-3.97159
BURTON_ADIPOGENESIS_8	-0.215817	0.00780507	-2.27702	0.0327831	0.102798	-3.97587
ALCALAY_AML_BY_NPM1_LOCALIZATION_UP	-0.176942	-0.00782269	-2.2753	0.0329022	0.103087	-3.97906
HUPER_BREAST_BASAL_VS_LUMINAL_UP	-0.180221	-0.0166248	-2.27514	0.032913	0.103087	-3.97935
REACTOME_NEURONAL_SYSTEM	-0.154646	-0.000139738	-2.27437	0.0329667	0.103146	-3.98078
NABA_CORE_MATRISOME	-0.224271	-0.00860018	-2.27409	0.0329861	0.103146	-3.9813
MARTENS_TRETINOIN_RESPONSE_DN	0.183477	0.0031687	2.27406	0.0329881	0.103146	-3.98135
ELVIDGE_HIF1A_TARGETS_UP	0.304261	-0.0191521	2.27239	0.0331045	0.103451	-3.98445
HADDAD_T_LYMPHOCYTE_AND_NK_PROGENITOR_DN	-0.253247	-0.00767636	-2.27198	0.0331331	0.103482	-3.98521
SIG_INSULIN_RECEPTOR_PATHWAY_IN_CARDIAC_MYOCYTES	-0.240397	0.01285	-2.27148	0.0331678	0.103532	-3.98613
EGUCHI_CELL_CYCLE_RB1_TARGETS	0.525226	0.0445139	2.27041	0.0332426	0.103706	-3.98811
MATZUK_OVULATION	-0.33471	-0.00392463	-2.26979	0.0332866	0.103761	-3.98927
VECCHI_GASTRIC_CANCER_ADVANCED_VS_EARLY_UP	-0.245732	-0.0103299	-2.26958	0.033301	0.103761	-3.98965
PLASARI_TGFB1_SIGNALING_VIA_NFIC_1HR_DN	-0.195373	-0.00490419	-2.26924	0.0333247	0.103761	-3.99027
REACTOME_PTK6_EXPRESSION	-0.483897	0.00419776	-2.26902	0.0333403	0.103761	-3.99068
STEGMEIER_PREMITOTIC_CELL_CYCLE_REGULATORS	0.31721	-0.00556469	2.26882	0.0333543	0.103761	-3.99106
REACTOME_REGULATION_OF_MRNA_STABILITY_BY_PROTEINS_THAT_BIND_AU_RICH_ELEMENTS	0.311324	0.0197682	2.26812	0.0334037	0.103856	-3.99236
VERRECCHIA_RESPONSE_TO_TGFB1_C2	-0.296177	-0.011022	-2.26722	0.0334667	0.103993	-3.99401
REACTOME_CHL1_INTERACTIONS	-0.375291	-0.015021	-2.26511	0.0336161	0.104382	-3.99792
BIOCARTA_PDGF_PATHWAY	-0.272665	-0.019656	-2.26491	0.0336301	0.104382	-3.99829
REACTOME_REGULATION_OF_TP53_ACTIVITY_THROUGH_ASSOCIATION_WITH_CO_FACTORS	-0.352268	0.0107197	-2.26401	0.0336935	0.10452	-3.99994
ABE_INNER_EAR	-0.196652	0.00427243	-2.26206	0.0338319	0.104878	-4.00355
GOLUB_ALL_VS_AML_DN	-0.29057	-0.0280926	-2.26185	0.033847	0.104878	-4.00394
REACTOME_REGULATION_OF_PYRUVATE_DEHYDROGENASE_PDH_COMPLEX	0.233395	-0.0106289	2.2615	0.0338722	0.104897	-4.00459
HAHTOLA_CTCL_PATHOGENESIS	-0.269805	-0.0017698	-2.26079	0.0339228	0.104994	-4.0059
FISCHER_DIRECT_P53_TARGETS_META_ANALYSIS	-0.170274	-0.00931069	-2.25978	0.0339948	0.105133	-4.00776
REACTOME_ZBP1_DAI_MEDIATED_INDUCTION_OF_TYPE_I_IFNS	-0.295485	-0.00538224	-2.25963	0.0340057	0.105133	-4.00804
WACKER_HYPOXIA_TARGETS_OF_VHL	-0.422272	0.0112192	-2.25924	0.0340331	0.105158	-4.00875
JEON_SMAD6_TARGETS_DN	0.329554	0.0140182	2.25794	0.0341266	0.105353	-4.01116
REACTOME_HOMOLOGY_DIRECTED_REPAIR	0.329637	0.00516552	2.25783	0.0341343	0.105353	-4.01136
CHIN_BREAST_CANCER_COPY_NUMBER_DN	0.276086	-0.014846	2.25606	0.0342614	0.105618	-4.01462
KEGG_EPITHELIAL_CELL_SIGNALING_IN_HELICOBACTER_PYLORI_INFECTION	-0.20813	-0.00404374	-2.25592	0.0342714	0.105618	-4.01488
GARGALOVIC_RESPONSE_TO_OXIDIZED_PHOSPHOLIPIDS_CYAN_UP	-0.308243	-0.00149015	-2.25584	0.0342777	0.105618	-4.01504
WOOD_EBV_EBNA1_TARGETS_UP	-0.162452	0.00051328	-2.25539	0.0343097	0.105657	-4.01586
REACTOME_PI_3K_CASCADE:FGFR1	-0.317635	0.0117129	-2.25343	0.0344511	0.106033	-4.01947
KEGG_PANCREATIC_CANCER	-0.202734	0.0142234	-2.25221	0.0345397	0.106215	-4.02172
REACTOME_BIOSYNTHESIS_OF_SPECIALIZED_PRORESOLVING_MEDIATORS_SPMS	-0.268226	-0.00652943	-2.25208	0.0345489	0.106215	-4.02196
SCHMAHL_PDGF_SIGNALING	-0.298534	-0.0126918	-2.25143	0.0345965	0.106246	-4.02316
SIG_CHEMOTAXIS	-0.197374	0.00944972	-2.25115	0.0346166	0.106246	-4.02367
REACTOME_CONSTITUTIVE_SIGNALING_BY_AKT1_E17K_IN_CANCER	-0.308552	0.0101214	-2.25115	0.0346168	0.106246	-4.02368
SANSOM_APC_MYC_TARGETS	0.155641	0.00676452	2.25002	0.0346992	0.106369	-4.02576
YAO_TEMPORAL_RESPONSE_TO_PROGESTERONE_CLUSTER_11	0.295375	0.00212789	2.25001	0.0346997	0.106369	-4.02578
BIOCARTA_CARDIACEGF_PATHWAY	-0.235867	0.00301892	-2.24958	0.0347311	0.106369	-4.02657
REACTOME_ZINC_EFFLUX_AND_COMPARTMENTALIZATION_BY_THE_SLC30_FAMILY	0.391094	0.0126867	2.2494	0.034744	0.106369	-4.0269
POOLA_INVASIVE_BREAST_CANCER_DN	-0.200821	0.00731195	-2.24927	0.0347538	0.106369	-4.02714
MORI_MATURE_B_LYMPHOCYTE_UP	-0.183221	-0.0046515	-2.24803	0.0348438	0.106575	-4.02941
KAUFFMANN_DNA_REPAIR_GENES	0.288421	0.00311217	2.24781	0.0348598	0.106575	-4.02981
CUI_TCF21_TARGETS_UP	-0.284126	0.0210802	-2.24713	0.03491	0.106669	-4.03108
REACTOME_DEFECTIVE_B4GALT7_CAUSES_EDS_PROGEROID_TYPE	-0.307325	-0.0196236	-2.24582	0.0350058	0.106903	-4.03348
DACOSTA_UV_RESPONSE_VIA_ERCC3_XPCS_DN	-0.234326	0.0100476	-2.24554	0.0350267	0.106907	-4.034
REACTOME_ELEVATION_OF_CYTOSOLIC_CA2PLUS_LEVELS	-0.232356	-0.00795091	-2.24478	0.0350826	0.106963	-4.0354
REACTOME_REGULATION_OF_IFNA_SIGNALING	-0.233738	-0.000111274	-2.2443	0.0351175	0.106963	-4.03627
YIH_RESPONSE_TO_ARSENITE_C4	-0.327896	-0.0238568	-2.24417	0.0351274	0.106963	-4.03652
BIOCARTA_EICOSANOID_PATHWAY	-0.282869	-0.015555	-2.24387	0.0351492	0.106963	-4.03707
REACTOME_CELL_CYCLE_CHECKPOINTS	0.322315	0.0136808	2.24347	0.0351785	0.106963	-4.0378
CHANDRAN_METASTASIS_DN	-0.15651	0.000129087	-2.24287	0.0352233	0.106963	-4.03891
CHYLA_CBFA2T3_TARGETS_DN	-0.15311	-0.00942625	-2.24277	0.0352304	0.106963	-4.03909
JAERVINEN_AMPLIFIED_IN_LARYNGEAL_CANCER	0.216964	0.014048	2.24263	0.0352411	0.106963	-4.03935
MONNIER_POSTRADIATION_TUMOR_ESCAPE_DN	-0.134578	-0.00581362	-2.24241	0.0352571	0.106963	-4.03975
LEE_NEURAL_CREST_STEM_CELL_UP	-0.185505	-0.00624772	-2.24239	0.0352583	0.106963	-4.03978
FARDIN_HYPOXIA_9	-0.567355	-0.0168197	-2.24227	0.0352671	0.106963	-4.04
PID_IL1_PATHWAY	-0.295515	-0.00363914	-2.24196	0.0352901	0.106963	-4.04057
PIEPOLI_LGI1_TARGETS_DN	-0.325951	-0.00107458	-2.24186	0.0352977	0.106963	-4.04076
REACTOME_NUCLEOSOME_ASSEMBLY	0.441178	0.00252223	2.24136	0.0353346	0.107015	-4.04168
MISSIAGLIA_REGULATED_BY_METHYLATION_DN	0.428389	0.0196235	2.24063	0.0353891	0.107072	-4.04303
REACTOME_PI_3K_CASCADE:FGFR4	-0.287491	0.0011597	-2.24059	0.035392	0.107072	-4.0431
REACTOME_INITIAL_TRIGGERING_OF_COMPLEMENT	-0.288207	0.000155386	-2.23992	0.0354415	0.107162	-4.04433
KEGG_PARKINSONS_DISEASE	0.25126	0.00641966	2.23917	0.0354971	0.107269	-4.0457
REACTOME_METABOLISM_OF_INGESTED_SEMET_SEC_MESEC_INTO_H2SE	-0.3442	0.0449834	-2.23892	0.0355159	0.107269	-4.04616
DURAND_STROMA_S_UP	-0.185613	-0.000649614	-2.23813	0.0355748	0.107388	-4.04762
KEGG_HUNTINGTONS_DISEASE	0.180436	0.00111344	2.23634	0.0357084	0.107732	-4.0509
REACTOME_CLEC7A_INFLAMMASOME_PATHWAY	-0.442615	0.0219572	-2.23556	0.0357666	0.107849	-4.05233
KEGG_AMINO_SUGAR_AND_NUCLEOTIDE_SUGAR_METABOLISM	-0.183346	0.0229151	-2.23449	0.0358466	0.108031	-4.05429
REACTOME_SIGNALING_BY_FGFR4_IN_DISEASE	-0.279445	-0.018839	-2.23397	0.035886	0.10809	-4.05525
HOLLEMAN_DAUNORUBICIN_B_ALL_DN	-0.251687	0.0252483	-2.23345	0.0359247	0.108148	-4.05619
REACTOME_LIPOPHAGY	-0.39422	0.0273595	-2.23284	0.0359708	0.108227	-4.05732
KEGG_THYROID_CANCER	-0.204885	0.0124665	-2.22991	0.0361916	0.108832	-4.06267
REACTOME_ORGANIC_CATION_ANION_ZWITTERION_TRANSPORT	-0.305723	0.00713302	-2.2278	0.0363515	0.109253	-4.06654
BIOCARTA_FXR_PATHWAY	-0.34601	-0.0109748	-2.2274	0.0363824	0.109286	-4.06728
BORLAK_LIVER_CANCER_EGF_UP	-0.200765	0.0113177	-2.22644	0.0364555	0.109446	-4.06904
VALK_AML_CLUSTER_12	-0.288951	-0.000344581	-2.22541	0.0365341	0.109575	-4.07092
BUSA_SAM68_TARGETS_UP	-0.34131	-0.00694721	-2.225	0.0365649	0.109575	-4.07166
ELVIDGE_HYPOXIA_DN	0.242308	-0.00744601	2.22491	0.0365722	0.109575	-4.07183
REACTOME_MRNA_SPLICING_MINOR_PATHWAY	0.327049	0.00882443	2.22474	0.0365852	0.109575	-4.07214
HOFMANN_CELL_LYMPHOMA_UP	-0.227899	0.0161907	-2.22457	0.0365981	0.109575	-4.07245
HO_LIVER_CANCER_VASCULAR_INVASION	-0.273651	-0.0207245	-2.22402	0.0366396	0.10959	-4.07345
RIZ_ERYTHROID_DIFFERENTIATION	0.278115	-0.00105738	2.22353	0.0366774	0.10959	-4.07435
REACTOME_CYCLIN_A:CDK2_ASSOCIATED_EVENTS_AT_S_PHASE_ENTRY	0.278014	0.0146071	2.22352	0.0366779	0.10959	-4.07436
REACTOME_HIV_INFECTION	0.255784	0.00891668	2.22346	0.0366828	0.10959	-4.07448
SHAFFER_IRF4_TARGETS_IN_PLASMA_CELL_VS_MATURE_B_LYMPHOCYTE	-0.195422	-0.00227126	-2.22221	0.0367785	0.109816	-4.07676
GILDEA_METASTASIS	-0.239266	-0.00865027	-2.22005	0.0369452	0.110254	-4.08072
BIOCARTA_P53_PATHWAY	-0.340709	0.0119549	-2.21968	0.0369731	0.110278	-4.08137
BIOCARTA_IL5_PATHWAY	-0.357522	-0.0275681	-2.219	0.0370257	0.110375	-4.08262
ACEVEDO_LIVER_CANCER_WITH_H3K9ME3_UP	-0.138481	0.00294661	-2.21603	0.0372556	0.111	-4.08803
REACTOME_NUCLEOBASE_BIOSYNTHESIS	0.405484	0.0327146	2.21399	0.0374147	0.111376	-4.09176
YAGI_AML_SURVIVAL	-0.129695	-0.000139414	-2.21379	0.0374303	0.111376	-4.09212
LEE_EARLY_T_LYMPHOCYTE_DN	-0.21453	-0.00517434	-2.21363	0.0374426	0.111376	-4.09241
BIOCARTA_NKCELLS_PATHWAY	-0.324955	-0.00345796	-2.21312	0.0374828	0.111399	-4.09335
HU_GENOTOXIC_DAMAGE_24HR	-0.307769	0.0133385	-2.21289	0.0375004	0.111399	-4.09376
ALONSO_METASTASIS_DN	-0.184655	0.00422343	-2.21276	0.0375109	0.111399	-4.09401
AMIT_EGF_RESPONSE_60_MCF10A	-0.250799	-0.016273	-2.2116	0.0376017	0.111608	-4.09612
DE_YY1_TARGETS_UP	-0.250608	-0.000652193	-2.21109	0.0376417	0.11165	-4.09705
MYLLYKANGAS_AMPLIFICATION_HOT_SPOT_24	-0.254934	-0.00819833	-2.21066	0.0376752	0.11165	-4.09783
HOSHIDA_LIVER_CANCER_LATE_RECURRENCE_UP	-0.142857	0.00543006	-2.21064	0.0376767	0.11165	-4.09786
REACTOME_RUNX1_REGULATES_GENES_INVOLVED_IN_MEGAKARYOCYTE_DIFFERENTIATION_AND_PLATELET_FUNCTION	-0.24298	0.0113763	-2.21029	0.0377041	0.111671	-4.0985
LANDIS_BREAST_CANCER_PROGRESSION_UP	-0.185401	0.0163189	-2.20825	0.0378651	0.112087	-4.10222
BERENJENO_TRANSFORMED_BY_RHOA_UP	0.303751	0.006683	2.20752	0.0379225	0.112164	-4.10355
WONG_EMBRYONIC_STEM_CELL_CORE	0.334869	0.0239054	2.2074	0.0379322	0.112164	-4.10377
ZHENG_FOXP3_TARGETS_IN_T_LYMPHOCYTE_DN	-0.221223	0.00437593	-2.20714	0.0379521	0.112164	-4.10423
SWEET_KRAS_TARGETS_UP	-0.2591	-0.0092301	-2.20658	0.0379969	0.112236	-4.10526
REACTOME_DEFECTIVE_CFTR_CAUSES_CYSTIC_FIBROSIS	0.290541	0.0195058	2.20546	0.0380856	0.112437	-4.10729
ONDER_CDH1_TARGETS_3_DN	-0.193318	0.0119402	-2.20507	0.038116	0.112467	-4.10799
PID_SYNDECAN_4_PATHWAY	-0.211914	-0.00542652	-2.2047	0.0381455	0.112494	-4.10867
BURTON_ADIPOGENESIS_PEAK_AT_0HR	-0.275033	-0.00446582	-2.20424	0.0381825	0.112523	-4.10951
PID_HNF3A_PATHWAY	-0.200212	0.00678298	-2.20374	0.0382222	0.112523	-4.11042
REACTOME_PTK6_PROMOTES_HIF1A_STABILIZATION	-0.476627	-0.00298044	-2.2037	0.0382255	0.112523	-4.1105
REACTOME_INTERLEUKIN_12_SIGNALING	-0.211942	-0.0119295	-2.20355	0.0382372	0.112523	-4.11077
WATANABE_RECTAL_CANCER_RADIOTHERAPY_RESPONSIVE_DN	-0.166551	0.00695146	-2.20231	0.0383357	0.112752	-4.11301
BIOCARTA_SHH_PATHWAY	-0.275852	-0.0168073	-2.20151	0.0383999	0.112838	-4.11448
CASTELLANO_NRAS_TARGETS_UP	-0.201156	-0.0204242	-2.20143	0.0384061	0.112838	-4.11462
WANG_ESOPHAGUS_CANCER_VS_NORMAL_UP	-0.172819	-0.000281514	-2.19915	0.0385887	0.113308	-4.11876
REACTOME_INTERLEUKIN_2_SIGNALING	-0.36695	0.00693235	-2.19892	0.0386071	0.113308	-4.11918
REACTOME_REGULATED_PROTEOLYSIS_OF_P75NTR	-0.381683	-0.0074839	-2.19706	0.0387568	0.113655	-4.12255
LINDSTEDT_DENDRITIC_CELL_MATURATION_D	-0.246117	0.0101239	-2.1969	0.0387695	0.113655	-4.12284
CHIANG_LIVER_CANCER_SUBCLASS_CTNNB1_UP	-0.161427	-0.000239317	-2.19668	0.0387872	0.113655	-4.12324
REACTOME_SLBP_DEPENDENT_PROCESSING_OF_REPLICATION_DEPENDENT_HISTONE_PRE_MRNAS	0.406679	-0.00657977	2.19621	0.0388251	0.113705	-4.12409
REACTOME_GP1B_IX_V_ACTIVATION_SIGNALLING	-0.30414	-0.0155178	-2.19405	0.0389993	0.114155	-4.128
CHENG_TAF7L_TARGETS	-0.457323	-0.00142743	-2.19325	0.0390641	0.114283	-4.12945
SARTIPY_NORMAL_AT_INSULIN_RESISTANCE_DN	-0.31053	-0.0158363	-2.19259	0.0391182	0.114381	-4.13066
BIOCARTA_IL10_PATHWAY	-0.391091	-0.0457332	-2.19199	0.0391667	0.114449	-4.13174
FLECHNER_PBL_KIDNEY_TRANSPLANT_REJECTED_VS_OK_UP	-0.154959	0.0120766	-2.19179	0.0391831	0.114449	-4.1321
REACTOME_INTERLEUKIN_6_FAMILY_SIGNALING	-0.270164	0.00643278	-2.19153	0.0392045	0.114451	-4.13258
YORDY_RECIPROCAL_REGULATION_BY_ETS1_AND_SP100_UP	-0.25363	-0.00648446	-2.19092	0.0392537	0.114533	-4.13367
TESAR_ALK_TARGETS_HUMAN_ES_5D_UP	-0.497954	0.00553827	-2.19023	0.0393103	0.114638	-4.13493
REACTOME_SIGNALING_BY_NOTCH1_T_7_9_NOTCH1:M1580_K2555_TRANSLOCATION_MUTANT	-0.466611	-0.0183265	-2.1895	0.0393697	0.11475	-4.13625
ELVIDGE_HYPOXIA_BY_DMOG_DN	0.237894	-0.0170734	2.18915	0.0393986	0.114773	-4.13689
REACTOME_SEMA4D_MEDIATED_INHIBITION_OF_CELL_ATTACHMENT_AND_MIGRATION	-0.27541	0.0188238	-2.18879	0.0394279	0.114798	-4.13754
BOYAULT_LIVER_CANCER_SUBCLASS_G123_UP	0.305938	0.0131426	2.18806	0.0394877	0.114911	-4.13886
KAMMINGA_EZH2_TARGETS	0.472041	0.0280571	2.18759	0.0395259	0.114962	-4.1397
MOOTHA_ROS	-0.478069	-0.00939942	-2.18721	0.0395573	0.114992	-4.14039
BROWNE_HCMV_INFECTION_1HR_UP	-0.271406	0.00968655	-2.1859	0.039665	0.115206	-4.14277
ITO_PTTG1_TARGETS_DN	-0.372586	-0.00478508	-2.1858	0.0396729	0.115206	-4.14294
REACTOME_GLUTAMATE_NEUROTRANSMITTER_RELEASE_CYCLE	-0.241763	0.0071413	-2.18223	0.0399676	0.115958	-4.14939
ISSAEVA_MLL2_TARGETS	-0.228461	-0.00498229	-2.18202	0.0399846	0.115958	-4.14976
REACTOME_N_GLYCAN_ANTENNAE_ELONGATION	-0.358349	0.0280856	-2.1819	0.0399948	0.115958	-4.14999
YOSHIMURA_MAPK8_TARGETS_UP	-0.122312	0.00263299	-2.18092	0.0400764	0.116091	-4.15176
FRASOR_RESPONSE_TO_SERM_OR_FULVESTRANT_UP	-0.316625	0.00490714	-2.18084	0.040083	0.116091	-4.15191
REACTOME_ASSEMBLY_AND_CELL_SURFACE_PRESENTATION_OF_NMDA_RECEPTORS	-0.258255	0.00899739	-2.17993	0.0401581	0.116247	-4.15354
PUJANA_BRCA2_PCC_NETWORK	0.314997	0.00789657	2.17945	0.0401984	0.116303	-4.15441
TING_SILENCED_BY_DICER	-0.237955	-0.00417624	-2.17912	0.0402254	0.116319	-4.155
REACTOME_SIGNAL_AMPLIFICATION	-0.249052	-0.00542116	-2.17858	0.0402712	0.116356	-4.15599
PID_AURORA_A_PATHWAY	0.285928	-0.0157579	2.17842	0.0402845	0.116356	-4.15628
XU_RESPONSE_TO_TRETINOIN_UP	-0.290309	-0.0312028	-2.17815	0.0403064	0.116356	-4.15675
REACTOME_DEATH_RECEPTOR_SIGNALLING	-0.139885	0.00682209	-2.17796	0.0403226	0.116356	-4.1571
LIN_TUMOR_ESCAPE_FROM_IMMUNE_ATTACK	-0.262955	-0.0169948	-2.17652	0.0404427	0.116625	-4.15969
STEARMAN_LUNG_CANCER_EARLY_VS_LATE_DN	-0.190579	-0.0198156	-2.17634	0.0404581	0.116625	-4.16003
REACTOME_SCF_SKP2_MEDIATED_DEGRADATION_OF_P27_P21	0.324562	0.0219829	2.1748	0.040587	0.116873	-4.1628
KANG_CISPLATIN_RESISTANCE_UP	-0.35249	0.0226078	-2.17445	0.0406167	0.116873	-4.16343
YAGI_AML_RELAPSE_PROGNOSIS	-0.228126	0.0204883	-2.17426	0.040632	0.116873	-4.16376
NOUZOVA_TRETINOIN_AND_H4_ACETYLATION	0.19174	0.00969946	2.17409	0.0406471	0.116873	-4.16409
NAKAMURA_ADIPOGENESIS_LATE_UP	-0.199215	-0.0129688	-2.17405	0.0406504	0.116873	-4.16416
POS_RESPONSE_TO_HISTAMINE_DN	0.261102	0.00949211	2.17347	0.0406989	0.116951	-4.16519
REACTOME_ASSEMBLY_OF_THE_PRE_REPLICATIVE_COMPLEX	0.359061	0.0298968	2.17235	0.0407928	0.11716	-4.1672
REACTOME_FOXO_MEDIATED_TRANSCRIPTION	-0.23599	0.00569385	-2.17176	0.0408432	0.117243	-4.16828
REACTOME_ACTIVATED_NOTCH1_TRANSMITS_SIGNAL_TO_THE_NUCLEUS	-0.275266	-0.00177643	-2.16928	0.0410528	0.117783	-4.17274
YAMASHITA_LIVER_CANCER_WITH_EPCAM_UP	-0.242888	0.00329558	-2.16876	0.0410972	0.117849	-4.17368
BERENJENO_ROCK_SIGNALING_NOT_VIA_RHOA_UP	-0.288765	-0.0177192	-2.1683	0.0411358	0.117898	-4.17449
DAZARD_UV_RESPONSE_CLUSTER_G24	-0.179575	-0.00484452	-2.16657	0.0412835	0.118199	-4.17762
REACTOME_G_ALPHA_Q_SIGNALLING_EVENTS	-0.173876	-0.00079672	-2.16626	0.0413098	0.118199	-4.17817
BIOCARTA_TCAPOPTOSIS_PATHWAY	-0.296077	-0.023714	-2.16609	0.041324	0.118199	-4.17847
JAIN_NFKB_SIGNALING	0.197945	-0.00397922	2.16606	0.0413266	0.118199	-4.17852
REACTOME_DNA_REPAIR	0.251425	0.0073171	2.16581	0.0413487	0.118201	-4.17899
JOHNSTONE_PARVB_TARGETS_1_DN	-0.203871	-0.00335888	-2.16464	0.0414484	0.118424	-4.18109
BIOCARTA_RACC_PATHWAY	-0.282389	0.00219374	-2.16351	0.0415448	0.118638	-4.18311
PID_INSULIN_GLUCOSE_PATHWAY	-0.252897	0.0153041	-2.1632	0.041572	0.118654	-4.18368
REACTOME_KSRP_KHSRP_BINDS_AND_DESTABILIZES_MRNA	0.304907	0.0198659	2.16236	0.0416438	0.118797	-4.18518
DANG_REGULATED_BY_MYC_UP	0.239316	0.0042674	2.1616	0.0417096	0.118923	-4.18655
SCHAVOLT_TARGETS_OF_TP53_AND_TP63	-0.366322	0.00862468	-2.16116	0.0417473	0.118969	-4.18734
ZHAN_VARIABLE_EARLY_DIFFERENTIATION_GENES_UP	-0.22431	0.0043193	-2.16057	0.0417982	0.119052	-4.1884
CHEN_LVAD_SUPPORT_OF_FAILING_HEART_DN	-0.227709	-0.0149098	-2.15988	0.0418573	0.119159	-4.18963
RODRIGUES_THYROID_CARCINOMA_POORLY_DIFFERENTIATED_UP	0.297075	0.00248599	2.15959	0.0418825	0.119169	-4.19015
SANA_TNF_SIGNALING_DN	-0.179134	0.00195018	-2.15883	0.0419482	0.119245	-4.19151
REACTOME_PTK6_REGULATES_PROTEINS_INVOLVED_IN_RNA_PROCESSING	-0.409533	-0.0341629	-2.15878	0.0419526	0.119245	-4.19161
MOOTHA_HUMAN_MITODB_6_2002	0.213523	0.0125449	2.15762	0.0420531	0.119469	-4.19369
REACTOME_REGULATION_OF_APOPTOSIS	0.351648	0.027491	2.15689	0.0421162	0.11951	-4.19499
REACTOME_METABOLISM_OF_STEROID_HORMONES	-0.218512	-0.00760602	-2.15686	0.0421189	0.11951	-4.19505
RODWELL_AGING_KIDNEY_NO_BLOOD_DN	-0.160205	-0.0105168	-2.15662	0.0421395	0.11951	-4.19547
POMEROY_MEDULLOBLASTOMA_DESMOPLASIC_VS_CLASSIC_DN	-0.226691	-0.0166294	-2.15631	0.0421664	0.11951	-4.19603
REACTOME_PHOSPHORYLATION_SITE_MUTANTS_OF_CTNNB1_ARE_NOT_TARGETED_TO_THE_PROTEASOME_BY_THE_DESTRUCTION_COMPLEX	-0.291078	-0.0109996	-2.1562	0.0421763	0.11951	-4.19623
LUI_THYROID_CANCER_PAX8_PPARG_UP	-0.23783	0.00677444	-2.15361	0.0424022	0.120089	-4.20088
WAMUNYOKOLI_OVARIAN_CANCER_GRADES_1_2_DN	-0.253464	-0.0161327	-2.15328	0.0424306	0.120107	-4.20146
REACTOME_COLLAGEN_BIOSYNTHESIS_AND_MODIFYING_ENZYMES	-0.26147	-0.0124547	-2.15243	0.0425052	0.120257	-4.20299
COLLIS_PRKDC_REGULATORS	0.268894	-0.00313764	2.15185	0.0425563	0.120339	-4.20403
PEPPER_CHRONIC_LYMPHOCYTIC_LEUKEMIA_DN	-0.314066	-0.00882007	-2.15085	0.0426441	0.120416	-4.20582
KASLER_HDAC7_TARGETS_2_DN	-0.264907	0.00929445	-2.15083	0.0426454	0.120416	-4.20585
CROSBY_E2F4_TARGETS	0.57386	0.0183248	2.15054	0.0426705	0.120416	-4.20636
BIOCARTA_RAN_PATHWAY	0.494331	0.0089751	2.15054	0.042671	0.120416	-4.20637
BUYTAERT_PHOTODYNAMIC_THERAPY_STRESS_DN	0.159858	0.00941239	2.14976	0.0427394	0.120547	-4.20776
GARGALOVIC_RESPONSE_TO_OXIDIZED_PHOSPHOLIPIDS_GREY_DN	-0.181131	0.0032987	-2.14914	0.0427939	0.120639	-4.20887
REACTOME_ACTIVATION_OF_RAC1	-0.373772	0.0319817	-2.14807	0.0428884	0.120799	-4.21079
ZHAN_MULTIPLE_MYELOMA_CD1_AND_CD2_DN	-0.230055	0.0101477	-2.14788	0.0429053	0.120799	-4.21113
REACTOME_PURINE_SALVAGE	0.352057	0.0408842	2.14748	0.0429406	0.120799	-4.21184
KARLSSON_TGFB1_TARGETS_DN	-0.202164	-0.00201106	-2.14727	0.042959	0.120799	-4.21222
UEDA_CENTRAL_CLOCK	-0.168799	0.0126325	-2.14675	0.043005	0.120799	-4.21315
BAKER_HEMATOPOESIS_STAT5_TARGETS	-0.399197	0.0164191	-2.14672	0.0430077	0.120799	-4.2132
REACTOME_MISSPLICED_LRP5_MUTANTS_HAVE_ENHANCED_BETA_CATENIN_DEPENDENT_SIGNALING	-0.377992	-0.0460445	-2.14667	0.043012	0.120799	-4.21329
HELLER_HDAC_TARGETS_SILENCED_BY_METHYLATION_UP	-0.133424	-0.000546893	-2.14639	0.0430367	0.120799	-4.21379
KEGG_NITROGEN_METABOLISM	-0.268816	0.0112185	-2.14626	0.0430483	0.120799	-4.21402
WANG_CISPLATIN_RESPONSE_AND_XPC_UP	0.209454	-0.00968787	2.14595	0.0430758	0.120814	-4.21457
TERAMOTO_OPN_TARGETS_CLUSTER_3	0.33774	0.0247581	2.14545	0.0431202	0.120848	-4.21547
REACTOME_CELL_CYCLE	0.28598	0.00700021	2.14532	0.0431316	0.120848	-4.2157
REACTOME_ACTIVATION_OF_SMO	-0.320635	0.0299641	-2.14323	0.0433177	0.121307	-4.21944
REACTOME_NECTIN_NECL_TRANS_HETERODIMERIZATION	0.456477	-0.00653841	2.14257	0.0433767	0.121411	-4.22062
TSAI_DNAJB4_TARGETS_DN	-0.265586	0.0395247	-2.14171	0.0434527	0.121518	-4.22214
REACTOME_ASSEMBLY_OF_THE_ORC_COMPLEX_AT_THE_ORIGIN_OF_REPLICATION	0.427741	0.0201527	2.14164	0.0434594	0.121518	-4.22228
MALIK_REPRESSED_BY_ESTROGEN	-0.349302	-0.0353651	-2.13963	0.0436391	0.121871	-4.22586
BIOCARTA_EPO_PATHWAY	-0.296364	-0.0171228	-2.13942	0.0436581	0.121871	-4.22624
BENPORATH_EED_TARGETS	-0.11247	0.00708188	-2.13926	0.0436726	0.121871	-4.22652
KEGG_GLYOXYLATE_AND_DICARBOXYLATE_METABOLISM	0.285977	0.0183814	2.13903	0.0436935	0.121871	-4.22694
WANG_BARRETTS_ESOPHAGUS_DN	-0.239278	0.00591423	-2.13882	0.0437116	0.121871	-4.2273
CHANG_IMMORTALIZED_BY_HPV31_UP	-0.182469	-0.00653536	-2.13858	0.0437333	0.121871	-4.22773
KONG_E2F3_TARGETS	0.439398	0.0190347	2.13827	0.043761	0.121871	-4.22828
REACTOME_THE_ROLE_OF_GTSE1_IN_G2_M_PROGRESSION_AFTER_G2_CHECKPOINT	0.327872	0.022978	2.13826	0.0437626	0.121871	-4.22831
MATZUK_IMPLANTATION_AND_UTERINE	0.182968	-0.011948	2.13778	0.0438053	0.121928	-4.22916
REACTOME_THROMBOXANE_SIGNALLING_THROUGH_TP_RECEPTOR	-0.276992	0.0093226	-2.13698	0.0438772	0.122066	-4.23058
PEDERSEN_METASTASIS_BY_ERBB2_ISOFORM_6	-0.241094	-0.0232447	-2.13645	0.043925	0.122137	-4.23153
KAPOSI_LIVER_CANCER_MET_UP	-0.230464	0.00551758	-2.13376	0.0441682	0.122698	-4.23632
REACTOME_POST_TRANSCRIPTIONAL_SILENCING_BY_SMALL_RNAS	-0.541379	-0.0178692	-2.13373	0.0441711	0.122698	-4.23638
SHETH_LIVER_CANCER_VS_TXNIP_LOSS_PAM4	-0.129688	0.000762963	-2.13269	0.0442654	0.122897	-4.23822
TONKS_TARGETS_OF_RUNX1_RUNX1T1_FUSION_GRANULOCYTE_UP	-0.193453	-0.0083522	-2.13228	0.044303	0.12294	-4.23896
BIOCARTA_LYMPHOCYTE_PATHWAY	-0.273813	0.00510704	-2.13093	0.0444259	0.123206	-4.24137
BIOCARTA_TCYTOTOXIC_PATHWAY	-0.319717	0.0107239	-2.13062	0.0444539	0.123206	-4.24191
NEWMAN_ERCC6_TARGETS_UP	-0.295085	-0.0166412	-2.13048	0.0444663	0.123206	-4.24215
ZWANG_EGF_INTERVAL_UP	-0.13811	-0.00439392	-2.12963	0.0445444	0.123361	-4.24368
EHRLICH_ICF_SYNDROM_DN	-0.256542	0.0112047	-2.12928	0.0445756	0.123385	-4.24428
MADAN_DPPA4_TARGETS	-0.143282	0.00413775	-2.12606	0.0448715	0.124097	-4.25002
PID_IL5_PATHWAY	-0.322661	-0.0172927	-2.12599	0.044878	0.124097	-4.25015
REACTOME_SIGNAL_ATTENUATION	-0.355073	-0.0104522	-2.12494	0.0449743	0.124301	-4.252
STEGER_ADIPOGENESIS_UP	0.257129	-0.0268193	2.12408	0.0450534	0.124457	-4.25353
REACTOME_TRP_CHANNELS	-0.247605	-0.00410159	-2.12223	0.0452246	0.124842	-4.25682
BUCKANOVICH_T_LYMPHOCYTE_HOMING_ON_TUMOR_DN	-0.244687	-0.00317126	-2.12208	0.0452384	0.124842	-4.25708
KEGG_AXON_GUIDANCE	-0.114277	0.00815199	-2.12184	0.0452608	0.124842	-4.25751
KEGG_ARRHYTHMOGENIC_RIGHT_VENTRICULAR_CARDIOMYOPATHY_ARVC	-0.193339	0.00794887	-2.12148	0.0452945	0.124863	-4.25815
MCBRYAN_PUBERTAL_BREAST_4_5WK_DN	-0.156134	-0.00975435	-2.12105	0.045334	0.124863	-4.25891
KEGG_STARCH_AND_SUCROSE_METABOLISM	-0.295072	0.0110523	-2.12102	0.0453366	0.124863	-4.25896
DELPUECH_FOXO3_TARGETS_DN	0.332703	0.0133146	2.12018	0.0454152	0.125017	-4.26046
JOSEPH_RESPONSE_TO_SODIUM_BUTYRATE_UP	0.239046	-0.0157353	2.11952	0.0454761	0.12508	-4.26162
[truncated: 3,501 more rows]

## Sheet: HS5vsHS27A
C2	logFC	AveExpr	t	P.Value	adj.P.Val	B
PID_NFAT_3PATHWAY	0.643782	0.0338329	7.23105	2.89163e-07	0.000768818	6.87969
NIKOLSKY_BREAST_CANCER_20Q12_Q13_AMPLICON	0.626659	0.00227405	7.10148	3.84453e-07	0.000768818	6.61571
REACTOME_DSCAM_INTERACTIONS	0.853914	0.0368096	6.85899	6.59063e-07	0.000768818	6.11485
PID_P38_GAMMA_DELTA_PATHWAY	0.860516	0.0174524	6.72329	8.94045e-07	0.000768818	5.83078
SCHLESINGER_METHYLATED_DE_NOVO_IN_CANCER	0.534904	0.00734665	6.64984	1.05552e-06	0.000768818	5.67591
PID_WNT_CANONICAL_PATHWAY	0.620456	-0.002378	6.62287	1.12207e-06	0.000768818	5.61884
BIOCARTA_TERT_PATHWAY	0.798417	0.0401696	6.61375	1.14553e-06	0.000768818	5.59952
BIOCARTA_FBW7_PATHWAY	-0.864776	0.0449856	-6.57605	1.24798e-06	0.000768818	5.51953
LIANG_HEMATOPOIESIS_STEM_CELL_NUMBER_SMALL_VS_HUGE_DN	0.544141	0.014334	6.57251	1.25807e-06	0.000768818	5.51201
GRAHAM_CML_DIVIDING_VS_NORMAL_DIVIDING_UP	-0.653922	-0.0261871	-6.51828	1.42353e-06	0.000782939	5.39656
MURATA_VIRULENCE_OF_H_PILORI	0.730626	0.0337843	6.46903	1.59306e-06	0.000796529	5.29136
MARKS_HDAC_TARGETS_DN	0.814614	-0.00267818	6.37074	1.9959e-06	0.000914789	5.08041
GRATIAS_RETINOBLASTOMA_16Q24	-1.12483	0.00584056	-6.17583	3.13172e-06	0.00132496	4.65824
CHEN_HOXA5_TARGETS_6HR_DN	1.31789	0.0417599	6.112	3.63304e-06	0.00135325	4.5189
REACTOME_TRAF6_MEDIATED_IRF7_ACTIVATION	0.547919	0.0110599	6.07153	3.99276e-06	0.00135325	4.43027
PID_AR_TF_PATHWAY	0.521877	0.0137037	6.04106	4.28728e-06	0.00135325	4.36343
FLOTHO_PEDIATRIC_ALL_THERAPY_RESPONSE_DN	0.688641	0.00631302	6.03354	4.36336e-06	0.00135325	4.34691
PID_RAC1_PATHWAY	0.537498	0.0177166	6.00227	4.69478e-06	0.00135325	4.27813
NIKOLSKY_BREAST_CANCER_16Q24_AMPLICON	-0.643093	0.00298404	-5.99936	4.72682e-06	0.00135325	4.27174
TESAR_JAK_TARGETS_MOUSE_ES_D3_UP	0.889664	0.0146703	5.97884	4.95981e-06	0.00135325	4.22653
REACTOME_DDX58_IFIH1_MEDIATED_INDUCTION_OF_INTERFERON_ALPHA_BETA	0.53346	0.00887219	5.96139	5.16695e-06	0.00135325	4.18808
NIKOLSKY_BREAST_CANCER_10Q22_AMPLICON	1.10299	-0.00741688	5.90773	5.86141e-06	0.00144971	4.06952
GRANDVAUX_IRF3_TARGETS_UP	1.01135	0.012323	5.86431	6.49253e-06	0.00144971	3.97335
REACTOME_TFAP2_AP_2_FAMILY_REGULATES_TRANSCRIPTION_OF_CELL_CYCLE_FACTORS	0.957424	0.0912989	5.85029	6.7107e-06	0.00144971	3.94226
PID_HEDGEHOG_GLI_PATHWAY	0.562292	0.0146873	5.84537	6.78908e-06	0.00144971	3.93133
REACTOME_VITAMIN_B1_THIAMIN_METABOLISM	-0.93892	0.00824131	-5.84139	6.85319e-06	0.00144971	3.92249
TRAYNOR_RETT_SYNDROM_UP	0.563065	0.00286133	5.81655	7.26705e-06	0.00148033	3.86732
BASSO_CD40_SIGNALING_UP	0.452344	0.0151903	5.76652	8.17984e-06	0.00156411	3.75596
PID_PS1_PATHWAY	0.561309	0.0150704	5.76306	8.24712e-06	0.00156411	3.74825
REACTOME_MOLYBDENUM_COFACTOR_BIOSYNTHESIS	1.12612	-0.0028394	5.72322	9.0637e-06	0.00166168	3.65936
GROSS_ELK3_TARGETS_DN	0.651216	0.0254166	5.6575	1.05951e-05	0.00184261	3.51233
ROYLANCE_BREAST_CANCER_16Q_COPY_NUMBER_DN	-0.649867	-0.00991578	-5.65255	1.07206e-05	0.00184261	3.50124
NAKAMURA_METASTASIS_MODEL_DN	0.466887	0.00408527	5.63126	1.12777e-05	0.00185832	3.45351
REACTOME_TRAIL_SIGNALING	0.847822	0.0219136	5.60947	1.18787e-05	0.00185832	3.40459
MAINA_VHL_TARGETS_DN	0.699912	0.0685639	5.60879	1.1898e-05	0.00185832	3.40306
KEGG_RIG_I_LIKE_RECEPTOR_SIGNALING_PATHWAY	0.54511	0.0212453	5.59953	1.21635e-05	0.00185832	3.38226
EINAV_INTERFERON_SIGNATURE_IN_CANCER	0.764243	-0.00356215	5.54867	1.37332e-05	0.00204141	3.26787
REACTOME_MRNA_DECAY_BY_5_TO_3_EXORIBONUCLEASE	-0.617086	-0.0303938	-5.50628	1.51978e-05	0.00219968	3.17233
TONKS_TARGETS_OF_RUNX1_RUNX1T1_FUSION_ERYTHROCYTE_UP	0.403802	0.00097434	5.46486	1.67828e-05	0.0023668	3.07879
PID_ECADHERIN_NASCENT_AJ_PATHWAY	0.447407	0.0110457	5.45376	1.72352e-05	0.00236984	3.0537
DASU_IL6_SIGNALING_UP	0.667602	-0.00282282	5.42978	1.82557e-05	0.00237798	2.99944
BRACHAT_RESPONSE_TO_METHOTREXATE_DN	0.560324	-0.0124159	5.42921	1.82803e-05	0.00237798	2.99817
MEDINA_SMARCA4_TARGETS	0.426594	0.00995896	5.42218	1.85915e-05	0.00237798	2.98225
LEE_LIVER_CANCER_ACOX1_UP	0.387493	0.00503888	5.41041	1.91245e-05	0.00239056	2.95559
DORN_ADENOVIRUS_INFECTION_48HR_UP	0.674886	0.0457752	5.39159	2.00087e-05	0.0024455	2.91295
JACKSON_DNMT1_TARGETS_DN	0.784921	0.0441274	5.3738	2.08826e-05	0.00247344	2.87262
REACTOME_SIGNALING_BY_VEGF	0.433234	0.025788	5.36878	2.11367e-05	0.00247344	2.86121
NIKOLSKY_BREAST_CANCER_7Q21_Q22_AMPLICON	-0.632984	0.00565045	-5.28121	2.60992e-05	0.00299054	2.66219
XU_HGF_SIGNALING_NOT_VIA_AKT1_48HR_UP	0.557988	0.00903105	5.25533	2.77805e-05	0.00311822	2.60327
HEIDENBLAD_AMPLIFIED_IN_PANCREATIC_CANCER	-0.600391	-0.00359395	-5.20498	3.13737e-05	0.00332867	2.48845
HASLINGER_B_CLL_WITH_17P13_DELETION	0.573164	0.0191334	5.20379	3.14643e-05	0.00332867	2.48573
RAY_ALZHEIMERS_DISEASE	0.638517	0.0334816	5.2037	3.14711e-05	0.00332867	2.48552
ULE_SPLICING_VIA_NOVA2	0.392901	-0.00218785	5.17343	3.38617e-05	0.0034785	2.4164
REN_ALVEOLAR_RHABDOMYOSARCOMA_UP	0.430286	0.00883714	5.1699	3.41526e-05	0.0034785	2.40832
REACTOME_NEGATIVE_REGULATION_OF_NMDA_RECEPTOR_MEDIATED_NEURONAL_TRANSMISSION	0.573395	-0.00508407	5.16124	3.48755e-05	0.00348755	2.38855
REACTOME_CRMPS_IN_SEMA3A_SIGNALING	0.474628	0.0427415	5.10818	3.96602e-05	0.0038952	2.26715
NOJIMA_SFRP2_TARGETS_DN	0.544428	0.00634437	5.10085	4.03707e-05	0.00389542	2.25039
REACTOME_MAPK1_ERK2_ACTIVATION	0.953778	0.033672	5.07976	4.24898e-05	0.00402921	2.20207
BIOCARTA_IL12_PATHWAY	0.515122	0.0112318	5.03181	4.77363e-05	0.00445	2.09212
REACTOME_TRAF3_DEPENDENT_IRF_ACTIVATION_PATHWAY	0.811152	0.0027592	5.00493	5.09584e-05	0.00467118	2.03043
STAMBOLSKY_TARGETS_OF_MUTATED_TP53_UP	-0.337706	0.00115679	-4.99645	5.20197e-05	0.0046903	2.01097
CLAUS_PGR_POSITIVE_MENINGIOMA_UP	0.794204	0.00965322	4.98919	5.29472e-05	0.00469693	1.99428
BIOCARTA_WNT_PATHWAY	0.517507	0.0196876	4.96391	5.63059e-05	0.0049156	1.93618
MIKKELSEN_NPC_ICP_WITH_H3K27ME3	0.473931	-0.000753235	4.93609	6.025e-05	0.0049585	1.87224
KEGG_CHEMOKINE_SIGNALING_PATHWAY	0.33385	-0.00369549	4.93553	6.03334e-05	0.0049585	1.87093
REACTOME_INTERFERON_ALPHA_BETA_SIGNALING	0.561166	-0.00791715	4.93208	6.08411e-05	0.0049585	1.86302
FARMER_BREAST_CANCER_CLUSTER_1	0.561155	-0.0101684	4.9297	6.11951e-05	0.0049585	1.85754
SU_THYMUS	0.517547	0.01057	4.92896	6.13051e-05	0.0049585	1.85584
LEE_LIVER_CANCER_E2F1_UP	0.438144	-0.0144731	4.91633	6.32213e-05	0.00503938	1.82677
REACTOME_RUNX3_REGULATES_WNT_SIGNALING	0.790836	0.034411	4.91001	6.42021e-05	0.00504445	1.81223
KEGG_TYPE_II_DIABETES_MELLITUS	0.451641	0.00890362	4.89864	6.60054e-05	0.00510594	1.78607
ZHANG_INTERFERON_RESPONSE	0.805767	-0.018819	4.88908	6.75623e-05	0.00510594	1.76405
CROONQUIST_NRAS_VS_STROMAL_STIMULATION_UP	0.505245	0.000583025	4.87628	6.97029e-05	0.00510594	1.73459
REACTOME_TOLL_LIKE_RECEPTOR_4_TLR4_CASCADE	0.35767	0.00274478	4.87418	7.00618e-05	0.00510594	1.72974
MYLLYKANGAS_AMPLIFICATION_HOT_SPOT_17	0.586466	0.00358884	4.86173	7.22214e-05	0.00510594	1.70106
PID_TCR_JNK_PATHWAY	0.671765	0.0304485	4.86047	7.24434e-05	0.00510594	1.69816
PID_NECTIN_PATHWAY	0.487609	-0.00141976	4.85271	7.38268e-05	0.00510594	1.6803
FULCHER_INFLAMMATORY_RESPONSE_LECTIN_VS_LPS_DN	0.351356	0.00341791	4.85046	7.42336e-05	0.00510594	1.67511
DORN_ADENOVIRUS_INFECTION_32HR_UP	0.667893	0.0314621	4.84596	7.50528e-05	0.00510594	1.66474
REACTOME_FBXW7_MUTANTS_AND_NOTCH1_IN_CANCER	-0.638926	-0.0256509	-4.843	7.55981e-05	0.00510594	1.6579
ALTEMEIER_RESPONSE_TO_LPS_WITH_MECHANICAL_VENTILATION	0.42602	0.0250326	4.84255	7.56807e-05	0.00510594	1.65687
REACTOME_TRNA_PROCESSING_IN_THE_MITOCHONDRION	-1.07849	-0.000237719	-4.83133	7.77808e-05	0.00510594	1.63102
BIOCARTA_PARKIN_PATHWAY	0.532835	0.00991679	4.83108	7.78287e-05	0.00510594	1.63044
DAUER_STAT3_TARGETS_DN	0.684144	0.000575713	4.82522	7.89497e-05	0.00510594	1.61693
HECKER_IFNB1_TARGETS	0.503678	-0.0108179	4.81783	8.03859e-05	0.00510594	1.5999
REACTOME_NCAM1_INTERACTIONS	0.429322	0.00482595	4.81724	8.05028e-05	0.00510594	1.59853
ISHIKAWA_STING_SIGNALING	0.739127	0.0501767	4.81078	8.17824e-05	0.00510594	1.58364
MARSON_FOXP3_TARGETS_UP	0.440483	0.016366	4.8103	8.18776e-05	0.00510594	1.58254
REACTOME_TOLL_LIKE_RECEPTOR_CASCADES	0.359805	-8.0984e-05	4.80552	8.28389e-05	0.00510594	1.57151
PID_INTEGRIN_A4B1_PATHWAY	0.467119	0.0153321	4.80201	8.35518e-05	0.00510594	1.56342
STAMBOLSKY_TARGETS_OF_MUTATED_TP53_DN	0.562586	-0.00717843	4.78879	8.62938e-05	0.00521556	1.53292
KORKOLA_SEMINOMA_DN	-0.575731	0.0236477	-4.77461	8.93352e-05	0.00534069	1.50021
GRAHAM_CML_QUIESCENT_VS_CML_DIVIDING_UP	0.714542	0.0151135	4.76564	9.13139e-05	0.00540028	1.47952
JOHANSSON_GLIOMAGENESIS_BY_PDGFB_DN	0.606065	0.00224708	4.75828	9.29711e-05	0.0054398	1.46253
REACTOME_FCGAMMA_RECEPTOR_FCGR_DEPENDENT_PHAGOCYTOSIS	0.370673	0.0127417	4.75144	9.45396e-05	0.00547334	1.44673
ENGELMANN_CANCER_PROGENITORS_DN	0.314104	-0.00779494	4.74533	9.59607e-05	0.00548715	1.43264
YEMELYANOV_GR_TARGETS_DN	0.61888	0.0336347	4.73599	9.8178e-05	0.00548715	1.41107
SCHAEFFER_PROSTATE_DEVELOPMENT_AND_CANCER_BOX5_UP	0.748839	0.0203067	4.73525	9.83557e-05	0.00548715	1.40936
REACTOME_PROTEIN_REPAIR	-0.80078	-0.0238159	-4.73353	9.87686e-05	0.00548715	1.4054
MEISSNER_NPC_HCP_WITH_H3K4ME2	0.344592	-0.00297131	4.72333	0.000101264	0.00555556	1.38184
KORKOLA_EMBRYONAL_CARCINOMA_DN	-0.572869	0.0110295	-4.71889	0.000102368	0.00555556	1.3716
MYLLYKANGAS_AMPLIFICATION_HOT_SPOT_25	0.721827	-0.0235094	4.71317	0.000103811	0.00555556	1.35838
DORN_ADENOVIRUS_INFECTION_12HR_UP	0.553558	0.015685	4.71226	0.000104041	0.00555556	1.35629
BOWIE_RESPONSE_TO_TAMOXIFEN	0.879608	0.0099067	4.69431	0.00010871	0.00570704	1.31483
HOLLEMAN_DAUNORUBICIN_B_ALL_DN	0.584719	0.0252483	4.6934	0.000108953	0.00570704	1.31273
BROWNE_HCMV_INFECTION_18HR_DN	0.376156	0.000997548	4.68471	0.000111294	0.00577468	1.29265
BIOCARTA_PTDINS_PATHWAY	0.562857	0.0221337	4.66321	0.000117304	0.00592955	1.24298
BIOCARTA_VDR_PATHWAY	0.595244	0.00334952	4.65908	0.000118498	0.00592955	1.23342
CROONQUIST_STROMAL_STIMULATION_DN	0.778678	0.000995389	4.65864	0.000118626	0.00592955	1.23241
REACTOME_NCAM_SIGNALING_FOR_NEURITE_OUT_GROWTH	0.375984	0.00854304	4.65476	0.000119757	0.00592955	1.22344
PID_P38_ALPHA_BETA_PATHWAY	0.516331	0.00255472	4.65323	0.000120205	0.00592955	1.21992
BURTON_ADIPOGENESIS_7	0.452632	-0.00785007	4.65139	0.000120747	0.00592955	1.21567
BIOCARTA_NTHI_PATHWAY	0.589162	0.0281074	4.64764	0.000121861	0.0059313	1.207
NIKOLSKY_BREAST_CANCER_7P15_AMPLICON	-0.837625	-0.00485968	-4.63399	0.000126003	0.00607911	1.17544
LEIN_LOCALIZED_TO_DISTAL_AND_PROXIMAL_DENDRITES	0.524604	0.0220985	4.62876	0.000127626	0.00609605	1.16336
MOSERLE_IFNA_RESPONSE	0.796099	-0.0241211	4.62393	0.000129144	0.00609605	1.15219
HOLLERN_EMT_BREAST_TUMOR_DN	0.329675	0.00315992	4.62026	0.000130309	0.00609605	1.14371
PID_EPO_PATHWAY	0.630703	0.00598158	4.61876	0.000130788	0.00609605	1.14025
PID_PI3KCI_PATHWAY	0.414667	0.00251026	4.58658	0.000141512	0.00654045	1.06585
TERAO_AOX4_TARGETS_HG_DN	0.952995	0.0373332	4.57718	0.000144811	0.00655693	1.04409
FONTAINE_PAPILLARY_THYROID_CARCINOMA_UP	0.461211	0.00429014	4.57715	0.000144819	0.00655693	1.04404
MCCABE_HOXC6_TARGETS_CANCER_DN	-0.485247	0.00538842	-4.57426	0.000145847	0.00655693	1.03736
ROVERSI_GLIOMA_LOH_REGIONS	-0.410932	0.00885909	-4.57206	0.000146637	0.00655693	1.03226
REACTOME_DISEASES_ASSOCIATED_WITH_N_GLYCOSYLATION_OF_PROTEINS	-0.779371	-0.018747	-4.55835	0.000151645	0.00671669	1.00056
PID_ANTHRAX_PATHWAY	0.535439	-0.0206671	4.55565	0.000152652	0.00671669	0.994311
SANA_TNF_SIGNALING_UP	0.46168	0.0280442	4.54519	0.000156615	0.00683637	0.970118
GROSS_HYPOXIA_VIA_ELK3_ONLY_UP	0.500258	0.00403051	4.53486	0.00016063	0.0069564	0.946228
PID_P38_MKK3_6PATHWAY	0.587592	0.00715558	4.52567	0.00016429	0.00701923	0.924961
PID_RETINOIC_ACID_PATHWAY	0.494009	0.0203477	4.52482	0.000164633	0.00701923	0.922993
LIANG_SILENCED_BY_METHYLATION_2	0.639695	0.0178808	4.51231	0.000169758	0.00718209	0.894057
PID_TRAIL_PATHWAY	0.500213	0.00882648	4.50842	0.000171384	0.00719553	0.88506
KEGG_WNT_SIGNALING_PATHWAY	0.355368	0.0100416	4.50261	0.00017384	0.00721293	0.871634
PID_LYSOPHOSPHOLIPID_PATHWAY	0.4319	-3.09937e-05	4.50125	0.000174422	0.00721293	0.868481
ZHENG_IL22_SIGNALING_UP	0.463384	-0.00815018	4.49376	0.000177655	0.00725111	0.851145
BIOCARTA_IL1R_PATHWAY	0.566096	0.022186	4.49301	0.000177982	0.00725111	0.849412
YORDY_RECIPROCAL_REGULATION_BY_ETS1_AND_SP100_UP	0.573829	-0.00648446	4.48366	0.000182106	0.00736456	0.827797
REACTOME_TOLL_LIKE_RECEPTOR_TLR1:TLR2_CASCADE	0.338199	0.00356701	4.47849	0.000184428	0.00740405	0.815837
UROSEVIC_RESPONSE_TO_IMIQUIMOD	0.773489	-0.00838897	4.47194	0.000187414	0.00746938	0.800684
DASU_IL6_SIGNALING_SCAR_UP	0.549816	-0.00378157	4.46805	0.000189209	0.0074867	0.791686
REACTOME_INTERLEUKIN_27_SIGNALING	0.72064	0.0151793	4.447	0.000199234	0.00782706	0.742972
HUI_MAPK14_TARGETS_UP	0.611265	0.000978125	4.44105	0.000202159	0.00788563	0.729223
PID_IL23_PATHWAY	0.494979	0.0037039	4.42791	0.000208778	0.00808646	0.698829
REACTOME_NF_KB_ACTIVATION_THROUGH_FADD_RIP_1_PATHWAY_MEDIATED_BY_CASPASE_8_AND_10	0.665153	-0.00595024	4.4245	0.000210531	0.00809736	0.690938
BIOCARTA_PS1_PATHWAY	0.542033	0.0247512	4.39485	0.000226412	0.00849974	0.622337
REACTOME_OTHER_SEMAPHORIN_INTERACTIONS	0.517478	0.00208355	4.39428	0.000226727	0.00849974	0.621024
DASU_IL6_SIGNALING_DN	-0.736669	0.0145054	-4.39323	0.00022731	0.00849974	0.618604
FAELT_B_CLL_WITH_VH_REARRANGEMENTS_DN	-0.329018	-0.00132384	-4.39321	0.000227326	0.00849974	0.618538
REACTOME_UNFOLDED_PROTEIN_RESPONSE_UPR	-0.444908	0.018832	-4.38954	0.000229381	0.00849974	0.61005
REACTOME_TRAF6_MEDIATED_NF_KB_ACTIVATION	0.608239	0.00917951	4.38797	0.000230266	0.00849974	0.606418
MARKEY_RB1_ACUTE_LOF_DN	0.359033	0.0115694	4.36686	0.000242499	0.00886652	0.557599
DAZARD_UV_RESPONSE_CLUSTER_G3	0.511569	0.0142002	4.3653	0.000243426	0.00886652	0.553998
WU_HBX_TARGETS_3_DN	0.632288	0.0239284	4.34827	0.000253812	0.00917666	0.514598
TAKEDA_TARGETS_OF_NUP98_HOXA9_FUSION_16D_DN	0.316514	-0.00808528	4.34581	0.000255348	0.00917666	0.508908
REACTOME_INTERLEUKIN_35_SIGNALLING	0.75326	0.044995	4.34326	0.000256946	0.00917666	0.503025
REACTOME_MET_ACTIVATES_RAS_SIGNALING	-0.55421	0.0010369	-4.33602	0.000261553	0.00928091	0.48627
BIOCARTA_ACETAMINOPHEN_PATHWAY	0.909975	0.0457917	4.33248	0.00026383	0.00930171	0.478096
GALLUZZI_PREVENT_MITOCHONDIAL_PERMEABILIZATION	0.63397	0.0180812	4.32759	0.000267016	0.00935407	0.466778
REACTOME_PTK6_REGULATES_PROTEINS_INVOLVED_IN_RNA_PROCESSING	0.906643	-0.0341629	4.32296	0.000270066	0.00940105	0.456069
REACTOME_INTERLEUKIN_4_AND_INTERLEUKIN_13_SIGNALING	0.423521	0.00542605	4.31825	0.000273199	0.0094503	0.445194
HOLLEMAN_ASPARAGINASE_RESISTANCE_B_ALL_DN	0.681296	0.0286465	4.31457	0.000275679	0.00947645	0.436678
REACTOME_REGULATION_BY_C_FLIP	0.606428	-0.00024128	4.30986	0.000278879	0.00947696	0.425796
ONO_FOXP3_TARGETS_DN	0.420302	-0.00555231	4.30858	0.000279761	0.00947696	0.422819
REACTOME_CYTOKINE_SIGNALING_IN_IMMUNE_SYSTEM	0.260258	-0.0020848	4.30327	0.000283426	0.00947696	0.41055
PID_AR_NONGENOMIC_PATHWAY	0.463302	0.0112622	4.30315	0.000283508	0.00947696	0.410278
LIN_MELANOMA_COPY_NUMBER_DN	-0.574239	0.0283959	-4.302	0.000284309	0.00947696	0.407618
MATZUK_PREOVULATORY_FOLLICLE	-0.672075	0.00705566	-4.29258	0.000290955	0.00964009	0.385834
LINDGREN_BLADDER_CANCER_WITH_LOH_IN_CHR9Q	-0.354512	0.0033911	-4.28759	0.000294534	0.00970022	0.374312
PID_IL12_2PATHWAY	0.425404	0.021761	4.28494	0.000296456	0.00970539	0.368182
OHM_METHYLATED_IN_ADULT_CANCERS	0.417168	0.00336291	4.28048	0.000299716	0.00972517	0.357873
YIH_RESPONSE_TO_ARSENITE_C5	0.648367	0.0287778	4.27928	0.000300596	0.00972517	0.355109
VALK_AML_CLUSTER_4	0.486636	0.0153825	4.2702	0.000307366	0.00988604	0.334117
VERHAAK_AML_WITH_NPM1_MUTATED_UP	0.302485	0.00509737	4.26774	0.000309224	0.00988797	0.328439
REACTOME_SYNTHESIS_OF_DOLICHYL_PHOSPHATE	-0.792623	-0.0347708	-4.26456	0.000311652	0.009908	0.321068
RAFFEL_VEGFA_TARGETS_UP	0.762996	-0.0133391	4.25326	0.000320408	0.0101278	0.294955
SAGIV_CD24_TARGETS_DN	0.434503	0.0164716	4.24678	0.000325537	0.0102312	0.279989
KEGG_LEUKOCYTE_TRANSENDOTHELIAL_MIGRATION	0.309183	-0.0077672	4.24386	0.000327878	0.0102462	0.273238
BOSCO_TH1_CYTOTOXIC_MODULE	0.338095	0.00158671	4.24094	0.00033023	0.0102614	0.266502
REACTOME_IKBA_VARIANT_LEADS_TO_EDA_ID	0.688305	0.0324497	4.23835	0.000332332	0.0102687	0.260525
HASLINGER_B_CLL_WITH_MUTATED_VH_GENES	-0.524336	0.00302304	-4.22776	0.000341073	0.0104799	0.236063
REACTOME_BETA_OXIDATION_OF_HEXANOYL_COA_TO_BUTANOYL_COA	0.86926	0.0313917	4.224	0.000344237	0.0105184	0.227364
SCHEIDEREIT_IKK_TARGETS	0.65483	0.0304991	4.21423	0.000352584	0.0106898	0.204794
MYLLYKANGAS_AMPLIFICATION_HOT_SPOT_16	0.613262	0.00540762	4.21176	0.000354724	0.0106898	0.199093
PID_REG_GR_PATHWAY	0.428315	0.0126124	4.20211	0.000363215	0.0106898	0.176809
REACTOME_NEGATIVE_REGULATORS_OF_DDX58_IFIH1_SIGNALING	0.515815	-0.00373145	4.20208	0.000363243	0.0106898	0.176737
REACTOME_MISSPLICED_LRP5_MUTANTS_HAVE_ENHANCED_BETA_CATENIN_DEPENDENT_SIGNALING	0.817524	-0.0460445	4.1996	0.000365451	0.0106898	0.171029
SEKI_INFLAMMATORY_RESPONSE_LPS_UP	0.463007	0.0136184	4.19852	0.000366424	0.0106898	0.168524
SMITH_TERT_TARGETS_DN	0.391064	0.0105104	4.19821	0.000366704	0.0106898	0.167806
PID_IFNG_PATHWAY	0.428667	0.0180178	4.19786	0.000367017	0.0106898	0.167002
REACTOME_FCERI_MEDIATED_MAPK_ACTIVATION	0.420891	0.00723736	4.19573	0.000368937	0.0106898	0.162086
BIOCARTA_41BB_PATHWAY	0.635402	0.0420253	4.19468	0.000369888	0.0106898	0.159662
REACTOME_NICOTINAMIDE_SALVAGING	0.544012	0.00268443	4.18815	0.000375854	0.0106898	0.144592
GALINDO_IMMUNE_RESPONSE_TO_ENTEROTOXIN	0.323317	0.017678	4.18789	0.000376099	0.0106898	0.143978
TAVOR_CEBPA_TARGETS_DN	0.391137	0.028567	4.1873	0.000376642	0.0106898	0.14262
KEGG_NOD_LIKE_RECEPTOR_SIGNALING_PATHWAY	0.37108	0.0078851	4.18685	0.000377059	0.0106898	0.141578
ZHANG_RESPONSE_TO_IKK_INHIBITOR_AND_TNF_UP	0.404109	0.0211773	4.17758	0.000385725	0.0107932	0.120176
REACTOME_SIGNALING_BY_WNT_IN_CANCER	0.531939	0.00151325	4.17577	0.000387436	0.0107932	0.116009
MIKKELSEN_NPC_HCP_WITH_H3K27ME3	0.277494	0.00632987	4.17549	0.000387699	0.0107932	0.115369
PID_BCR_5PATHWAY	0.431149	0.0144498	4.17459	0.000388556	0.0107932	0.11329
XU_HGF_TARGETS_INDUCED_BY_AKT1_48HR_UP	0.488163	0.02434	4.1618	0.000400929	0.0109866	0.0837721
REACTOME_GPVI_MEDIATED_ACTIVATION_CASCADE	0.42523	0.0106121	4.16146	0.000401268	0.0109866	0.0829749
KEGG_TOLL_LIKE_RECEPTOR_SIGNALING_PATHWAY	0.41945	0.0035008	4.15628	0.000406388	0.0109866	0.0710376
NIKOLSKY_BREAST_CANCER_19Q13.1_AMPLICON	-0.586808	0.00500507	-4.15588	0.000406791	0.0109866	0.0701046
ROYLANCE_BREAST_CANCER_16Q_COPY_NUMBER_UP	-0.392619	0.00384811	-4.15454	0.000408131	0.0109866	0.0670071
MARSHALL_VIRAL_INFECTION_RESPONSE_UP	0.785145	0.0397388	4.15191	0.000410765	0.0109866	0.0609517
BIOCARTA_PCAF_PATHWAY	0.531155	0.024905	4.15152	0.000411154	0.0109866	0.0600593
PID_INSULIN_GLUCOSE_PATHWAY	0.536531	0.0153041	4.15118	0.0004115	0.0109866	0.0592683
GRAHAM_CML_QUIESCENT_VS_NORMAL_DIVIDING_UP	0.569309	0.0105831	4.14569	0.000417073	0.0110461	0.0466032
DORN_ADENOVIRUS_INFECTION_24HR_DN	0.397702	0.013177	4.14504	0.000417743	0.0110461	0.0450903
REACTOME_PTK6_REGULATES_RHO_GTPASES_RAS_GTPASE_AND_MAP_KINASES	0.477068	0.00349158	4.14172	0.000421151	0.0110829	0.0374423
WU_HBX_TARGETS_2_DN	0.672794	0.0194698	4.13951	0.000423433	0.0110899	0.0323556
SMID_BREAST_CANCER_NORMAL_LIKE_DN	-0.838574	-0.0351826	-4.136	0.000427099	0.0111329	0.0242399
BIOCARTA_AKAP13_PATHWAY	0.472233	-0.00473778	4.13318	0.000430052	0.011157	0.017753
REACTOME_TGF_BETA_RECEPTOR_SIGNALING_ACTIVATES_SMADS	-0.428276	0.00612905	-4.12822	0.000435317	0.0112175	0.00629797
NIKOLSKY_BREAST_CANCER_12Q13_Q21_AMPLICON	-0.319795	0.00434217	-4.12714	0.000436462	0.0112175	0.00382561
BIOCARTA_P27_PATHWAY	-0.706651	-0.00256964	-4.11984	0.00044434	0.0113049	-0.0130128
TSAI_RESPONSE_TO_IONIZING_RADIATION	0.252342	0.0168469	4.11968	0.000444515	0.0113049	-0.0133827
CALVET_IRINOTECAN_SENSITIVE_VS_REVERTED_UP	0.850312	-0.013596	4.11829	0.000446028	0.0113049	-0.0165805
REACTOME_SUMOYLATION_OF_TRANSCRIPTION_FACTORS	0.46961	0.0263658	4.11323	0.00045159	0.0113933	-0.0282454
REACTOME_IRE1ALPHA_ACTIVATES_CHAPERONES	-0.473928	0.00446489	-4.10944	0.000455805	0.0114262	-0.0369892
PID_IGF1_PATHWAY	0.507878	2.27427e-05	4.10833	0.000457048	0.0114262	-0.0395522
REACTOME_ACTIVATED_NTRK3_SIGNALS_THROUGH_RAS	-0.542794	-0.0177987	-4.09481	0.000472439	0.011705	-0.0707204
REACTOME_PROCESSING_OF_SMDT1	-0.490718	0.00356954	-4.09479	0.000472457	0.011705	-0.0707555
REACTOME_PYRIMIDINE_SALVAGE	0.661232	0.0266597	4.09117	0.000476663	0.0117165	-0.0790956
REACTOME_SEMAPHORIN_INTERACTIONS	0.350721	0.000163842	4.08876	0.000479485	0.0117165	-0.0846494
BROWNE_HCMV_INFECTION_14HR_UP	-0.358845	-0.00256782	-4.08671	0.000481897	0.0117165	-0.0893719
ZEILSTRA_CD44_TARGETS_UP	0.739602	0.0127311	4.0858	0.000482977	0.0117165	-0.0914787
REACTOME_INTERFERON_GAMMA_SIGNALING	0.421485	-0.00793713	4.08293	0.000486373	0.0117165	-0.098071
HONRADO_BREAST_CANCER_BRCA1_VS_BRCA2	0.470536	-0.0240643	4.08191	0.000487591	0.0117165	-0.100424
KEGG_THYROID_CANCER	0.414484	0.0124665	4.08047	0.000489318	0.0117165	-0.103751
PID_ILK_PATHWAY	0.400968	0.00253701	4.07653	0.000494062	0.0117165	-0.112828
HUMMERICH_MALIGNANT_SKIN_TUMOR_UP	0.504811	-0.0121688	4.07607	0.000494618	0.0117165	-0.113886
REACTOME_ERYTHROPOIETIN_ACTIVATES_PHOSPHOLIPASE_C_GAMMA_PLCG	0.811256	0.00885633	4.07596	0.000494753	0.0117165	-0.114143
REACTOME_SYNTHESIS_OF_15_EICOSATETRAENOIC_ACID_DERIVATIVES	0.811192	0.0329206	4.07034	0.000501602	0.0117165	-0.127077
REACTOME_MTORC1_MEDIATED_SIGNALLING	0.556722	-0.024867	4.06683	0.000505936	0.0117165	-0.135171
BIOCARTA_VIP_PATHWAY	0.504872	-0.00452695	4.0655	0.00050758	0.0117165	-0.138223
HASEGAWA_TUMORIGENESIS_BY_RET_C634R	0.929569	-0.0156912	4.06535	0.000507765	0.0117165	-0.138566
KEGG_NEUROTROPHIN_SIGNALING_PATHWAY	0.362323	0.0147779	4.06416	0.000509256	0.0117165	-0.141323
REACTOME_RUNX1_REGULATES_TRANSCRIPTION_OF_GENES_INVOLVED_IN_INTERLEUKIN_SIGNALING	-0.897052	0.0043004	-4.06257	0.000511241	0.0117165	-0.144982
KONDO_COLON_CANCER_HCP_WITH_H3K27ME1	0.427903	0.0101774	4.06048	0.000513863	0.0117165	-0.149794
HINATA_NFKB_TARGETS_KERATINOCYTE_UP	0.412568	0.0256302	4.06038	0.000513986	0.0117165	-0.15002
FARMER_BREAST_CANCER_CLUSTER_3	0.643602	0.0303916	4.06025	0.000514148	0.0117165	-0.150317
REACTOME_COPII_MEDIATED_VESICLE_TRANSPORT	-0.428103	0.0220544	-4.05916	0.000515524	0.0117165	-0.152831
PID_FCER1_PATHWAY	0.401333	-9.30608e-05	4.05625	0.000519212	0.0117517	-0.159537
VANLOO_SP3_TARGETS_UP	0.655404	-0.000198019	4.05108	0.000525814	0.0118524	-0.171421
MEISSNER_NPC_HCP_WITH_H3K4ME2_AND_H3K27ME3	0.293872	0.00852687	4.04685	0.00053129	0.0119037	-0.181165
TIAN_TNF_SIGNALING_VIA_NFKB	0.655201	0.0368149	4.04558	0.000532939	0.0119037	-0.18408
GROSS_HIF1A_TARGETS_UP	0.733108	0.0506061	4.04433	0.000534582	0.0119037	-0.186975
REACTOME_RRNA_PROCESSING_IN_THE_MITOCHONDRION	-0.918784	-0.0216148	-4.03682	0.000544494	0.0120755	-0.204252
TSENG_ADIPOGENIC_POTENTIAL_DN	0.402296	0.0216225	4.03468	0.000547346	0.01209	-0.209166
BOYLAN_MULTIPLE_MYELOMA_PCA1_DN	-0.454071	-0.0142567	-4.02967	0.000554106	0.0121427	-0.220708
REACTOME_INTERFERON_SIGNALING	0.366232	-0.00405426	4.02963	0.00055415	0.0121427	-0.220782
REACTOME_NEGATIVE_REGULATION_OF_TCF_DEPENDENT_SIGNALING_BY_WNT_LIGAND_ANTAGONISTS	0.624452	-0.000774994	4.02598	0.000559125	0.012162	-0.229187
REACTOME_TRNA_MODIFICATION_IN_THE_MITOCHONDRION	-0.757812	-0.0366945	-4.02574	0.000559452	0.012162	-0.229737
REACTOME_CASPASE_ACTIVATION_VIA_DEATH_RECEPTORS_IN_THE_PRESENCE_OF_LIGAND	0.532707	-0.00952655	4.00993	0.000581522	0.012592	-0.266114
MOROSETTI_FACIOSCAPULOHUMERAL_MUSCULAR_DISTROPHY_DN	0.536972	0.00848031	4.00796	0.000584324	0.0126031	-0.270632
REACTOME_SEMA3A_PLEXIN_REPULSION_SIGNALING_BY_INHIBITING_INTEGRIN_ADHESION	0.488267	0.0169317	4.00165	0.000593406	0.012749	-0.285131
BILANGES_SERUM_SENSITIVE_GENES	0.35706	0.00103677	3.99895	0.00059734	0.0127835	-0.291342
KYNG_RESPONSE_TO_H2O2_VIA_ERCC6	0.471567	0.0118932	3.99406	0.000604522	0.0128871	-0.302578
JEON_SMAD6_TARGETS_UP	0.480093	-0.000214718	3.99042	0.000609927	0.0129521	-0.310944
REACTOME_INTERLEUKIN_20_FAMILY_SIGNALING	0.514733	-0.0113084	3.98456	0.000618729	0.0130813	-0.324409
REACTOME_RUNX1_REGULATES_ESTROGEN_RECEPTOR_MEDIATED_TRANSCRIPTION	-0.751772	0.0443509	-3.98117	0.000623884	0.0130813	-0.332208
WOOD_EBV_EBNA1_TARGETS_UP	0.316826	0.00051328	3.9787	0.000627661	0.0130813	-0.33788
KYNG_ENVIRONMENTAL_STRESS_RESPONSE_NOT_BY_4NQO_IN_WS	-0.437812	0.0120596	-3.97832	0.000628246	0.0130813	-0.338755
REACTOME_RUNX1_REGULATES_TRANSCRIPTION_OF_GENES_INVOLVED_IN_BCR_SIGNALING	-0.749885	0.0355777	-3.97622	0.00063148	0.0130813	-0.34358
BENNETT_SYSTEMIC_LUPUS_ERYTHEMATOSUS	0.604618	-0.0334932	3.97588	0.000632005	0.0130813	-0.344362
JU_AGING_TERC_TARGETS_UP	0.64124	0.0368748	3.97545	0.00063266	0.0130813	-0.345336
REACTOME_APOPTOTIC_CLEAVAGE_OF_CELLULAR_PROTEINS	0.326161	0.000184985	3.97278	0.000636813	0.0130859	-0.351484
REACTOME_HS_GAG_BIOSYNTHESIS	0.498283	-0.0124075	3.97111	0.000639408	0.0130859	-0.355306
PID_TXA2PATHWAY	0.429626	0.0115695	3.97072	0.00064002	0.0130859	-0.356204
IIZUKA_LIVER_CANCER_EARLY_RECURRENCE	0.466189	-0.00082325	3.96216	0.000653562	0.0133133	-0.375878
WANG_ADIPOGENIC_GENES_REPRESSED_BY_SIRT1	0.486605	-0.0181872	3.95472	0.00066554	0.0135073	-0.392941
ROETH_TERT_TARGETS_UP	0.473847	0.00998936	3.94662	0.000678842	0.0137266	-0.411532
REACTOME_ACTIVATION_OF_THE_AP_1_FAMILY_OF_TRANSCRIPTION_FACTORS	0.698432	-0.0156717	3.94403	0.000683153	0.0137632	-0.417478
REACTOME_FCERI_MEDIATED_CAPLUS2_MOBILIZATION	0.424829	0.0186771	3.94164	0.000687151	0.0137932	-0.42296
CUI_GLUCOSE_DEPRIVATION	-0.335007	0.00640621	-3.9356	0.00069737	0.0139474	-0.436825
MYLLYKANGAS_AMPLIFICATION_HOT_SPOT_2	-0.806069	0.0349682	-3.93394	0.000700198	0.0139532	-0.440627
PID_PI3K_PLC_TRK_PATHWAY	0.512849	-0.000175712	3.92231	0.000720379	0.0142764	-0.467312
ZHAN_MULTIPLE_MYELOMA_CD1_VS_CD2_DN	0.379701	-0.00232684	3.92161	0.000721608	0.0142764	-0.468913
STEIN_ESRRA_TARGETS_DN	0.250799	0.0132688	3.91366	0.00073575	0.014504	-0.487138
BIOCARTA_GRANULOCYTES_PATHWAY	0.474443	0.000155118	3.91108	0.0007404	0.0145436	-0.493054
BIOCARTA_HDAC_PATHWAY	0.466502	0.00348246	3.90065	0.000759488	0.0148419	-0.516951
KEGG_B_CELL_RECEPTOR_SIGNALING_PATHWAY	0.338111	0.0122259	3.89984	0.000760983	0.0148419	-0.518798
IYENGAR_RESPONSE_TO_ADIPOCYTE_FACTORS	0.618121	0.0502458	3.89808	0.000764274	0.0148534	-0.522849
FIGUEROA_AML_METHYLATION_CLUSTER_1_DN	0.382041	-0.00972449	3.88994	0.000779601	0.0150187	-0.541489
MEISSNER_NPC_HCP_WITH_H3K4ME3_AND_H3K27ME3	0.312994	-0.00563494	3.8899	0.000779669	0.0150187	-0.54157
PID_P53_DOWNSTREAM_PATHWAY	0.365031	0.00540671	3.88922	0.00078097	0.0150187	-0.543136
[truncated: 5,214 more rows]
